# Supplementary material for: Highly Cα-regio-, enantio- and diastereoselective Mukaiyama-type annulation of siloxyfurans: stereodivergent synthesis of multi-stereogenic tricyclic γ-lactones
Source: Royal Society of Chemistry journal article supplement (doi:10.1039/d6sc01491g), 2026-04-29
Supplement: d6sc01491g1.pdf [file d6sc01491g1.pdf]

# Supplementary Information

## Highly $\alpha$ -Regio-, Enantio- and Diastereoselective Mukaiyama-type Annulation of Siloxyfurans: Stereodivergent Synthesis of Multi-stereogenic Tricyclic $\gamma$ -Lactones

Lifei Gan,<sup>‡a</sup> Zi-Qing Li,<sup>‡b</sup> Tao Chen,<sup>‡a</sup> Xuanchen Wan,<sup>a,d</sup> Junyang Zhang,<sup>a</sup> Jiangtao Ren,<sup>a</sup> Ming Jiang,<sup>a</sup> Penglong Cao,<sup>a</sup> Jinhai Huang,<sup>a</sup> Yu-Hua Deng,<sup>\*a</sup> Fangzhi Peng,<sup>a</sup> Run Tian,<sup>c</sup> Yingcheng Wang,<sup>\*a</sup> Zhihan Zhang,<sup>\*b</sup> and Zhihui Shao<sup>\*a,d</sup>

<sup>a</sup> Key Laboratory of Medicinal Chemistry for Natural Resource, Ministry of Education, School of Chemical Science and Technology, School of Pharmacy, and State Key Laboratory for Conservation and Utilization of Bio-Resources in Yunnan, Yunnan University; Kunming 650091, China

<sup>b</sup> College of Chemistry, Central China Normal University; Wuhan, 430079, China

<sup>c</sup> Yunnan University Affiliated Hospital, Yunnan University; Kunming, 650000, China

<sup>d</sup> Southwest United Graduate School; Kunming 650092, China

E-mail: zhihui\_shao@hotmail.com; zhihanzhang@ccnu.edu.cn.

### Table of contents

|                                                                            |      |
|----------------------------------------------------------------------------|------|
| 1. General information .....                                               | S1   |
| 2. Competitive reaction pathways and optimization reaction condition ..... | S2   |
| 3. General procedures for catalytic asymmetric [3+2]-annulation .....      | S11  |
| 4. Mechanism studies .....                                                 | S27  |
| 5. Gram-scale reaction .....                                               | S70  |
| 6. Synthetic transformations .....                                         | S72  |
| 7. Single-crystal x-ray diffraction data .....                             | S93  |
| 8. References .....                                                        | S100 |
| 9. NMR spectra .....                                                       | S104 |
| 10. HPLC spectra .....                                                     | S167 |

## 1. General information

Unless otherwise noted, all reactions were set up in a 10 mL Teflon-screw capped test tubes under the atmosphere of Argon (Ar). Solvents were purified under Ar using a solvent purification system.

**Analytical thin layer chromatography (TLC)** was performed using silica gel plates. Visualisation was detected by ultraviolet fluorescence, and/or phosphomolybdic acid, and/or  $\text{KMnO}_4$ .

**Flash column chromatography (FC)** was performed using *Qingdao* (200-300 mesh) silica gel.

**NMR:**  $^1\text{H}$  NMR,  $^{13}\text{C}$  NMR,  $^{19}\text{F}$  NMR spectra were recorded on Bruker Avance 400 MHz, 500 MHz, 600 MHz Spectrometer.  $^1\text{H}$  and  $^{13}\text{C}$  chemical shifts were referenced internally to residual solvent peaks relative to TMS ( $\delta = 0$  ppm) at 299 K. Chemical shifts ( $\delta$  (ppm)) are reported relative to TMS ( $\delta$  ( $^1\text{H}$ ) 0.0 ppm,  $\delta$  ( $^{13}\text{C}$ ) 0.0 ppm). The solvents' residual proton resonance and the respective carbon resonance (for  $\text{CHCl}_3$ ;  $\delta$  ( $^1\text{H}$ ) 7.26 ppm,  $\delta$  ( $^{13}\text{C}$ ) 77.0 ppm) were used for calibration.

**HPLC** spectra were recorded on an *Agilent* HPLC. Column, eluent and retention times for HPLC analysis used for the determination of enantiomeric ratios are given below in the details of the relevant experiments.

**Optical rotations** were measured on a *JASCO* DIP-370 polarimeter.

**High-resolution mass spectra (HRMS)** was recorded on a VG Auto Spec-3000 spectrometer.

All reagents were either prepared according to known literatures or purchased from *Energy-chemical*, *TCI*, *Bide-pharmatech*, *Laajoo*, *Leyan*, *Adamas-beta*<sup>®</sup> and *Adamas-life*<sup>®</sup>.

## 2. Competitive reaction pathways and optimization reaction condition

### 2.1 Competitive reaction pathways

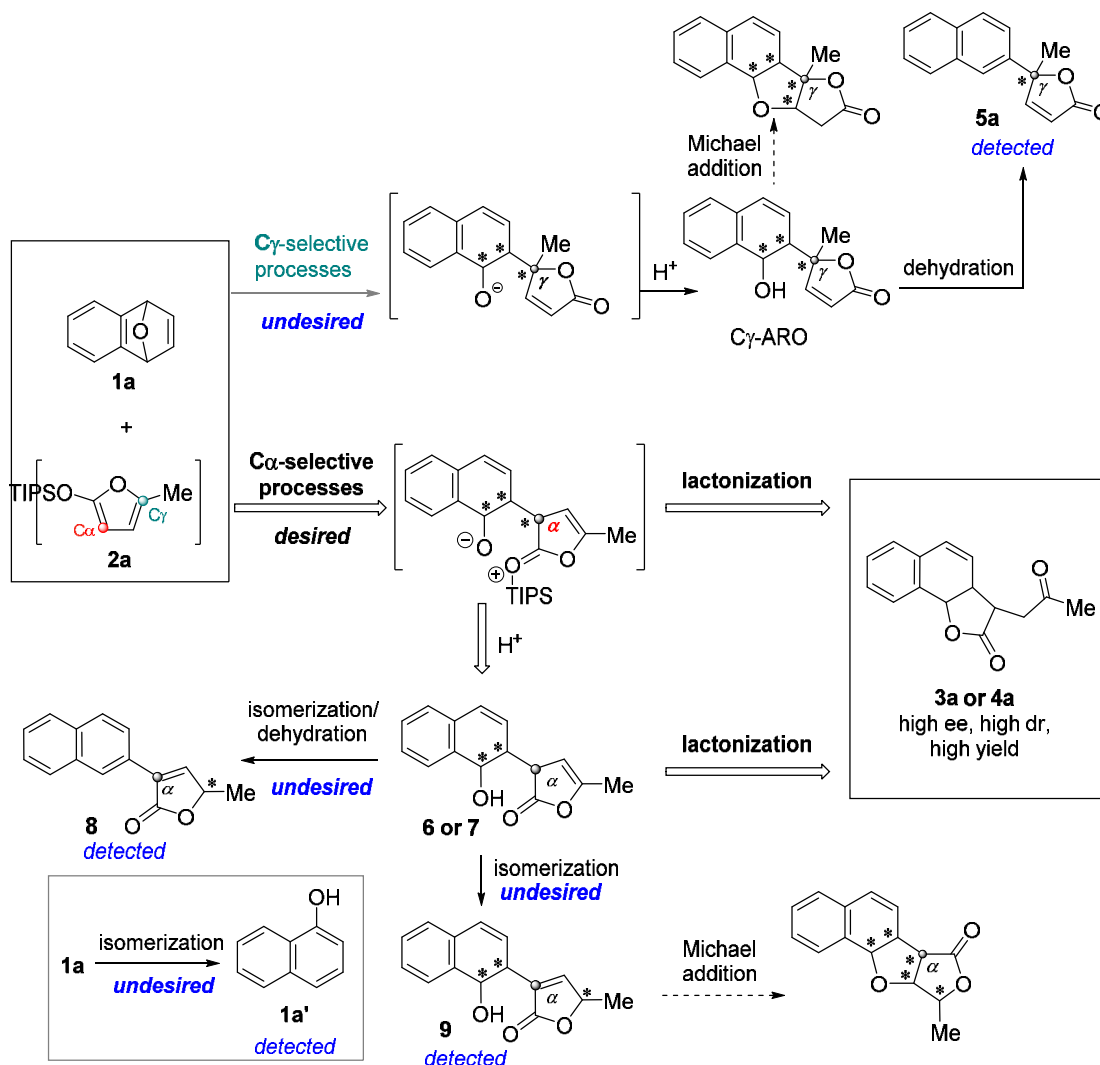

Figure S1. The complex competitive reactions and side products.

2-Silyoxyfurans and oxabenzonobornadienes exhibits rich reactivity, and through monitoring of the reaction system, we have discovered that this reaction involves complex competitive reactions and diverse side products. In addition to obtaining products **3a** and **4a**, we also detected several by-products. For example, the C $\gamma$  of 2-silyoxyfurans attacks the oxabenzonobornadienes, resulting in the dehydration product **5a**. The intermediate **6** or **7**, generated by the C $\alpha$  of 2-silyoxyfurans attacks the oxabenzonobornadienes. It not only could undergo lactonization to afford products **3a** or **4a**, but also could further isomerization/dehydration to yield product **8** and

isomerization to yield product **9**. Raw material **1a** can also be isomerized into **1a'**.

## 2.2 Optimization of reaction conditions

**Table S1. Initial exploration<sup>[a]</sup>**

| entry | L         | co-catalyst          | solvent (mL)                      | time (h) | product of <b>3a+4a</b>  |                   |                       | rr <sup>[c]</sup> (Ca/Cy) |
|-------|-----------|----------------------|-----------------------------------|----------|--------------------------|-------------------|-----------------------|---------------------------|
|       |           |                      |                                   |          | yield (%) <sup>[b]</sup> | dr <sup>[c]</sup> | ee (%) <sup>[d]</sup> |                           |
| 1     | <b>L1</b> | -                    | THF (1)                           | 3        | -                        | -                 | -                     | -                         |
| 2     | <b>L1</b> | -                    | THF (1)                           | 3        | 23                       | 2:1               | -89/-86               | 2:1                       |
| 3     | <b>L1</b> | Zn(OTf) <sub>2</sub> | THF (1)                           | 12       | 27                       | 2:1               | -89/-86               | 2:1                       |
| 4     | <b>L2</b> | Zn(OTf) <sub>2</sub> | THF (1)                           | 12       | 27                       | 5:1               | 87/86                 | 4:1                       |
| 5     | <b>L2</b> | Zn(OTf) <sub>2</sub> | PhCH <sub>3</sub> (1)             | 12       | 12                       | 3:1               | 87/85                 | 1:2                       |
| 6     | <b>L2</b> | Zn(OTf) <sub>2</sub> | PhCl (1)                          | 12       | 40                       | 1:1               | 87/82                 | 2:1                       |
| 7     | <b>L2</b> | Zn(OTf) <sub>2</sub> | DCE (1)                           | 12       | 69                       | 6:1               | 85/82                 | 3:1                       |
| 8     | <b>L2</b> | Zn(OTf) <sub>2</sub> | CHCl <sub>3</sub> (1)             | 12       | 47                       | 12:1              | 92/86                 | 15:1                      |
| 9     | <b>L2</b> | Zn(OTf) <sub>2</sub> | DCM (1)                           | 12       | 32                       | 3:1               | 85/83                 | 2:1                       |
| 10    | <b>L2</b> | Zn(OTf) <sub>2</sub> | DMF (1)                           | 12       | trace                    | -                 | -                     | -                         |
| 11    | <b>L2</b> | Zn(OTf) <sub>2</sub> | CH <sub>3</sub> CN (1)            | 12       | 43                       | 4:1               | 87/87                 | 6:1                       |
| 12    | <b>L2</b> | Zn(OTf) <sub>2</sub> | 1,4-dioxane (1)                   | 12       | 27                       | 2:1               | 80/82                 | 5:1                       |
| 13    | <b>L2</b> | Zn(OTf) <sub>2</sub> | DCE/CHCl <sub>3</sub> (1:1, 1 mL) | 12       | 45                       | 7:1               | 87/86                 | 12:1                      |
| 14    | <b>L2</b> | Zn(OTf) <sub>2</sub> | -                                 | 12       | 56                       | 9:1               | 87/85                 | 13:1                      |
| 15    | <b>L1</b> | Zn(OTf) <sub>2</sub> | -                                 | 12       | 50                       | 3:1               | -72/-68               | 12:1                      |
| 16    | <b>L3</b> | Zn(OTf) <sub>2</sub> | -                                 | 12       | 45                       | 5:1               | -71/-51               | 5:1                       |
| 17    | <b>L4</b> | Zn(OTf) <sub>2</sub> | DCE/CHCl <sub>3</sub>             | 12       | 35                       | 1:1               | -79/-84               | 2:1                       |
| 18    | <b>L5</b> | Zn(OTf) <sub>2</sub> | (1:1, 2 mL)                       | 12       | 56                       | 3:1               | -79/-74               | 7:1                       |
| 19    | <b>L6</b> | Zn(OTf) <sub>2</sub> | -                                 | 12       | 45                       | 11:1              | 85/65                 | >20:1                     |
| 20    | <b>L7</b> | Zn(OTf) <sub>2</sub> | -                                 | 12       | trace                    | -                 | -                     | -                         |
| 21    | <b>L8</b> | Zn(OTf) <sub>2</sub> | -                                 | 12       | 25                       | 2:1               | -83/-89               | 5:1                       |

|    |            |                      |    |    |     |         |     |
|----|------------|----------------------|----|----|-----|---------|-----|
| 22 | <b>L9</b>  | Zn(OTf) <sub>2</sub> | 12 | 31 | 4:1 | -91/-85 | 2:1 |
| 23 | <b>L10</b> | Zn(OTf) <sub>2</sub> | 12 | 39 | 2:1 | -84/-73 | 4:1 |

[a] According to the Lautens' procedure,<sup>1</sup> the reaction was conducted with **1a** (0.1 mmol), **2a** (0.3 mmol), Rh(COD)<sub>2</sub>OTf (5 mol%) and **L** (5.5 mol%) in solvent (1.0 mL) under argon atmosphere.

[b] Yield of isolated product refers to the total yield of **3a+4a**. [c] The dr value was determined by

<sup>1</sup>H-NMR spectroscopy and show **3a/4a**. [d] The ee value of **3a** or **4a** was determined by HPLC

analysis on a chiral stationary phase and show **3a/4a**, and their corresponding formula involved

were as following:  $ee((trans-trans)\text{-3a}) = \frac{[(R,R,R)\text{-3a}] - [(S,S,S)\text{-3a}]}{[(R,R,R)\text{-3a}] + [(S,S,S)\text{-3a}]}$ ,  $ee((trans-cis)\text{-4a}) =$

$\frac{[(S,R,R)\text{-4a}] - [(R,S,S)\text{-4a}]}{[(S,R,R)\text{-4a}] + [(R,S,S)\text{-4a}]}$ . [e] rr refers to the regioselective ratio of C $\alpha$ :C $\gamma$  between (**3a+4a**) and **5a**,<sup>2</sup>

which is determined by <sup>1</sup>H NMR spectroscopy. [f] Reaction time is 12 h. ND: not detected.

**Table S2.** Screening the rhodium salts, ratios of substrate and chiral ligand [a]

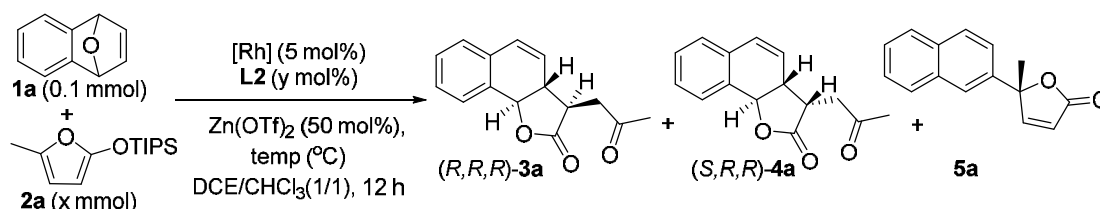

| entry | [Rh] salt                              | <b>2a</b><br>(x<br>mmol) | <b>L2</b><br>(y<br>mol%) | temp.<br>(°C) | Product of <b>3a+4a</b>     |                   |                          | rr <sup>[e]</sup><br>(C $\alpha$ :C $\gamma$ ) |
|-------|----------------------------------------|--------------------------|--------------------------|---------------|-----------------------------|-------------------|--------------------------|------------------------------------------------|
|       |                                        |                          |                          |               | yield<br>(%) <sup>[b]</sup> | dr <sup>[c]</sup> | ee<br>(%) <sup>[d]</sup> |                                                |
| 1     | Rh(COD) <sub>2</sub> OTf               | 3.0                      | 5.5                      | 45            | 56                          | 9:1               | 87/85                    | 13:1                                           |
| 2     | Rh(COD) <sub>2</sub> BF <sub>4</sub>   | 3.0                      | 5.5                      | 45            | 38                          | 9:1               | 83/75                    | 15:1                                           |
| 3     | Rh(NBD) <sub>2</sub> BF <sub>4</sub>   | 3.0                      | 5.5                      | 45            | 37                          | 13:1              | 82/89                    | >20:1                                          |
| 4     | [Rh(COD)CF <sub>3</sub> ] <sub>2</sub> | 3.0                      | 5.5                      | 45            | 53                          | 10:1              | 72/88                    | 14:1                                           |
| 5     | [Rh(COD)OMe] <sub>2</sub>              | 3.0                      | 5.5                      | 45            | 13                          | 6:1               | 79/56                    | 9:1                                            |
| 6     | [Rh(CO) <sub>2</sub> Cl] <sub>2</sub>  | 3.0                      | 5.5                      | 45            | 16                          | 5:1               | 58/43                    | 3:1                                            |
| 7     | [Rh(NBD)Cl] <sub>2</sub>               | 3.0                      | 5.5                      | 45            | 17                          | 5:1               | 77/75                    | 4:1                                            |
| 8     | [Rh(COD)OH] <sub>2</sub>               | 3.0                      | 5.5                      | 45            | 53                          | 14:1              | 76/78                    | 9:1                                            |
| 9     | Rh(COD) <sub>2</sub> OTf               | 1.0                      | 5.5                      | 45            | 32                          | 6:1               | 86/85                    | 4:1                                            |
| 10    | Rh(COD) <sub>2</sub> OTf               | 2.0                      | 5.5                      | 45            | 46                          | 6:1               | 87/85                    | 5:1                                            |
| 11    | Rh(COD) <sub>2</sub> OTf               | 4.0                      | 5.5                      | 45            | 57                          | 7:1               | 88/85                    | 10:1                                           |
| 12    | Rh(COD) <sub>2</sub> OTf               | 5.0                      | 5.5                      | 45            | 63                          | 12:1              | 87/86                    | 15:1                                           |
| 13    | Rh(COD) <sub>2</sub> OTf               | 6.0                      | 5.5                      | 45            | 57                          | 8:1               | 87/85                    | 12:1                                           |
| 14    | Rh(COD) <sub>2</sub> OTf               | 5.0                      | 11                       | 45            | 71                          | >20:1             | 92/-                     | >20:1                                          |
| 15    | Rh(COD) <sub>2</sub> OTf               | 5.0                      | 15                       | 45            | 68                          | >20:1             | 92/-                     | >20:1                                          |
| 16    | Rh(COD) <sub>2</sub> OTf               | 5.0                      | 11                       | RT            | 56                          | 10:1              | 91/-                     | >20:1                                          |
| 17    | Rh(COD) <sub>2</sub> OTf               | 5.0                      | 11                       | 40            | 68                          | >20:1             | 92/-                     | >20:1                                          |
| 18    | Rh(COD) <sub>2</sub> OTf               | 5.0                      | 11                       | 50            | 67                          | >20:1             | 91/-                     | >20:1                                          |
| 19    | Rh(COD) <sub>2</sub> OTf               | 5.0                      | 11                       | 60            | 60                          | >20:1             | 90/-                     | >20:1                                          |
| 20    | Rh(COD) <sub>2</sub> OTf               | 5.0                      | 11                       | 70            | 50                          | >20:1             | 87/-                     | >20:1                                          |

[a] General reaction conditions: **1a** (0.1 mmol), **2a** (x mmol), Zn(OTf)<sub>2</sub> (50 mol%), [Rh] salt (5

mol%) and **L2** (*y* mol%) in the mixture solvent of DCE (1.0 mL) and CHCl<sub>3</sub> (1.0 mL) under argon atmosphere for 12 h. [b] Yield of isolated product refers to the total yield of **3a+4a**. [c] The dr value was determined by <sup>1</sup>H-NMR spectroscopy and show **3a/4a**. [d] The ee value of **3a** or **4a** was determined by HPLC analysis on a chiral stationary phase and show **3a/4a**. [e] rr refers to the regioselective ratio of C $\alpha$ :C $\gamma$  between (**3a+4a**) and **5a**, which is determined by <sup>1</sup>H NMR spectroscopy.

**Table S3.** Screening Lewis acid co-catalysts and additives <sup>[a]</sup>

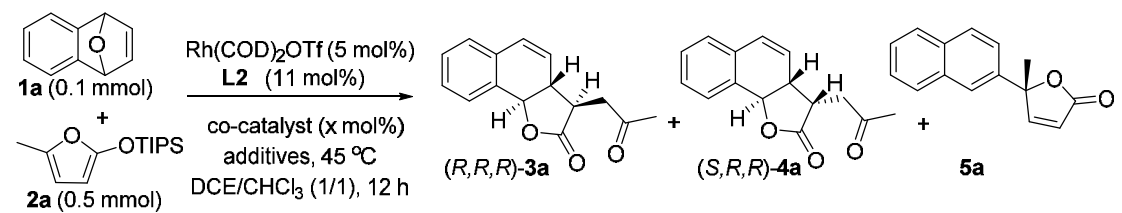

| entry | co-catalyst<br>(x mol%)    | additives                     | product of <b>3a+4a</b>     |                   |                          | rr <sup>[e]</sup><br>(C $\alpha$ /C $\gamma$ ) |
|-------|----------------------------|-------------------------------|-----------------------------|-------------------|--------------------------|------------------------------------------------|
|       |                            |                               | yield<br>(%) <sup>[b]</sup> | dr <sup>[c]</sup> | ee<br>(%) <sup>[d]</sup> |                                                |
| 1     | Zn(OTf) <sub>2</sub> (0)   | none                          | trace                       | -                 | -                        | -                                              |
| 2     | Zn(OTf) <sub>2</sub> (10)  | none                          | 46                          | 2.3:1             | 91/89                    | >20:1                                          |
| 3     | Zn(OTf) <sub>2</sub> (20)  | none                          | 52                          | 3.7:1             | 92/91                    | >20:1                                          |
| 4     | Zn(OTf) <sub>2</sub> (30)  | none                          | 60                          | 8:1               | 92/91                    | >20:1                                          |
| 5     | Zn(OTf) <sub>2</sub> (40)  | none                          | 65                          | 13:1              | 92/90                    | >20:1                                          |
| 6     | Zn(OTf) <sub>2</sub> (50)  | none                          | 71                          | >20:1             | 92/-                     | >20:1                                          |
| 7     | Zn(OTf) <sub>2</sub> (80)  | none                          | 69                          | 10:1              | 91/90                    | >20:1                                          |
| 8     | Zn(OTf) <sub>2</sub> (100) | none                          | 63                          | 9:1               | 92/90                    | >20:1                                          |
| 9     | Zn(OTf) <sub>2</sub> (50)  | ZnF <sub>2</sub> (2.0 equiv)  | 39                          | 4.6:1             | 87/98                    | >20:1                                          |
| 10    | Zn(OTf) <sub>2</sub> (50)  | NaF (2.0 equiv)               | 37                          | 4.3:1             | 86/98                    | >20:1                                          |
| 11    | Zn(OTf) <sub>2</sub> (50)  | NH <sub>4</sub> F (2.0 equiv) | 80                          | 7:1               | 86/98                    | >20:1                                          |
| 12    | Zn(OAc) <sub>2</sub> (50)  | none                          | ND                          | -                 | -                        | -                                              |
| 13    | KOTf (50)                  | none                          | 37                          | 1:13              | 76/59                    | >20:1                                          |
| 14    | Bi(OTf) <sub>3</sub> (50)  | none                          | 18                          | 12:1              | 93/95                    | 4:1                                            |
| 15    | Ca(OTf) <sub>2</sub> (50)  | none                          | 63                          | 1:2.3             | 82/78                    | >20:1                                          |
| 16    | Cu(OTf) <sub>2</sub> (50)  | none                          | 21                          | 4.2:1             | 88/83                    | 3:1                                            |
| 17    | Sn(OTf) <sub>2</sub> (50)  | none                          | 40                          | 1.4:1             | 93/91                    | >20:1                                          |
| 18    | Sc(OTf) <sub>3</sub> (50)  | none                          | 27                          | 8:1               | 95/89                    | >20:1                                          |
| 19    | Mn(OTf) <sub>2</sub> (50)  | none                          | 80                          | 1.5:1             | 85/80                    | >20:1                                          |
| 20    | Co(OTf) <sub>2</sub> (50)  | none                          | 73                          | 7:1               | 90/95                    | >20:1                                          |
| 21    | Ni(OTf) <sub>2</sub> (50)  | none                          | 74                          | 1:1.4             | 90/88                    | >20:1                                          |
| 22    | Mg(OTf) <sub>2</sub> (50)  | none                          | 77                          | 3.5:1             | 85/77                    | >20:1                                          |
| 23    | Ga(OTf) <sub>3</sub> (50)  | none                          | 48                          | >20:1             | 94/92                    | 4:1                                            |
| 24    | LiOTf (50)                 | none                          | 50                          | 1:1.5             | 75/60                    | >20:1                                          |
| 25    | ZnF <sub>2</sub> (50)      | none                          | NR                          | -                 | -                        | -                                              |
| 26    | ZnCl <sub>2</sub> (50)     | none                          | 20                          | 2:1               | 84/71                    | >20:1                                          |

| entry | co-catalyst<br>(x mol%)   | additives | product of <b>3a+4a</b>     |                   |                          | rr <sup>[e]</sup><br>(C $\alpha$ /C $\gamma$ ) |
|-------|---------------------------|-----------|-----------------------------|-------------------|--------------------------|------------------------------------------------|
|       |                           |           | yield<br>(%) <sup>[b]</sup> | dr <sup>[c]</sup> | ee<br>(%) <sup>[d]</sup> |                                                |
| 27    | ZnI <sub>2</sub> (50)     | none      | 32                          | 3:1               | 39/40                    | 5:1                                            |
| 28    | Al(OTf) <sub>3</sub> (50) | none      | 53                          | >20:1             | 94/93                    | 9:1                                            |

[a] General reaction conditions: **1a** (0.1 mmol), **2a** (0.5 mmol), co-catalyst (50 mol%), Rh(COD)<sub>2</sub>OTf (5 mol%) and **L2** (11 mol%) in the mixture solvent of DCE (1.0 mL) and CHCl<sub>3</sub> (1.0 mL) under argon atmosphere at 45 °C for 12 h. [b] Yield of isolated product refers to the total yield of **3a+4a**. [c] The dr value was determined by <sup>1</sup>H-NMR spectroscopy and show **3a/4a**. [d] The ee value of **3a** or **4a** was determined by HPLC analysis on a chiral stationary phase and show **3a/4a**. [e] rr refers to the regioselective ratio of C $\alpha$ :C $\gamma$  between (**3a+4a**) and **5a**, which is determined by <sup>1</sup>H NMR spectroscopy.

**Table S4.** Screening the other unstabilized nucleophiles <sup>[a]</sup>

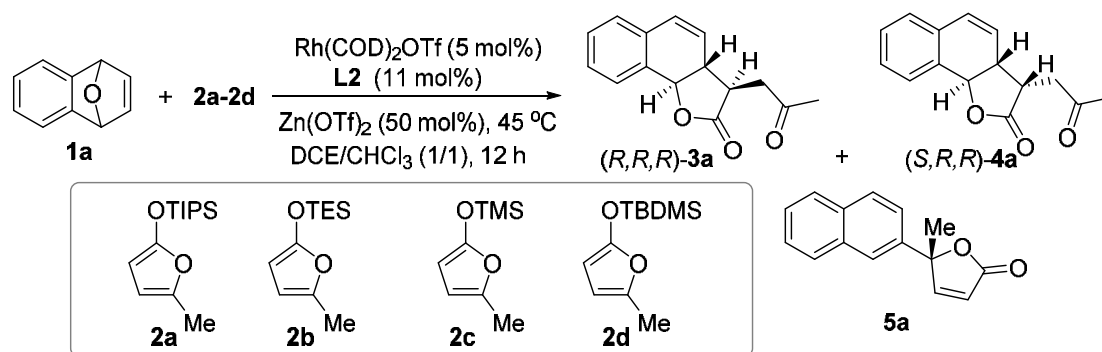

| entry | nucleophiles | product of <b>3a+4a</b>  |                   |                       | rr <sup>[e]</sup><br>(C $\alpha$ /C $\gamma$ ) | yield of C $\gamma$ -site<br>product (%) |
|-------|--------------|--------------------------|-------------------|-----------------------|------------------------------------------------|------------------------------------------|
|       |              | yield (%) <sup>[b]</sup> | dr <sup>[c]</sup> | ee (%) <sup>[d]</sup> |                                                |                                          |
| 1     | <b>2a</b>    | 71                       | >20:1             | 92/-                  | >20:1                                          | -                                        |
| 2     | <b>2b</b>    | trace                    | -                 | -                     | -                                              | -                                        |
| 3     | <b>2c</b>    | trace                    | -                 | -                     | -                                              | -                                        |
| 4     | <b>2d</b>    | 65                       | 2:1               | 80/91                 | 11:1                                           | 6 ( <b>5a</b> )                          |

[a] General reaction conditions: **1a** (0.1 mmol), **2** (0.5 mmol), Zn(OTf)<sub>2</sub> (50 mol%), Rh(COD)<sub>2</sub>OTf (5 mol%) and **L2** (11 mol%) in DCE (1.0 mL)+CHCl<sub>3</sub> (1.0 mL) under argon atmosphere at 45 °C for 12 h. [b] Yield of isolated product refers to the total yield of **3a+4a**. [c] The dr value was determined by <sup>1</sup>H-NMR spectroscopy and show **3a/4a**. [d] The ee value of **3a** or **4a** was determined by HPLC analysis on a chiral stationary phase and show **3a/4a**. [e] rr refers to the regioselective ratio of C $\alpha$ :C $\gamma$  between (**3a+4a**) and **5a**, which is determined by <sup>1</sup>H NMR spectroscopy.

**Table S5.** Screening the reaction time <sup>[a]</sup>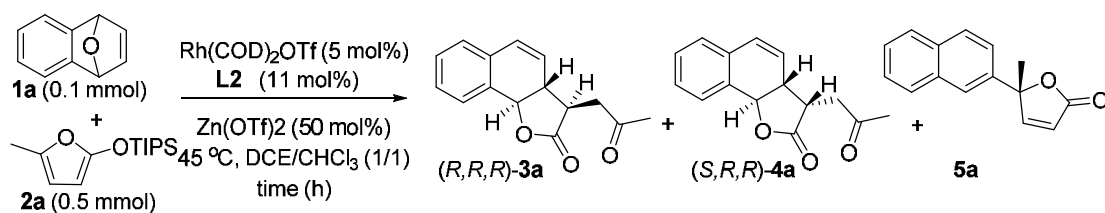

| entry | time (h) | product of <b>3a+4a</b>  |                   |                       | $\text{rr}^{[e]}$<br>(Ca/C $\gamma$ ) |
|-------|----------|--------------------------|-------------------|-----------------------|---------------------------------------|
|       |          | yield (%) <sup>[b]</sup> | $\text{dr}^{[c]}$ | ee (%) <sup>[d]</sup> |                                       |
| 1     | 0.5      | 38                       | >20:1             | 94/-                  | >20:1                                 |
| 2     | 1        | 63                       | >20:1             | 92/-                  | >20:1                                 |
| 3     | 2        | 69                       | >20:1             | 92/-                  | >20:1                                 |
| 4     | 3        | 70                       | >20:1             | 92/-                  | >20:1                                 |
| 5     | 4        | 71                       | >20:1             | 92/-                  | >20:1                                 |
| 6     | 5        | 71                       | >20:1             | 92/-                  | >20:1                                 |
| 7     | 12       | 71                       | >20:1             | 92/-                  | >20:1                                 |

[a] General reaction conditions: **1a** (0.1 mmol), **2a** (0.5 mmol),  $\text{Zn}(\text{OTf})_2$  (50 mol%),  $\text{Rh}(\text{COD})_2\text{OTf}$  (5 mol%) and **L2** (11 mol%) in  $\text{DCE}$  (1.0 mL)+ $\text{CHCl}_3$  (1.0 mL) under argon atmosphere at 45 °C. [b] Yield of isolated product refers to the total yield of **3a+4a**. [c] The  $\text{dr}$  value was determined by  $^1\text{H-NMR}$  spectroscopy and show **3a/4a**. [d] The ee value of **3a** or **4a** was determined by HPLC analysis on a chiral stationary phase and show **3a/4a**. [e]  $\text{rr}$  refers to the regioselective ratio of Ca:C $\gamma$  between (**3a+4a**) and **5a**, which is determined by  $^1\text{H NMR}$  spectroscopy.

**Table S6.** Screening the combined co-catalysts and additives for **(S,R,R)-4a** <sup>[a]</sup>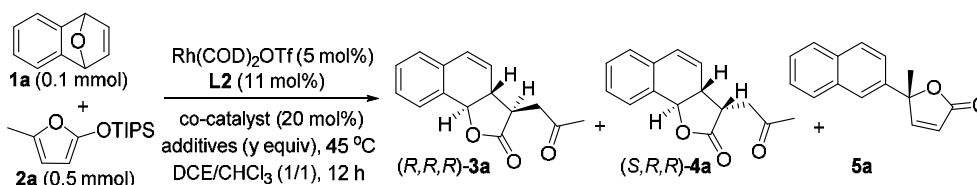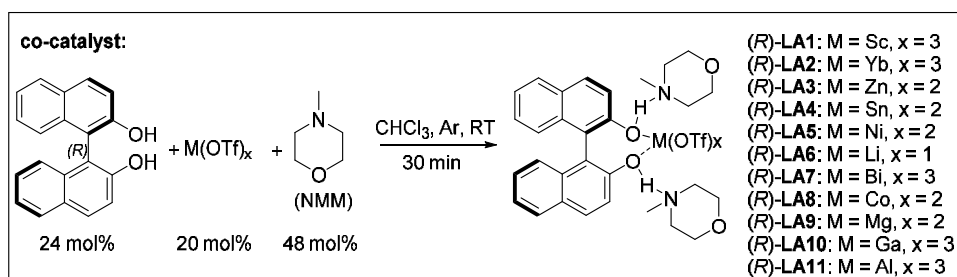

| entry | co-catalyst                         | additives<br>(y equiv) | product of <b>3a+4a</b>     |                   |                          | $\text{rr}^{[e]}$<br>(Ca/C $\gamma$ ) |
|-------|-------------------------------------|------------------------|-----------------------------|-------------------|--------------------------|---------------------------------------|
|       |                                     |                        | yield<br>(%) <sup>[b]</sup> | $\text{dr}^{[c]}$ | ee<br>(%) <sup>[d]</sup> |                                       |
| 1     | KOTf                                | none                   | <10%                        | -                 | -                        | -                                     |
| 2     | $\text{Ca}(\text{OTf})_2$           | none                   | <10%                        | -                 | -                        | -                                     |
| 3     | <b>(R)-LA1</b> ( $\text{Sc}^{3+}$ ) | none                   | 77                          | 1:11              | 79/97                    | 9:1                                   |

| entry | co-catalyst                                   | additives<br>(y equiv) | product of <b>3a+4a</b>     |                   |                          | rr <sup>[e]</sup><br>(C $\alpha$ /C $\gamma$ ) |
|-------|-----------------------------------------------|------------------------|-----------------------------|-------------------|--------------------------|------------------------------------------------|
|       |                                               |                        | yield<br>(%) <sup>[b]</sup> | dr <sup>[c]</sup> | ee<br>(%) <sup>[d]</sup> |                                                |
| 4     | ( <i>R</i> )- <b>LA2</b> (Yb <sup>3+</sup> )  | none                   | 37                          | 1:4.6             | 92/93                    | >20:1                                          |
| 5     | ( <i>R</i> )- <b>LA3</b> (Zn <sup>2+</sup> )  | none                   | 50                          | 1:2               | 96/97                    | >20:1                                          |
| 6     | ( <i>R</i> )- <b>LA4</b> (Sn <sup>2+</sup> )  | none                   | 45                          | <1:20             | -/93                     | >20:1                                          |
| 7     | ( <i>R</i> )- <b>LA5</b> (Ni <sup>2+</sup> )  | none                   | <10%                        | -                 | -                        | -                                              |
| 8     | ( <i>R</i> )- <b>LA6</b> (Li <sup>+</sup> )   | none                   | <10%                        | -                 | -                        | -                                              |
| 9     | ( <i>R</i> )- <b>LA7</b> (Bi <sup>3+</sup> )  | none                   | 28                          | <1:20             | -/93                     | >20:1                                          |
| 10    | ( <i>R</i> )- <b>LA8</b> (Ni <sup>2+</sup> )  | none                   | trace                       | -                 | -                        | -                                              |
| 11    | ( <i>R</i> )- <b>LA9</b> (Mg <sup>2+</sup> )  | none                   | 32                          | <1:20             | -/90                     | >20:1                                          |
| 12    | ( <i>R</i> )- <b>LA10</b> (Ga <sup>3+</sup> ) | none                   | 20                          | <1:20             | -/92                     | >20:1                                          |
| 13    | ( <i>R</i> )- <b>LA11</b> (Al <sup>3+</sup> ) | none                   | 18                          | <1:20             | -/93                     | >20:1                                          |
| 14    | ( <i>R</i> )- <b>LA4</b> (Sn <sup>2+</sup> )  | none                   | 45                          | <1:20             | -/93                     | >20:1                                          |
| 15    | ( <i>R</i> )- <b>LA4</b> (Sn <sup>2+</sup> )  | <i>i</i> -PrOH (2.0)   | 61                          | <1:20             | -/91                     | >20:1                                          |
| 16    | ( <i>R</i> )- <b>LA4</b> (Sn <sup>2+</sup> )  | H <sub>2</sub> O (2.0) | 44                          | <1:20             | -/85                     | >20:1                                          |
| 147   | ( <i>R</i> )- <b>LA4</b> (Sn <sup>2+</sup> )  | <i>t</i> -BuOH (2.0)   | 67                          | <1:20             | -/89                     | >20:1                                          |
| 18    | ( <i>R</i> )- <b>LA4</b> (Sn <sup>2+</sup> )  | HFIP (2.0)             | 65                          | <1:20             | -/88                     | >20:1                                          |
| 19    | ( <i>R</i> )- <b>LA4</b> (Sn <sup>2+</sup> )  | TFE (2.0)              | 68                          | <1:20             | -/88                     | >20:1                                          |
| 20    | ( <i>R</i> )- <b>LA4</b> (Sn <sup>2+</sup> )  | TMSOH (2.0)            | 51                          | <1:20             | -/87                     | >20:1                                          |
| 21    | ( <i>R</i> )- <b>LA4</b> (Sn <sup>2+</sup> )  | TFE (1.0)              | 37                          | <1:20             | -/89                     | >20:1                                          |
| 22    | ( <i>R</i> )- <b>LA4</b> (Sn <sup>2+</sup> )  | TFE (2.0)              | 68                          | <1:20             | -/88                     | >20:1                                          |
| 23    | ( <i>R</i> )- <b>LA4</b> (Sn <sup>2+</sup> )  | TFE (3.5)              | 73                          | <1:20             | -/89                     | >20:1                                          |
| 24    | ( <i>R</i> )- <b>LA4</b> (Sn <sup>2+</sup> )  | TFE (5.0)              | 62                          | <1:20             | -/85                     | >20:1                                          |
| 25    | ( <i>R</i> )- <b>LA4</b> (Sn <sup>2+</sup> )  | TFE (10.0)             | 67                          | <1:20             | -/79                     | >20:1                                          |
| 26    | ( <i>R</i> )- <b>LA4</b> (Sn <sup>2+</sup> )  | TFE (20.0)             | 66                          | <1:20             | -/69                     | >20:1                                          |
| 27    | ( <i>R</i> )- <b>LA1</b> (Sc <sup>3+</sup> )  | TFE (3.5)              | 83                          | 1:13              | 80/97                    | >20:1                                          |
| 28    | ( <i>R</i> )- <b>LA2</b> (Yb <sup>3+</sup> )  | TFE (3.5)              | 62                          | 1:7               | 92/93                    | >20:1                                          |

[a] General reaction conditions: **1a** (0.1 mmol), **2a** (0.5 mmol), Rh(COD)<sub>2</sub>OTf (5 mol%), **L2** (11 mol%), cocatalyst (based on 20 mol% Lewis acid salt, in CHCl<sub>3</sub>) in the solvent of DCE (1.0 mL) under argon atmosphere at 45 °C for 12 h. The solution of cocatalyst was prepared freshly in a separate reaction tube with the indicated Lewis acid (0.02 mmol), (*R*)-BINOL (0.024 mmol) and NMM (0.048 mmol) in CHCl<sub>3</sub> (1.0 mL) at RT for 30 min. [b] Yield of isolated product refers to the total yield of **3a+4a**. [c] The dr value was determined by <sup>1</sup>H-NMR spectroscopy and show **3a/4a**. [d] The ee value of **3a** or **4a** was determined by HPLC analysis on a chiral stationary phase and show **3a/4a**. [e] rr refers to the regioselective ratio of C $\alpha$ :C $\gamma$  between (**3a+4a**) and **5a**, which is determined by <sup>1</sup>H NMR spectroscopy. HFIP: (CF<sub>3</sub>)<sub>2</sub>CHOH. TFE: CF<sub>3</sub>CH<sub>2</sub>OH. TMSOH: (Me)<sub>3</sub>SiOH.

**Table S7.** Screening the solvents for (*S,R,R*)-**4a** [a]

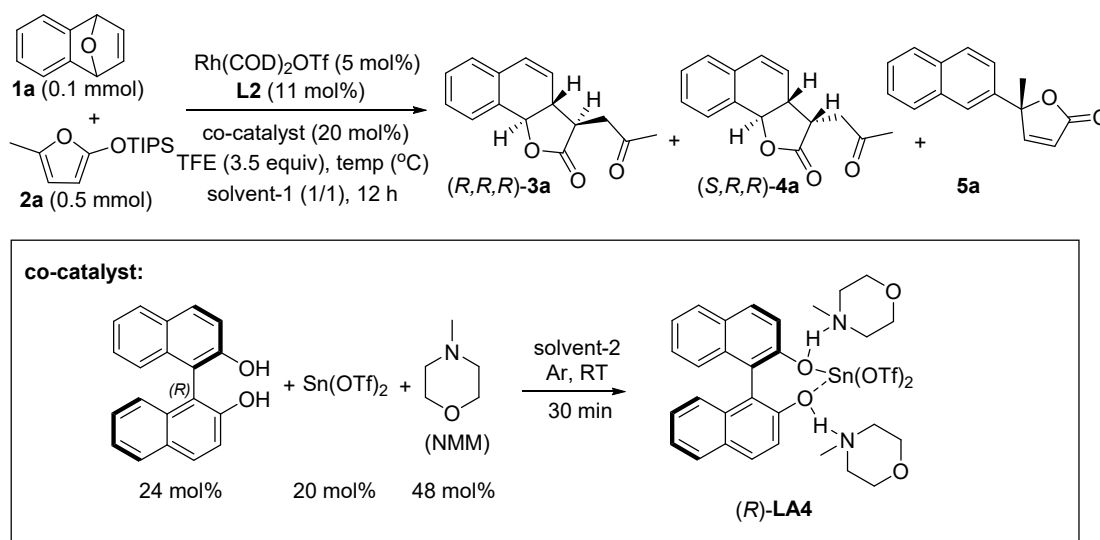

| entry | solvent-1<br>[solvent-2]               | temp. (°C) | product of <b>3a+4a</b>     |                   |                          | rr <sup>[e]</sup><br>(C $\alpha$ /C $\gamma$ ) |
|-------|----------------------------------------|------------|-----------------------------|-------------------|--------------------------|------------------------------------------------|
|       |                                        |            | yield<br>(%) <sup>[b]</sup> | dr <sup>[c]</sup> | ee<br>(%) <sup>[d]</sup> |                                                |
| 1     | DCE [CHCl <sub>3</sub> ]               | 45         | 73                          | <1:20             | -/89                     | >20:1                                          |
| 2     | DCE [DCE]                              | 45         | 46                          | <1:20             | -/68                     | >20:1                                          |
| 3     | CHCl <sub>3</sub> [CHCl <sub>3</sub> ] | 45         | 76                          | <1:20             | -/95                     | >20:1                                          |
| 4     | CHCl <sub>3</sub> [CHCl <sub>3</sub> ] | RT         | NR                          | -                 | -                        | -                                              |
| 5     | CHCl <sub>3</sub> [CHCl <sub>3</sub> ] | 40         | 70                          | <1:20             | -/95                     | >20:1                                          |
| 6     | CHCl <sub>3</sub> [CHCl <sub>3</sub> ] | 50         | 72                          | <1:20             | -/95                     | >20:1                                          |
| 7     | CHCl <sub>3</sub> [CHCl <sub>3</sub> ] | 70         | 54                          | 1:10              | 95/94                    | >20:1                                          |
| 8     | CHCl <sub>3</sub> [CHCl <sub>3</sub> ] | 90         | 31                          | 1:5               | 95/93                    | >20:1                                          |

[a] General reaction conditions: **1a** (0.1 mmol), **2a** (0.5 mmol), Rh(COD)<sub>2</sub>OTf (5 mol%), **L2** (11 mol%), (*R*)-**LA4** (based on 20 mol% Sn(OTf)<sub>2</sub>, in solvent-2) and TFE (3.5 equiv) in the indicated solvent-1 under argon atmosphere at 45 °C for 12 h. The solution of cocatalyst (*R*)-**LA4** was prepared freshly in a separate reaction tube with the Sn(OTf)<sub>2</sub> (0.02 mmol), (*R*)-BINOL (0.024 mmol) and NMM (0.048 mmol) in the indicated solvent-2 (1.0 mL) at RT for 30 min. [b] Yield of isolated product refers to the total yield of **3a+4a**. [c] The dr value was determined by <sup>1</sup>H-NMR spectroscopy and show **3a/4a**. [d] The ee value of **3a** or **4a** was determined by HPLC analysis on a chiral stationary phase and show **3a/4a**. [e] rr refers to the regioselective ratio of C $\alpha$ :C $\gamma$  between (**3a+4a**) and **5a**, which is determined by <sup>1</sup>H NMR spectroscopy. NR: no reaction, both starting materials didn't react at RT.

**Table S8.** The influence of combined catalysts for (*S,R,R*)-**4a** <sup>[a]</sup>

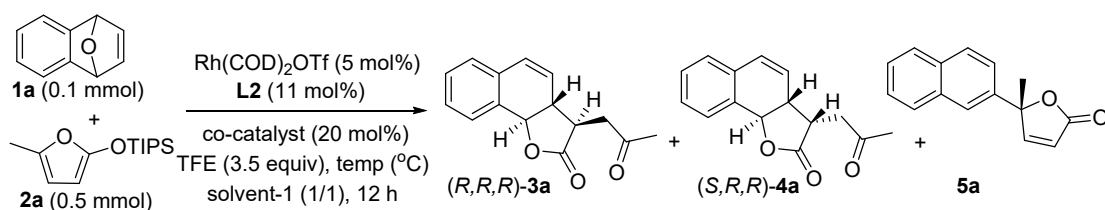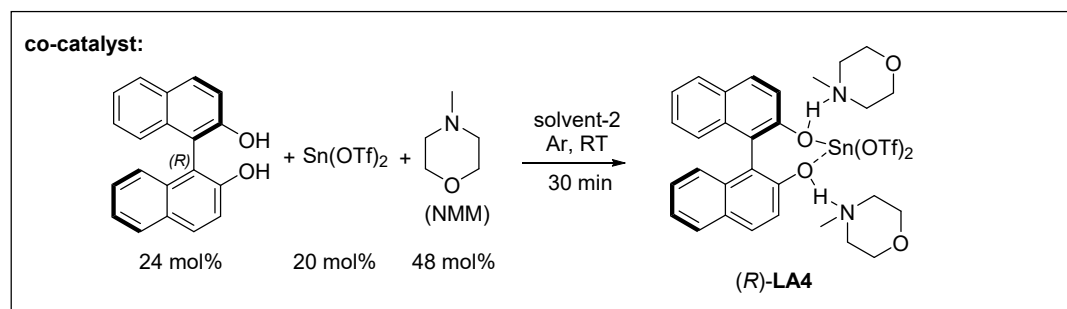

| entry | co-catalyst<br>(x:y:z)                                      | additives | product of <b>3a+4a</b>     |                   |                          | rr <sup>[e]</sup><br>(C <sub>α</sub> /C <sub>γ</sub> ) |
|-------|-------------------------------------------------------------|-----------|-----------------------------|-------------------|--------------------------|--------------------------------------------------------|
|       |                                                             |           | yield<br>(%) <sup>[b]</sup> | dr <sup>[c]</sup> | ee<br>(%) <sup>[d]</sup> |                                                        |
| 1     | <b>(R)-LA4</b>                                              | TFE       | 76                          | <1:20             | -/95                     | >20:1                                                  |
| 2     | <b>(±)-LA4</b>                                              | TFE       | 71                          | <1:20             | -/95                     | >20:1                                                  |
| 3     | <b>(S)-LA4</b>                                              | TFE       | 69                          | <1:20             | -/95                     | >20:1                                                  |
| 4     | <b>(R)-BINOL</b> :Sn(OTf) <sub>2</sub> :<br>NMM = 1.2:0:2.4 | TFE       | trace                       | -                 | -                        | >20:1                                                  |
| 5     | <b>(R)-BINOL</b> :Sn(OTf) <sub>2</sub> :<br>NMM = 0:1:2.4   | TFE       | 73                          | 1:9               | 99/94                    | >20:1                                                  |
| 6     | <b>(R)-BINOL</b> :Sn(OTf) <sub>2</sub> :<br>NMM = 1.2:1:0   | TFE       | 61                          | 1:1.4             | 97/93                    | >20:1                                                  |
| 7     | <b>(R)-BINOL</b> :Sn(OTf) <sub>2</sub> :<br>NMM = 0:1:2.4   | none      | 73                          | 1:13              | 99/94                    | >20:1                                                  |
| 8     | Sn(OTf) <sub>2</sub>                                        | TFE       | 68                          | 1:1.5             | 93/91                    | -                                                      |
| 9     | <b>(R)-BINOL</b>                                            | TFE       | trace                       | -                 | -                        | -                                                      |
| 10    | NMM                                                         | TFE       | trace                       | -                 | -                        | -                                                      |
| 11    | -                                                           | TFE       | trace                       | -                 | -                        | -                                                      |

[a] General reaction conditions: **1a** (0.1 mmol), **2a** (0.5 mmol), Rh(COD)<sub>2</sub>OTf (5 mol%), **L2** (11 mol%), cocatalyst (based on 20 mol% Sn(OTf)<sub>2</sub>, in CHCl<sub>3</sub>) and TFE (3.5 equiv) in the solvent of CHCl<sub>3</sub> (1.0 mL) under argon atmosphere for 12 h. The solution of cocatalyst **(R)-LA4** was prepared freshly in a separate reaction tube with the Sn(OTf)<sub>2</sub> (x mmol), BINOL (y mmol) and NMM (z mmol) in CHCl<sub>3</sub> (1.0 mL) at RT for 30 min. [b] Yield of isolated product refers to the total yield of **3a+4a**. [c] The dr value was determined by <sup>1</sup>H-NMR spectroscopy and show **3a/4a**. [d] The ee value of **3a** or **4a** was determined by HPLC analysis on a chiral stationary phase and show **3a/4a**. [e] rr refers to the regioselective ratio of C<sub>α</sub>:C<sub>γ</sub> between (**3a+4a**) and **5a**, which is determined by <sup>1</sup>H NMR spectroscopy.

### 3. General procedures for catalytic asymmetric [3+2]-annulation

#### 3.1 General procedure A for the synthesis of (*R,R,R*)-**3**

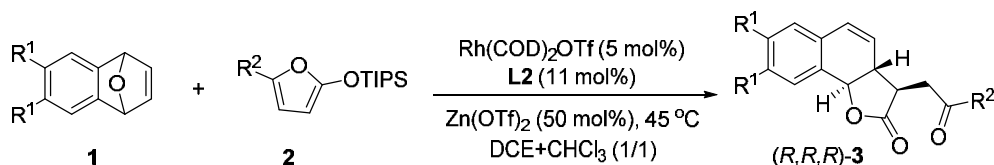

Under an argon atmosphere, Rh(COD)<sub>2</sub>OTf (2.34 mg, 5.0 mol%) and **L2** (10.3 mg, 11 mol%) were dissolved in the mixture solvents of DCE (1.0 mL) and CHCl<sub>3</sub> (1.0 mL) and the resulting solution was stirred for 30 min at RT. Subsequently, Zn(OTf)<sub>2</sub> (18.2 mg, 50 mol%), **1** (0.1 mmol) and **2** (0.5 mmol) were added. The reaction mixture was stirred under argon atmosphere at 45 °C for 4-12 h. After reaction completion, the solvent was evaporated under reduced pressure. The residue was purified by flash column chromatography on silica gel (petroleum ether/ ethyl acetate = 10:1) to afford (*R,R,R*)-**3**.

**Note:** All *racemic* products **3** were synthesized in the presence of the *racemic* ligands (**L2** and *ent*-**L2** (1:1)). Due to the error in the preparation of *racemic* ligand, some *racemic* products mixture have a low ee values but below 5%.

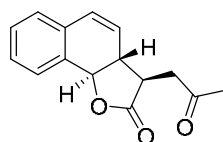

(*R,R,R*)-**3a**

According to the general procedure A: White solid, 17.2 mg, 71% yield, >20:1 dr, 92% ee;

<sup>1</sup>H NMR (600 MHz, CDCl<sub>3</sub>) δ 7.47-7.41 (m, 1H), 7.33-7.28 (m, 2H), 7.21-7.16 (m, 1H), 6.57 (dd, *J* = 9.5, 3.0 Hz, 1H), 6.30 (dd, *J* = 9.5, 2.3 Hz, 1H), 5.04 (d, *J* = 14.4 Hz, 1H), 3.28-3.14 (m, 2H), 2.75-2.59 (m, 2H), 2.25 (s, 3H);

<sup>13</sup>C NMR (101 MHz, CDCl<sub>3</sub>) δ 205.2, 176.8, 134.4, 132.8, 131.7, 128.2, 127.8, 127.0, 124.1, 123.9, 79.1, 46.7, 42.7, 40.4, 30.1;

HRMS (ESI) *m/z*: [M+H]<sup>+</sup> calculated for C<sub>15</sub>H<sub>15</sub>O<sub>3</sub><sup>+</sup>: 243.1016, found: 243.1016;

HPLC analysis: Daicel CHIRALCEL<sup>®</sup> OD-H, *n*-hexane/*i*-PrOH = 85/15, flow rate = 1.0 mL/min, λ = 254 nm, retention time: *t*<sub>major</sub> = 12.8 min, *t*<sub>minor</sub> = 15.6 min;

[α]<sub>D</sub><sup>25</sup> = +48.3 (c = 0.1, CHCl<sub>3</sub>).

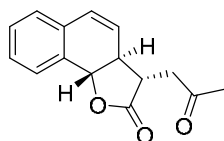

(*S,S,S*)-**3a**

According to the general procedure A, *ent*-**L2** was used as the ligand. White solid, 19.3 mg, 80% yield, 10:1 dr, 87% ee;

Spectral data were in agreement with those of the enantiomer reported above;

**HRMS (ESI) m/z:**  $[M+H]^+$  calculated for  $C_{15}H_{15}O_3^+$ : 243.1016, found: 243.1017;

**HPLC analysis:** Daicel CHIRALCEL<sup>®</sup> OD-H, *n*-hexane/*i*-PrOH = 85/15, flow rate = 1.0 mL/min,  $\lambda$  = 254 nm, retention time:  $t_{\text{minor}}$  = 13.0 min,  $t_{\text{major}}$  = 15.2 min;

$[\alpha]_D^{25}$  = -30.5 ( $c$  = 0.1,  $CHCl_3$ ).

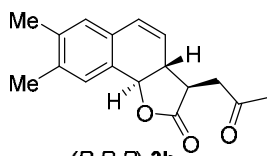

(*R,R,R*)-**3b**

According to the general procedure A: White solid, 19.7 mg, 73% yield, 11:1 dr, 90% ee;

**<sup>1</sup>H NMR (600 MHz,  $CDCl_3$ )**  $\delta$  7.21 (s, 1H), 6.97 (s, 1H), 6.51 (dd,  $J$  = 9.5, 3.0 Hz, 1H), 6.21 (dd,  $J$  = 9.5, 2.2 Hz, 1H), 4.98 (d,  $J$  = 14.3 Hz, 1H), 3.25-3.15 (m, 2H), 2.69-2.57 (m, 2H), 2.28 (s, 3H), 2.25 (d, 6H);

**<sup>13</sup>C NMR (151 MHz,  $CDCl_3$ )**  $\delta$  205.3, 177.8, 136.6, 136.0, 131.6, 130.0, 129.5, 128.4, 124.8, 123.0, 80.8, 47.5, 42.8, 40.7, 30.1, 19.7, 19.5;

**HRMS (ESI) m/z:**  $[M+H]^+$  calculated for  $C_{17}H_{19}O_3^+$ : 271.1329, found: 271.1324;

**HPLC analysis:** Daicel CHIRALCEL<sup>®</sup> OD-H, *n*-hexane/*i*-PrOH = 90/10, flow rate = 1.0 mL/min,  $\lambda$  = 254 nm, retention time:  $t_{\text{major}}$  = 15.0 min,  $t_{\text{minor}}$  = 17.5 min;

$[\alpha]_D^{25}$  = +6.5 ( $c$  = 0.1,  $CHCl_3$ ).

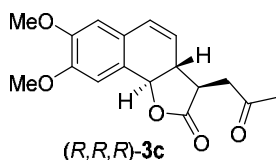

(*R,R,R*)-**3c**

According to the general procedure A: White solid, 21.7 mg, 72% yield, 7:1 rr, 10:1 dr, 89% ee;

**<sup>1</sup>H NMR (400 MHz, CDCl<sub>3</sub>)** δ 7.00 (s, 1H), 6.74 (s, 1H), 6.48 (dd, *J* = 9.5, 3.0 Hz, 1H), 6.19 (dd, *J* = 9.5, 2.2 Hz, 1H), 4.97 (d, *J* = 14.6 Hz, 1H), 3.89 (d, *J* = 15.5 Hz, 6H), 3.27-3.13 (m, 2H), 2.72-2.57 (m, 2H), 2.25 (s, 3H);

**<sup>13</sup>C NMR (101 MHz, CDCl<sub>3</sub>)** δ 205.3, 177.8, 148.8, 148.3, 129.2, 127.2, 125.0, 124.0, 110.8, 105.6, 80.8, 56.1, 56.1, 47.5, 42.7, 40.7, 30.1;

**HRMS (ESI) *m/z*:** [M+H]<sup>+</sup> calculated for C<sub>17</sub>H<sub>19</sub>O<sub>5</sub><sup>+</sup>: 303.1227, found: 303.1226;

**HPLC analysis:** Daicel CHIRALCEL<sup>®</sup> OD-H, *n*-hexane/*i*-PrOH = 80/20, flow rate = 1.0 mL/min, λ = 254 nm, retention time: *t*<sub>major</sub> = 19.3 min, *t*<sub>minor</sub> = 23.0 min;

[α]<sub>D</sub><sup>25</sup> = +25.8 (c = 0.092, CHCl<sub>3</sub>).

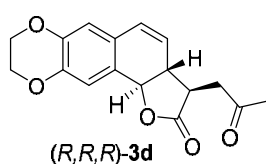

According to the general procedure A: White solid, 18.9 mg, 63% yield, 14:1 rr, 10:1 dr, 92% ee;

**<sup>1</sup>H NMR (600 MHz, CDCl<sub>3</sub>)** δ 6.94 (s, 1H), 6.72 (s, 1H), 6.43 (dd, *J* = 9.5, 2.9 Hz, 1H), 6.16 (dd, *J* = 9.5, 2.3 Hz, 1H), 4.92 (d, *J* = 14.2 Hz, 1H), 4.29-4.22 (m, 4H), 3.25-3.12 (m, 2H), 2.68-2.55 (m, 2H), 2.24 (s, 3H);

**<sup>13</sup>C NMR (151 MHz, CDCl<sub>3</sub>)** δ 205.3, 177.7, 143.2, 142.8, 129.0, 127.9, 126.0, 124.1, 116.3, 111.4, 80.5, 64.5, 64.3, 47.4, 42.8, 40.7, 30.1;

**HRMS (ESI) *m/z*:** [M+H]<sup>+</sup> calculated for C<sub>17</sub>H<sub>17</sub>O<sub>5</sub><sup>+</sup>: 301.1071, found: 301.1068;

**HPLC analysis:** Daicel CHIRALCEL<sup>®</sup> OD-H, *n*-hexane/*i*-PrOH = 75/25, flow rate = 1.0 mL/min, λ = 254 nm, retention time: *t*<sub>major</sub> = 17.6 min, *t*<sub>minor</sub> = 24.6 min;

[α]<sub>D</sub><sup>25</sup> = -25.9 (c = 0.088, CHCl<sub>3</sub>).

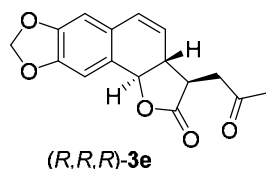

According to the general procedure A: White solid, 18.3 mg, 64% yield, 14:1 rr, 13:1 dr, 92% ee;

**<sup>1</sup>H NMR (600 MHz, CDCl<sub>3</sub>)** δ 6.95 (s, 1H), 6.69 (s, 1H), 6.44 (dd, *J* = 9.5, 2.9 Hz, 1H), 6.20 (dd, *J* = 9.5, 2.2 Hz, 1H), 5.97 (d, *J* = 7.0 Hz, 2H), 4.91 (d, *J* = 14.7 Hz, 1H), 3.25-3.13 (m, 2H), 2.69-2.55 (m, 2H), 2.24 (s, 3H);

$^{13}\text{C}$  NMR (151 MHz,  $\text{CDCl}_3$ )  $\delta$  205.3, 177.6, 147.2, 147.1, 129.4, 128.7, 126.4, 124.2, 107.8, 103.4, 101.2, 80.8, 47.3, 42.7, 40.6, 30.1;

HRMS (ESI)  $m/z$ :  $[\text{M}+\text{H}]^+$  calculated for  $\text{C}_{16}\text{H}_{15}\text{O}_5^+$ : 287.0914, found: 287.0915;

HPLC analysis: Daicel CHIRALPAK<sup>®</sup> AD-H, *n*-hexane/*i*-PrOH = 80/20, flow rate = 1.0 mL/min,  $\lambda$  = 254 nm, retention time:  $t_{\text{major}}$  = 15.6 min,  $t_{\text{minor}}$  = 19.8 min;

$[\alpha]_{\text{D}}^{25}$  = +56.5 ( $c$  = 0.1,  $\text{CHCl}_3$ ).

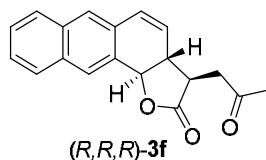

According to the general procedure A, when  $\text{Zn}(\text{OTf})_2$  as the co-catalyst: White solid, 19.8 mg, 68% yield, 8:1 dr, 92% ee;

$\text{Yb}(\text{OTf})_3$  was used as the co-catalyst instead of  $\text{Zn}(\text{OTf})_2$ : 20.4 mg, 70% yield, >20:1 dr, 92% ee;

$^1\text{H}$  NMR (400 MHz,  $\text{CDCl}_3$ )  $\delta$  7.90-7.76 (m, 3H), 7.63 (s, 1H), 7.56-7.43 (m, 2H), 6.73 (dd,  $J$  = 9.6, 3.0 Hz, 1H), 6.33 (dd,  $J$  = 9.6, 2.2 Hz, 1H), 5.16 (d,  $J$  = 13.2 Hz, 1H), 3.34-3.20 (m, 2H), 2.81-2.62 (m, 2H), 2.26 (s, 3H);

$^{13}\text{C}$  NMR (101 MHz,  $\text{CDCl}_3$ )  $\delta$  205.3, 177.6, 132.9, 132.6, 131.8, 130.5, 129.7, 128.1, 127.9, 126.7, 126.4, 126.2, 126.1, 120.3, 80.6, 47.2, 42.8, 40.8, 30.1;

HRMS (ESI)  $m/z$ :  $[\text{M}+\text{H}]^+$  calculated for  $\text{C}_{19}\text{H}_{17}\text{O}_3^+$ : 293.1172, found: 293.1176;

HPLC analysis: Daicel CHIRALCEL<sup>®</sup> OD-H, *n*-hexane/*i*-PrOH = 80/20, flow rate = 1.0 mL/min,  $\lambda$  = 254 nm, retention time:  $t_{\text{major}}$  = 17.8 min,  $t_{\text{minor}}$  = 22.2 min;

$[\alpha]_{\text{D}}^{25}$  = +45.0 ( $c$  = 0.1,  $\text{CHCl}_3$ ).

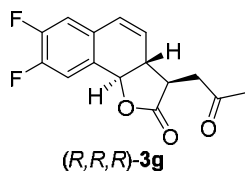

According to the general procedure A: White solid, 20.8 mg, 75% yield, 11:1 dr, 90% ee;

$^1\text{H}$  NMR (500 MHz,  $\text{CDCl}_3$ )  $\delta$  7.29-7.23 (m, 1H), 7.02 (dd,  $J$  = 10.5, 7.5 Hz, 1H), 6.48 (dd,  $J$  = 9.6, 3.0 Hz, 1H), 6.36 (dd,  $J$  = 9.7, 2.2 Hz, 1H), 4.94 (d,  $J$  = 14.5 Hz, 1H), 3.25 (dd,  $J$  = 18.6, 3.6 Hz, 1H), 3.19 (ddd,  $J$  = 12.2, 8.3, 3.5 Hz, 1H), 2.71-2.61 (m, 2H), 2.25 (s, 3H);

**<sup>13</sup>C NMR (126 MHz, CDCl<sub>3</sub>)** δ 205.3, 177.1, 150.7 (dd, *J* = 27.6, 13.0 Hz), 148.7 (dd, *J* = 31.1, 13.0 Hz), 130.9 (dd, *J* = 6.4, 3.6 Hz), 129.0 (dd, *J* = 6.4, 4.3 Hz), 128.0, 127.0 (d, *J* = 2.1 Hz), 116.2 (d, *J* = 18.4 Hz), 111.8 (d, *J* = 19.7 Hz), 79.4, 46.7, 42.7, 40.4, 30.1;

**<sup>19</sup>F NMR (471 MHz, CDCl<sub>3</sub>)** δ -136.72, -138.97;

**HRMS (ESI) m/z:** [M+H]<sup>+</sup> calculated for C<sub>15</sub>H<sub>13</sub>F<sub>2</sub>O<sub>3</sub><sup>+</sup>: 279.0827, found: 279.0827;

**HPLC analysis:** Daicel CHIRALCEL<sup>®</sup> OD-H, *n*-hexane/*i*-PrOH = 80/20, flow rate = 1.0 mL/min, λ = 254 nm, retention time: t<sub>major</sub> = 15.1 min, t<sub>minor</sub> = 18.0 min;

[α]<sub>D</sub><sup>25</sup> = -4.8 (c = 0.1, CHCl<sub>3</sub>).

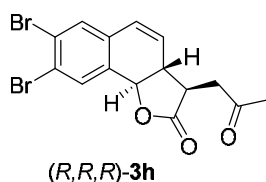

According to the general procedure A, when Zn(OTf)<sub>2</sub> was used as the co-catalyst:

White solid, 31 mg, 78% yield, 8:1 dr, 94% ee;

Lu(OTf)<sub>3</sub> was used as the co-catalyst at 50 °C: 29 mg, 73% yield, 11:1 dr, 94% ee;

**<sup>1</sup>H NMR (400 MHz, CDCl<sub>3</sub>)** δ 7.67 (s, 1H), 7.44 (s, 1H), 6.51-6.37 (m, 2H), 4.92 (d, *J* = 14.4 Hz, 1H), 3.34-3.07 (m, 2H), 2.77-2.53 (m, 2H), 2.25 (s, 3H);

**<sup>13</sup>C NMR (101 MHz, CDCl<sub>3</sub>)** δ 205.2, 176.8, 134.4, 132.8, 131.7, 128.2, 127.8, 127.0, 124.1, 123.9, 79.1, 46.7, 42.7, 40.4, 30.1;

**HRMS (ESI) m/z:** [M+H]<sup>+</sup> calculated for C<sub>15</sub>H<sub>13</sub>Br<sub>2</sub>O<sub>3</sub><sup>+</sup>: 398.9226, found: 398.9222;

**HPLC analysis:** Daicel CHIRALCEL<sup>®</sup> OD-H, *n*-hexane/*i*-PrOH = 80/20, flow rate = 1.0 mL/min, λ = 254 nm, retention time: t<sub>major</sub> = 18.3 min, t<sub>minor</sub> = 21.4 min;

[α]<sub>D</sub><sup>25</sup> = +6.2 (c = 0.1, CHCl<sub>3</sub>).

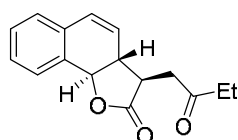

According to the general procedure A, when Zn(OTf)<sub>2</sub> was used as the co-catalyst:

White solid, 17.9 mg, 70% yield, 7:1 dr, 91% ee;

Yb(OTf)<sub>3</sub> was used as the co-catalyst: 18.9 mg, 74% yield, 10:1 dr, 91% ee;

**<sup>1</sup>H NMR (400 MHz, CDCl<sub>3</sub>)** δ 7.48-7.40 (m, 1H), 7.34-7.27 (m, 2H), 7.23-7.16 (m, 1H), 6.57 (dd, *J* = 9.6, 3.0 Hz, 1H), 6.30 (dd, *J* = 9.5, 2.2 Hz, 1H), 5.04 (d, *J* = 14.4 Hz, 1H), 3.31-3.14 (m, 2H), 2.77-2.41 (m, 4H), 1.11 (t, *J* = 7.3 Hz, 3H);

**<sup>13</sup>C NMR (101 MHz, CDCl<sub>3</sub>)** δ 208.3, 177.8, 134.1, 132.3, 129.6, 128.0, 127.9, 126.9, 126.1, 121.6, 80.6, 47.1, 41.4, 40.6, 36.2, 7.7;

**HRMS (ESI) *m/z*:** [M+H]<sup>+</sup> calculated for C<sub>16</sub>H<sub>17</sub>O<sub>3</sub><sup>+</sup>: 257.1172, found: 257.1174;

**HPLC analysis:** Daicel CHIRALCEL<sup>®</sup> OD-H, *n*-hexane/*i*-PrOH = 90/10, flow rate = 1.0 mL/min, λ = 254 nm, retention time: *t*<sub>major</sub> = 14.1 min, *t*<sub>minor</sub> = 17.0 min;

[α]<sub>D</sub><sup>25</sup> = -4.75 (c = 0.08, CHCl<sub>3</sub>).

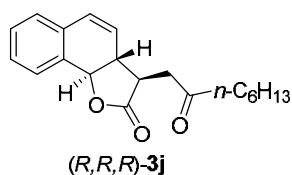

According to the general procedure A, when Zn(OTf)<sub>2</sub> was used as the co-catalyst: White solid, 26.6 mg, 85% yield, 7:1 dr, 83% ee;

Al(OTf)<sub>3</sub> was used as the co-catalyst: 25.0 mg, 80% yield, 15:1 dr, 89% ee;

**<sup>1</sup>H NMR (600 MHz, CDCl<sub>3</sub>)** δ 7.47-7.40 (m, 1H), 7.36-7.27 (m, 2H), 7.22-7.15 (m, 1H), 6.56 (dd, *J* = 9.5, 3.1 Hz, 1H), 6.29 (dd, *J* = 9.5, 2.2 Hz, 1H), 5.03 (d, *J* = 14.4 Hz, 1H), 3.31-3.14 (m, 2H), 2.67 (ddt, *J* = 14.3, 12.7, 2.6 Hz, 1H), 2.64-2.58 (m, 1H), 2.49 (tq, *J* = 16.6, 7.5 Hz, 2H), 1.62-1.55 (m, 2H), 1.36-1.26 (m, 6H), 0.92-0.82 (m, 3H);

**<sup>13</sup>C NMR (151 MHz, CDCl<sub>3</sub>)** δ 208.0, 177.8, 134.1, 132.3, 129.6, 128.0, 127.9, 126.9, 126.1, 121.6, 80.6, 47.1, 43.0, 41.8, 40.6, 31.5, 28.8, 23.7, 22.4, 14.0;

**HRMS (ESI) *m/z*:** [M+H]<sup>+</sup> calculated for C<sub>20</sub>H<sub>25</sub>O<sub>3</sub><sup>+</sup>: 313.1798, found: 313.1795;

**HPLC analysis:** Daicel CHIRALPAK<sup>®</sup> AD-H, *n*-hexane/*i*-PrOH = 95/5, flow rate = 1.0 mL/min, λ = 254 nm, retention time: *t*<sub>major</sub> = 11.2 min, *t*<sub>minor</sub> = 15.6 min;

[α]<sub>D</sub><sup>25</sup> = -13.53 (c = 0.068, CHCl<sub>3</sub>).

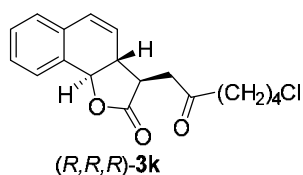

According to the general procedure A, when Zn(OTf)<sub>2</sub> was used as the co-catalyst:  
White solid, 20.7 mg, 65% yield, 10:1 dr, 98% ee;

Lu(OTf)<sub>3</sub> was used as the co-catalyst: 21.0 mg, 66% yield, 10:1 dr, 94% ee;

**<sup>1</sup>H NMR (500 MHz, CDCl<sub>3</sub>)** δ 7.48-7.41 (m, 1H), 7.35-7.27 (m, 2H), 7.22-7.17 (m, 1H), 6.58 (dd, *J* = 9.5, 3.1 Hz, 1H), 6.28 (dd, *J* = 9.5, 2.3 Hz, 1H), 5.04 (d, *J* = 14.4 Hz, 1H), 3.60-3.50 (m, 2H), 3.27-3.20 (m, 1H), 3.18 (dd, *J* = 18.2, 4.1 Hz, 1H), 2.74-2.47 (m, 4H), 1.86-1.73 (m, 4H);

**<sup>13</sup>C NMR (101 MHz, CDCl<sub>3</sub>)** δ 207.1, 177.7, 134.0, 132.2, 129.7, 128.0, 127.9, 127.0, 125.9, 121.6, 80.6, 46.9, 44.5, 42.0, 41.7, 40.6, 31.7, 20.9;

**HRMS (ESI) m/z:** [M+H]<sup>+</sup> calculated for C<sub>18</sub>H<sub>20</sub>ClO<sub>3</sub><sup>+</sup>: 319.1095, found: 319.1094;

**HPLC analysis:** Daicel CHIRALPAK<sup>®</sup> AD-H, *n*-hexane/*i*-PrOH = 90/10, flow rate = 1.0 mL/min, λ = 254 nm, retention time: t<sub>major</sub> = 18.0 min, t<sub>minor</sub> = 29.7 min;

[α]<sub>D</sub><sup>25</sup> = +60.2 (c = 0.1, CHCl<sub>3</sub>).

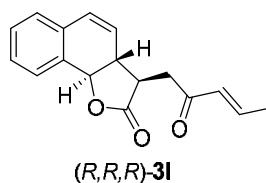

According to the general procedure A, when Zn(OTf)<sub>2</sub> was used as the co-catalyst:  
White solid, 19 mg, 71% yield, 7:1 dr, 89% ee;

Al(OTf)<sub>3</sub> was used as the co-catalyst: 17.7 mg, 66% yield, >20:1 dr, 89% ee;

**<sup>1</sup>H NMR (600 MHz, CDCl<sub>3</sub>)** δ 7.48-7.42 (m, 1H), 7.34-7.27 (m, 2H), 7.22-7.16 (m, 1H), 6.95 (dq, *J* = 15.8, 6.8 Hz, 1H), 6.56 (dd, *J* = 9.5, 3.0 Hz, 1H), 6.32 (dd, *J* = 9.5, 2.3 Hz, 1H), 6.19 (dq, *J* = 15.7, 1.7 Hz, 1H), 5.05 (d, *J* = 14.5 Hz, 1H), 3.36 (dd, *J* = 18.1, 3.3 Hz, 1H), 3.28 (ddd, *J* = 12.4, 9.0, 3.3 Hz, 1H), 2.74 (dd, *J* = 18.1, 9.0 Hz, 1H), 2.68 (ddt, *J* = 14.9, 12.7, 2.6 Hz, 1H), 1.94 (dd, *J* = 6.8, 1.7 Hz, 3H);

**<sup>13</sup>C NMR (151 MHz, CDCl<sub>3</sub>)** δ 196.6, 178.0, 144.2, 134.1, 132.3, 131.4, 129.5, 128.0, 127.9, 126.9, 126.4, 121.6, 80.6, 47.4, 40.7, 39.4, 18.4;

**HRMS (ESI) m/z:** [M+H]<sup>+</sup> calculated for C<sub>17</sub>H<sub>17</sub>O<sub>3</sub><sup>+</sup>: 269.1172, found: 269.1177;

**HPLC analysis:** Daicel CHIRALPAK<sup>®</sup> AD-H, *n*-hexane/*i*-PrOH = 90/10, flow rate = 1.0 mL/min, λ = 254 nm, retention time: t<sub>major</sub> = 13.7 min, t<sub>minor</sub> = 19.8 min;

[α]<sub>D</sub><sup>20</sup> = +170.5 (c = 0.1, CHCl<sub>3</sub>).

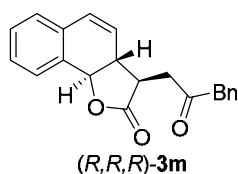

According to the general procedure A: White solid, 24.8 mg, 78% yield, >20:1 dr, 90% ee;

**<sup>1</sup>H NMR (600 MHz, CDCl<sub>3</sub>)** δ 7.44-7.39 (m, 1H), 7.36-7.32 (m, 2H), 7.31-7.26 (m, 3H), 7.24-7.19 (m, 2H), 7.20-7.15 (m, 1H), 6.54 (dd, *J* = 9.5, 2.9 Hz, 1H), 6.23 (dd, *J* = 9.6, 2.2 Hz, 1H), 5.01 (d, *J* = 14.4 Hz, 1H), 3.83-3.72 (m, 2H), 3.26-3.15 (m, 2H), 2.70-2.62 (m, 1H), 2.59 (ddt, *J* = 14.9, 12.4, 2.6 Hz, 1H);

**<sup>13</sup>C NMR (151 MHz, CDCl<sub>3</sub>)** δ 205.4, 177.6, 134.0, 133.5, 132.2, 129.6, 129.4, 128.9, 128.0, 127.9, 127.3, 126.9, 126.0, 121.6, 80.6, 50.3, 47.0, 41.1, 40.7;

**HRMS (ESI) m/z:** [M+H]<sup>+</sup> calculated for C<sub>21</sub>H<sub>19</sub>O<sub>3</sub><sup>+</sup>: 319.1329, found: 319.1324;

**HPLC analysis:** Daicel CHIRALPAK<sup>®</sup> AD-H, *n*-hexane/*i*-PrOH = 85/15, flow rate = 1.0 mL/min, λ = 254 nm, retention time: t<sub>major</sub> = 14.4 min, t<sub>minor</sub> = 19.5 min;

[α]<sub>D</sub><sup>25</sup> = +17.7 (c = 0.08, CHCl<sub>3</sub>).

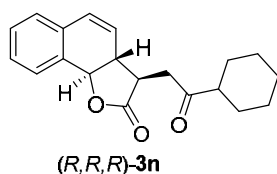

According to the general procedure A, when Zn(OTf)<sub>2</sub> was used as the co-catalyst: White solid, 24.8 mg, 80% yield, 6:1 dr, 92% ee;

Ga(OTf)<sub>3</sub> was used as the co-catalyst: 22.6 mg, 73% yield, 11:1 dr, 92% ee;

**<sup>1</sup>H NMR (500 MHz, CDCl<sub>3</sub>)** δ 7.48-7.39 (m, 1H), 7.35-7.27 (m, 2H), 7.21-7.16 (m, 1H), 6.56 (dd, *J* = 9.6, 3.0 Hz, 1H), 6.27 (dd, *J* = 9.6, 2.3 Hz, 1H), 5.03 (d, *J* = 14.4 Hz, 1H), 3.28-3.16 (m, 2H), 2.72-2.59 (m, 2H), 2.40 (tt, *J* = 11.2, 3.4 Hz, 1H), 1.94-1.83 (m, 2H), 1.83-1.75 (m, 2H), 1.72-1.64 (m, 1H), 1.44-1.14 (m, 5H);

**<sup>13</sup>C NMR (126 MHz, CDCl<sub>3</sub>)** δ 211.0, 178.0, 134.1, 132.3, 129.6, 128.0, 127.9, 126.9, 126.2, 121.6, 80.5, 50.9, 47.2, 40.6, 39.9, 28.4, 28.3, 25.7, 25.6, 25.5;

**HRMS (ESI) m/z:** [M+H]<sup>+</sup> calculated for C<sub>20</sub>H<sub>23</sub>O<sub>3</sub><sup>+</sup>: 311.1642, found: 311.1645;

**HPLC analysis:** Daicel CHIRALPAK<sup>®</sup> AS-H, *n*-hexane/*i*-PrOH = 90/10, flow rate = 1.0 mL/min, λ = 254 nm, retention time: t<sub>minor</sub> = 16.2 min, t<sub>major</sub> = 21.5 min;

[α]<sub>D</sub><sup>25</sup> = +42 (c = 0.1, CHCl<sub>3</sub>).

### 3.2 General procedure B for the synthesis of (*S,R,R*)-4

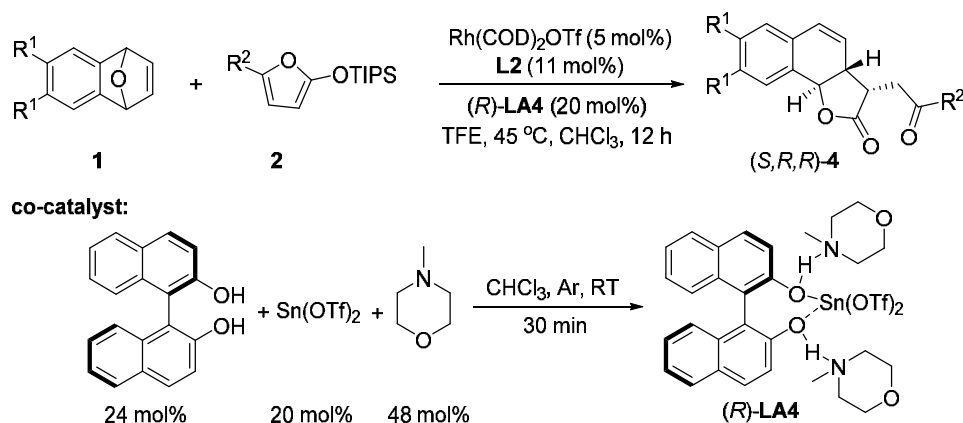

In a reaction tube,  $\text{Rh}(\text{COD})_2\text{OTf}$  (2.34 mg, 5.0 mol%) and **L2** (10.3 mg, 11 mol%) were dissolved in  $\text{CHCl}_3$  (1.0 mL) and the resulting solution was stirred for 30 min at RT. In another reaction tube, (*R*)-BINOL (6.84 mg, 24 mol%),  $\text{Sn}(\text{OTf})_2$  (8.34 mg, 20 mol%), NMM (4.9 mg, 48 mol%) were dissolved in  $\text{CHCl}_3$  (1.0 mL) and the resulting solution of cocatalyst (*R*)-**LA4** also was stirred for 30 min at RT. Then, the cocatalyst (*R*)-**LA4** in  $\text{CHCl}_3$  were added to the first reaction tube. Subsequently, TFE (35 mg, 3.5 eq), **1** (0.1 mmol) and **2** (0.5 mmol) were added. The reaction mixture was stirred under argon atmosphere at 45 °C for 12 h. After reaction completion, the solvent was evaporated under reduced pressure. The residue was purified by flash column chromatography on silica gel (petroleum ether/ ethyl acetate = 10:1) to afford the (*S,R,R*)-4.

**Note:** All *racemic* products **4** were synthesized in the presence of the *racemic* ligands (**L2** and *ent*-**L2** (1:1)). Due to the error in the preparation of *racemic* ligand, some *racemic* product mixture have a low ee values but below 5%.

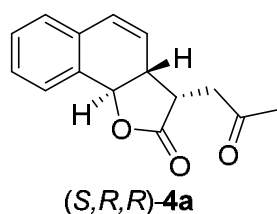

According to the general procedure B: White solid, 18.4 mg, 76% yield, >20:1 dr, 95% ee;

$^1\text{H NMR}$  (400 MHz,  $\text{CDCl}_3$ )  $\delta$  7.47-7.40 (m, 1H), 7.35-7.27 (m, 2H), 7.21-7.15 (m, 1H), 6.56 (dd,  $J = 9.6, 3.1$  Hz, 1H), 5.99 (dd,  $J = 9.5, 2.4$  Hz, 1H), 5.14 (d,  $J = 15.0$

Hz, 1H), 3.41 (ddd,  $J = 10.7, 7.8, 3.2$  Hz, 1H), 3.18 (ddt,  $J = 15.0, 7.8, 2.8$  Hz, 1H), 3.00 (dd,  $J = 18.4, 10.6$  Hz, 1H), 2.85 (dd,  $J = 18.4, 3.1$  Hz, 1H), 2.28 (s, 3H);  
 $^{13}\text{C}$  NMR (101 MHz,  $\text{CDCl}_3$ )  $\delta$  204.3, 178.8, 133.9, 132.0, 131.0, 128.2, 127.9, 127.0, 124.5, 121.8, 80.2, 44.4, 39.3, 38.6, 30.0;  
HRMS (ESI)  $m/z$ :  $[\text{M}+\text{H}]^+$  calculated for  $\text{C}_{15}\text{H}_{15}\text{O}_3^+$ : 243.1016, found: 243.1012;  
HPLC analysis: Daicel CHIRALPAK<sup>®</sup> AS-H,  $n$ -hexane/ $i$ -PrOH = 85/15, flow rate = 1.0 mL/min,  $\lambda = 254$  nm, retention time:  $t_{\text{minor}} = 26.5$  min,  $t_{\text{major}} = 30.0$  min;  
 $[\alpha]_{\text{D}}^{25} = +118.3$  ( $c = 0.1, \text{CHCl}_3$ ).

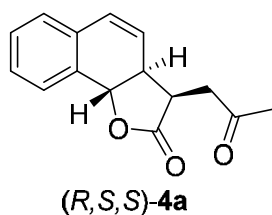

According to the general procedure B: *ent*-L2 was used as the ligand. White solid, 16.9 mg, 70% yield, >20:1 dr, 96% ee;

Spectral data were in agreement with those of the enantiomer reported above;

HPLC analysis: Daicel CHIRALPAK<sup>®</sup> AS-H,  $n$ -hexane/ $i$ -PrOH = 85/15, flow rate = 1.0 mL/min,  $\lambda = 254$  nm,, retention time:  $t_{\text{major}} = 26.6$  min,  $t_{\text{minor}} = 31.2$  min;

HRMS (ESI)  $m/z$ :  $[\text{M}+\text{H}]^+$  calculated for  $\text{C}_{15}\text{H}_{15}\text{O}_3^+$ : 243.1016, found: 243.1015;  
 $[\alpha]_{\text{D}}^{25} = -90.0$  ( $c = 0.1, \text{CHCl}_3$ ).

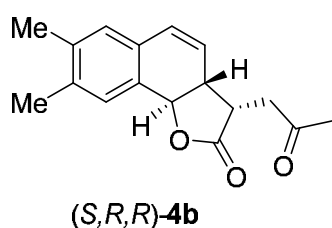

According to the general procedure B: White solid, 19.2 mg, 71% yield, >20:1 dr, 93% ee;

$^1\text{H}$  NMR (500 MHz,  $\text{CDCl}_3$ )  $\delta$  7.20 (s, 1H), 6.96 (s, 1H), 6.49 (dd,  $J = 9.6, 3.2$  Hz, 1H), 5.90 (dd,  $J = 9.5, 2.4$  Hz, 1H), 5.08 (d,  $J = 15.0$  Hz, 1H), 3.39 (ddd,  $J = 10.7, 7.8, 3.1$  Hz, 1H), 3.11 (ddt,  $J = 15.1, 7.8, 2.8$  Hz, 1H), 2.99 (dd,  $J = 18.4, 10.6$  Hz, 1H), 2.83 (dd,  $J = 18.3, 3.1$  Hz, 1H), 2.28 (d, 6H), 2.25 (s, 3H);

$^{13}\text{C}$  NMR (126 MHz,  $\text{CDCl}_3$ )  $\delta$  204.3, 178.9, 136.8, 136.0, 131.4, 130.8, 129.7, 128.4, 123.3, 123.1, 80.3, 44.8, 39.3, 38.6, 30.0, 19.7, 19.5;

**HRMS (ESI) m/z:**  $[M+H]^+$  calculated for  $C_{17}H_{19}O_3^+$ : 271.1329, found: 271.1329;

**HPLC analysis:** Daicel CHIRALCEL<sup>®</sup> OD-H, *n*-hexane/*i*-PrOH = 90/10, flow rate = 1.0 mL/min,  $\lambda$  = 254 nm, retention time:  $t_{\text{minor}}$  = 15.4 min,  $t_{\text{major}}$  = 17.4 min;

$[\alpha]_D^{25}$  = +124.6 (c = 0.1,  $CHCl_3$ ).

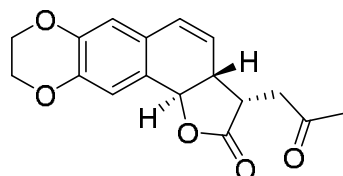

**(S,R,R)-4d**

According to the general procedure B: White solid, 18.3 mg, 61% yield, >20:1 dr, 94% ee;

**<sup>1</sup>H NMR (600 MHz,  $CDCl_3$ )**  $\delta$  6.92 (s, 1H), 6.70 (s, 1H), 6.41 (dd,  $J$  = 9.5, 3.1 Hz, 1H), 5.85 (dd,  $J$  = 9.5, 2.4 Hz, 1H), 5.01 (d,  $J$  = 14.8 Hz, 1H), 4.29-4.21 (m, 4H), 3.38 (ddd,  $J$  = 10.7, 7.8, 3.1 Hz, 1H), 3.09 (ddt,  $J$  = 14.9, 7.7, 2.8 Hz, 1H), 2.97 (dd,  $J$  = 18.4, 10.7 Hz, 1H), 2.81 (dd,  $J$  = 18.4, 3.1 Hz, 1H), 2.26 (s, 3H);

**<sup>13</sup>C NMR (151 MHz,  $CDCl_3$ )**  $\delta$  204.3, 178.8, 143.3, 142.8, 130.3, 127.6, 125.7, 122.6, 116.3, 111.5, 80.0, 64.5, 64.3, 44.6, 39.2, 38.6, 30.0;

**HRMS (ESI) m/z:**  $[M+H]^+$  calculated for  $C_{17}H_{17}O_5^+$ : 301.1071, found: 301.1070;

**HPLC analysis:** Daicel CHIRALCEL<sup>®</sup> OD-H, *n*-hexane/*i*-PrOH = 80/20, flow rate = 1.0 mL/min,  $\lambda$  = 254 nm, retention time:  $t_{\text{minor}}$  = 25.2 min,  $t_{\text{major}}$  = 29.0 min;

$[\alpha]_D^{25}$  = +141.9 (c = 0.1,  $CHCl_3$ ).

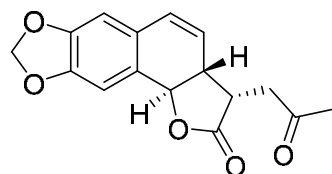

**(S,R,R)-4e**

According to the general procedure B, 3.0 eq **2** was used at 40 °C: White solid, 16.6 mg, 58% yield, 92% ee;

**<sup>1</sup>H NMR (500 MHz,  $CDCl_3$ )**  $\delta$  6.93 (s, 1H), 6.68 (s, 1H), 6.42 (dd,  $J$  = 9.6, 3.1 Hz, 1H), 5.97 (dd,  $J$  = 5.6, 1.4 Hz, 2H), 5.89 (dd,  $J$  = 9.6, 2.4 Hz, 1H), 5.02 (d,  $J$  = 15.4 Hz, 1H), 3.38 (ddd,  $J$  = 10.8, 7.9, 3.1 Hz, 1H), 3.10 (ddt,  $J$  = 15.4, 7.8, 2.8 Hz, 1H), 2.99 (dd,  $J$  = 18.5, 10.7 Hz, 1H), 2.82 (dd,  $J$  = 18.5, 3.1 Hz, 1H), 2.27 (s, 3H);

$^{13}\text{C}$  NMR (126 MHz,  $\text{CDCl}_3$ )  $\delta$  204.3, 178.7, 147.3, 147.1, 130.7, 128.4, 126.1, 122.6, 107.9, 103.6, 101.2, 80.3, 44.6, 39.3, 38.6, 30.0;

HRMS (ESI)  $m/z$ :  $[\text{M}+\text{H}]^+$  calculated for  $\text{C}_{16}\text{H}_{15}\text{O}_5^+$ : 287.0914, found: 287.0913;

HPLC analysis: Daicel CHIRALCEL<sup>®</sup> OD-H, *n*-hexane/*i*-PrOH = 70/30, flow rate = 1.0 mL/min,  $\lambda$  = 254 nm, retention time:  $t_{\text{minor}}$  = 13.7 min,  $t_{\text{major}}$  = 15.8 min;

$[\alpha]_{\text{D}}^{25}$  = +171.8 ( $c$  = 0.084,  $\text{CHCl}_3$ ).

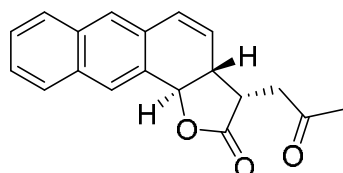

(*S,R,R*)-**4f**

According to the general procedure B: White solid, 22.2 mg, 76% yield, >20:1 dr, 94% ee;

$^1\text{H}$  NMR (600 MHz,  $\text{CDCl}_3$ )  $\delta$  7.87-7.78 (m, 3H), 7.63 (s, 1H), 7.52-7.45 (m, 2H), 6.72 (dd,  $J$  = 9.5, 3.1 Hz, 1H), 6.01 (dd,  $J$  = 9.5, 2.4 Hz, 1H), 5.25 (d,  $J$  = 13.9 Hz, 1H), 3.46 (ddd,  $J$  = 10.7, 7.7, 3.1 Hz, 1H), 3.24 (ddt,  $J$  = 13.9, 7.7, 2.8 Hz, 1H), 3.02 (dd,  $J$  = 18.4, 10.6 Hz, 1H), 2.88 (dd,  $J$  = 18.4, 3.1 Hz, 1H), 2.30 (s, 3H);

$^{13}\text{C}$  NMR (151 MHz,  $\text{CDCl}_3$ )  $\delta$  204.3, 178.7, 132.9, 132.8, 131.7, 131.2, 130.3, 128.1, 127.9, 126.8, 126.5, 126.4, 124.7, 120.6, 80.2, 44.4, 39.3, 38.8, 30.0;

HRMS (ESI)  $m/z$ :  $[\text{M}+\text{H}]^+$  calculated for  $\text{C}_{19}\text{H}_{17}\text{O}_3^+$ : 293.1172, found: 293.1168;

HPLC analysis: Daicel CHIRALCEL<sup>®</sup> OD-H, *n*-hexane/*i*-PrOH = 80/20, flow rate = 1.0 mL/min,  $\lambda$  = 254 nm, retention time:  $t_{\text{minor}}$  = 21.3 min,  $t_{\text{major}}$  = 25.8 min;

$[\alpha]_{\text{D}}^{25}$  = +145 ( $c$  = 0.1,  $\text{CHCl}_3$ ).

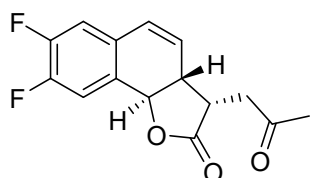

(*S,R,R*)-**4g**

According to the general procedure B, the reaction was conducted at 40 °C: White solid, 17.3 mg, 63% yield, >20:1 dr, 95% ee;

$^1\text{H}$  NMR (500 MHz,  $\text{CDCl}_3$ )  $\delta$  7.26-7.20 (m, 1H), 7.01 (dd,  $J$  = 10.6, 7.5 Hz, 1H), 6.46 (dd,  $J$  = 9.6, 3.1 Hz, 1H), 6.04 (dd,  $J$  = 9.7, 2.4 Hz, 1H), 5.03 (d,  $J$  = 15.2 Hz,

1H), 3.41 (ddd,  $J = 10.8, 7.8, 3.1$  Hz, 1H), 3.14 (ddt,  $J = 15.2, 7.8, 2.8$  Hz, 1H), 2.97 (dd,  $J = 18.5, 10.7$  Hz, 1H), 2.85 (dd,  $J = 18.5, 3.1$  Hz, 1H), 2.28 (s, 3H);

$^{13}\text{C}$  NMR (126 MHz,  $\text{CDCl}_3$ )  $\delta$  204.1, 178.1, 150.8 (dd,  $J = 13.4, 9.5$  Hz), 148.8 (t,  $J = 13.1$  Hz), 130.8 (dd,  $J = 5.8, 4.0$  Hz), 129.3 (d,  $J = 1.9$  Hz), 128.8 (dd,  $J = 6.3, 4.4$  Hz), 125.5 (d,  $J = 2.3$  Hz), 116.3 (d,  $J = 18.4$  Hz), 112.0 (dd,  $J = 19.8$  Hz), 79.0, 44.1, 39.3, 38.5, 30.0;

$^{19}\text{F}$  NMR (471 MHz,  $\text{CDCl}_3$ )  $\delta$  -136.4, -138.9;

HRMS (ESI)  $m/z$ :  $[\text{M}+\text{H}]^+$  calculated for  $\text{C}_{15}\text{H}_{13}\text{F}_2\text{O}_3^+$ : 279.0827, found: 279.0827;

HPLC analysis: Daicel CHIRALCEL<sup>®</sup> OD-H, *n*-hexane/*i*-PrOH = 80/20, flow rate = 1.0 mL/min,  $\lambda = 254$  nm, retention time:  $t_{\text{minor}} = 16.1$  min,  $t_{\text{major}} = 18.5$  min;

$[\alpha]_{\text{D}}^{25} = +92.4$  ( $c = 0.088$ ,  $\text{CHCl}_3$ ).

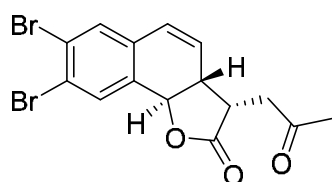

(*S,R,R*)-4h

According to the general procedure B: White solid, 25.9 mg, 65% yield, >20:1 dr, 90% ee;

$^1\text{H}$  NMR (600 MHz,  $\text{CDCl}_3$ )  $\delta$  7.68 (s, 1H), 7.44 (s, 1H), 6.47 (dd,  $J = 9.5, 3.1$  Hz, 1H), 6.09 (dd,  $J = 9.5, 2.4$  Hz, 1H), 5.02 (d,  $J = 15.1$  Hz, 1H), 3.41 (ddd,  $J = 10.7, 7.7, 3.0$  Hz, 1H), 3.13 (ddt,  $J = 15.1, 7.8, 2.8$  Hz, 1H), 2.96 (dd,  $J = 18.5, 10.6$  Hz, 1H), 2.86 (dd,  $J = 18.5, 3.1$  Hz, 1H), 2.28 (s, 3H);

$^{13}\text{C}$  NMR (151 MHz,  $\text{CDCl}_3$ )  $\delta$  204.1, 177.9, 134.3, 132.5, 131.8, 129.2, 127.3, 126.8, 124.2, 124.1, 78.7, 44.0, 39.2, 38.4, 30.0;

HRMS (ESI)  $m/z$ :  $[\text{M}+\text{H}]^+$  calculated for  $\text{C}_{15}\text{H}_{13}\text{Br}_2\text{O}_3^+$ : 398.9226, found: 398.9230;

HPLC analysis: Daicel CHIRALCEL<sup>®</sup> OD-H, *n*-hexane/*i*-PrOH = 70/30, flow rate = 1.0 mL/min,  $\lambda = 254$  nm, retention time:  $t_{\text{minor}} = 15.4$  min,  $t_{\text{major}} = 21.6$  min;

$[\alpha]_{\text{D}}^{25} = +100.1$  ( $c = 0.1$ ,  $\text{CHCl}_3$ ).

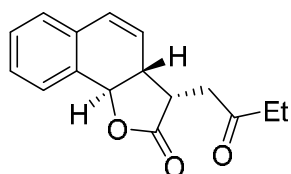

(*S,R,R*)-4i

According to the general procedure B: White solid, 17.7 mg, 69% yield, >20:1 dr, 95% ee;

**<sup>1</sup>H NMR (500 MHz, CDCl<sub>3</sub>)** δ 7.46-7.40 (m, 1H), 7.34-7.27 (m, 2H), 7.21-7.15 (m, 1H), 6.55 (dd, *J* = 9.5, 3.1 Hz, 1H), 5.97 (dd, *J* = 9.5, 2.4 Hz, 1H), 5.14 (d, *J* = 15.0 Hz, 1H), 3.43 (ddd, *J* = 10.8, 7.8, 3.1 Hz, 1H), 3.17 (ddt, *J* = 15.1, 7.9, 2.8 Hz, 1H), 2.97 (dd, *J* = 18.2, 10.7 Hz, 1H), 2.81 (dd, *J* = 18.2, 3.2 Hz, 1H), 2.61-2.49 (m, 2H), 1.14 (t, *J* = 7.4 Hz, 3H);

**<sup>13</sup>C NMR (126 MHz, CDCl<sub>3</sub>)** δ 207.2, 178.9, 133.9, 132.0, 131.0, 128.2, 127.9, 127.0, 124.6, 121.8, 80.1, 44.4, 38.6, 38.0, 36.1, 7.9;

**HRMS (ESI) m/z:** [M+H]<sup>+</sup> calculated for C<sub>16</sub>H<sub>17</sub>O<sub>3</sub><sup>+</sup>: 257.1172, found: 257.1167;

**HPLC analysis:** Daicel CHIRALPAK<sup>®</sup> AD-H, *n*-hexane/*i*-PrOH = 85/15, flow rate = 1.0 mL/min, λ = 254 nm, retention time: t<sub>minor</sub> = 10.4 min, t<sub>major</sub> = 11.1 min;

[α]<sub>D</sub><sup>25</sup> = +108.3 (c = 0.1, CHCl<sub>3</sub>).

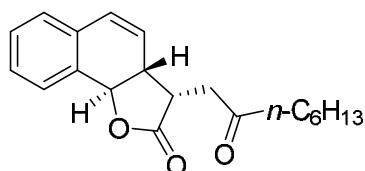

(*S,R,R*)-4j

According to the general procedure B: White solid, 20.3 mg, 65% yield, >20:1 dr, 95% ee;

**<sup>1</sup>H NMR (500 MHz, CDCl<sub>3</sub>)** δ 7.47-7.40 (m, 1H), 7.34-7.27 (m, 2H), 7.21-7.15 (m, 1H), 6.55 (dd, *J* = 9.6, 3.1 Hz, 1H), 5.97 (dd, *J* = 9.6, 2.5 Hz, 1H), 5.13 (d, *J* = 15.0 Hz, 1H), 3.42 (ddd, *J* = 10.8, 7.8, 3.0 Hz, 1H), 3.17 (ddt, *J* = 15.1, 7.8, 2.8 Hz, 1H), 2.97 (dd, *J* = 18.3, 10.8 Hz, 1H), 2.80 (dd, *J* = 18.3, 3.1 Hz, 1H), 2.57-2.44 (m, 2H), 1.65-1.58 (m, 2H), 1.36-1.26 (m, 6H), 0.95-0.85 (m, 3H);

**<sup>13</sup>C NMR (126 MHz, CDCl<sub>3</sub>)** δ 206.9, 178.9, 133.9, 132.0, 130.9, 128.2, 127.9, 127.0, 124.6, 121.8, 80.1, 44.4, 42.9, 38.5, 38.4, 31.5, 28.8, 23.9, 22.4, 14.0;

**HRMS (ESI) m/z:** [M+H]<sup>+</sup> calculated for C<sub>20</sub>H<sub>25</sub>O<sub>3</sub><sup>+</sup>: 313.1798, found: 313.1801;

**HPLC analysis:** Daicel CHIRALCEL<sup>®</sup> OD-H, *n*-hexane/*i*-PrOH = 95/5, flow rate =

1.0 mL/min,  $\lambda = 254$  nm, retention time:  $t_{\text{minor}} = 22.9$  min,  $t_{\text{major}} = 24.1$  min;

$[\alpha]_{\text{D}}^{25} = +107.2$  ( $c = 0.1$ ,  $\text{CHCl}_3$ ).

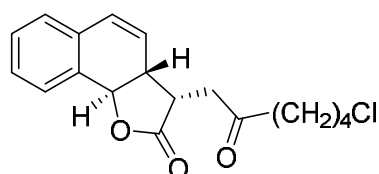

(*S,R,R*)-**4k**

According to the general procedure B: White solid, 19.1 mg, 60% yield, >20:1 dr, 97% ee;

**$^1\text{H}$  NMR (600 MHz,  $\text{CDCl}_3$ )**  $\delta$  7.47-7.40 (m, 1H), 7.34-7.28 (m, 2H), 7.21-7.15 (m, 1H), 6.56 (dd,  $J = 9.5, 3.1$  Hz, 1H), 5.96 (dd,  $J = 9.5, 2.4$  Hz, 1H), 5.14 (d,  $J = 15.0$  Hz, 1H), 3.62-3.53 (m, 2H), 3.42 (ddd,  $J = 10.8, 7.7, 3.2$  Hz, 1H), 3.18 (ddt,  $J = 15.1, 7.8, 2.8$  Hz, 1H), 2.97 (dd,  $J = 18.2, 10.6$  Hz, 1H), 2.82 (dd,  $J = 18.1, 3.3$  Hz, 1H), 2.65-2.50 (m, 2H), 1.87-1.77 (m, 4H);

**$^{13}\text{C}$  NMR (151 MHz,  $\text{CDCl}_3$ )**  $\delta$  206.0, 178.7, 133.9, 132.0, 131.1, 128.3, 128.0, 127.1, 124.4, 121.8, 80.2, 44.5, 44.4, 41.9, 38.6, 38.5, 31.8, 21.1;

**HRMS (ESI)  $m/z$ :**  $[\text{M}+\text{H}]^+$  calculated for  $\text{C}_{18}\text{H}_{20}\text{ClO}_3^+$ : 319.1095, found: 319.1098;

**HPLC analysis:** Daicel CHIRALPAK<sup>®</sup> AD-H, *n*-hexane/*i*-PrOH = 90/10, flow rate = 1.0 mL/min,  $\lambda = 254$  nm, retention time:  $t_{\text{minor}} = 28.6$  min,  $t_{\text{major}} = 31.8$  min;

$[\alpha]_{\text{D}}^{25} = +113.9$  ( $c = 0.1$ ,  $\text{CHCl}_3$ ).

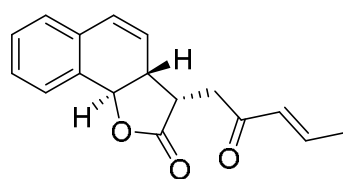

(*S,R,R*)-**4l**

According to the general procedure B, 3.0 equiv of **2** was used at 40 °C: White solid, 16.6 mg, 62% yield, >20:1 dr, 93% ee;

**$^1\text{H}$  NMR (500 MHz,  $\text{CDCl}_3$ )**  $\delta$  7.47-7.41 (m, 1H), 7.34-7.27 (m, 2H), 7.21-7.14 (m, 1H), 6.97 (dq,  $J = 15.9, 6.9$  Hz, 1H), 6.53 (dd,  $J = 9.6, 3.1$  Hz, 1H), 6.23 (dd,  $J = 15.9, 1.7$  Hz, 1H), 6.00 (dd,  $J = 9.5, 2.4$  Hz, 1H), 5.16 (d,  $J = 15.1$  Hz, 1H), 3.48 (ddd,  $J = 10.7, 7.8, 2.8$  Hz, 1H), 3.20 (ddt,  $J = 15.1, 7.8, 2.8$  Hz, 1H), 3.11 (dd,  $J = 18.0, 11.0$  Hz, 1H), 2.94 (dd,  $J = 17.9, 2.9$  Hz, 1H), 1.96 (dd,  $J = 6.9, 1.7$  Hz, 3H);

$^{13}\text{C}$  NMR (126 MHz,  $\text{CDCl}_3$ )  $\delta$  195.5, 179.1, 144.5, 134.0, 132.1, 131.1, 130.7, 128.1, 127.9, 127.0, 125.0, 121.8, 80.2, 44.5, 38.6, 35.9, 18.4;

HRMS (ESI)  $m/z$ :  $[\text{M}+\text{H}]^+$  calculated for  $\text{C}_{17}\text{H}_{17}\text{O}_3^+$ : 269.1172, found: 269.1174;

HPLC analysis: Daicel CHIRALPAK<sup>®</sup> AD-H, *n*-hexane/*i*-PrOH = 90/10, flow rate = 1.0 mL/min,  $\lambda$  = 254 nm, retention time:  $t_{\text{major}}$  = 16.8 min,  $t_{\text{minor}}$  = 17.8 min;

$[\alpha]_{\text{D}}^{25}$  = +230.0 ( $c$  = 0.024,  $\text{CHCl}_3$ ).

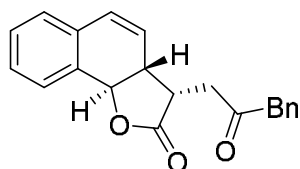

(*S,R,R*)-**4m**

According to the general procedure B, 3.0 equiv of **2** was used at 40 °C: White solid, 20.1 mg, 63% yield, >20:1 dr, 98% ee;

$^1\text{H}$  NMR (600 MHz,  $\text{CDCl}_3$ )  $\delta$  7.42-7.38 (m, 1H), 7.38-7.32 (m, 2H), 7.32-7.27 (m, 3H), 7.26-7.20 (m, 2H), 7.19-7.13 (m, 1H), 6.47 (dd,  $J$  = 9.6, 3.1 Hz, 1H), 5.84 (dd,  $J$  = 9.5, 2.4 Hz, 1H), 5.04 (d,  $J$  = 15.1 Hz, 1H), 3.80 (s, 2H), 3.39 (ddd,  $J$  = 10.8, 7.8, 3.0 Hz, 1H), 3.13 (ddt,  $J$  = 15.1, 7.7, 3.0 Hz, 1H), 3.01 (dd,  $J$  = 18.5, 10.9 Hz, 1H), 2.82 (dd,  $J$  = 18.5, 3.0 Hz, 1H);

$^{13}\text{C}$  NMR (151 MHz,  $\text{CDCl}_3$ )  $\delta$  204.3, 178.7, 133.8, 133.3, 132.0, 130.8, 129.4, 129.0, 128.2, 127.9, 127.5, 127.0, 124.3, 121.8, 80.1, 50.2, 44.3, 38.5, 37.6;

HRMS (ESI)  $m/z$ :  $[\text{M}+\text{H}]^+$  calculated for  $\text{C}_{21}\text{H}_{19}\text{O}_3^+$ : 319.1329, found: 319.1326;

HPLC analysis: Daicel CHIRALPAK<sup>®</sup> AS-H, *n*-hexane/*i*-PrOH = 85/15, flow rate = 1.0 mL/min,  $\lambda$  = 254 nm, retention time:  $t_{\text{major}}$  = 19.7 min,  $t_{\text{minor}}$  = 26.5 min;

$[\alpha]_{\text{D}}^{25}$  = +69.1 ( $c$  = 0.08,  $\text{CHCl}_3$ ).

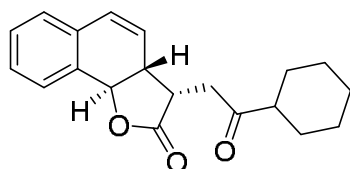

(*S,R,R*)-**4n**

According to the general procedure B: White solid, 23.2 mg, 75% yield, >20:1 dr, 94% ee;

$^1\text{H NMR}$  (500 MHz,  $\text{CDCl}_3$ )  $\delta$  7.47-7.38 (m, 1H), 7.35-7.27 (m, 2H), 7.21-7.14 (m, 1H), 6.54 (dd,  $J = 9.5, 3.1$  Hz, 1H), 5.92 (dd,  $J = 9.5, 2.4$  Hz, 1H), 5.13 (d,  $J = 15.1$  Hz, 1H), 3.42 (ddd,  $J = 10.8, 7.8, 2.8$  Hz, 1H), 3.16 (ddt,  $J = 15.1, 7.8, 2.8$  Hz, 1H), 3.03 (dd,  $J = 18.4, 11.0$  Hz, 1H), 2.81 (dd,  $J = 18.4, 2.8$  Hz, 1H), 2.43 (tt,  $J = 11.4, 3.4$  Hz, 1H), 1.95-1.85 (m, 2H), 1.85-1.77 (m, 2H), 1.73-1.66 (m, 1H), 1.47-1.35 (m, 2H), 1.35-1.16 (m, 3H);

$^{13}\text{C NMR}$  (126 MHz,  $\text{CDCl}_3$ )  $\delta$  209.8, 179.1, 133.9, 132.0, 130.9, 128.2, 127.9, 127.0, 124.6, 121.8, 80.1, 50.9, 44.3, 38.4, 36.4, 28.7, 28.5, 25.7, 25.5, 25.4;

HRMS (ESI)  $m/z$ :  $[\text{M}+\text{H}]^+$  calculated for  $\text{C}_{20}\text{H}_{23}\text{O}_3^+$ : 311.1642, found: 311.1647;

HPLC analysis: Daicel CHIRALCEL<sup>®</sup> OD-H, *n*-hexane/*i*-PrOH = 90/10, flow rate = 1.0 mL/min,  $\lambda = 254$  nm, retention time:  $t_{\text{major}} = 11.3$  min,  $t_{\text{minor}} = 12.6$  min;

$[\alpha]_{\text{D}}^{25} = +98$  ( $c = 0.1$ ,  $\text{CHCl}_3$ ).

## 4. Mechanism studies

### 4.1 Discovery and isolation of intermediates

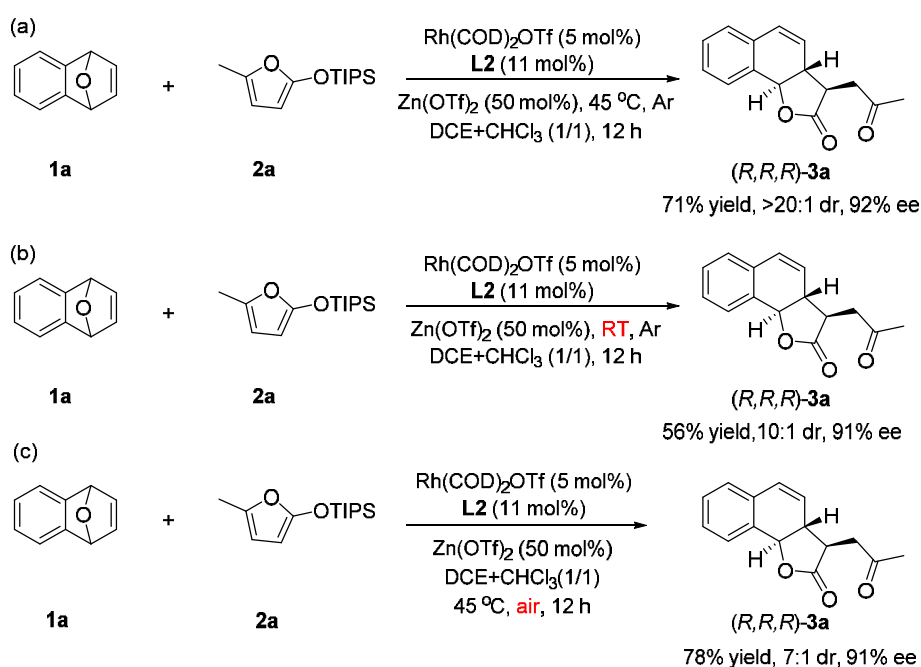

**Scheme S1.** An unusual decrease of diastereoselectivity for  $(R,R,R)\text{-3a}$

In the cooperative  $\text{Rh}(\text{I})/\text{Zn}(\text{OTf})_2$ -catalysis, we observed the erosion of diastereomeric ratio, when the reaction was exposed to the atmosphere of air or at room temperature (Scheme S1). During these two processes, a non-isolatable transient adduct would be initially detected and finally converted to the product **3a** or **4a**. We

suspected that the detected transient adduct is either **6** or its and a certain C $\alpha$ -racemization of the lactone motif in the transient adduct occurred with the assistance of water or at a lower temperature. Therefore, the reaction was then conducted in the air at room temperature, and we detected that **6** can be produced in up to 89% nmr yield with 11:1 dr in the mixture of reaction before purification (Scheme S2). Upon flash chromatography for isolation, a variable dr of **6** & **7** ranging from 2:1 to 3:1 was obtained in 89% yield, affirming that **6** is readily prone to C $\alpha$ -racemization.

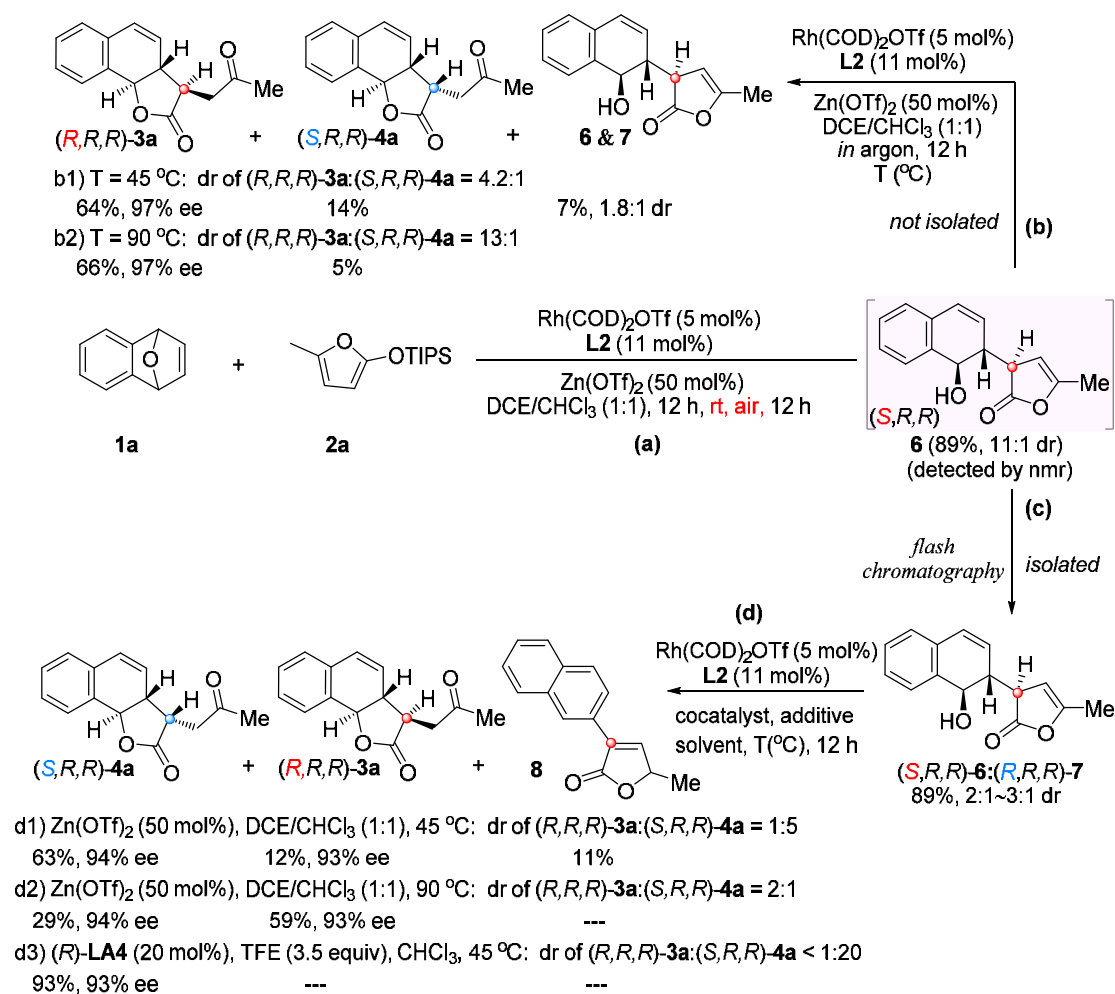

**Scheme S2.** Intramolecular cyclizations of **6**

*Scheme S2-a:* Under an air atmosphere, Rh(COD)<sub>2</sub>OTf (4.68 mg, 5.0 mol%) and L2 (20.6 mg, 11 mol%) were dissolved in the mixture solvents of DCE (2.0 mL) and CHCl<sub>3</sub> (2.0 mL) and the resulting solution was stirred for 30 min at RT. Subsequently, Zn(OTf)<sub>2</sub> (36.4 mg, 50 mol%), **1a** (28.8 mg, 0.2 mmol) and **2a** (256 mg, 1.0 mmol) were added. The reaction mixture was stirred at RT under air for 12 h. The reaction mixture was directly determined by <sup>1</sup>H NMR spectroscopy, giving **6** in 89% nmr yield with 11:1 dr, when 1,4-benzodioxan was used as the internal standard.

*Scheme S2-b:* The reaction mixture from *Scheme S2-a* was further stirred and heated at 45 °C or 90 °C for 12 h. After reaction completion, the solvent was evaporated under reduced pressure. The residue was purified by flash column chromatography on silica gel (petroleum ether/ ethyl acetate = 10:1) to afford the product. At 45 °C, the reaction gave the mixture diastereomers of (*R,R,R*)-**3a** and (*S,R,R*)-**4a** with 4.2:1, along with the rest of **6** & **7** in the yield of 7% with 1.8:1 dr (**6:7**) (Scheme S2-b1). At 90 °C, the reaction gave the mixture diastereomers of (*R,R,R*)-**3a** and (*S,R,R*)-**4a** with 13:1, which is almost consistent with the dr of non-isolatable **6** (11:1 dr) (Scheme S2-b2).

*Scheme S2-c:* The reaction mixture from *Scheme S2-a* was purified by quickly flash column chromatography on silica gel (petroleum ether/ ethyl acetate = 6:1), affording the **6** & **7** as a white liquid (21.5 mg, 89% yield, 2:1 to 3:1 dr).

*Scheme S2-d:* Under an argon atmosphere, Rh(COD)<sub>2</sub>OTf (2.34 mg, 5.0 mol%) and **L2** (10.3 mg, 11 mol%) were dissolved in indicated (additives and) solvent, and the resulting solution was stirred for 30 min at RT. Subsequently, the corresponding cocatalyst and **6** & **7** (0.1 mmol, 24.2 mg) were added. The reaction mixture was stirred at either 45 °C or 90 °C for 12 h. After reaction completion, the solvent was evaporated under reduced pressure. The residue was purified by flash column chromatography on silica gel (petroleum ether/ ethyl acetate = 10:1) to afford the product. As the Scheme S2-d1 shown, the reaction was conducted with the cocatalyst of Zn(OTf)<sub>2</sub> (18.2 mg, 50 mol%) in the mixture solvents of DCE (1.0 mL) and CHCl<sub>3</sub> (1.0 mL) at 45 °C. That gave the mixture diastereomers of (*R,R,R*)-**3a** and (*S,R,R*)-**4a** with the dr value of 1:5, in which (*S,R,R*)-**4a** is the major diastereomer. When the reaction was conducted at a higher temperature of 90 °C (Scheme S2-d2), the reaction gave the mixture diastereomers of (*R,R,R*)-**3a** and (*S,R,R*)-**4a** with the dr value of 2:1. The value is closed to that of *isolated* **6** and (*R,R,R*)-**3a** is the major diastereomer.

*Scheme S2-d3:* Under an argon atmosphere, in a reaction tube, Rh(COD)<sub>2</sub>OTf (2.34 mg, 5.0 mol%) and **L2** (10.3 mg, 11 mol%) were dissolved in CHCl<sub>3</sub> (1.0 mL), and the resulting solution was stirred for 30 min at RT. Meanwhile, in another reaction tube, (*R*)-BINOL (6.84 mg, 24 mol%), Sn(OTf)<sub>2</sub> (8.34 mg, 20 mol%), NMM (4.9 mg, 48 mol%) were dissolved in CHCl<sub>3</sub> (1.0 mL) and stirred for 30 min at RT, to give the solution of cocatalyst (*R*)-**LA4**. Then, the solution of cocatalyst (*R*)-**LA4** in CHCl<sub>3</sub>

were added to the first reaction tube. Subsequently, TFE (35 mg, 3.5 eq), **6** (0.1 mmol, 24.2 mg) were added. The reaction mixture was stirred at 45 °C for 12 h. After reaction completion, the solvent was evaporated under reduced pressure. The residue was purified by flash column chromatography on silica gel (petroleum ether/ ethyl acetate = 10:1) to afford the product (*S,R,R*)-**4a** as the single stereoisomer in 93% yield with 93% ee.

## 4.2 Detection of the reaction processes

### 4.2.1 Detection of the reaction processes by <sup>1</sup>H-NMR

**Table S9.** <sup>1</sup>H-NMR detection of the reaction process (General Procedure A) for (*R,R,R*)-**3a** <sup>[a]</sup>

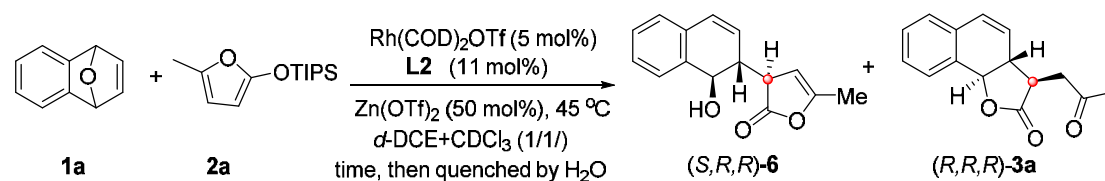

| entry | time (min) | <i>(S,R,R)</i> - <b>6</b> |                   | <b>3a+4a</b>            |                   | <b>1a</b> (%) <sup>[b]</sup> | <b>2a</b> (%) <sup>[b]</sup> |
|-------|------------|---------------------------|-------------------|-------------------------|-------------------|------------------------------|------------------------------|
|       |            | yield(%) <sup>[b]</sup>   | dr <sup>[c]</sup> | yield(%) <sup>[b]</sup> | dr <sup>[d]</sup> |                              |                              |
| 1     | 5          | 33                        | >20:1             | -                       | -                 | 67                           | 60                           |
| 2     | 10         | 31                        | >20:1             | 11                      | >20:1             | 58                           | 59                           |
| 3     | 20         | 25                        | >20:1             | 22                      | >20:1             | 53                           | 54                           |
| 4     | 30         | 28                        | >20:1             | 28                      | >20:1             | 44                           | 52                           |
| 5     | 40         | 9                         | >20:1             | 45                      | >20:1             | 33                           | 49                           |
| 6     | 50         | 6                         | >20:1             | 55                      | >20:1             | 25                           | 47                           |
| 7     | 60         | -                         | -                 | 63                      | >20:1             | 18                           | 46                           |
| 8     | 90         | -                         | -                 | 65                      | >20:1             | 13                           | 45                           |
| 9     | 120        | -                         | -                 | 70                      | >20:1             | -                            | 45                           |
| 10    | 180        | -                         | -                 | 71                      | >20:1             | -                            | 44                           |

[a] As the *General Procedure A* shown: **1a** (0.1 mmol), **2a** (0.5 mmol), Zn(OTf)<sub>2</sub> (50 mol%), Rh(COD)<sub>2</sub>OTf (5 mol%) and **L2** (11 mol%) in the mixture solvent of *d*-DCE (1.0 mL) and CDCl<sub>3</sub> (1.0 mL) react at 45 °C for stirring. At the indicated time, the reaction was monitored after quenching with trace H<sub>2</sub>O. Then, 1,4-benzodioxan as the internal standard was added to the

quenched mixture for the further detection by  $^1\text{H-NMR}$ . [b] NMR yield, 1,4-benzodioxan as the internal standard, was determined by  $^1\text{H NMR}$  spectroscopy. [c] Dr refers to the ratio of (*S,R,R*)-**6** and (*R,R,R*)-**7**, determined by  $^1\text{H NMR}$ . [d] The dr value was determined by  $^1\text{H-NMR}$  spectroscopy and show **3a/4a**.

#### 4.2.2 HRMS (ESI) analysis of reaction solution

Under the General Procedure A, the reaction mixture was stirred for 30 min, then the reaction system was analyzed by high resolution mass spectrometry.

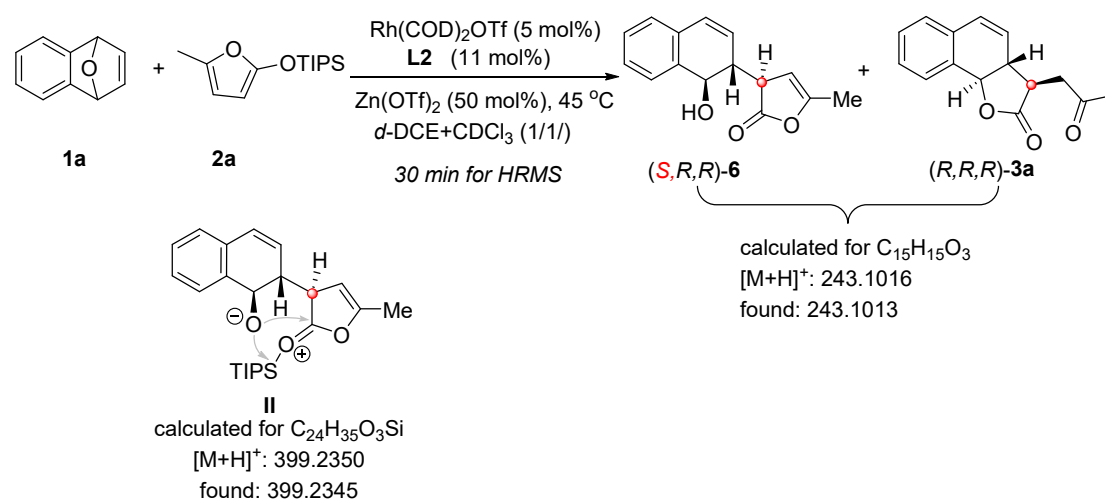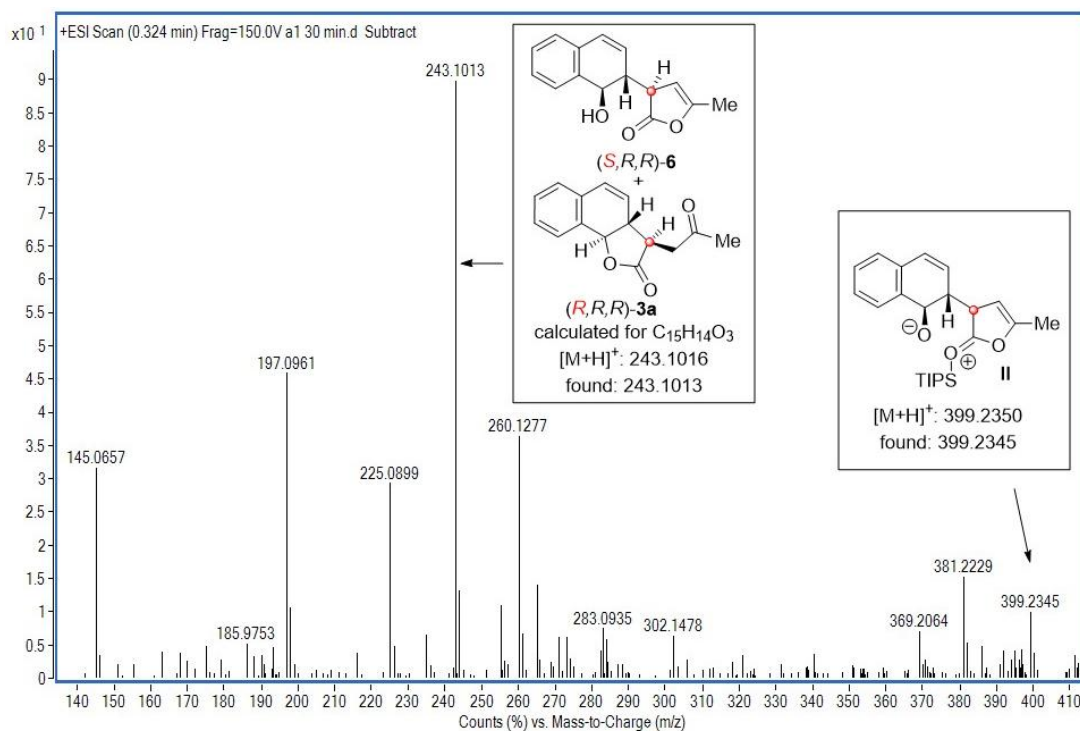

**Figure S2.** HRMS analysis for general procedure A.

**Table S10.**  $^1\text{H-NMR}$  detection of the reaction process (General Procedure B) for  $(S,R,R)$ -**4a** <sup>[a]</sup>

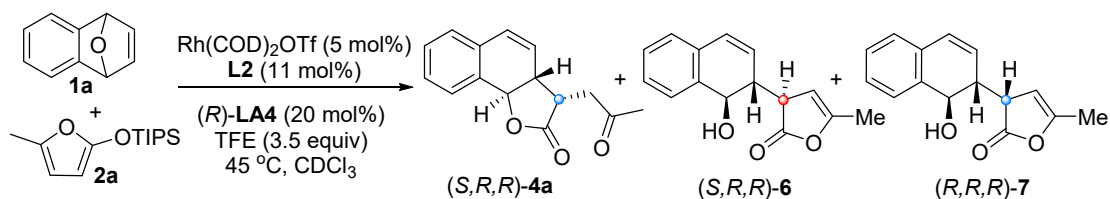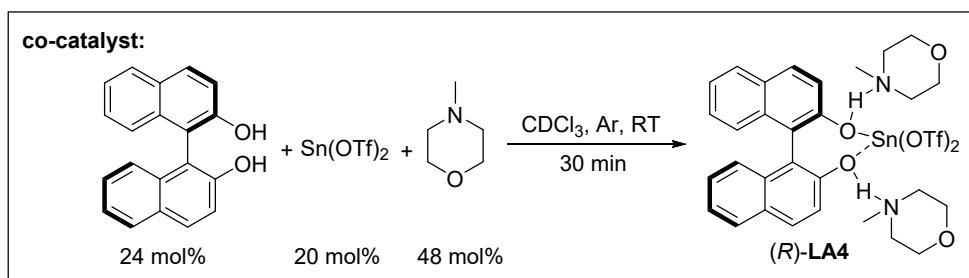

| entry | time (min) | <b>6 &amp; 7</b>        |                   | <b>3a+4a</b>            |                   | <b>1a</b> (%) <sup>[b]</sup> | <b>2a</b> (%) <sup>[b]</sup> |
|-------|------------|-------------------------|-------------------|-------------------------|-------------------|------------------------------|------------------------------|
|       |            | yield(%) <sup>[b]</sup> | dr <sup>[c]</sup> | yield(%) <sup>[b]</sup> | dr <sup>[d]</sup> |                              |                              |
| 1     | 10         | 15                      | >20:1             | -                       | -                 | 78                           | 93                           |
| 2     | 20         | 31                      | 9:1               | -                       | -                 | 56                           | 90                           |
| 3     | 30         | 37                      | 5:1               | -                       | -                 | 48                           | 86                           |
| 4     | 60         | 70                      | 2.5:1             | trace                   | -                 | -                            | 78                           |
| 5     | 120        | 58                      | 1.4:1             | 19                      | <1:20             | -                            | 74                           |
| 6     | 180        | 45                      | 1.5:1             | 32                      | <1:20             | -                            | 74                           |
| 7     | 240        | 38                      | 1.3:1             | 39                      | <1:20             | -                            | 73                           |
| 8     | 300        | 28                      | 1.3:1             | 49                      | <1:20             | -                            | 73                           |
| 9     | 360        | 20                      | 1:1               | 57                      | <1:20             | -                            | 73                           |
| 10    | 420        | 12                      | 1:1               | 65                      | <1:20             | -                            | 73                           |
| 11    | 480        | 6                       | 1:1               | 70                      | <1:20             | -                            | 73                           |
| 12    | 540        | trace                   | -                 | 72                      | <1:20             | -                            | 73                           |
| 13    | 600        | trace                   | -                 | 73                      | <1:20             | -                            | 73                           |
| 14    | 660        | trace                   | -                 | 74                      | <1:20             | -                            | 73                           |
| 15    | 720        | -                       | -                 | 76                      | <1:20             | -                            | 73                           |

[a] General reaction conditions: **1a** (0.1 mmol), **2a** (0.5 mmol),  $\text{Rh}(\text{COD})_2\text{OTf}$  (5 mol%), **L2** (11 mol%), cocatalyst  $(R)$ -**LA4** (20 mol% Lewis acid salt in  $\text{CDCl}_3$ ) and TFE (3.5 equiv) in  $\text{CDCl}_3$  (1.0 mL) under argon atmosphere at  $45\text{ }^\circ\text{C}$ . The solution of cocatalyst was prepared freshly in a separate reaction tube with the  $\text{Sn}(\text{OTf})_2$  (20 mol%),  $(R)$ -BINOL (24 mol%) and NMM (48 mol%) in  $\text{CDCl}_3$  (1.0 mL) at RT for 30 min. [b] NMR yield, 1,4-benzodioxan as the internal standard, determined by  $^1\text{H}$  NMR spectroscopy. [c] Dr of **6 & 7** refers to the ratio of  $(S,R,R)$ -**6** and  $(R,R,R)$ -**7**, determined by  $^1\text{H}$  NMR. [d] The dr value was determined by  $^1\text{H-NMR}$  spectroscopy and show **3a/4a**.

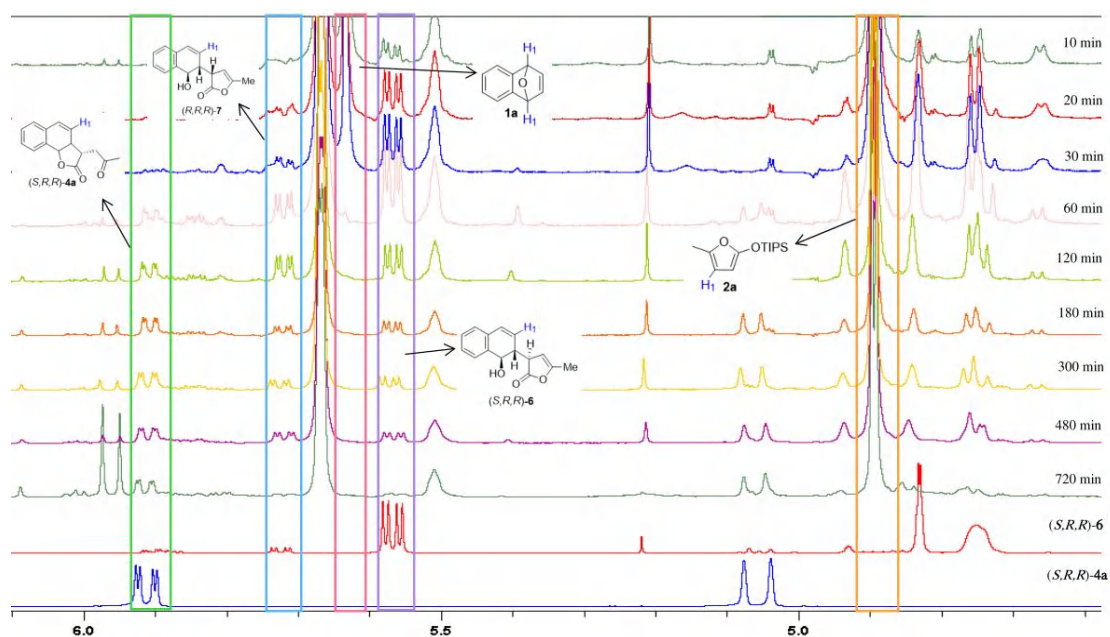

**Figure S3.** Comparison of  $^1\text{H}$ -NMR spectra at different time points in general procedure B.

### 4.3 Deuterium-labeled experiments

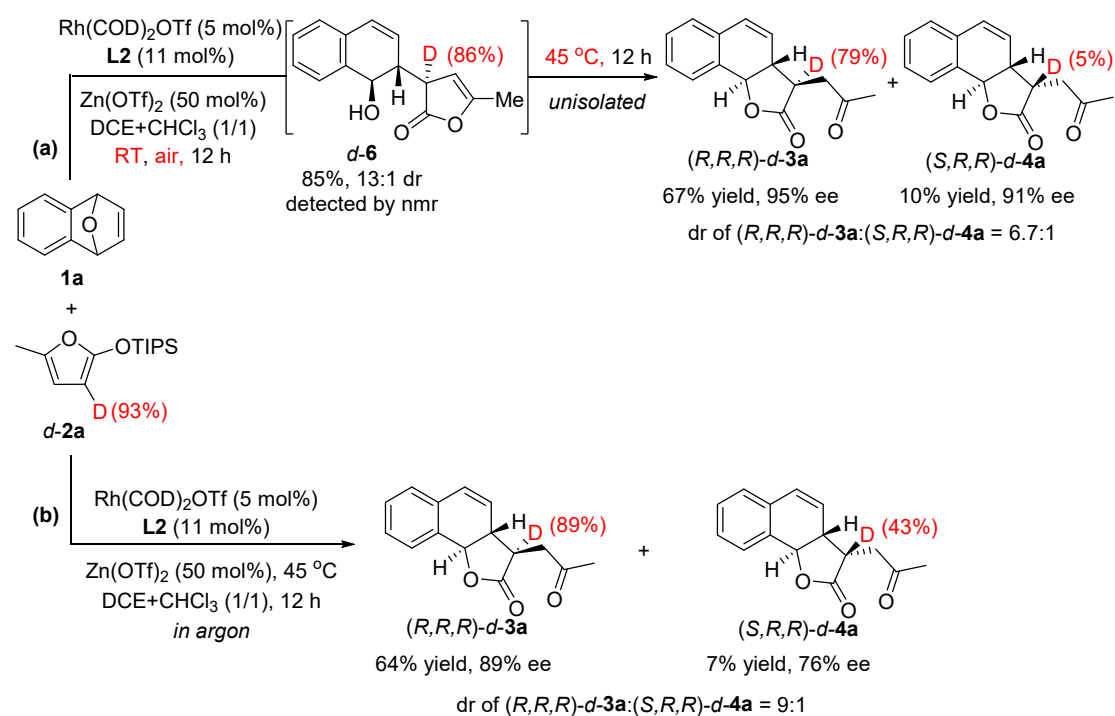

*Path (a):* Under an argon atmosphere,  $\text{Rh}(\text{COD})_2\text{OTf}$  (2.34 mg, 5.0 mol%) and **L2** (10.3 mg, 11 mol%) were dissolved in the mixture solvent of DCE (1.0 mL) and  $\text{CHCl}_3$  (1.0 mL), and the resulting solution was stirred for 30 min at RT. Subsequently,  $\text{Zn}(\text{OTf})_2$  (18.2 mg, 50 mol%), **1a** (14.4 mg, 0.2 mmol) and **d-2a** (128 mg, 0.5 mmol)

were added. The reaction mixture was stirred at RT under air for 12 h. The reaction mixture was directly determined by  $^1\text{H}$  NMR spectroscopy, giving *d-6* in 89% yield with 13:1 dr, when 1,4-benzodioxan was used as the internal standard. Reaction mixture was further stirred and heated at 45 °C for 12 h. After reaction completion, the solvent was evaporated under reduced pressure. The residue was purified by flash column chromatography on silica gel (petroleum ether/ ethyl acetate = 10:1) to afford the product.

*Path (b)*: Under an argon atmosphere,  $\text{Rh}(\text{COD})_2\text{OTf}$  (2.34 mg, 5.0 mol%) and **L2** (10.3 mg, 11 mol%) were dissolved in the mixture solvent of DCE (1.0 mL) and  $\text{CHCl}_3$  (1.0 mL), and the resulting solution was stirred for 30 min at RT. Subsequently,  $\text{Zn}(\text{OTf})_2$  (18.2 mg, 50 mol%), **1a** (14.1 mg, 0.1 mmol) and *d-2a* (128 mg, 0.5 mmol) were added. The reaction mixture was stirred at 45 °C for 12 h. After reaction completion, the solvent was evaporated under reduced pressure. The residue was purified by flash column chromatography on silica gel (petroleum ether/ ethyl acetate = 10:1) to afford the product.

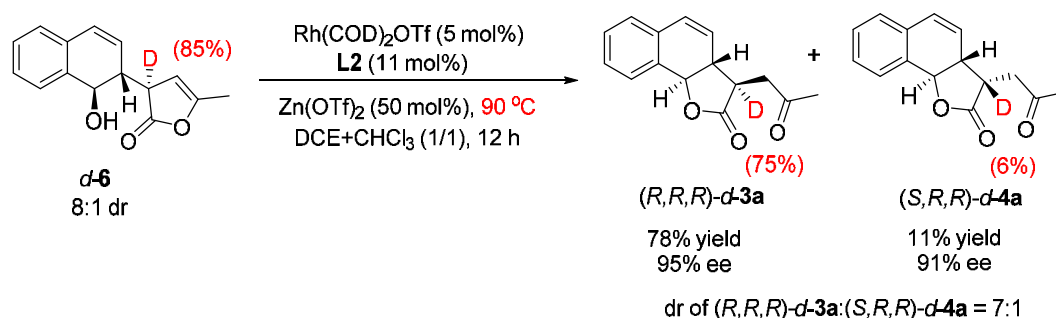

Under an argon atmosphere,  $\text{Rh}(\text{COD})_2\text{OTf}$  (2.34 mg, 5.0 mol%) and **L2** (10.3 mg, 11 mol%) were dissolved in the mixture solvent of DCE (1.0 mL) and  $\text{CHCl}_3$  (1.0 mL), and the resulting solution was stirred for 30 min at RT. Subsequently,  $\text{Zn}(\text{OTf})_2$  (18.2 mg, 50 mol%), *d-6* (0.1 mmol, 24.2 mg, 8:1 dr) were added. The reaction mixture was stirred at 90 °C for 12 h. After reaction completion, the solvent was evaporated under reduced pressure. The residue was purified by flash column chromatography on silica gel (petroleum ether/ ethyl acetate = 10:1) to afford the product.

#### 4.4 Linear effect study

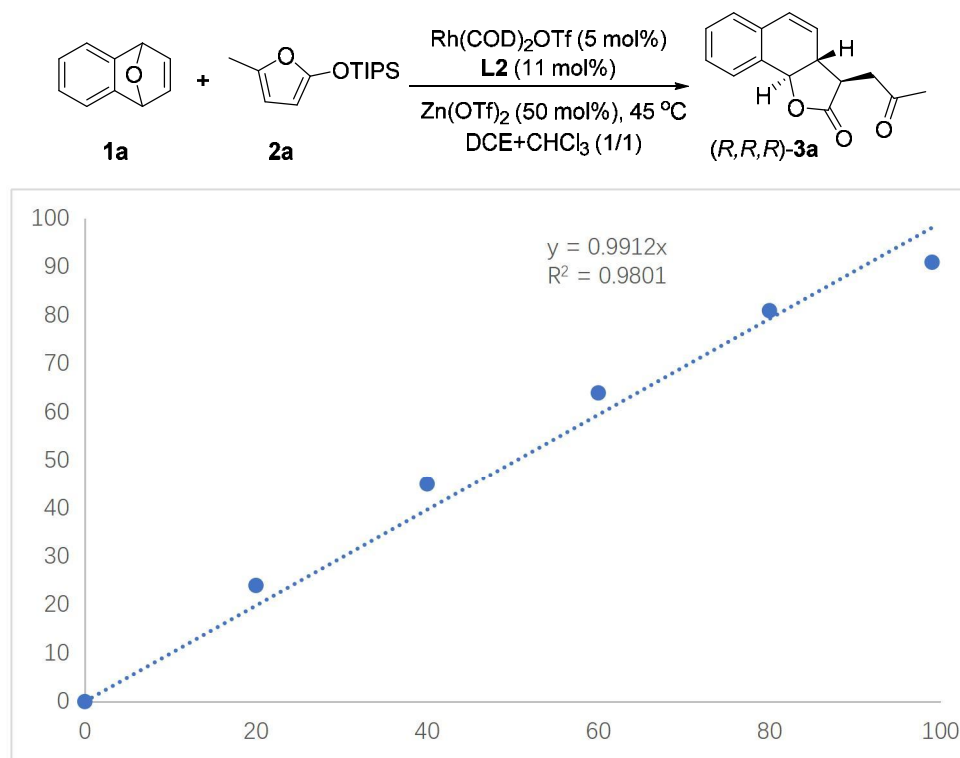

| L2 (ee,%)         | 0 | 20 | 40 | 60 | 80 | 99 |
|-------------------|---|----|----|----|----|----|
| (R,R,R)-3a (ee,%) | 0 | 24 | 45 | 64 | 81 | 91 |

Under an argon atmosphere, Rh(COD)<sub>2</sub>OTf (2.34 mg, 5.0 mol%) and enantiomeric composition of **L2** (10.3 mg, 11 mol%) were dissolved in the mixture solvents of DCE (1.0 mL) and CHCl<sub>3</sub> (1.0 mL) and the resulting solution was stirred for 30 min at RT. Subsequently, Zn(OTf)<sub>2</sub> (18.2 mg, 50 mol%), **1a** (0.1 mmol) and **2a** (0.5 mmol) were added. The reaction mixture was stirred under argon atmosphere at 45 °C for 12 h. After reaction completion, the solvent was evaporated under reduced pressure. The residue was purified by flash column chromatography on silica gel (petroleum ether/ ethyl acetate = 10:1) to afford **(R,R,R)-3a**.

#### 4.5 Thermal stability investigation

##### 4.5.1 Thermal stability investigation for **(R,R,R)-3a** and **(S,R,R)-4a** under standard conditions

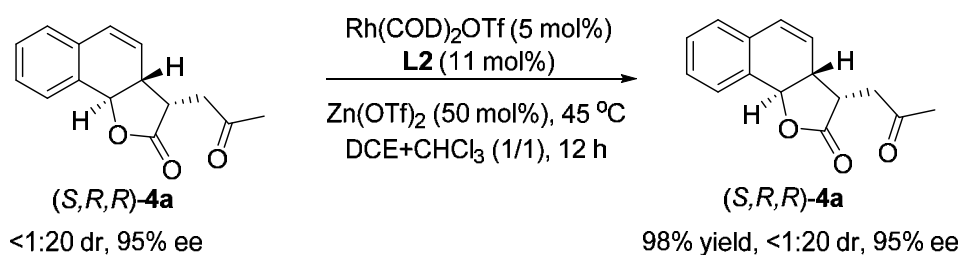

Under an argon atmosphere, Rh(COD)<sub>2</sub>OTf (2.34 mg, 5.0 mol%) and **L2** (10.3 mg, 11 mol%) were dissolved in DCE+CHCl<sub>3</sub> (1.0+1.0 mL) and the resulting solution was stirred for 30 min at RT. Subsequently, Zn(OTf)<sub>2</sub> (18.2 mg, 50 mol%), (*S,R,R*)-**4a** (24.2 mg, 0.1 mmol) were added. The reaction mixture was stirred at 45 °C for 12 h. After reaction completion, the solvent was evaporated under reduced pressure. The residue was purified by flash column chromatography on silica gel (petroleum ether/ethyl acetate = 10:1) to afford the product (white solid, 23.7 mg, 98% yield, <1:20 dr, 95% ee).

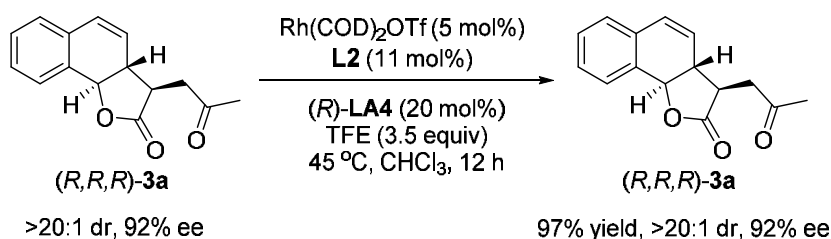

**co-catalyst:**

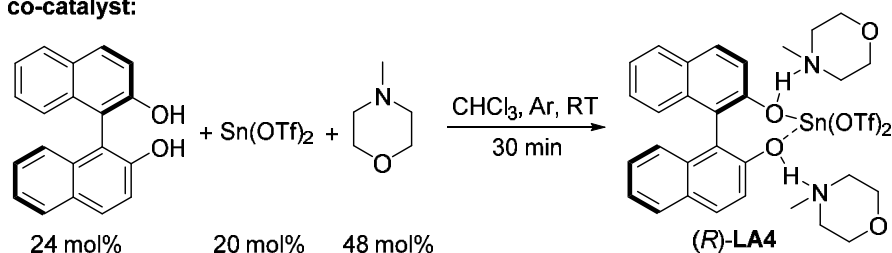

In a reaction tube, Rh(COD)<sub>2</sub>OTf (2.34 mg, 5.0 mol%) and **L2** (10.3 mg, 11 mol%) were dissolved in CHCl<sub>3</sub> (1.0 mL) and the resulting solution was stirred for 30 min at RT. In another reaction tube, (*R*)-BINOL (6.84 mg, 24 mol%), Sn(OTf)<sub>2</sub> (8.34 mg, 20 mol%), NMM (4.9 mg, 48 mol%) were dissolved in CHCl<sub>3</sub> (1.0 mL) and stirred for 30 min at RT, to give the solution of cocatalyst (*R*)-**LA4**. Then, the solution of cocatalyst (*R*)-**LA4** in CHCl<sub>3</sub> were added to the first reaction tube. Subsequently, TFE (35 mg, 3.5 equiv) and (*R,R,R*)-**3a** were added. The reaction mixture was stirred at 45 °C for 12 h. After reaction completion, the solvent was evaporated under reduced pressure. The residue was purified by flash column chromatography on silica

gel (petroleum ether/ ethyl acetate = 10:1) to afford the product (white solid, 23.7 mg, 98% yield, >20:1 dr, 95% ee).

#### 4.5.2 Base-assisted C $\alpha$ -epimerization between (*R,R,R*)-**3a** and (*S,R,R*)-**4a**

**Table S11.** Base-assisted C $\alpha$ -epimerization of (*S,R,R*)-**4a** <sup>[a]</sup>

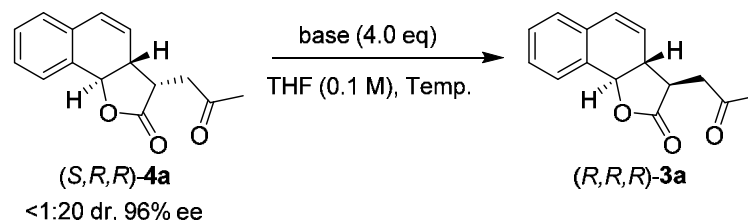

| entry | base   | temp. (°C) | time (h) | Product of <b>3a+4a</b>  |                   |                       |
|-------|--------|------------|----------|--------------------------|-------------------|-----------------------|
|       |        |            |          | yield (%) <sup>[b]</sup> | dr <sup>[c]</sup> | ee (%) <sup>[d]</sup> |
| 1     | LiHMDS | -78        | 5        | >99                      | <1:20             | -/96                  |
| 2     | LiHMDS | RT         | 12       | 88                       | 1:4               | 96/96                 |
| 3     | LiHMDS | 70         | 6        | 48                       | 1:1.3             | 96/96                 |
| 4     | LiHMDS | 70         | 24       | 45                       | 1:1.3             | 96/96                 |
| 5     | LiHMDS | 90         | 24       | 43                       | 15:1              | 97/96                 |
| 6     | LDA    | RT         | 12       | decomposed               | -                 | -                     |
| 7     | KHMDS  | 70         | 24       | decomposed               | -                 | -                     |
| 8     | DBU    | 70         | 24       | decomposed               | -                 | -                     |

[a] General reaction conditions: (*S,R,R*)-**4a** is dissolved in THF and subsequently added base under argon atmosphere. [b] Yield of isolated product refers to the total yield **3a+4a**. [c] The dr value was determined by <sup>1</sup>H-NMR spectroscopy and show **3a/4a**. [d] The ee value of **3a** or **4a** was determined by HPLC analysis on a chiral stationary phase and show **3a/4a**.

**Table S12.** Base-assisted C $\alpha$ -epimerization of (*R,R,R*)-**3a** <sup>[a]</sup>

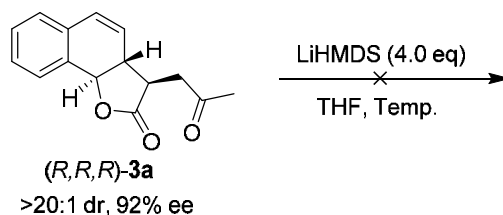

| entry | base   | temp. (°C) | time (h) | Product of <b>3a+4a</b>  |                   |                       |
|-------|--------|------------|----------|--------------------------|-------------------|-----------------------|
|       |        |            |          | yield (%) <sup>[b]</sup> | dr <sup>[c]</sup> | ee (%) <sup>[d]</sup> |
| 1     | LiHMDS | -78        | 5        | 100                      | >20:1             | 92/-                  |
| 2     | LiHMDS | RT         | 12       | 98                       | >20:1             | 92/-                  |
| 3     | LiHMDS | 70         | 6        | 90                       | >20:1             | 92/-                  |
| 4     | LiHMDS | 90         | 24       | 85                       | >20:1             | 92/-                  |

[a] General reaction conditions: (*R,R,R*)-**3a** is dissolved in THF and subsequently added LiHMDS under argon atmosphere. [b] Yield of isolated product refers to the total yield **3a+4a**. [c] The dr value was determined by <sup>1</sup>H-NMR spectroscopy and show **3a/4a**. [d] The ee value of **3a** or **4a** was determined by HPLC analysis on a chiral stationary phase and show **3a/4a**.

## 4.6 Computational details

All of the calculations were performed using the Gaussian 16 program.<sup>3</sup> Structures were optimized at the (U)B3LYP level of density functional theory<sup>4</sup> with Grimme's D3(BJ) dispersion correction<sup>5</sup> in gas phase. For optimizations, Ahlrichs's def2SVP basis set was used for all atoms.<sup>6</sup> Frequency calculations have been performed to verify the optimized structures as local minima or transition state and to obtain Gibbs free energy at 298 K. Intrinsic reaction coordinate (IRC) calculations were carried out to make sure that every transition state links relevant intermediates.<sup>7</sup> The electronic energies were further refined by carrying out single-point energy calculations using (U)B3LYP functional with Grimme's D3(BJ) dispersion correction. The def2TZVP basis set was applied for all atoms.<sup>6</sup> The SMD solvation model with chloroform as the solvent was employed to account for solvation effect.<sup>8-10</sup>

## Additional computational results

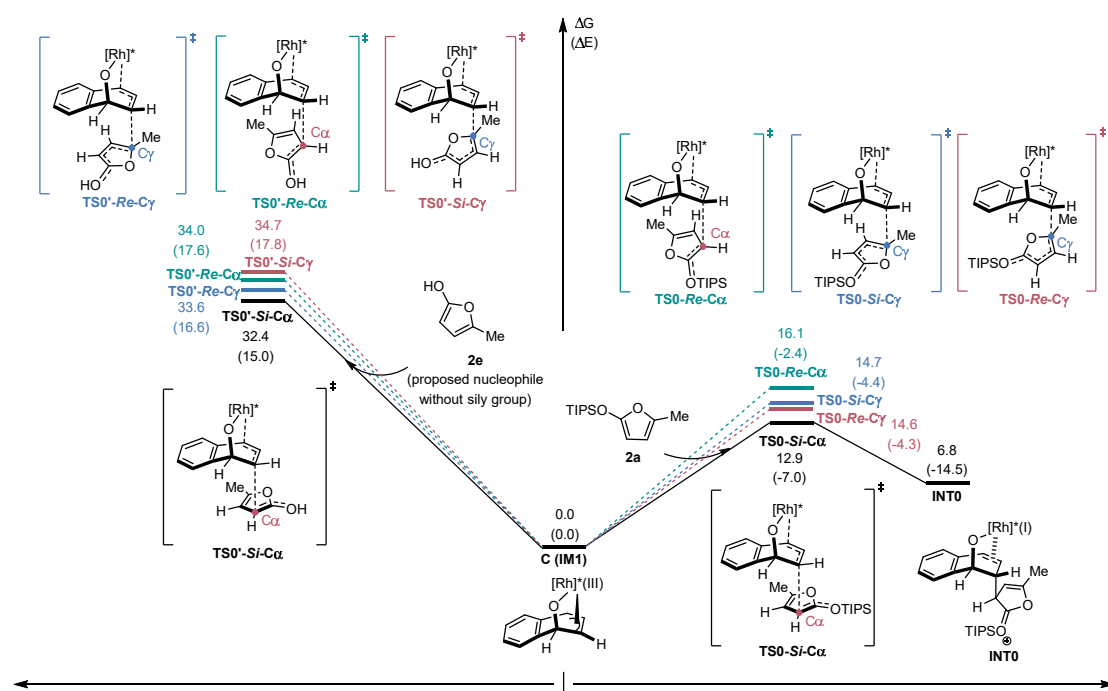

**Figure S4.** Calculated energy profiles for nucleophilic attack of **2a** or **2e** at C at the B3LYP-D3(BJ)/PCM(chloroform)/def2TZVP level of theory.

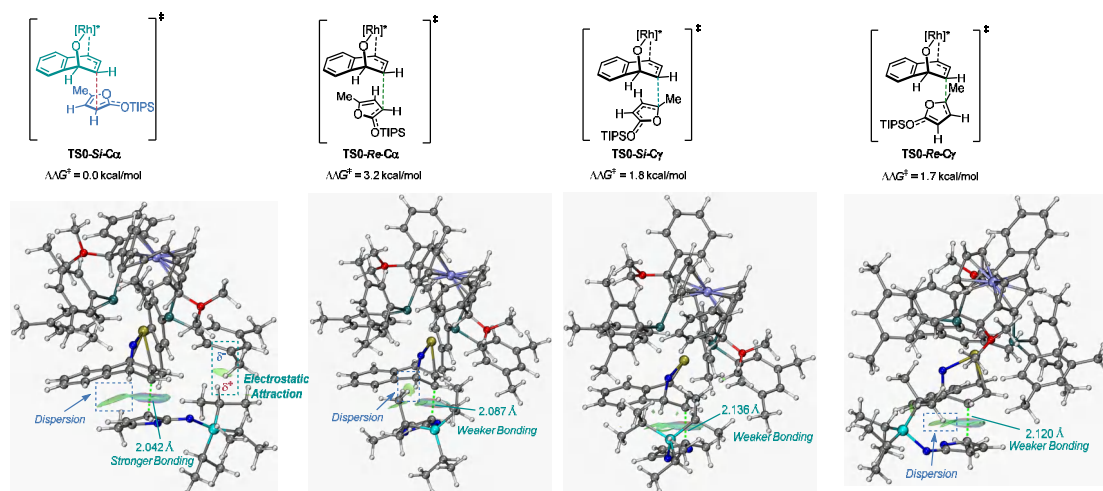

**Figure S5.** IGMH analysis for stereo-determining and regio-determining transition states in the nucleophilic attack process. Stronger non-covalent interaction between catalyst and **2a** was discovered in the most favorable transition state **TS0-Si-C $\alpha$** . The calculations were performed at the B3LYP-D3(BJ)/PCM/def2TZVP level of theory.

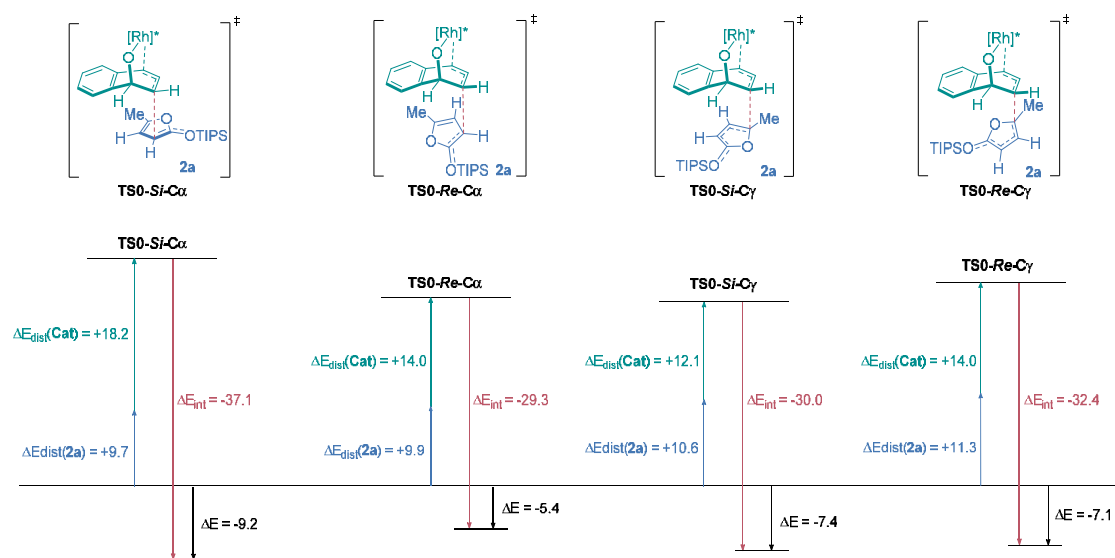

**Figure S6.** Distortion/interaction (DI) analysis on stereo-determining and regio-determining transition states in the nucleophilic attack process indicate that the interactions between catalyst and substrate **2a** dominates the energy difference among different TSs. The DI analysis was performed based on the calculations at the B3LYP-D3(BJ)/def2TZVP level of theory. Energies are given in kcal/mol.

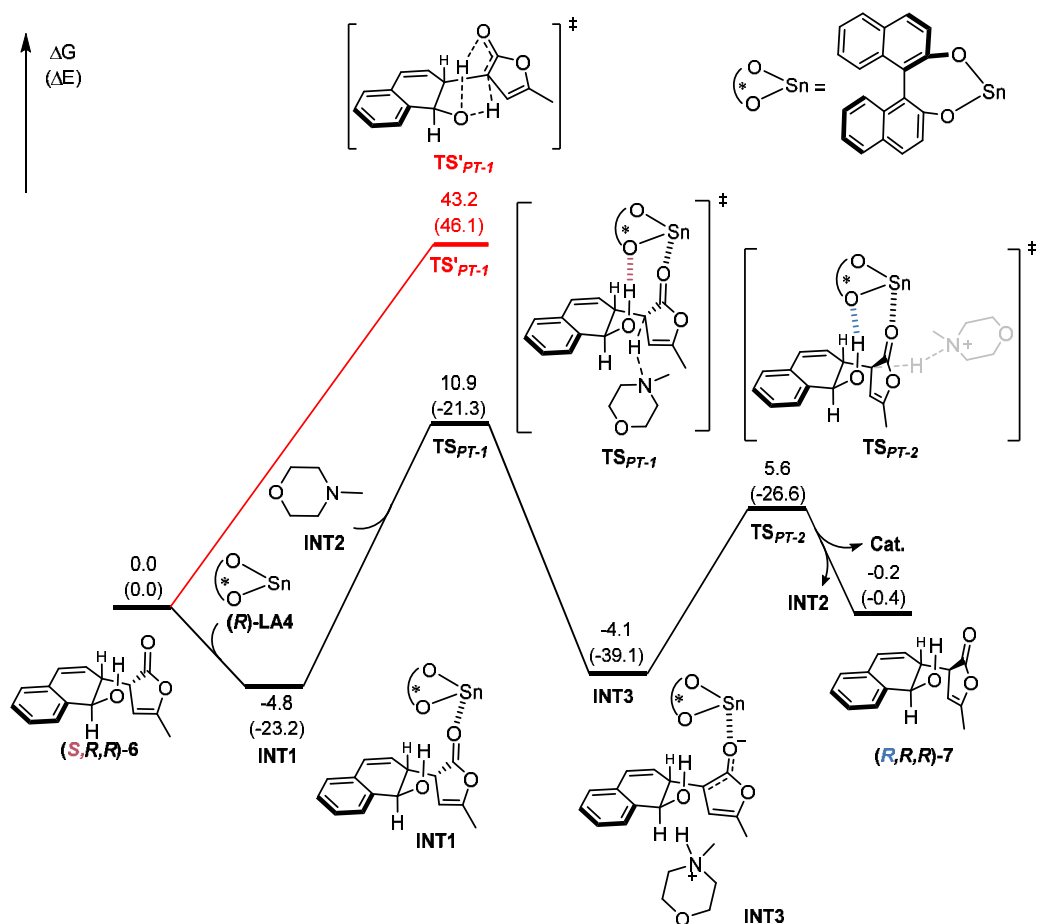

**Figure S7.** Calculated energy profiles on the isomerization. All energies are given in kcal/mol.

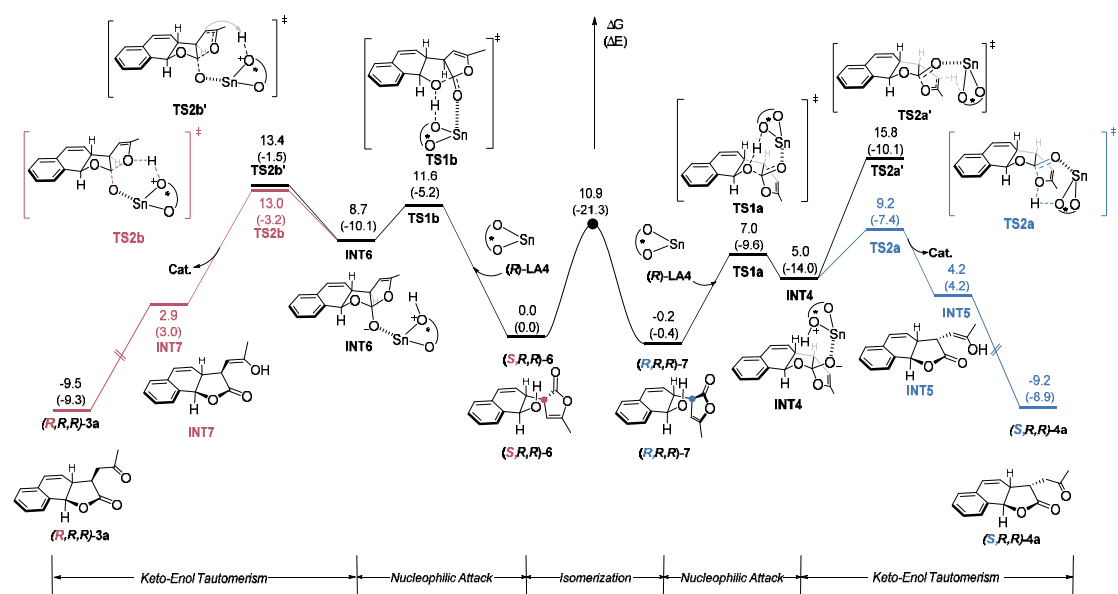

**Figure S8.** Computational studies for the diastereodivergent synthesis. All energies are given in kcal/mol.

Density functional theory (DFT) calculations validate the proposed mechanism of the epimerization/lactonization process ((S,R,R)-6 → (R,R,R)-7 → (S,R,R)-4a),

thereby elucidating the observed diastereoselective reversal. DFT results confirm that the combined catalyst (*R*)-**LA4** acts as a multifunctional catalytic system, integrating the capabilities of both a Lewis acid and a proton-transfer catalyst across the process. It facilitates epimerization via the key transition state **TSPT-1** (*(S,R,R)*-**6** to *(R,R,R)*-**7**) and lactonization via **TS1a** and **TS2a**, ultimately yielding the product *(S,R,R)*-**4a**. Computational data indicate that these two diastereomers **6** and **7** are thermodynamically similar, which is consistent with the experimental observation that the epimerization from **6** to **7** occurs relatively easily while maintaining a consistently low dr. Conversely, the pathway from **6** to *(R,R,R)*-**3a** was calculated to be disfavored in energy. Additionally, both non-covalent interaction (NCI) analysis and distortion/interaction analysis of the highest energy transition states reveal that a significantly stronger interactions between the substrate and catalyst (*R*)-**LA4** presents in the favored transition state **TS2a**, compared to **TS2b**.

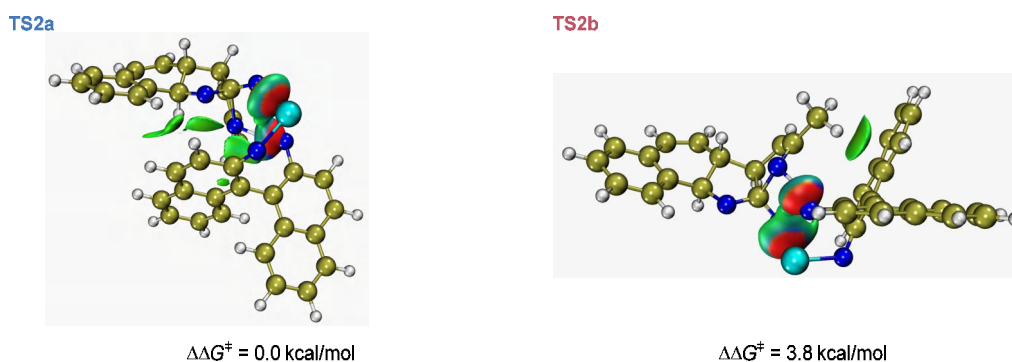

**Figure S9.** IGM analysis for enantio-determining transition states reveals that the prominent lone-pair- $\pi$  interaction between oxygen and naphthalene solely exists in **TS2a**.

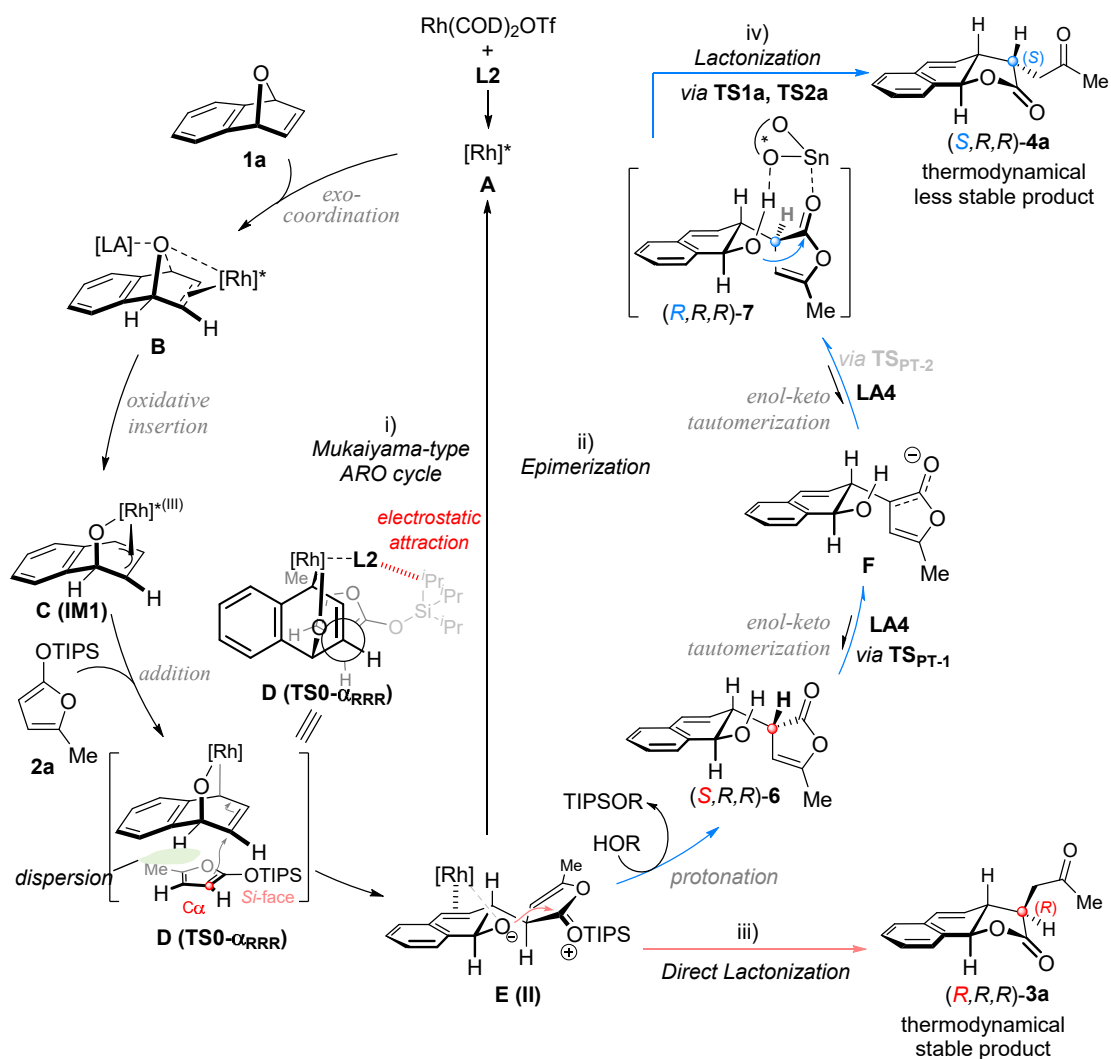

Figure S10. Possible reaction mechanism.

### XYZ coordinate

| 2a  |                |             |             | E |             |             |             |
|-----|----------------|-------------|-------------|---|-------------|-------------|-------------|
| E = | -989.527574588 | G =         | -989.199814 | 1 | -0.42751200 | -0.59622000 | 2.07352300  |
| 6   | 1.59176500     | -0.89229700 | -0.26559000 | 6 | -3.66665300 | 0.24283100  | -1.06262600 |
| 6   | 2.22948400     | -1.56876900 | 0.73800800  | 1 | -4.37039100 | 0.24058800  | -1.91235600 |
| 6   | 3.57849700     | -1.06279000 | 0.75269100  | 1 | -4.04664600 | -0.48534200 | -0.32810900 |
| 6   | 3.66493400     | -0.12122400 | 0.23314200  | 1 | -3.71655700 | 1.23889600  | -0.59648000 |
| 8   | 2.44693600     | -0.01579500 | -0.86234700 | 6 | -2.22741800 | -1.51838800 | -2.18314500 |
| 1   | 1.78737700     | -2.32784100 | 1.37729000  | 1 | -2.93098100 | -1.55808800 | -3.03252100 |
| 1   | 4.38617900     | -1.36658800 | 1.41559800  | 1 | -1.22529400 | -1.77845800 | -2.55177800 |
| 8   | 0.35107300     | -0.91877200 | -0.73721900 | 1 | -2.53060000 | -2.30250600 | -1.47092300 |
| 6   | 4.75779000     | 0.74990900  | -0.73595900 | 6 | 0.63893500  | 2.07392600  | 1.14931100  |
| 1   | 4.49452200     | 1.81853100  | -0.65675900 | 1 | 1.44646800  | 1.33044600  | 1.22028000  |
| 1   | 5.67111100     | 0.57658000  | -0.14993700 | 1 | 1.11044200  | 3.07050600  | 1.09979700  |
| 1   | 4.98439700     | 0.54602000  | -1.79649100 | 1 | 0.06866500  | 2.03315200  | 2.09154900  |
| 14  | -0.94278300    | 0.06946900  | -0.16917600 | 6 | -1.35800300 | 2.92669900  | -0.16299400 |
| 6   | -2.24896400    | -0.12755500 | -1.52863700 | 1 | -1.95609200 | 2.83871300  | -1.08310600 |
| 1   | -1.94280900    | 0.60658200  | -2.29890000 | 1 | -2.05399600 | 2.88524600  | 0.69106900  |
| 6   | -0.27106300    | 1.84402200  | -0.06896700 | 1 | -0.90611200 | 3.93356500  | -0.16072400 |
| 1   | 0.36041900     | 1.91916100  | -0.97423500 | 6 | -2.40263800 | 0.20909400  | 2.32581100  |
| 6   | -1.39263200    | -0.63429600 | 1.53270600  | 1 | -2.07470000 | 1.25331600  | 2.44222900  |
|     |                |             |             | 1 | -3.39043300 | 0.22615500  | 1.83959000  |

|          |                |             |              |   |             |             |             |
|----------|----------------|-------------|--------------|---|-------------|-------------|-------------|
| 1        | -2.54745900    | -0.20378400 | 3.33910000   | 6 | 7.23940200  | 1.17294500  | -0.85342500 |
| 6        | -1.82091900    | -2.10758800 | 1.45486500   | 1 | 7.99483500  | 0.93913100  | -0.08641400 |
| 1        | -1.09848700    | -2.71368500 | 0.88675000   | 1 | 7.76463200  | 1.20681000  | -1.82224900 |
| 1        | -1.91339300    | -2.54747700 | 2.46280200   | 1 | 6.84633100  | 2.17900500  | -0.64879800 |
| 1        | -2.80191700    | -2.21495300 | 0.96372700   | 6 | 0.97192100  | 5.24393300  | -1.82249900 |
| <b>C</b> |                |             |              |   |             |             |             |
| E =      | -4955.28457767 | G =         | -4954.120258 | 1 | 1.54272400  | 5.69336200  | -0.99569600 |
| 6        | 2.43694800     | 1.95356300  | 1.73743400   | 1 | 0.99372000  | 5.94302600  | -2.66998100 |
| 6        | -1.12295400    | 2.19920600  | 1.76752000   | 1 | -0.06782800 | 5.16410500  | -1.46937600 |
| 6        | -1.18682100    | 0.76745500  | 1.55666400   | 6 | 3.03341500  | 2.20272500  | -5.28908600 |
| 6        | -1.06372900    | 0.14454700  | 2.84945500   | 1 | 2.24118200  | 2.38373200  | -6.03406800 |
| 6        | -0.90972500    | 1.15644100  | 3.83116000   | 1 | 3.85318300  | 2.90268200  | -5.51665200 |
| 6        | -0.93471600    | 2.41165600  | 3.16829600   | 1 | 3.40922200  | 1.18020200  | -5.43530900 |
| 15       | -1.44682700    | -0.32231700 | 0.10835000   | 6 | -5.66345200 | 0.78298100  | -2.93371200 |
| 15       | 2.04040300     | 0.12224600  | -0.53917900  | 1 | -6.02003600 | 1.39120700  | -3.77700700 |
| 6        | -2.22976300    | 0.58878100  | -1.28899500  | 1 | -5.86457000 | -0.27535700 | -3.17038700 |
| 6        | -2.84087300    | -1.37065000 | 0.69903400   | 1 | -6.26874200 | 1.03450500  | -2.04860800 |
| 6        | -3.20414000    | -2.49941400 | -0.04320300  | 6 | -1.17875100 | 2.69312200  | -4.29668100 |
| 6        | -4.31364000    | -3.27648900 | 0.32542100   | 1 | -0.96340000 | 3.69697200  | -3.89495900 |
| 6        | -5.06345900    | -2.89033400 | 1.43994700   | 1 | -0.20624700 | 2.21281800  | -4.47397200 |
| 6        | -4.74573000    | -1.74054600 | 2.18017300   | 1 | -1.68732600 | 2.82286100  | -5.26254900 |
| 6        | -3.63294700    | -0.98725500 | 1.79715500   | 6 | -5.58549900 | -1.33480000 | 3.36468100  |
| 6        | -1.44812800    | 1.31779700  | -2.19369800  | 1 | -5.27371800 | -0.35982900 | 3.76625200  |
| 6        | -2.01949300    | 1.89629000  | -3.33429600  | 1 | -6.65201600 | -1.26900100 | 3.09654700  |
| 6        | -3.39115900    | 1.71703100  | -3.56233700  | 1 | -5.50374000 | -2.07437800 | 4.17857100  |
| 6        | -4.19533700    | 0.99816800  | -2.67128800  | 6 | -4.67223300 | -4.50157000 | -0.47517900 |
| 6        | -3.60157600    | 0.44145700  | -1.53043900  | 1 | -5.55110800 | -5.01457900 | -0.05966300 |
| 26       | 0.60605300     | 1.20877000  | 2.42887400   | 1 | -4.88773000 | -4.23913100 | -1.52254100 |
| 6        | 2.12993900     | 0.66853600  | 1.18493400   | 1 | -3.83367600 | -5.21577300 | -0.49394600 |
| 6        | 2.46120200     | 1.83213400  | 3.15276500   | 1 | -1.07298800 | -0.92166600 | 3.03914300  |
| 6        | 1.98922100     | -0.26858800 | 2.28273100   | 6 | 1.75967100  | -1.75562100 | 2.11118800  |
| 6        | 2.19923800     | 0.47294600  | 3.48831400   | 1 | 1.10610300  | -1.84726200 | 1.19071400  |
| 1        | -2.62292200    | -2.78514400 | -0.91102800  | 6 | -1.44303700 | 3.30821200  | 0.78685700  |
| 1        | -3.40431100    | -0.08435000 | 2.35785400   | 1 | -0.82492400 | 3.15859900  | -0.11318200 |
| 1        | -0.38093000    | 1.42985100  | -2.02543100  | 7 | -2.81301800 | 3.16935500  | 0.31883100  |
| 1        | -4.22350100    | -0.12775500 | -0.84170000  | 6 | -1.05951300 | 4.67315700  | 1.37283500  |
| 1        | -0.75770600    | 0.98869800  | 4.89542000   | 6 | 0.29101900  | 5.01065600  | 1.54802700  |
| 1        | -0.82498100    | 3.38720400  | 3.63408000   | 6 | -2.02746600 | 5.60105700  | 1.77599100  |
| 1        | 2.62268600     | 2.64479900  | 3.85834800   | 6 | 0.66723900  | 6.23548700  | 2.09947100  |
| 1        | 2.11913000     | 0.07919900  | 4.49679500   | 1 | 1.06061300  | 4.29352300  | 1.26840200  |
| 1        | 2.62701000     | 2.86222700  | 1.17587000   | 6 | -1.65749700 | 6.83285700  | 2.32687100  |
| 1        | -5.92837800    | -3.49156300 | 1.73564300   | 1 | -3.08394500 | 5.36578900  | 1.66393100  |
| 1        | -3.84242400    | 2.14828900  | -4.46012100  | 6 | -0.30979800 | 7.15662900  | 2.48991700  |
| 45       | 0.42179100     | -1.56022800 | -0.66663000  | 1 | 1.72643900  | 6.47260500  | 2.22670200  |
| 6        | 3.77810200     | -0.45361700 | -0.79135100  | 1 | -2.43141100 | 7.54131800  | 2.63101400  |
| 6        | 4.11246300     | -1.80282700 | -0.91599000  | 1 | -0.02102200 | 8.11814900  | 2.91995200  |
| 6        | 4.79676800     | 0.51183000  | -0.76214300  | 6 | -3.17736200 | 3.98011800  | -0.81736600 |
| 6        | 5.45118200     | -2.20543600 | -1.02949500  | 1 | -3.43924100 | 5.02908800  | -0.56602000 |
| 1        | 3.33418700     | -2.55840000 | -0.89662300  | 1 | -2.34634300 | 4.00782500  | -1.53731600 |
| 6        | 6.14137600     | 0.14038100  | -0.86939000  | 1 | -4.04262900 | 3.53080500  | -1.32853900 |
| 1        | 4.54581500     | 1.56991900  | -0.66109800  | 6 | -3.89716800 | 2.87400100  | 1.22571700  |
| 6        | 6.44717900     | -1.22271800 | -1.00670600  | 1 | -4.65877600 | 2.26671600  | 0.70404900  |
| 1        | 7.49506000     | -1.52449200 | -1.09715500  | 1 | -3.53780100 | 2.28895100  | 2.08155100  |
| 6        | 2.02062600     | 1.57544200  | -1.65214100  | 1 | -4.41585500 | 3.76803800  | 1.63097100  |
| 6        | 1.52529200     | 2.83028400  | -1.29280000  | 7 | 2.99067000  | -2.44692300 | 1.77674000  |
| 6        | 2.50238200     | 1.37076100  | -2.95850200  | 6 | 0.92626000  | -2.44555300 | 3.18459900  |
| 6        | 1.52387300     | 3.89679600  | -2.21000100  | 6 | -0.25393900 | -3.10924500 | 2.81787100  |
| 1        | 1.12151700     | 2.98200600  | -0.29683900  | 6 | 1.34268400  | -2.49717000 | 4.52322600  |
| 6        | 2.51626900     | 2.41186500  | -3.88966600  | 6 | -1.03633900 | -3.75505500 | 3.77794400  |
| 1        | 2.90632700     | 0.39833600  | -3.24730700  | 1 | -0.56669800 | -3.12614500 | 1.77079900  |
| 6        | 2.03144500     | 3.66904900  | -3.49168700  | 6 | 0.56349500  | -3.14878900 | 5.48309200  |
| 1        | 2.03748000     | 4.49103900  | -4.21289300  | 1 | 2.28339400  | -2.03600200 | 4.82608700  |
| 6        | 5.80962400     | -3.66628200 | -1.13895900  | 6 | -0.63472400 | -3.76883300 | 5.11612900  |
| 1        | 6.62946900     | -3.82866800 | -1.85487700  | 1 | -1.96118600 | -4.24941400 | 3.47227100  |
| 1        | 6.14669200     | -4.06536900 | -0.16704800  | 1 | 0.89636800  | -3.17426400 | 6.52334400  |
| 1        | 4.94993400     | -4.27163300 | -1.46198200  | 1 | -1.24395200 | -4.27294000 | 5.86967600  |
|          |                |             |              | 6 | 2.82068600  | -3.85970900 | 1.51190500  |
|          |                |             |              | 1 | 3.71373500  | -4.24278600 | 0.99433000  |

|   |             |             |             |    |             |             |             |
|---|-------------|-------------|-------------|----|-------------|-------------|-------------|
| 1 | 2.66596000  | -4.46980300 | 2.42422700  | 1  | -7.04354300 | -0.82063200 | 1.33191700  |
| 1 | 1.94614300  | -4.01231700 | 0.86002600  | 1  | -6.22214500 | -1.38158300 | -0.94598800 |
| 6 | 4.20344400  | -2.11512800 | 2.49361200  | 6  | -3.64353400 | -1.55222600 | -1.71892100 |
| 1 | 4.24287200  | -2.52632500 | 3.52431600  | 6  | -1.77127700 | -0.91209800 | 0.32162500  |
| 1 | 5.06316600  | -2.52316000 | 1.93970400  | 1  | -2.98032800 | -0.40104300 | 2.71079100  |
| 1 | 4.33621200  | -1.02680600 | 2.54521000  | 1  | -5.40113000 | -0.35570300 | 3.16301900  |
| 6 | -1.20056900 | -3.61914500 | -2.74265600 | 6  | -1.34923000 | -1.32727400 | -0.94262100 |
| 6 | -2.26703400 | -4.41205200 | -3.15044100 | 6  | -2.29451600 | -1.63469700 | -1.96066700 |
| 1 | -2.31882500 | -5.45693600 | -2.83456900 | 1  | -1.90775100 | -1.92517100 | -2.93981600 |
| 6 | -3.29143700 | -3.86086200 | -3.93538900 | 6  | -0.77891500 | -0.46982400 | 1.34375000  |
| 1 | -4.12917800 | -4.48616400 | -4.25218900 | 6  | -0.78940500 | 0.88136100  | 1.83772400  |
| 6 | -3.24898000 | -2.51291600 | -4.29714200 | 6  | 0.17521400  | -1.36512000 | 1.83459300  |
| 1 | -4.05298600 | -2.80290000 | -4.89649400 | 6  | 0.16652600  | 1.28767800  | 2.82952400  |
| 6 | -2.16924000 | -1.71351700 | -3.90627400 | 6  | -1.71980000 | 1.85643200  | 1.37978200  |
| 1 | -2.12796100 | -0.66443200 | -4.19964800 | 6  | 1.12735500  | -0.94166900 | 2.80824300  |
| 6 | -1.13439500 | -2.26505100 | -3.14479800 | 6  | 1.12238900  | 0.34220100  | 3.29161900  |
| 6 | 0.07539900  | -1.50628300 | -2.77265600 | 6  | 0.13743200  | 2.61541000  | 3.33297800  |
| 6 | 1.30827700  | -2.27284800 | -2.64001500 | 6  | -1.73627800 | 3.13141300  | 1.90384400  |
| 6 | 1.21202300  | -3.51360000 | -2.06015300 | 1  | -2.42438100 | 1.59063500  | 0.59391400  |
| 6 | -0.18422800 | -4.03200500 | -1.69475200 | 1  | 1.85415600  | -1.68003900 | 3.15116600  |
| 1 | -0.17829800 | -5.12706100 | -1.55625900 | 1  | 1.85218200  | 0.65284900  | 4.04433900  |
| 1 | 0.15522800  | -0.50063200 | -3.18730400 | 6  | -0.80249600 | 3.52223500  | 2.89206100  |
| 1 | 2.09682400  | -4.11585500 | -1.84346600 | 1  | 0.87384700  | 2.90131700  | 4.08920000  |
| 1 | 2.27324700  | -1.84304300 | -2.91198800 | 1  | -2.47083500 | 3.85175400  | 1.53747000  |
| 8 | -0.52007500 | -3.38709300 | -0.49390700 | 1  | -0.82534900 | 4.53700300  | 3.29661700  |
|   |             |             |             | 8  | -0.02988600 | -1.45141000 | -1.25242600 |
|   |             |             |             | 8  | 0.24894200  | -2.64031700 | 1.40727300  |
|   |             |             |             | 50 | 1.03730700  | -3.08295900 | -0.43238100 |

### INT1

|     |                |             |              |
|-----|----------------|-------------|--------------|
| E = | -1940.83469135 | G =         | -1940.370066 |
| 6   | -2.37058800    | 2.42057500  | -3.15017000  |
| 6   | -1.17664800    | 1.69026300  | -3.16250500  |
| 6   | -0.13994400    | 2.02095400  | -2.29291000  |
| 6   | -0.29251000    | 3.09252300  | -1.38527300  |
| 6   | -1.47530400    | 3.84440300  | -1.41331500  |
| 6   | -2.51242200    | 3.50932900  | -2.28660200  |
| 1   | -3.18602800    | 2.14220000  | -3.82180300  |
| 1   | -1.03859900    | 0.85487200  | -3.84997100  |
| 6   | 0.75811200     | 3.33502700  | -0.39241600  |
| 1   | -1.58975300    | 4.68072600  | -0.72016600  |
| 1   | -3.43618700    | 4.09285600  | -2.28554300  |
| 6   | 1.71686900     | 2.42566900  | -0.14597900  |
| 1   | 0.68702100     | 4.23590800  | 0.22096900   |
| 1   | 2.42369700     | 2.57776800  | 0.67252600   |
| 6   | 1.20131500     | 1.31293800  | -2.34083200  |
| 1   | 1.89625400     | 1.98085400  | -2.89012600  |
| 6   | 1.76524300     | 1.13256800  | -0.91723500  |
| 1   | 1.10753500     | 0.40533000  | -0.40946800  |
| 8   | 1.18584600     | 0.10192400  | -3.04817800  |
| 1   | 0.64392800     | -0.52793300 | -2.51520900  |
| 6   | 3.17702800     | 0.48583600  | -1.02450600  |
| 1   | 3.18486200     | -0.01072600 | -2.01489900  |
| 8   | 4.56039300     | -0.34707600 | 0.65993000   |
| 6   | 4.36533400     | 1.37491100  | -0.80457300  |
| 1   | 4.56251400     | 2.30337900  | -1.33511900  |
| 6   | 5.11325800     | 0.86325400  | 0.17787000   |
| 6   | 3.44155100     | -0.61241500 | -0.02445800  |
| 8   | 2.82520800     | -1.64748100 | 0.17786300   |
| 6   | 6.36331500     | 1.27944700  | 0.85476500   |
| 1   | 6.19211700     | 1.41815400  | 1.93487500   |
| 1   | 7.14548200     | 0.51106200  | 0.74171200   |
| 1   | 6.72713700     | 2.22344600  | 0.42810900   |
| 6   | -5.97162700    | -0.84840100 | 1.12227600   |
| 6   | -5.51666800    | -1.15667000 | -0.14143300  |
| 6   | -4.12537600    | -1.20001000 | -0.42951400  |
| 6   | -3.17931400    | -0.89735900 | 0.60663300   |
| 6   | -3.68564900    | -0.60343300 | 1.90519700   |
| 6   | -5.04130000    | -0.57997700 | 2.15584200   |
| 1   | -4.36290200    | -1.77396800 | -2.51152100  |

### INT2

|     |                |             |             |
|-----|----------------|-------------|-------------|
| E = | -327.262288517 | G =         | -327.130251 |
| 6   | 0.23668900     | -1.19673400 | 0.60336000  |
| 6   | -0.97918900    | -1.17405100 | -0.32700400 |
| 6   | -0.97886700    | -1.17429100 | -0.32683300 |
| 6   | 0.23728400     | 1.19677600  | 0.60318300  |
| 1   | -0.65593500    | -1.23764900 | -1.38751600 |
| 1   | -1.64429700    | -2.02883400 | -0.12778600 |
| 1   | -0.12903400    | -1.25802600 | 1.64450800  |
| 1   | 0.85269800     | -2.09135600 | 0.41477400  |
| 1   | -0.65599800    | 1.23812300  | -1.38742400 |
| 1   | -1.64377000    | 2.02913000  | -0.12720400 |
| 1   | 0.85376300     | 2.09095200  | 0.41407000  |
| 1   | -0.12790100    | 1.25853700  | 1.64447800  |
| 8   | -1.74387400    | 0.00017000  | -0.12207100 |
| 7   | 1.06264000     | -0.00023700 | 0.47714700  |
| 6   | 1.97191000     | -0.00023000 | -0.65173700 |
| 1   | 2.62222700     | 0.88807100  | -0.60029800 |
| 1   | 2.62074200     | -0.88962600 | -0.60125000 |
| 1   | 1.49304800     | 0.00066700  | -1.65561900 |

### INT3

|     |                |             |              |
|-----|----------------|-------------|--------------|
| E = | -2268.12227208 | G =         | -2267.499262 |
| 6   | 1.50197300     | -0.08859000 | 4.36494200   |
| 6   | 0.44627600     | -0.11212900 | 3.44577400   |
| 6   | 0.17771000     | 1.00003300  | 2.64953400   |
| 6   | 0.98559200     | 2.15343800  | 2.75402400   |
| 6   | 2.01737900     | 2.17845000  | 3.70254200   |
| 6   | 2.27717300     | 1.06494700  | 4.50390900   |
| 1   | 1.71516600     | -0.97144900 | 4.97222900   |
| 1   | -0.17174400    | -1.00429200 | 3.33748900   |
| 6   | 0.76934000     | 3.25031000  | 1.80973400   |
| 1   | 2.64142000     | 3.07147800  | 3.78274200   |
| 1   | 3.09564200     | 1.09245600  | 5.22741000   |
| 6   | 0.03679200     | 3.07672900  | 0.69676300   |
| 1   | 1.31441800     | 4.18294500  | 1.97092300   |
| 1   | -0.01035700    | 3.86504400  | -0.05608200  |

|    |             |             |             |
|----|-------------|-------------|-------------|
| 6  | -1.00319000 | 1.05223100  | 1.69863500  |
| 1  | -1.80385200 | 1.64090500  | 2.19105900  |
| 6  | -0.64841300 | 1.76885600  | 0.38052800  |
| 1  | 0.09807700  | 1.12930500  | -0.12367200 |
| 8  | -1.54500100 | -0.24037700 | 1.47092500  |
| 1  | -0.89333000 | -0.76580600 | 0.89350300  |
| 6  | -1.82271500 | 1.93124500  | -0.54815100 |
| 1  | -3.00573100 | -0.31715000 | 1.04957200  |
| 8  | -3.41777600 | 1.54099100  | -2.09190900 |
| 6  | -2.56375600 | 3.14540600  | -0.80404400 |
| 1  | -2.38877400 | 4.11710400  | -0.34681600 |
| 6  | -3.51277600 | 2.86783400  | -1.74357700 |
| 6  | -2.39275900 | 0.96880700  | -1.36439100 |
| 8  | -2.26190100 | -0.31764300 | -1.51093000 |
| 6  | -4.53890700 | 3.68074500  | -2.44634600 |
| 1  | -4.36189200 | 3.70612000  | -3.53586400 |
| 1  | -5.55946900 | 3.28625100  | -2.29546700 |
| 1  | -4.51448500 | 4.71447900  | -2.07327400 |
| 6  | 6.29248500  | -2.79552000 | -0.20260300 |
| 6  | 5.23650600  | -3.41575000 | 0.42903500  |
| 6  | 3.91596800  | -2.89861200 | 0.32979100  |
| 6  | 3.68007200  | -1.69943200 | -0.42359200 |
| 6  | 4.79299700  | -1.09730700 | -1.07826700 |
| 6  | 6.06052900  | -1.62931600 | -0.97207400 |
| 1  | 2.99487400  | -4.45708100 | 1.53128900  |
| 1  | 7.30256400  | -3.20417900 | -0.12089300 |
| 1  | 5.39644000  | -4.32555100 | 1.01432800  |
| 6  | 2.81509400  | -3.54944200 | 0.94890800  |
| 6  | 2.35342900  | -1.15207900 | -0.51375700 |
| 1  | 4.62743800  | -0.20315000 | -1.67839000 |
| 1  | 6.89381100  | -1.14799700 | -1.49003400 |
| 6  | 1.29670100  | -1.86894200 | 0.05401600  |
| 6  | 1.54173600  | -3.05895400 | 0.79594000  |
| 1  | 0.67975200  | -3.56166600 | 1.24047300  |
| 6  | 2.12585000  | 0.17271600  | -1.16184800 |
| 6  | 2.75545600  | 1.34780100  | -0.61829100 |
| 6  | 1.31997300  | 0.29676500  | -2.30265800 |
| 6  | 2.61301400  | 2.61228800  | -1.28281200 |
| 6  | 3.51213400  | 1.32050100  | 0.58745800  |
| 6  | 1.16096000  | 1.57250800  | -2.92558700 |
| 6  | 1.79697300  | 2.68692100  | -2.44467100 |
| 6  | 3.26253700  | 3.76034900  | -0.75929600 |
| 6  | 4.12956000  | 2.45357600  | 1.07331500  |
| 1  | 3.58900100  | 0.38760500  | 1.14390800  |
| 1  | 0.52000700  | 1.61507000  | -3.80813900 |
| 1  | 1.67507500  | 3.65225700  | -2.94363100 |
| 6  | 4.01654400  | 3.68865600  | 0.39299600  |
| 1  | 3.14446600  | 4.71037200  | -1.28808400 |
| 1  | 4.69939900  | 2.39611900  | 2.00345900  |
| 1  | 4.51446700  | 4.57862900  | 0.78568600  |
| 8  | 0.01015600  | -1.47369200 | -0.10657300 |
| 8  | 0.69189400  | -0.73890300 | -2.86508500 |
| 50 | -0.85143100 | -1.85310700 | -2.05354300 |
| 6  | -4.24270900 | -1.80543600 | 0.28028300  |
| 6  | -5.56385700 | -2.48669300 | 0.59611500  |
| 6  | -5.61109600 | -1.59917000 | 2.75853300  |
| 6  | -4.29820300 | -0.85720200 | 2.54186400  |
| 1  | -6.41812700 | -1.86720400 | 0.25571300  |
| 1  | -5.61608400 | -3.44477000 | 0.05993500  |
| 1  | -3.40545500 | -2.46501500 | 0.55177100  |
| 1  | -4.12670300 | -1.52846600 | -0.77452800 |
| 1  | -6.47604000 | -0.93946400 | 2.54294900  |
| 1  | -5.68396300 | -1.90215300 | 3.81294700  |
| 1  | -4.26707300 | 0.09214600  | 3.09474000  |
| 1  | -3.44665900 | -1.46942000 | 2.86666000  |
| 8  | -5.67504200 | -2.76919200 | 1.97616200  |
| 7  | -4.06804300 | -0.55807500 | 1.09197800  |

#### INT4

|     |                |             |              |
|-----|----------------|-------------|--------------|
| E = | -1940.82006683 | G =         | -1940.354517 |
| 6   | -0.86643700    | 2.74758300  | -2.81393500  |
| 6   | 0.02642000     | 1.78627700  | -2.32393300  |
| 6   | 1.04759600     | 2.16005700  | -1.45585000  |
| 6   | 1.20291800     | 3.51515300  | -1.06599400  |
| 6   | 0.31762000     | 4.46686500  | -1.58935700  |
| 6   | -0.71288000    | 4.08736400  | -2.45392100  |
| 1   | -1.67544800    | 2.44530900  | -3.48276500  |
| 1   | -0.07472900    | 0.74309700  | -2.62820600  |
| 6   | 2.26840200     | 3.88060300  | -0.11758300  |
| 1   | 0.42872600     | 5.51449700  | -1.29789100  |
| 1   | -1.40145700    | 4.84119500  | -2.84290200  |
| 6   | 2.89808800     | 2.95745200  | 0.63731800   |
| 1   | 2.49613500     | 4.94384700  | -0.00189300  |
| 1   | 3.64338400     | 3.24885300  | 1.38179600   |
| 6   | 2.10811900     | 1.23723700  | -0.94071700  |
| 1   | 3.01430800     | 1.38112500  | -1.56437400  |
| 6   | 2.45864900     | 1.53013700  | 0.50696400   |
| 1   | 1.52334500     | 1.41895800  | 1.08329300   |
| 6   | 3.34120500     | 0.32450400  | 0.86122300   |
| 1   | 3.24858100     | 0.05520900  | 1.92365300   |
| 8   | 3.78529300     | -1.32020800 | -0.83798200  |
| 6   | 4.76000100     | 0.34620600  | 0.37030300   |
| 1   | 5.54435500     | 1.01000500  | 0.72898000   |
| 6   | 4.91976800     | -0.59925500 | -0.56972600  |
| 6   | 2.71174300     | -0.82204200 | -0.01734100  |
| 8   | 2.09541200     | -1.79845500 | 0.62686500   |
| 6   | 6.11488800     | -1.00227200 | -1.35760400  |
| 1   | 6.35111400     | -2.06425500 | -1.17879200  |
| 1   | 5.91893100     | -0.89260200 | -2.43701300  |
| 1   | 6.98605000     | -0.39076900 | -1.08737300  |
| 6   | -1.03160100    | 3.91000900  | 2.00445000   |
| 6   | -0.40740700    | 2.97221900  | 2.79879600   |
| 6   | -0.48741900    | 1.58660000  | 2.49682800   |
| 6   | -1.22889800    | 1.15515300  | 1.34650600   |
| 6   | -1.85515800    | 2.15178500  | 0.54664500   |
| 6   | -1.76052900    | 3.48907300  | 0.86735900   |
| 1   | 0.73756600     | 0.93785800  | 4.16930900   |
| 1   | -0.95844500    | 4.97331500  | 2.24387100   |
| 1   | 0.16836800     | 3.28160300  | 3.67521800   |
| 6   | 0.17414900     | 0.60882500  | 3.29193200   |
| 6   | -1.29433200    | -0.24325900 | 1.02875200   |
| 1   | -2.40292800    | 1.84999200  | -0.34463900  |
| 1   | -2.24134800    | 4.23020000  | 0.22653000   |
| 6   | -0.60051600    | -1.16955800 | 1.81566800   |
| 6   | 0.13140300     | -0.71981300 | 2.95526200   |
| 1   | 0.65307200     | -1.47540900 | 3.54471500   |
| 6   | -2.13507700    | -0.73025600 | -0.10005100  |
| 6   | -3.56530900    | -0.57586700 | -0.07482800  |
| 6   | -1.57708300    | -1.37230300 | -1.19459600  |
| 6   | -4.35658800    | -1.03339900 | -1.18161500  |
| 6   | -4.24037900    | -0.00202200 | 1.03943000   |
| 6   | -2.35157900    | -1.84323100 | -2.28008500  |
| 6   | -3.71412200    | -1.66553500 | -2.27977200  |
| 6   | -5.76824100    | -0.86391900 | -1.14763600  |
| 6   | -5.61164300    | 0.13963800  | 1.04568600   |
| 1   | -3.65557700    | 0.32252200  | 1.89900200   |
| 1   | -1.83453000    | -2.33179900 | -3.10777600  |
| 1   | -4.31846400    | -2.01467900 | -3.12041700  |
| 6   | -6.38632600    | -0.28518000 | -0.06119900  |
| 1   | -6.35572500    | -1.21072700 | -2.00176000  |

|    |             |             |             |   |             |            |             |
|----|-------------|-------------|-------------|---|-------------|------------|-------------|
| 1  | -6.10574300 | 0.58069000  | 1.91458900  | 8 | 0.79783800  | 1.04086000 | -0.72183100 |
| 1  | -7.47178600 | -0.16215100 | -0.04565500 | 6 | 1.91543600  | 2.99870900 | -0.42996000 |
| 8  | -0.60545500 | -2.47796900 | 1.52775000  | 1 | 2.16969300  | 4.04877200 | -0.56213600 |
| 8  | -0.21604800 | -1.63605700 | -1.27461600 | 6 | 0.91180300  | 2.37399700 | -1.06384200 |
| 50 | 0.70865000  | -3.28155900 | 0.14104500  | 6 | 1.78053700  | 0.73569700 | 0.31722900  |
| 8  | 1.78734500  | -0.14889100 | -0.93246500 | 8 | 1.16728600  | 0.36211000 | 1.43901400  |
| 1  | 0.40072700  | -0.85427700 | -1.10245100 | 6 | -0.06761900 | 2.85469400 | -2.07050600 |

**INT5**

E = -806.074452955    G = -805.857419

|   |             |             |             |   |             |             |             |
|---|-------------|-------------|-------------|---|-------------|-------------|-------------|
| 6 | -3.95646000 | 1.15044500  | 0.72652800  | 6 | -3.68494600 | 4.22292500  | -1.24193500 |
| 6 | -2.58156600 | 1.36034200  | 0.55983200  | 6 | -3.05047100 | 4.17157700  | -0.01772600 |
| 6 | -1.76164300 | 0.30400200  | 0.17627400  | 6 | -2.66852300 | 2.93254400  | 0.56055600  |
| 6 | -2.30165700 | -0.98898900 | -0.05248400 | 6 | -2.95267300 | 1.71118600  | -0.13728200 |
| 6 | -3.67613500 | -1.18421100 | 0.14445600  | 6 | -3.60310300 | 1.80039400  | -1.40165700 |
| 6 | -4.49918700 | -0.12147700 | 0.52800700  | 6 | -3.95959300 | 3.02145900  | -1.93785700 |
| 1 | -4.60218100 | 1.98195800  | 1.01862800  | 1 | -1.76664400 | 3.79766000  | 2.33627300  |
| 1 | -2.13855800 | 2.34435100  | 0.72536600  | 1 | -3.97094600 | 5.18348800  | -1.67642900 |
| 6 | -1.41264000 | -2.07362600 | -0.50722000 | 1 | -2.82415400 | 5.09173500  | 0.52775300  |
| 1 | -4.10437800 | -2.17668500 | -0.01977300 | 6 | -1.98665100 | 2.86627100  | 1.80793400  |
| 1 | -5.56986500 | -0.28738200 | 0.66884500  | 6 | -2.54564000 | 0.46108400  | 0.43336100  |
| 6 | -0.20000400 | -1.82050300 | -1.04148000 | 1 | -3.81341300 | 0.88443600  | -1.95444900 |
| 1 | -1.79224300 | -3.09766300 | -0.44831500 | 1 | -4.45407400 | 3.06046800  | -2.91157500 |
| 1 | 0.43347300  | -2.62354300 | -1.42541200 | 6 | -1.86001600 | 0.43845800  | 1.65323100  |
| 6 | -0.27243100 | 0.37923000  | 0.05142000  | 6 | -1.59089600 | 1.66364700  | 2.33317700  |
| 1 | 0.17076500  | -0.08596100 | 0.95216500  | 1 | -1.04817600 | 1.60447600  | 3.27750800  |
| 6 | 0.20592600  | -0.38131800 | -1.17667800 | 6 | -2.83370000 | -0.82716500 | -0.25375100 |
| 1 | -0.34632500 | 0.04434300  | -2.03971600 | 6 | -4.17340700 | -1.32207000 | -0.40069700 |
| 6 | 1.65831200  | 0.11836500  | -1.28445800 | 6 | -1.79817300 | -1.60573600 | -0.74437300 |
| 1 | 1.96417600  | 0.22550900  | -2.33561600 | 6 | -4.40390500 | -2.57507900 | -1.06215800 |
| 8 | 2.46888200  | 0.31248500  | 1.50192000  | 6 | -5.29522000 | -0.61682700 | 0.11853600  |
| 6 | 2.70765600  | -0.71065800 | -0.58878900 | 6 | -2.01232400 | -2.84835700 | -1.38245900 |
| 1 | 3.18992500  | -1.48568000 | -1.18719600 | 6 | -3.29383000 | -3.31974700 | -1.54433100 |
| 6 | 3.10157400  | -0.58683100 | 0.68833100  | 6 | -5.73653800 | -3.05102400 | -1.20426000 |
| 6 | 1.50033800  | 1.56092400  | -0.73107300 | 6 | -6.57423500 | -1.10927700 | -0.03026100 |
| 8 | 2.25203500  | 2.47927000  | -0.86636900 | 1 | -5.12732900 | 0.32302900  | 0.64384700  |
| 6 | 4.18257800  | -1.40005000 | 1.33283100  | 1 | -1.14421200 | -3.40081900 | -1.74604000 |
| 1 | 4.98784900  | -0.74485500 | 1.71288700  | 1 | -3.47216800 | -4.27409000 | -2.04553100 |
| 1 | 3.78533000  | -1.96523800 | 2.19344400  | 6 | -6.80160600 | -2.33424500 | -0.70448300 |
| 1 | 4.63091200  | -2.10727200 | 0.62299400  | 1 | -5.89898800 | -4.00359100 | -1.71528500 |
| 8 | 0.30068200  | 1.67796900  | -0.08733700 | 1 | -7.42033500 | -0.55177100 | -0.37836700 |
| 1 | 3.05036700  | 0.58646000  | 2.22301700  | 1 | -7.82068200 | -2.71104100 | -0.81888600 |

**INT6**

E = -1940.81375958    G = -1940.348623

|   |             |             |             |
|---|-------------|-------------|-------------|
| 6 | 5.99814300  | -2.60280100 | -1.67739300 |
| 6 | 4.87867400  | -1.94745600 | -1.14872200 |
| 6 | 5.02849400  | -0.71392700 | -0.52305400 |
| 6 | 6.30556600  | -0.10331800 | -0.41967700 |
| 6 | 7.41732900  | -0.78610300 | -0.93337800 |
| 6 | 7.26525400  | -2.02633700 | -1.56012200 |
| 1 | 5.87937600  | -3.56756800 | -2.17626800 |
| 1 | 3.88282800  | -2.38880700 | -1.22243400 |
| 6 | 6.42021600  | 1.23118400  | 0.19516100  |
| 1 | 8.40830900  | -0.33131200 | -0.85327400 |
| 1 | 8.14023000  | -2.54212900 | -1.96271800 |
| 6 | 5.34784200  | 2.03433800  | 0.35528300  |
| 1 | 7.42101900  | 1.57855000  | 0.46727000  |
| 1 | 5.45249400  | 3.04717000  | 0.75328700  |
| 6 | 3.92462700  | 0.03578500  | 0.15251200  |
| 1 | 4.04447700  | -0.11030100 | 1.24965500  |
| 6 | 4.01795400  | 1.52952700  | -0.12629700 |
| 1 | 3.98164700  | 1.64752500  | -1.22731900 |
| 8 | 2.59919200  | -0.30918100 | -0.21412600 |
| 1 | -0.28310100 | -0.27369800 | -0.77041700 |
| 6 | 2.66592700  | 2.02214600  | 0.42613500  |
| 1 | 2.74108600  | 2.30770400  | 1.48652400  |

**INT7**

E = -806.076338193    G = -805.859571

|   |             |             |             |
|---|-------------|-------------|-------------|
| 6 | 3.91573100  | 1.15220000  | 0.99194900  |
| 6 | 2.65536400  | 1.40865200  | 0.43776900  |
| 6 | 1.93188600  | 0.37213700  | -0.14318200 |
| 6 | 2.45133900  | -0.94849300 | -0.17837400 |
| 6 | 3.72594300  | -1.17891800 | 0.35935300  |
| 6 | 4.45203700  | -0.13716100 | 0.94317700  |
| 1 | 4.48170400  | 1.96368200  | 1.45541700  |
| 1 | 2.22726800  | 2.41284800  | 0.45337100  |
| 6 | 1.63246800  | -2.03448100 | -0.74668300 |
| 1 | 4.14319400  | -2.18910000 | 0.33229500  |
| 1 | 5.44026400  | -0.33446800 | 1.36531400  |
| 6 | 0.30051200  | -1.90225200 | -0.92048400 |
| 1 | 2.13157600  | -2.98274000 | -0.96563300 |
| 1 | -0.31613100 | -2.73455000 | -1.26941500 |
| 6 | 0.61992100  | 0.53310900  | -0.84389600 |
| 1 | 0.81835000  | 0.50582200  | -1.93696600 |
| 6 | -0.32501800 | -0.60493300 | -0.50271800 |
| 1 | -0.43621200 | -0.61706600 | 0.59846700  |
| 8 | -0.12459300 | 1.71901000  | -0.56624800 |

|   |             |             |             |   |             |             |             |
|---|-------------|-------------|-------------|---|-------------|-------------|-------------|
| 1 | -3.02542600 | 0.40050100  | 2.37352900  | 6 | -1.21216400 | -2.73770100 | -3.46827300 |
| 6 | -1.63980200 | -0.05080500 | -1.06569400 | 1 | -2.11459100 | -1.66485300 | -1.83366500 |
| 1 | -1.61108600 | -0.11958300 | -2.16864700 | 6 | -0.05918700 | -3.41377900 | -3.89439400 |
| 8 | -2.51966100 | 0.10462900  | 1.60603300  | 1 | -0.03872500 | -3.84730500 | -4.89798800 |
| 6 | -2.92675400 | -0.63526900 | -0.56707900 | 6 | -4.40867600 | -1.26652800 | 3.58760700  |
| 1 | -3.56767200 | -1.16848300 | -1.26917700 | 1 | -5.38368100 | -1.73130000 | 3.79355500  |
| 6 | -3.34018800 | -0.51533600 | 0.70495400  | 1 | -3.85377600 | -1.24942400 | 4.53914900  |
| 6 | -1.45738800 | 1.45711700  | -0.74127100 | 1 | -4.57452800 | -0.21924500 | 3.29409300  |
| 8 | -2.29192300 | 2.30649100  | -0.66039300 | 6 | -3.49881500 | -5.56794600 | 1.09241400  |
| 6 | -4.63871600 | -1.03183500 | 1.24277600  | 1 | -2.96608500 | -6.21530200 | 1.80993700  |
| 1 | -4.46734700 | -1.74851200 | 2.06476900  | 1 | -4.57354000 | -5.77544900 | 1.20643500  |
| 1 | -5.24709400 | -0.20271200 | 1.64806900  | 1 | -3.19245100 | -5.87893000 | 0.08256000  |
| 1 | -5.22597600 | -1.52907400 | 0.45989600  | 6 | 2.32306900  | -4.19612900 | -3.59882800 |

**INT8**

E = -5944.83525721 G = -5943.309167

|    |             |             |             |   |             |             |             |
|----|-------------|-------------|-------------|---|-------------|-------------|-------------|
| 6  | 1.59028900  | -3.42939800 | 1.39073600  | 6 | -2.41111100 | -2.62472800 | -4.37616300 |
| 6  | 4.18558100  | -1.31904300 | 0.16753500  | 1 | -2.11366600 | -2.65108300 | -5.43476500 |
| 6  | 3.49098400  | -0.16809400 | 0.70307900  | 1 | -3.11398500 | -3.45980700 | -4.21462500 |
| 6  | 3.86453900  | -0.05982800 | 2.08572100  | 1 | -2.96636300 | -1.69214700 | -4.19819500 |
| 6  | 4.73695100  | -1.12816400 | 2.41407100  | 6 | 3.87052000  | 3.83270100  | -4.23082100 |
| 6  | 4.93003300  | -1.90366300 | 1.24131900  | 1 | 3.97587200  | 3.79362200  | -5.32473900 |
| 15 | 2.28844300  | 1.07567700  | 0.05972100  | 1 | 3.29083700  | 4.73716300  | -3.97919300 |
| 15 | -0.23109300 | -1.42105700 | 0.27146300  | 1 | 4.87279000  | 3.96263300  | -3.79344900 |
| 6  | 2.49832400  | 1.25778900  | -1.77331700 | 6 | 1.18069500  | -0.38911200 | -4.95893400 |
| 6  | 3.10675200  | 2.62055100  | 0.64492800  | 1 | 1.73649700  | -1.33822800 | -5.03276400 |
| 6  | 2.32133600  | 3.75964700  | 0.83296600  | 1 | 0.17618500  | -0.64923200 | -4.59483200 |
| 6  | 2.90756200  | 4.98243900  | 1.19635500  | 1 | 1.09030600  | 0.02408600  | -5.97406200 |
| 6  | 4.29348500  | 5.03763500  | 1.37157400  | 6 | 6.59674200  | 3.98985100  | 1.39363100  |
| 6  | 5.10598100  | 3.90641000  | 1.18276900  | 1 | 7.10867100  | 3.09563400  | 1.00918700  |
| 6  | 4.49929300  | 2.70299400  | 0.81144200  | 1 | 7.02612000  | 4.87260300  | 0.89403600  |
| 6  | 1.84138600  | 0.37739800  | -2.64372600 | 1 | 6.83924400  | 4.07677400  | 2.46642600  |
| 6  | 1.87002100  | 0.57588800  | -4.03007200 | 6 | 2.03825900  | 6.20125200  | 1.37820400  |
| 6  | 2.54133900  | 1.69641900  | -4.53639200 | 1 | 2.57930100  | 7.02062300  | 1.87351400  |
| 6  | 3.19059400  | 2.60123600  | -3.69018400 | 1 | 1.68122400  | 6.57487200  | 0.40350100  |
| 6  | 3.17066000  | 2.36361500  | -2.30917200 | 1 | 1.14480400  | 5.96339400  | 1.97686000  |
| 26 | 2.90874600  | -1.83925400 | 1.74963800  | 1 | 3.52201800  | 0.70717400  | 2.76778200  |
| 6  | 0.90514100  | -2.17500000 | 1.47434900  | 6 | 0.55830400  | -0.32879500 | 3.32974500  |
| 6  | 2.28971900  | -3.64052200 | 2.60766100  | 1 | 0.27384700  | 0.25734300  | 2.42503900  |
| 6  | 1.16209700  | -1.61253900 | 2.79001800  | 6 | 4.38761900  | -1.68321500 | -1.29061900 |
| 6  | 2.02239400  | -2.53739600 | 3.46592900  | 1 | 3.40099700  | -1.69875000 | -1.78203700 |
| 1  | 1.23881600  | 3.68032600  | 0.73713800  | 7 | 5.10842300  | -0.59947300 | -1.94355100 |
| 1  | 5.12389000  | 1.82570300  | 0.64449100  | 6 | 4.98766100  | -3.08960100 | -1.44554000 |
| 1  | 1.28168300  | -0.46392800 | -2.24356100 | 6 | 4.37325800  | -4.19954200 | -0.84289400 |
| 1  | 3.67099600  | 3.07176600  | -1.65055700 | 6 | 6.14307200  | -3.31630800 | -2.20379000 |
| 1  | 5.15382800  | -1.32729000 | 3.39926100  | 6 | 4.88111700  | -5.48870700 | -1.00303300 |
| 1  | 5.54586500  | -2.79478700 | 1.15572300  | 1 | 3.50045000  | -4.04365900 | -0.21364300 |
| 1  | 2.93749600  | -4.48530700 | 2.83398600  | 6 | 6.65576900  | -4.60751600 | -2.37212500 |
| 1  | 2.44583500  | -2.40755100 | 4.45620400  | 1 | 6.65823500  | -2.47999200 | -2.66985200 |
| 1  | 1.56683600  | -4.11053800 | 0.54651700  | 6 | 6.02584300  | -5.70116000 | -1.77740800 |
| 1  | 4.75955600  | 5.98406800  | 1.66271200  | 1 | 4.38292900  | -6.33174700 | -0.51739900 |
| 1  | 2.55133300  | 1.87098700  | -5.61614200 | 1 | 7.55812500  | -4.75385100 | -2.97045900 |
| 45 | -0.12141600 | 0.84002500  | 0.41382900  | 1 | 6.42695400  | -6.70879900 | -1.90735500 |
| 6  | -1.81135200 | -2.13967900 | 0.93221400  | 6 | 5.04734800  | -0.51917700 | -3.38257700 |
| 6  | -2.58210600 | -1.41337100 | 1.84451300  | 1 | 5.86257700  | -1.05861800 | -3.90931100 |
| 6  | -2.12332500 | -3.48557700 | 0.68256900  | 1 | 4.09425800  | -0.93075900 | -3.73947700 |
| 6  | -3.63641800 | -2.02640800 | 2.54010500  | 1 | 5.09200400  | 0.53492600  | -3.70107100 |
| 1  | -2.34469700 | -0.36854600 | 2.03133800  | 6 | 6.31724000  | -0.06772500 | -1.36212400 |
| 6  | -3.18393700 | -4.11495700 | 1.34371100  | 1 | 6.44277100  | 0.98225800  | -1.68003700 |
| 1  | -1.52640300 | -4.05953200 | -0.02924900 | 1 | 6.25819500  | -0.07787600 | -0.26587300 |
| 6  | -3.92136700 | -3.37075700 | 2.27766000  | 1 | 7.24421400  | -0.60970400 | -1.64878900 |
| 1  | -4.74355100 | -3.85564700 | 2.81247600  | 7 | -0.71504400 | -0.56193800 | 4.02114800  |
| 6  | -0.10238600 | -2.29419000 | -1.33844100 | 6 | 1.49651600  | 0.59851100  | 4.09509800  |
| 6  | 1.04213400  | -2.94845200 | -1.80341500 | 6 | 1.60528700  | 1.93212500  | 3.67274800  |
| 6  | -1.22000100 | -2.18069100 | -2.18583400 | 6 | 2.22072100  | 0.19705100  | 5.22858400  |
| 6  | 1.07795400  | -3.51978300 | -3.08798400 | 6 | 2.47194500  | 2.82041300  | 4.31328300  |
| 1  | 1.92556100  | -3.00278700 | -1.17510500 | 1 | 1.01714100  | 2.27756100  | 2.82128400  |



|   |             |             |             |
|---|-------------|-------------|-------------|
| 1 | -0.41963400 | -0.64071500 | 0.62497300  |
| 8 | -0.17763200 | 1.66924200  | -0.62750800 |
| 1 | -3.78818300 | -0.27755400 | -1.12461800 |
| 6 | -1.63434000 | -0.15193700 | -1.05322300 |
| 1 | -1.61096600 | -0.26823700 | -2.15348100 |
| 8 | -2.37916000 | -0.05637200 | 1.69883800  |
| 6 | -2.95714500 | -0.70406500 | -0.53956800 |
| 1 | -3.00979600 | -1.79633700 | -0.69944900 |
| 6 | -3.23822800 | -0.43942100 | 0.93550500  |
| 6 | -1.49476300 | 1.35890300  | -0.78403300 |
| 8 | -2.37247000 | 2.16963700  | -0.72255100 |
| 6 | -4.66350600 | -0.66978600 | 1.38678600  |
| 1 | -5.08142200 | -1.59506700 | 0.95983200  |
| 1 | -4.70990900 | -0.69504000 | 2.48306400  |
| 1 | -5.28296400 | 0.16724300  | 1.02149000  |

**(R,R,R)-7**

|     |                |             |             |
|-----|----------------|-------------|-------------|
| E = | -806.081788339 | G =         | -805.864416 |
| 6   | -3.90703800    | -1.64971500 | -0.23707600 |
| 6   | -2.50771600    | -1.62042400 | -0.19551000 |
| 6   | -1.82847800    | -0.40404200 | -0.16012200 |
| 6   | -2.55508000    | 0.80974000  | -0.17363100 |
| 6   | -3.95538200    | 0.76772000  | -0.23718700 |
| 6   | -4.63020100    | -0.45517700 | -0.26430700 |
| 1   | -4.43064100    | -2.60849700 | -0.25731000 |
| 1   | -1.92957100    | -2.54617700 | -0.19962200 |
| 6   | -1.81618100    | 2.07382400  | -0.09797700 |
| 1   | -4.51745600    | 1.70534500  | -0.25380200 |
| 1   | -5.72174900    | -0.47473000 | -0.30641700 |
| 6   | -0.52466500    | 2.10776800  | 0.27393100  |
| 1   | -2.36013200    | 3.00036700  | -0.30216200 |
| 1   | -0.00108700    | 3.06231700  | 0.38139000  |
| 6   | -0.31281200    | -0.33172400 | -0.20618600 |
| 1   | -0.02736400    | -0.13376000 | -1.25616000 |
| 6   | 0.21022200     | 0.84041100  | 0.63591700  |
| 1   | -0.00639900    | 0.61551000  | 1.70175000  |
| 6   | 1.74192600     | 0.97681200  | 0.54035200  |
| 1   | 2.02421500     | 1.87981200  | 1.11436200  |
| 8   | 3.38695900     | -0.69416500 | 0.32751400  |
| 6   | 2.36222500     | 0.97580100  | -0.82674100 |
| 2   | 2.11225300     | 1.64894900  | -1.64417600 |
| 6   | 3.28118700     | 0.00184400  | -0.87306900 |
| 6   | 2.45928500     | -0.20011600 | 1.20849800  |
| 8   | 2.30247500     | -0.65015600 | 2.30631000  |
| 6   | 4.18925300     | -0.47175400 | -1.94574100 |
| 1   | 5.24098700     | -0.40495000 | -1.62248100 |
| 1   | 3.98566300     | -1.53024100 | -2.17670100 |
| 1   | 4.05496600     | 0.12627500  | -2.85690200 |
| 8   | 0.32695700     | -1.54840500 | 0.11283800  |
| 1   | 0.20591800     | -1.72422700 | 1.05803900  |

**(S,R,R)-4a**

|     |                |             |             |
|-----|----------------|-------------|-------------|
| E = | -806.095225244 | G =         | -805.878863 |
| 6   | -4.33737500    | 0.59106500  | 0.26234200  |
| 6   | -3.03275200    | 1.09649700  | 0.32491100  |
| 6   | -1.95068700    | 0.23146100  | 0.19822500  |
| 6   | -2.14818800    | -1.16029300 | 0.00421800  |
| 6   | -3.46217100    | -1.64930400 | -0.02977200 |
| 6   | -4.54914300    | -0.77982300 | 0.09496700  |
| 1   | -5.18846200    | 1.27002400  | 0.35179200  |
| 1   | -2.84942600    | 2.16275000  | 0.47088400  |
| 6   | -0.98064400    | -2.03831900 | -0.18662400 |
| 1   | -3.63075500    | -2.72003700 | -0.17155900 |
| 1   | -5.56697600    | -1.17489200 | 0.05747700  |
| 6   | 0.23467400     | -1.55218800 | -0.51587100 |
| 1   | -1.14533500    | -3.11767600 | -0.12451400 |
| 1   | 1.07430500     | -2.20819500 | -0.74979800 |

|   |             |             |             |
|---|-------------|-------------|-------------|
| 6 | -0.51647300 | 0.63224500  | 0.33817300  |
| 1 | -0.18563800 | 0.32104500  | 1.35134000  |
| 6 | 0.35688200  | -0.06494400 | -0.69492400 |
| 1 | -0.07666100 | 0.18138900  | -1.68556500 |
| 6 | 1.64859700  | 0.75108000  | -0.57744400 |
| 1 | 2.19406500  | 0.81605400  | -1.52790400 |
| 8 | 3.43841800  | -1.35124400 | -1.01750400 |
| 6 | 2.63727800  | 0.31315000  | 0.50541300  |
| 1 | 3.32847700  | 1.14548500  | 0.72950500  |
| 6 | 3.48821800  | -0.88255200 | 0.09837400  |
| 6 | 1.07920100  | 2.14289700  | -0.23951800 |
| 8 | 1.64051600  | 3.19676000  | -0.30384000 |
| 6 | 4.39326900  | -1.44958300 | 1.17061500  |
| 1 | 5.07659000  | -2.18775000 | 0.73184400  |
| 1 | 4.96257500  | -0.65207600 | 1.67364900  |
| 1 | 3.77609900  | -1.94027100 | 1.94246800  |
| 8 | -0.21252300 | 2.02087300  | 0.19259300  |
| 1 | 2.13573300  | 0.08471700  | 1.46188600  |

**(S,R,R)-6**

|     |                |             |             |
|-----|----------------|-------------|-------------|
| E = | -806.081101518 | G =         | -805.864167 |
| 6   | 4.58360800     | 0.49823400  | -0.29574600 |
| 6   | 3.32171900     | 1.07631200  | -0.47960900 |
| 6   | 2.16267000     | 0.33108400  | -0.26458600 |
| 6   | 2.26097300     | -1.02264100 | 0.13369000  |
| 6   | 3.53067200     | -1.59555900 | 0.29658600  |
| 6   | 4.68710900     | -0.84036100 | 0.08769600  |
| 1   | 5.48445300     | 1.09371800  | -0.46178600 |
| 1   | 3.22909400     | 2.11463600  | -0.80333900 |
| 6   | 1.03148900     | -1.78077200 | 0.38389600  |
| 1   | 3.60707300     | -2.64278800 | 0.60094700  |
| 1   | 5.66949100     | -1.29847200 | 0.22442700  |
| 6   | -0.15660000    | -1.16716100 | 0.51064000  |
| 1   | 1.11462300     | -2.86339700 | 0.51351200  |
| 1   | -1.05460300    | -1.74448300 | 0.74695400  |
| 6   | 0.78610100     | 0.91510400  | -0.53572600 |
| 1   | 0.50785900     | 0.63288800  | -1.56861600 |
| 6   | -0.27327800    | 0.33342400  | 0.41373500  |
| 1   | -0.07809400    | 0.75346200  | 1.42308400  |
| 8   | 0.77167900     | 2.32863600  | -0.53002000 |
| 1   | 1.07240000     | 2.62089700  | 0.34307900  |
| 6   | -1.68492800    | 0.81178000  | 0.02122400  |
| 1   | -1.62171700    | 1.90823600  | -0.09313900 |
| 8   | -3.73481400    | -0.20588800 | 0.57680500  |
| 6   | -2.32400600    | 0.15644100  | -1.16913800 |
| 1   | -1.92829100    | 0.13905100  | -2.18227000 |
| 6   | -3.48150700    | -0.39466300 | -0.78139500 |
| 6   | -2.69482100    | 0.50930400  | 1.12741900  |
| 8   | -2.64969000    | 0.78623000  | 2.28903300  |
| 6   | -4.52914500    | -1.15268800 | -1.50861200 |
| 1   | -4.66244100    | -2.15227200 | -1.06320000 |
| 1   | -5.49989200    | -0.63476600 | -1.43998400 |
| 1   | -4.25768000    | -1.26557000 | -2.56665800 |

**TS1a**

|     |                |            |              |
|-----|----------------|------------|--------------|
| E = | -1940.81296969 | G =        | -1940.351203 |
| 6   | -1.39386100    | 2.09039300 | -3.04330100  |
| 6   | -0.28278900    | 1.39836800 | -2.54580600  |
| 6   | 0.57569400     | 2.01353000 | -1.63979000  |
| 6   | 0.34500700     | 3.34965900 | -1.22562300  |
| 6   | -0.74268000    | 4.04316900 | -1.77163400  |
| 6   | -1.61368600    | 3.41673900 | -2.66673500  |
| 1   | -2.07828900    | 1.58996400 | -3.73167000  |
| 1   | -0.09020600    | 0.37536000 | -2.86922700  |
| 6   | 1.21801400     | 3.95434800 | -0.20846600  |
| 1   | -0.92455700    | 5.07538600 | -1.46223400  |
| 1   | -2.47067400    | 3.96438200 | -3.06573400  |

|    |             |             |             |    |             |             |             |
|----|-------------|-------------|-------------|----|-------------|-------------|-------------|
| 6  | 2.03865400  | 3.21090600  | 0.55930600  | 6  | 4.31591800  | 2.77773900  | -1.66370600 |
| 1  | 1.12560600  | 5.03054900  | -0.04022700 | 1  | 3.38567900  | 5.34859200  | -1.87320800 |
| 1  | 2.61815200  | 3.66287400  | 1.36822900  | 1  | 1.10599600  | 6.15715000  | -1.28874200 |
| 6  | 1.83966800  | 1.40175900  | -1.10815400 | 6  | 4.72926100  | 1.58245100  | -1.19545900 |
| 1  | 2.68327300  | 1.83461900  | -1.67993900 | 1  | 5.00250400  | 3.42665000  | -2.21460800 |
| 6  | 2.04457600  | 1.72400800  | 0.36197800  | 1  | 5.75409900  | 1.23455800  | -1.34811800 |
| 1  | 1.18237700  | 1.30784700  | 0.91255100  | 6  | 2.37316600  | 0.94395000  | -0.93813600 |
| 6  | 3.25408700  | 0.86207200  | 0.73618200  | 1  | 2.36675500  | 0.57130600  | -1.98275500 |
| 1  | 3.29666600  | 0.69741600  | 1.82439600  | 6  | 3.76648500  | 0.77743500  | -0.36635700 |
| 8  | 4.15634800  | -0.84384500 | -0.66450000 | 1  | 3.73636300  | 1.21924800  | 0.64848500  |
| 6  | 4.58130800  | 1.24211700  | 0.13985900  | 8  | 1.57205900  | 0.06760600  | -0.15063800 |
| 1  | 5.11060800  | 2.17717900  | 0.31216500  | 1  | 0.62967500  | -0.18166500 | -0.73717200 |
| 6  | 5.01760600  | 0.23885000  | -0.63604800 | 6  | 3.92515300  | -0.74807300 | -0.18582700 |
| 6  | 2.99991400  | -0.50582600 | 0.04045500  | 1  | 4.44946600  | -1.20199600 | -1.04057700 |
| 8  | 2.43612400  | -1.46633200 | 0.67349000  | 8  | 2.28466800  | -1.83432000 | 1.16071000  |
| 6  | 6.25056300  | 0.07188900  | -1.44613900 | 6  | 4.45037400  | -1.14387900 | 1.16638900  |
| 1  | 6.80993900  | -0.81878300 | -1.11579600 | 1  | 5.45291100  | -0.93950900 | 1.53739200  |
| 1  | 5.99501600  | -0.08077800 | -2.50761800 | 6  | 3.45591400  | -1.68866200 | 1.88196500  |
| 1  | 6.89722500  | 0.95467700  | -1.35584800 | 6  | 2.48480000  | -1.34758600 | -0.12254600 |
| 6  | -1.65485200 | 3.75826900  | 2.23010600  | 8  | 2.05425300  | -2.09811000 | -1.07359900 |
| 6  | -0.88274400 | 2.92531200  | 3.01144500  | 6  | 3.37818400  | -2.16484600 | 3.28510000  |
| 6  | -0.70204300 | 1.55898200  | 2.66952900  | 1  | 2.61782500  | -1.58850600 | 3.83586200  |
| 6  | -1.33194100 | 1.03180600  | 1.49121600  | 1  | 3.07083800  | -3.22282000 | 3.31714400  |
| 6  | -2.09498500 | 1.92964300  | 0.69290700  | 1  | 4.34919400  | -2.05631200 | 3.78594900  |
| 6  | -2.25881100 | 3.24917400  | 1.05695800  | 6  | -1.14129900 | 2.58490100  | 3.95900700  |
| 1  | 0.59318100  | 1.09824300  | 4.35151300  | 6  | -0.68950100 | 1.30617400  | 4.21053300  |
| 1  | -1.79078500 | 4.80665800  | 2.50581800  | 6  | -0.80307000 | 0.28112500  | 3.23486100  |
| 1  | -0.39385400 | 3.30451000  | 3.91303700  | 6  | -1.40914600 | 0.57215600  | 1.96806300  |
| 6  | 0.10688800  | 0.69518300  | 3.45893900  | 6  | -1.86676600 | 1.90286900  | 1.74433400  |
| 6  | -1.16410700 | -0.35529000 | 1.15112100  | 6  | -1.73203900 | 2.88127800  | 2.70814100  |
| 1  | -2.54182700 | 1.56971600  | -0.23237000 | 1  | 0.10846100  | -1.27004900 | 4.45167700  |
| 1  | -2.84889800 | 3.91052000  | 0.41946400  | 1  | -1.04276900 | 3.36583200  | 4.71654800  |
| 6  | -0.35798100 | -1.16921800 | 1.95588000  | 1  | -0.22714700 | 1.06116400  | 5.17086100  |
| 6  | 0.28213800  | -0.61869800 | 3.10703400  | 6  | -0.32337900 | -1.03670700 | 3.47429100  |
| 1  | 0.90546500  | -1.29105700 | 3.69901500  | 6  | -1.51505900 | -0.45722900 | 0.97024100  |
| 6  | -1.87389400 | -0.93604000 | -0.02355500 | 1  | -2.32801100 | 2.15039500  | 0.78831100  |
| 6  | -3.31130400 | -0.94707100 | -0.08311200 | 1  | -2.08545100 | 3.89470700  | 2.50207000  |
| 6  | -1.16980800 | -1.47808000 | -1.09400000 | 6  | -0.94464500 | -1.71351800 | 1.21385900  |
| 6  | -3.97856400 | -1.42042700 | -1.26246400 | 6  | -0.38126100 | -1.99342400 | 2.49577300  |
| 6  | -4.11562800 | -0.51916000 | 1.01137900  | 1  | 0.01396000  | -2.99792200 | 2.65242000  |
| 6  | -1.83235700 | -1.96427800 | -2.25063000 | 6  | -2.22992500 | -0.17833800 | -0.30604200 |
| 6  | -3.20199300 | -1.91682200 | -2.34369600 | 6  | -3.63317500 | 0.13375800  | -0.31730200 |
| 6  | -5.39943000 | -1.40407900 | -1.31673000 | 6  | -1.54916800 | -0.20201000 | -1.51825200 |
| 6  | -5.49197300 | -0.52629900 | 0.93242400  | 6  | -4.27994500 | 0.47533700  | -1.55253800 |
| 1  | -3.62569200 | -0.18820600 | 1.92618000  | 6  | -4.42596500 | 0.09430400  | 0.86465100  |
| 1  | -1.21666100 | -2.36352700 | -3.05913400 | 6  | -2.19104700 | 0.12936100  | -2.74023500 |
| 1  | -3.71037400 | -2.27731300 | -3.24150300 | 6  | -3.52112000 | 0.47301600  | -2.75461900 |
| 6  | -6.14524200 | -0.96154700 | -0.24634600 | 6  | -5.66561000 | 0.79385100  | -1.55000600 |
| 1  | -5.89017900 | -1.76029300 | -2.22643600 | 6  | -5.77018500 | 0.39983200  | 0.83217000  |
| 1  | -6.08439500 | -0.19655000 | 1.78926400  | 1  | -3.95372600 | -0.18948900 | 1.80468800  |
| 1  | -7.23653800 | -0.95632100 | -0.29875100 | 1  | -1.59145700 | 0.11313500  | -3.65244900 |
| 8  | -0.16814400 | -2.46826100 | 1.69129200  | 1  | -4.01393300 | 0.73995900  | -3.69289900 |
| 8  | 0.19674500  | -1.59493000 | -1.07373200 | 6  | -6.39890300 | 0.76291200  | -0.38381500 |
| 50 | 1.13353100  | -3.12633800 | 0.22863700  | 1  | -6.14119200 | 1.05885600  | -2.49811800 |
| 8  | 1.96686800  | -0.01378100 | -1.20056500 | 1  | -6.35681200 | 0.35798100  | 1.75308300  |
| 1  | 0.98468900  | -0.67302700 | -1.14180500 | 1  | -7.46359600 | 1.00780800  | -0.39515800 |
|    |             |             |             | 8  | -0.92141100 | -2.69230200 | 0.30163700  |
|    |             |             |             | 8  | -0.23763400 | -0.58900300 | -1.58147800 |
|    |             |             |             | 50 | 0.03089600  | -2.78901200 | -1.53861500 |

**TS1b**

|     |                |            |              |
|-----|----------------|------------|--------------|
| E = | -1940.80606878 | G =        | -1940.343848 |
| 6   | 0.3834000      | 4.19882100 | -0.72609400  |
| 6   | 0.68860000     | 2.83719900 | -0.61526600  |
| 6   | 1.96185700     | 2.38539300 | -0.94569000  |
| 6   | 2.96131300     | 3.28716200 | -1.39034600  |
| 6   | 2.62788100     | 4.64266500 | -1.52313900  |
| 6   | 1.34786900     | 5.09625200 | -1.19072800  |
| 1   | -0.61217500    | 4.55225100 | -0.44884300  |
| 1   | -0.06152700    | 2.13430100 | -0.25382200  |

**TS2a'**

|     |                |            |              |
|-----|----------------|------------|--------------|
| E = | -1940.79696341 | G =        | -1940.337234 |
| 6   | -7.66028100    | 0.45546300 | -1.08321100  |
| 6   | -6.26392600    | 0.35172500 | -1.12174600  |
| 6   | -5.54358500    | 0.28092100 | 0.06601700   |
| 6   | -6.20522300    | 0.31106200 | 1.32164300   |
| 6   | -7.60129500    | 0.44087600 | 1.33874400   |

|    |             |             |             |    |             |             |             |
|----|-------------|-------------|-------------|----|-------------|-------------|-------------|
| 6  | -8.32471400 | 0.50885800  | 0.14465300  | 6  | -4.20340500 | 0.41827200  | -0.70094200 |
| 1  | -8.22810100 | 0.50145100  | -2.01544100 | 6  | -5.34252300 | 0.90105500  | -0.00401400 |
| 1  | -5.72693400 | 0.32430700  | -2.07182200 | 6  | -6.31000700 | 1.62144600  | -0.71888400 |
| 6  | -5.41418900 | 0.18476500  | 2.55922400  | 6  | -6.17429000 | 1.82803100  | -2.09450400 |
| 1  | -8.12412100 | 0.47409600  | 2.29831600  | 1  | -4.96682000 | 1.46360300  | -3.85132100 |
| 1  | -9.41295300 | 0.60096900  | 0.17388000  | 1  | -3.20071600 | 0.22233200  | -2.58809500 |
| 6  | -4.15467600 | -0.29977500 | 2.55166200  | 6  | -5.49217900 | 0.60601800  | 1.43232400  |
| 1  | -5.90431000 | 0.44435700  | 3.50185600  | 1  | -7.18564300 | 2.00843200  | -0.19103300 |
| 1  | -3.59718600 | -0.44755100 | 3.47997100  | 1  | -6.94048500 | 2.38514000  | -2.63867600 |
| 6  | -4.05087800 | 0.25518100  | 0.15752700  | 6  | -4.78663700 | -0.37434100 | 2.03234400  |
| 1  | -3.72522500 | 1.27498400  | 0.45138100  | 1  | -6.24528200 | 1.17043700  | 1.98922100  |
| 6  | -3.58948000 | -0.72798700 | 1.22788800  | 1  | -4.94651300 | -0.62879300 | 3.08261900  |
| 1  | -4.05122100 | -1.70064900 | 0.96499600  | 6  | -3.17967500 | -0.22252400 | 0.18104700  |
| 6  | -2.08924600 | -0.85556600 | 0.91636600  | 1  | -2.64614600 | 0.57907000  | 0.72732100  |
| 1  | -1.76650100 | -1.90374900 | 0.99378900  | 6  | -3.83652800 | -1.16623000 | 1.18057900  |
| 8  | -1.38600300 | 1.07988900  | -0.42838400 | 1  | -4.43089500 | -1.88829500 | 0.58485200  |
| 6  | -1.12061200 | 0.08640200  | 1.60245600  | 6  | -2.60925200 | -1.91799000 | 1.73957200  |
| 1  | -1.08128400 | 0.18657000  | 2.69033200  | 1  | -2.82440900 | -2.98366400 | 1.91114200  |
| 6  | -0.98373400 | 1.22099400  | 0.78500100  | 8  | -0.47257100 | -0.63600400 | 1.31553400  |
| 6  | -2.05158800 | -0.41969900 | -0.60171000 | 6  | -1.95235600 | -1.27404200 | 2.92580900  |
| 8  | -1.35315800 | -1.06039600 | -1.47412900 | 1  | -2.37703400 | -1.32365200 | 3.92735700  |
| 6  | -0.41676100 | 2.53593600  | 1.19176900  | 6  | -0.82334200 | -0.61205400 | 2.62510300  |
| 1  | 0.03828200  | 3.04681200  | 0.33637000  | 6  | -1.63970400 | -1.81053500 | 0.51968900  |
| 1  | -1.24475900 | 3.15911000  | 1.57117800  | 8  | -0.91090500 | -2.78281400 | 0.13423100  |
| 1  | 0.32355000  | 2.42074500  | 1.99294600  | 6  | 0.09077600  | 0.14922800  | 3.52677500  |
| 6  | 2.63683800  | 4.79201200  | 0.17862600  | 1  | 1.10202800  | -0.29157500 | 3.50471700  |
| 6  | 2.09574400  | 4.34613000  | -1.00949000 | 1  | 0.18804000  | 1.18935200  | 3.17593200  |
| 6  | 2.00790500  | 2.95913800  | -1.30363800 | 1  | -0.27528200 | 0.14340800  | 4.56239400  |
| 6  | 2.50409300  | 2.00184200  | -0.35535300 | 6  | 0.02779200  | 4.42019800  | 1.30648000  |
| 6  | 3.05180100  | 2.49846500  | 0.86305000  | 6  | -0.65172500 | 3.84550500  | 0.25236000  |
| 6  | 3.11449300  | 3.85218500  | 1.12329800  | 6  | -0.17685100 | 2.65994700  | -0.36775500 |
| 1  | 1.01370100  | 3.21734600  | -3.21752200 | 6  | 1.03610400  | 2.05350600  | 0.09926100  |
| 1  | 2.69475600  | 5.86155600  | 0.39331200  | 6  | 1.71151900  | 2.67284800  | 1.18917300  |
| 1  | 1.71347400  | 5.05831400  | -1.74587800 | 6  | 1.21979400  | 3.82065100  | 1.77829200  |
| 6  | 1.40131700  | 2.48850700  | -2.50096400 | 1  | -1.79306000 | 2.51511700  | -1.81446000 |
| 6  | 2.40381900  | 0.59919100  | -0.64092400 | 1  | -0.35096700 | 5.32958600  | 1.77875000  |
| 1  | 3.41836800  | 1.78959900  | 1.60543700  | 1  | -1.57808000 | 4.29153100  | -0.11989500 |
| 1  | 3.53595300  | 4.20158400  | 2.06920200  | 6  | -0.88262600 | 2.04254100  | -1.43759900 |
| 6  | 1.78376000  | 0.17917400  | -1.82403800 | 6  | 1.50081000  | 0.83428100  | -0.49850600 |
| 1  | 1.27983000  | 1.14557300  | -2.74470900 | 1  | 2.62689400  | 2.21985400  | 1.57054100  |
| 1  | 0.79630700  | 0.76916600  | -3.64747900 | 1  | 1.75597800  | 4.26897500  | 2.61853100  |
| 6  | 2.96969700  | -0.40318300 | 0.30511900  | 6  | 0.71582700  | 0.20213200  | -1.46749900 |
| 6  | 4.38128400  | -0.45426500 | 0.57229700  | 6  | -0.45058600 | 0.85383800  | -1.96337400 |
| 6  | 2.14517800  | -1.31395000 | 0.95786700  | 1  | -0.99428500 | 0.34649000  | -2.76071000 |
| 6  | 4.89363800  | -1.37365100 | 1.54868100  | 6  | 2.78146500  | 0.22247600  | -0.05196000 |
| 6  | 5.30990800  | 0.37243600  | -0.12170500 | 6  | 4.04050900  | 0.87290700  | -0.28757500 |
| 6  | 2.65283200  | -2.22798400 | 1.91656500  | 6  | 2.78805700  | -0.99878500 | 0.60734600  |
| 6  | 3.99347400  | -2.24699600 | 2.21709100  | 6  | 5.25493700  | 0.27321500  | 0.18820500  |
| 6  | 6.29036000  | -1.40289700 | 1.81379600  | 6  | 4.13233200  | 2.09825700  | -1.00598700 |
| 6  | 6.65987700  | 0.31317100  | 0.15169600  | 6  | 3.98519300  | -1.59955500 | 1.06979100  |
| 1  | 4.93724900  | 1.05470300  | -0.88508400 | 6  | 5.19172600  | -0.97166400 | 0.87127300  |
| 1  | 1.94688000  | -2.90501700 | 2.40159800  | 6  | 6.49410500  | 0.93034200  | -0.04557500 |
| 1  | 4.38523800  | -2.94440600 | 2.96172700  | 6  | 5.35060200  | 2.70687700  | -1.22139200 |
| 6  | 7.15840700  | -0.57547100 | 1.13548500  | 1  | 3.21867500  | 2.55051700  | -1.39089600 |
| 1  | 6.66400900  | -2.10371100 | 2.56505800  | 1  | 3.91338700  | -2.55574100 | 1.59164800  |
| 1  | 7.35223400  | 0.95479900  | -0.39852600 | 1  | 6.11744200  | -1.42489800 | 1.23434300  |
| 1  | 8.22987500  | -0.60908000 | 1.34636700  | 6  | 6.54509500  | 2.12419800  | -0.73148600 |
| 8  | 1.65995800  | -1.11502500 | -2.13644800 | 1  | 7.41012400  | 0.46471500  | 0.32757300  |
| 50 | 0.30199100  | -2.40977700 | -1.27969400 | 1  | 5.39571500  | 3.64603900  | -1.77795800 |
| 8  | -3.34003100 | -0.13363300 | -1.00690800 | 1  | 7.50349300  | 2.61895300  | -0.90559600 |
| 8  | 0.80285800  | -1.38622600 | 0.66424000  | 8  | 1.00968100  | -1.01109400 | -1.96033200 |
| 1  | 0.05977000  | -0.58582100 | 1.18756700  | 8  | 1.62000000  | -1.70329500 | 0.80539200  |
|    |             |             |             | 50 | 0.94310800  | -2.85287500 | -1.01763800 |
|    |             |             |             | 8  | -2.19610500 | -1.04425600 | -0.45039200 |
|    |             |             |             | 1  | 0.69526700  | -1.10256000 | 1.08171300  |

**TS2a**

E = -1940.80947738    G = -1940.347715

|   |             |            |             |
|---|-------------|------------|-------------|
| 6 | -5.06673600 | 1.31523200 | -2.77361100 |
| 6 | -4.07616000 | 0.61623500 | -2.07202700 |

**TS2b'**

|     |                |             |              |             |                |             |              |
|-----|----------------|-------------|--------------|-------------|----------------|-------------|--------------|
| E = | -1940.80014385 | G =         | -1940.341047 | 50          | 1.02569500     | -2.80707700 | -1.10006400  |
| 6   | -7.23506400    | -0.17093500 | -0.47842000  | <b>TS2b</b> |                |             |              |
| 6   | -5.90607200    | -0.60900100 | -0.54209900  | E =         | -1940.80291188 | G =         | -1940.341743 |
| 6   | -4.87614900    | 0.25033400  | -0.17372100  | 6           | 6.57037100     | -2.27746000 | -1.46646500  |
| 6   | -5.15277200    | 1.56985700  | 0.27213200   | 6           | 5.42541900     | -1.82842600 | -0.79625500  |
| 6   | -6.48798200    | 1.99686000  | 0.30464500   | 6           | 5.33475900     | -0.49930400 | -0.39664900  |
| 6   | -7.52248200    | 1.13222500  | -0.06483900  | 6           | 6.38793500     | 0.41475000  | -0.66298900  |
| 1   | -8.04534600    | -0.84758900 | -0.76004100  | 6           | 7.53621100     | -0.06085300 | -1.31213200  |
| 1   | -5.66094300    | -1.61855700 | -0.87759700  | 6           | 7.62607600     | -1.39655000 | -1.71398600  |
| 6   | -4.04011500    | 2.43506300  | 0.70498400   | 6           | 6.63890400     | -3.31901200 | -1.78890900  |
| 1   | -6.71641600    | 3.01300000  | 0.63729400   | 1           | 4.59791000     | -2.50769800 | -0.58268400  |
| 1   | -8.55833100    | 1.47768900  | -0.02627900  | 6           | 6.23278500     | 0.18592200  | -0.27924200  |
| 6   | -2.82974600    | 1.93151400  | 1.02374800   | 1           | 8.35917400     | 0.62894000  | -1.51708700  |
| 1   | -4.24109000    | 3.50476700  | 0.81261400   | 1           | 8.52380100     | -1.74971400 | -2.22673100  |
| 1   | -2.02129400    | 2.56879700  | 1.38724700   | 6           | 5.02308200     | 2.36166900  | -0.00544100  |
| 6   | -3.41913400    | -0.06845800 | -0.27943300  | 1           | 7.12852400     | 2.45696400  | -0.28479600  |
| 1   | -3.02269700    | 0.45934800  | -1.17327900  | 1           | 4.90253100     | 3.42699800  | 0.20664800   |
| 6   | -2.65722800    | 0.44280000  | 0.93116200   | 6           | 4.21045500     | 0.08214600  | 0.39933400   |
| 1   | -3.12925800    | -0.01385800 | 1.82484900   | 1           | 4.56057200     | 0.18592200  | 1.44873900   |
| 8   | -3.06192100    | -1.44445600 | -0.38689500  | 6           | 3.82992900     | 1.45802000  | -0.11534000  |
| 1   | 0.61872800     | -1.19459200 | 1.40929700   | 1           | 3.59410000     | 1.34010000  | -1.19076200  |
| 6   | -1.30548000    | -0.23918700 | 0.71372900   | 8           | 2.98124900     | -0.65201000 | 0.43447600   |
| 1   | -0.68206700    | 0.33515900  | 0.02490900   | 1           | 0.14445000     | -0.49994600 | -0.77589400  |
| 8   | -1.78504000    | -2.54189400 | 1.34873000   | 6           | 2.48098700     | 1.69616100  | 0.59232500   |
| 6   | -0.57545000    | -0.70290800 | 1.95146800   | 1           | 2.61294000     | 2.07571400  | 1.61828500   |
| 1   | -0.26051100    | -0.00725400 | 2.73424500   | 8           | 1.08839200     | 0.31308400  | -0.90080100  |
| 6   | -1.11045900    | -1.95993500 | 2.27995500   | 6           | 1.47273000     | 2.45395400  | -0.22159500  |
| 6   | -1.74576800    | -1.56110500 | 0.01246400   | 1           | 1.37509200     | 3.53760600  | -0.21481200  |
| 8   | -0.98642500    | -2.16207300 | -0.84719800  | 6           | 0.78710500     | 1.63964100  | -1.04152900  |
| 6   | -0.88659700    | -2.71571900 | 3.54634400   | 6           | 1.96990500     | 0.24122800  | 0.67568000   |
| 1   | -1.85670200    | -2.89833800 | 4.03579300   | 8           | 1.08840700     | -0.10160100 | 1.52700400   |
| 1   | -0.44903200    | -3.70053700 | 3.31955900   | 6           | -0.17108200    | 1.98210300  | -2.12888300  |
| 1   | -0.23071000    | -2.16520700 | 4.23271600   | 1           | 0.30267300     | 1.81913100  | -3.11200700  |
| 6   | -0.06860700    | 4.53796600  | 0.44420300   | 1           | -1.06160100    | 1.34145500  | -2.08152500  |
| 6   | -0.50233400    | 3.88222200  | -0.68868200  | 1           | -0.49808000    | 3.02709100  | -2.05371100  |
| 6   | 0.06708600     | 2.64239500  | -1.08235700  | 6           | -3.21700400    | 4.49981100  | -0.84834800  |
| 6   | 1.12819000     | 2.06967900  | -0.30250800  | 6           | -2.62032600    | 4.28127000  | 0.37600000   |
| 6   | 1.53909400     | 2.76610200  | 0.87114200   | 6           | -2.38484200    | 2.96555900  | 0.85562200   |
| 6   | 0.95651300     | 3.96324200  | 1.23448500   | 6           | -2.76485600    | 1.83926100  | 0.05170500   |
| 1   | -1.21831700    | 2.36423100  | -2.81108900  | 6           | -3.38118100    | 2.10346200  | -1.20581700  |
| 1   | -0.51695800    | 5.48974200  | 0.73825400   | 6           | -3.60232400    | 3.39340900  | -1.64205400  |
| 1   | -1.30827800    | 4.29996400  | -1.29738600  | 1           | -1.48435300    | 3.59290600  | 2.72949500   |
| 6   | -0.40963000    | 1.92958000  | -2.21780100  | 1           | -3.39473600    | 5.51740400  | -1.20395500  |
| 6   | 1.70153000     | 0.81247800  | -0.69069000  | 1           | -2.31847700    | 5.12440000  | 1.00354400   |
| 1   | 2.32757100     | 2.33718100  | 1.48993100   | 6           | -1.77211900    | 2.73349200  | 2.11804900   |
| 1   | 1.29151700     | 4.47370000  | 2.14088800   | 6           | -2.49468000    | 0.50850700  | 0.52084200   |
| 6   | 1.16931200     | 0.11868500  | -1.78550000  | 1           | -3.67375200    | 1.26687400  | -1.83952600  |
| 6   | 0.11396900     | 0.70534500  | -2.54936500  | 1           | -4.07515200    | 3.56107100  | -2.61293100  |
| 1   | -0.26288400    | 0.13377400  | -3.39917300  | 6           | -1.89239300    | 0.32653300  | 1.76912400   |
| 6   | 2.84996900     | 0.23697400  | 0.06452700   | 6           | -1.53707600    | 1.45817800  | 2.56067800   |
| 6   | 4.12699700     | 0.89645700  | 0.07088000   | 1           | -1.06181000    | 1.26539900  | 3.52380200   |
| 6   | 2.71953100     | -0.95292300 | 0.77240400   | 6           | -2.84519300    | -0.67678900 | -0.31260000  |
| 6   | 5.21010700     | 0.35271700  | 0.84049600   | 6           | -4.21361600    | -0.98345600 | -0.62830000  |
| 6   | 4.36980900     | 2.07833800  | -0.68516700  | 6           | -1.85379900    | -1.51793100 | -0.81013300  |
| 6   | 3.79314400     | -1.49447800 | 1.52491300   | 6           | -4.52212500    | -2.08051900 | -1.50080200  |
| 6   | 5.00673400     | -0.85176000 | 1.56685200   | 6           | -5.29606800    | -0.24114400 | -0.07616500  |
| 6   | 6.46506300     | 1.02104600  | 0.84796700   | 6           | -2.15991500    | -2.60696600 | -1.66518600  |
| 6   | 5.60081900     | 2.69886600  | -0.66231700  | 6           | -3.46141900    | -2.87222400 | -2.01719600  |
| 1   | 3.56469000     | 2.48765400  | -1.29459400  | 6           | -5.88052200    | -2.36218400 | -1.81358200  |
| 1   | 3.61932300     | -2.42689300 | 2.06559100   | 6           | -6.60316500    | -0.54639500 | -0.39038400  |
| 1   | 5.83264500     | -1.26415300 | 2.15182400   | 1           | -5.07551600    | 0.57563200  | 0.61049100   |
| 6   | 6.65972700     | 2.17280400  | 0.11727700   | 1           | -1.33087600    | -3.21519400 | -2.03183700  |
| 1   | 7.27805000     | 0.59714100  | 1.44337300   | 1           | -3.69637900    | -3.70471300 | -2.68504700  |
| 1   | 5.76234800     | 3.60268000  | -1.25464100  | 6           | -6.90239700    | -1.61082300 | -1.27577300  |
| 1   | 7.62925600     | 2.67625400  | 0.12980200   | 1           | -6.09865400    | -3.19585300 | -2.48629400  |
| 8   | 1.60493000     | -1.09560000 | -2.13176300  | 1           | -7.41604400    | 0.03569500  | 0.05028800   |
| 8   | 1.54005200     | -1.66011300 | 0.76235300   |             |                |             |              |

|                          |             |             |             |                          |             |             |             |
|--------------------------|-------------|-------------|-------------|--------------------------|-------------|-------------|-------------|
| 1                        | -7.94225100 | -1.83882000 | -1.52152600 | 6                        | 3.26899100  | 4.15831800  | 0.28990900  |
| 8                        | -1.62895300 | -0.89693400 | 2.25402500  | 1                        | 2.15323800  | 5.00468100  | -1.34344500 |
| 8                        | -0.53386600 | -1.37630300 | -0.43962100 | 1                        | 4.26229900  | 3.01146200  | 1.84793900  |
| 50                       | 0.01110600  | -1.98569400 | 1.64926000  | 1                        | 3.59900700  | 5.12500400  | 0.67814200  |
| <b>TS<sub>PT-1</sub></b> |             |             |             |                          |             |             |             |
| E = -2268.09396792       |             |             |             | G = -2267.475365         |             |             |             |
| 6                        | 1.89393100  | -0.51963400 | 4.29446200  | 6                        | -3.99984900 | -1.71516800 | 0.14849500  |
| 6                        | 0.74847800  | -0.62670700 | 3.49708500  | 6                        | -4.97572900 | -2.79068300 | 0.61557300  |
| 6                        | 0.25571400  | 0.48454000  | 2.81537500  | 6                        | -5.39269900 | -1.63733900 | 2.61028700  |
| 6                        | 0.92115300  | 1.72495800  | 2.91772100  | 6                        | -4.41901400 | -0.52988200 | 2.21885700  |
| 6                        | 2.04503200  | 1.83031900  | 3.74908400  | 1                        | -5.99165700 | -2.61064100 | 0.20677100  |
| 6                        | 2.53297200  | 0.71468000  | 4.43291200  | 1                        | -4.64241800 | -3.77199500 | 0.24702700  |
| 1                        | 2.28276100  | -1.40098100 | 4.80998000  | 1                        | -2.98543100 | -1.96439600 | 0.48277100  |
| 1                        | 0.22718400  | -1.57921700 | 3.39495300  | 1                        | -4.00478300 | -1.61671700 | -0.94624200 |
| 6                        | 0.46365300  | 2.83753900  | 2.08363900  | 1                        | -6.43488000 | -1.37729700 | 2.33121100  |
| 1                        | 2.55572500  | 2.79245800  | 3.83164900  | 1                        | -5.36849700 | -1.77773400 | 3.70089800  |
| 1                        | 3.41998900  | 0.80656000  | 5.06444600  | 1                        | -4.71767100 | 0.43977900  | 2.64450400  |
| 6                        | -0.38066900 | 2.64241600  | 1.05728500  | 1                        | -3.41517900 | -0.79381800 | 2.57442000  |
| 1                        | 0.91387600  | 3.81973300  | 2.24316200  | 8                        | -5.01989800 | -2.86669400 | 2.02401700  |
| 1                        | -0.61152600 | 3.46312700  | 0.37523000  | 7                        | -4.30730600 | -0.38801800 | 0.74453800  |
| 6                        | -1.03361100 | 0.42213400  | 2.01332000  | 6                        | -5.47973200 | 0.25726100  | 0.12941600  |
| 1                        | -1.82831800 | 0.85627600  | 2.65489300  | 1                        | -5.60763000 | 1.25542300  | 0.56609000  |
| 6                        | -0.95620400 | 1.28072600  | 0.73852900  | 1                        | -5.30057800 | 0.36635300  | -0.94803800 |
| 1                        | -0.24134700 | 0.77365300  | 0.06632400  | 1                        | -6.40546100 | -0.31995400 | 0.27673100  |
| 8                        | -1.42941000 | -0.89835400 | 1.73313200  | <b>TS<sub>PT-2</sub></b> |             |             |             |
| 1                        | -0.77536000 | -1.26079500 | 1.07973400  | E = -2268.10184256       |             |             |             |
| 6                        | -2.28878900 | 1.38268600  | -0.01559600 | G = -2267.483733         |             |             |             |
| 1                        | -3.24552300 | 0.42566400  | 0.44393100  | 6                        | 3.33109200  | -0.30766600 | 3.40553400  |
| 8                        | -3.31411000 | 1.69620200  | -2.03659100 | 6                        | 2.14755900  | -0.96159400 | 3.04327100  |
| 6                        | -3.10256200 | 2.61880100  | -0.00351300 | 6                        | 0.93436700  | -0.27913700 | 3.04587400  |
| 1                        | -3.21421800 | 3.29605700  | 0.84066300  | 6                        | 0.89614800  | 1.08091100  | 3.43276600  |
| 6                        | -3.70401400 | 2.74510400  | -1.20221000 | 6                        | 2.07681500  | 1.71051400  | 3.84895800  |
| 6                        | -2.40401400 | 0.92664500  | -1.37889700 | 6                        | 3.29403300  | 1.02479600  | 3.82290200  |
| 8                        | -1.93320700 | -0.05848600 | -1.98578900 | 1                        | 4.28123800  | -0.84448700 | 3.36105000  |
| 6                        | -4.67853400 | 3.70113100  | -1.78175400 | 1                        | 2.16237000  | -2.00964400 | 2.74588300  |
| 1                        | -4.29637300 | 4.13650100  | -2.71973700 | 6                        | -0.38188800 | 1.79153700  | 3.33778900  |
| 1                        | -5.63822900 | 3.20918800  | -2.01884000 | 1                        | 2.04198500  | 2.75633300  | 4.16558400  |
| 1                        | -4.87313300 | 4.51601900  | -1.07094200 | 1                        | 4.21411000  | 1.53303200  | 4.12089500  |
| 6                        | 6.60309900  | -1.96689400 | -0.23460500 | 6                        | -1.38140000 | 1.31128500  | 2.57641900  |
| 6                        | 5.63886100  | -2.74302800 | 0.37113100  | 1                        | -0.48509600 | 2.74805600  | 3.85791500  |
| 6                        | 4.25869000  | -2.42448500 | 0.25119800  | 1                        | -2.32116700 | 1.86241300  | 2.49943700  |
| 6                        | 3.86342000  | -1.26415600 | -0.49598700 | 6                        | -0.38158300 | -0.94954100 | 2.68159000  |
| 6                        | 4.88640100  | -0.49717100 | -1.12434300 | 1                        | -0.95798700 | -1.06715900 | 3.62117600  |
| 6                        | 6.21631300  | -0.83828700 | -0.99805000 | 6                        | -1.20141000 | 0.02859200  | 1.79621500  |
| 1                        | 3.55322500  | -4.11439700 | 1.42030500  | 1                        | -0.59066600 | 0.25024100  | 0.89945200  |
| 1                        | 7.66065700  | -2.22360700 | -0.13690500 | 8                        | -0.25630400 | -2.22571700 | 2.14051300  |
| 1                        | 5.92071800  | -3.62597400 | 0.95143200  | 1                        | 0.30176500  | -2.17448200 | 1.32568900  |
| 6                        | 3.25353700  | -3.23622600 | 0.84228800  | 6                        | -2.48039100 | -0.62891900 | 1.32132500  |
| 6                        | 2.47411000  | -0.91663300 | -0.60458300 | 1                        | -3.21787600 | 0.40535200  | 0.61223200  |
| 1                        | 4.60119100  | 0.37000700  | -1.71944700 | 8                        | -3.41206300 | -2.49896100 | 0.40497300  |
| 1                        | 6.97916400  | -0.23386000 | -1.49507900 | 6                        | -3.48363000 | -1.20351400 | 2.23598200  |
| 6                        | 1.52276200  | -1.78365300 | -0.06196600 | 1                        | -3.75688300 | -0.81512500 | 3.21557100  |
| 6                        | 1.92472600  | -2.93508200 | 0.67157200  | 6                        | -4.02591200 | -2.28650900 | 1.63902700  |
| 1                        | 1.13893700  | -3.56116200 | 1.09997600  | 6                        | -2.43356500 | -1.56902400 | 0.23952600  |
| 6                        | 2.05073600  | 0.35648900  | -1.25619200 | 8                        | -1.75999500 | -1.57147200 | -0.82209000 |
| 6                        | 2.45166200  | 1.62480600  | -0.71012900 | 6                        | -5.08681500 | -3.25493400 | 2.01053000  |
| 6                        | 1.25296800  | 0.33017600  | -2.40471000 | 1                        | -5.92028400 | -3.24756900 | 1.28697500  |
| 6                        | 2.04686000  | 2.84175000  | -1.35650600 | 1                        | -4.68898700 | -4.28315100 | 2.03808600  |
| 6                        | 3.24207500  | 1.73562300  | 0.46894400  | 1                        | -5.48617500 | -3.01051100 | 3.00452800  |
| 6                        | 0.83322300  | 1.54926800  | -3.01527700 | 6                        | 6.49285600  | 1.07935500  | -1.31280000 |
| 6                        | 1.22257200  | 2.76480800  | -2.51206400 | 6                        | 6.24745800  | -0.12358000 | -0.68658400 |
| 6                        | 2.47091800  | 4.09161700  | -0.83212600 | 6                        | 4.92412500  | -0.62158200 | -0.54496700 |
| 6                        | 3.65043000  | 2.96332200  | 0.94443600  | 6                        | 3.81853900  | 0.14796900  | -1.04266000 |
| 1                        | 3.51854200  | 0.83208300  | 1.00952400  | 6                        | 4.11403200  | 1.37337800  | -1.70708800 |
| 1                        | 0.19923300  | 1.47175400  | -3.90035600 | 6                        | 5.41038300  | 1.82600500  | -1.83696900 |
| 1                        | 0.90439100  | 3.69213900  | -2.99642700 | 1                        | 5.51024600  | -2.46996800 | 0.43523900  |

|    |             |             |             |   |             |             |             |
|----|-------------|-------------|-------------|---|-------------|-------------|-------------|
| 1  | 7.51515900  | 1.45082600  | -1.41669000 | 8 | -0.02812500 | -1.51814400 | 0.97520200  |
| 1  | 7.07301400  | -0.72272700 | -0.29236300 | 1 | -0.41054000 | -1.87724600 | 0.03255800  |
| 6  | 4.66818700  | -1.88100300 | 0.06182100  | 6 | -1.65141400 | 0.21163100  | 0.18307800  |
| 6  | 2.47305600  | -0.33400500 | -0.87520400 | 1 | -1.05587500 | -0.93749700 | 1.09646100  |
| 1  | 3.29527800  | 1.95719100  | -2.12551200 | 8 | -3.52051100 | -0.85550100 | -0.56512500 |
| 1  | 5.60338300  | 2.76899600  | -2.35466900 | 6 | -2.82529400 | 1.03092300  | 0.46529300  |
| 6  | 2.27825100  | -1.58905800 | -0.29894600 | 1 | -2.84963900 | 1.99854900  | 0.96284300  |
| 6  | 3.38581000  | -2.35805100 | 0.16022200  | 6 | -3.90926000 | 0.35079100  | 0.01880500  |
| 1  | 3.17056900  | -3.33005300 | 0.60923600  | 6 | -2.16639700 | -0.93083300 | -0.51619200 |
| 6  | 1.32123800  | 0.50351900  | -1.31975300 | 8 | -1.52613100 | -1.92443700 | -0.93381100 |
| 6  | 1.11060700  | 1.80580900  | -0.75122900 | 6 | -5.36995200 | 0.60970100  | 0.05190400  |
| 6  | 0.46755900  | 0.06464000  | -2.34094600 | 1 | -5.79908500 | 0.59635200  | -0.96425500 |
| 6  | 0.13584000  | 2.69337600  | -1.31890300 | 1 | -5.90381300 | -0.15598000 | 0.64056100  |
| 6  | 1.83481600  | 2.26085500  | 0.38807300  | 1 | -5.56718100 | 1.59263900  | 0.50185100  |
| 6  | -0.49991800 | 0.96037000  | -2.88931900 |   |             |             |             |
| 6  | -0.64496100 | 2.24143900  | -2.41930100 |   |             |             |             |
| 6  | -0.04155200 | 3.99116400  | -0.76556900 |   |             |             |             |
| 6  | 1.62803000  | 3.51901900  | 0.91213300  |   |             |             |             |
| 1  | 2.54867500  | 1.58889600  | 0.86308400  |   |             |             |             |
| 1  | -1.10560700 | 0.58367100  | -3.71683100 |   |             |             |             |
| 1  | -1.39089600 | 2.90816400  | -2.85664800 |   |             |             |             |
| 6  | 0.68925300  | 4.40328600  | 0.32879500  |   |             |             |             |
| 1  | -0.76947200 | 4.66119500  | -1.23289300 |   |             |             |             |
| 1  | 2.19180800  | 3.83005100  | 1.79370600  |   |             |             |             |
| 1  | 0.54652300  | 5.40320300  | 0.74590900  |   |             |             |             |
| 8  | 1.04456000  | -2.11044500 | -0.13027700 |   |             |             |             |
| 8  | 0.51630400  | -1.17301400 | -2.84694200 |   |             |             |             |
| 50 | -0.12821700 | -2.80978300 | -1.74260300 |   |             |             |             |
| 6  | -3.29264200 | 2.60438200  | 0.01127000  |   |             |             |             |
| 6  | -3.90070400 | 3.55733600  | -1.01256700 |   |             |             |             |
| 6  | -4.54183800 | 1.77380900  | -2.39558600 |   |             |             |             |
| 6  | -3.94612100 | 0.75873800  | -1.42746400 |   |             |             |             |
| 1  | -4.94036900 | 3.82568500  | -0.73329800 |   |             |             |             |
| 1  | -3.31300600 | 4.48607400  | -1.03476200 |   |             |             |             |
| 1  | -2.22504400 | 2.45772100  | -0.19936200 |   |             |             |             |
| 1  | -3.38583700 | 3.01452600  | 1.02570500  |   |             |             |             |
| 1  | -5.62713100 | 1.91165600  | -2.21090700 |   |             |             |             |
| 1  | -4.42398300 | 1.40894400  | -3.42602500 |   |             |             |             |
| 1  | -4.49371300 | -0.19412700 | -1.44827600 |   |             |             |             |
| 1  | -2.90004400 | 0.55692100  | -1.69350200 |   |             |             |             |
| 8  | -3.87119800 | 3.01387900  | -2.31449300 |   |             |             |             |
| 7  | -3.94053400 | 1.26784100  | -0.02767400 |   |             |             |             |
| 6  | -5.25413300 | 1.22488200  | 0.63419800  |   |             |             |             |
| 1  | -5.63533800 | 0.19644600  | 0.60015000  |   |             |             |             |
| 1  | -5.12713800 | 1.50908600  | 1.68774700  |   |             |             |             |
| 1  | -5.98530100 | 1.90131600  | 0.16668500  |   |             |             |             |

**TS0-Re-Ca**

|     |                |             |              |
|-----|----------------|-------------|--------------|
| E = | -5944.81596737 | G =         | -5943.294337 |
| 6   | -3.67396600    | 2.57849700  | 1.30494700   |
| 6   | -4.20779800    | -0.93278000 | 1.18926700   |
| 6   | -2.78992800    | -1.13921500 | 1.39958100   |
| 6   | -2.56247700    | -1.07846900 | 2.81865600   |
| 6   | -3.79351300    | -0.81241000 | 3.47042900   |
| 6   | -4.79943700    | -0.71506800 | 2.47344800   |
| 15  | -1.32823600    | -1.44483900 | 0.32516100   |
| 15  | -1.33633100    | 2.04933400  | -0.40860100  |
| 6   | -1.86906100    | -2.17311500 | -1.28409900  |
| 6   | -0.62495900    | -2.92427200 | 1.17450900   |
| 6   | 0.72482300     | -3.23240500 | 0.99334900   |
| 6   | 1.28429800     | -4.38360300 | 1.57064900   |
| 6   | 0.46158100     | -5.22559100 | 2.32333300   |
| 6   | -0.90469400    | -4.94939400 | 2.50475000   |
| 6   | -1.43642900    | -3.79574400 | 1.92240700   |
| 6   | -2.28130600    | -1.33273000 | -2.32663400  |
| 6   | -2.57368000    | -1.84696800 | -3.59529300  |
| 6   | -2.41834500    | -3.22320100 | -3.81402900  |
| 6   | -1.99630500    | -4.08273300 | -2.79444200  |
| 6   | -1.73045800    | -3.54453600 | -1.52737400  |
| 26  | -3.30018200    | 0.69753400  | 2.14521100   |
| 6   | -2.31560700    | 2.16844900  | 1.11538100   |
| 6   | -3.94119400    | 2.60249100  | 2.69996900   |
| 6   | -1.72404100    | 1.96137600  | 2.42385900   |
| 6   | -2.74860000    | 2.23502600  | 3.38583900   |
| 1   | 1.35606300     | -2.54373900 | 0.43881800   |
| 1   | -2.49648300    | -3.58455300 | 2.05083300   |
| 1   | -2.36054200    | -0.26167500 | -2.16231800  |
| 1   | -1.39033100    | -4.21036600 | -0.73527400  |
| 1   | -3.92694100    | -0.67243100 | 4.54121500   |
| 1   | -5.85284700    | -0.50785000 | 2.64092700   |
| 1   | -4.89947100    | 2.83346300  | 3.16119500   |
| 1   | -2.65379200    | 2.13367200  | 4.46230700   |
| 1   | -4.37601200    | 2.83934500  | 0.52002900   |
| 1   | 0.88787300     | -6.12357100 | 2.78110700   |
| 1   | -2.62523800    | -3.63234900 | -4.80701300  |
| 45  | 0.19076900     | 0.35148400  | -0.19873700  |
| 6   | -0.56955800    | 3.73401300  | -0.40339300  |
| 6   | 0.77377500     | 3.92772900  | -0.07611800  |
| 6   | -1.39146100    | 4.84795900  | -0.63239100  |
| 6   | 1.31799000     | 5.21749500  | -0.00061400  |
| 1   | 1.40419700     | 3.06914300  | 0.13642900   |
| 6   | -0.87892200    | 6.14774500  | -0.55667800  |
| 1   | -2.44589100    | 4.70737100  | -0.87991700  |
| 6   | 0.48008000     | 6.31115400  | -0.24583200  |
| 1   | 0.89439700     | 7.32282100  | -0.19378500  |
| 6   | -2.43781400    | 2.19383100  | -1.86558900  |
| 6   | -3.77043700    | 1.77838500  | -1.88601500  |
| 6   | -1.85143000    | 2.68499000  | -3.04701800  |
| 6   | -4.54016600    | 1.86929200  | -3.05967400  |

**TS'PT-I**

|     |                |             |             |
|-----|----------------|-------------|-------------|
| E = | -806.003110837 | G =         | -805.790114 |
| 6   | 4.2584520      | -1.26592100 | -0.06039400 |
| 6   | 2.92066100     | -1.39607100 | 0.33357000  |
| 6   | 2.08678000     | -0.28257800 | 0.33058200  |
| 6   | 2.57618000     | 0.99384600  | -0.05599800 |
| 6   | 3.92547000     | 1.10724500  | -0.41947200 |
| 6   | 4.75899100     | -0.01478700 | -0.42785300 |
| 1   | 4.91009000     | -2.14248400 | -0.07103600 |
| 1   | 2.52316200     | -2.36411500 | 0.64574900  |
| 6   | 1.65725600     | 2.14622600  | -0.07613100 |
| 1   | 4.31998700     | 2.08414500  | -0.71082500 |
| 1   | 5.80537900     | 0.08928900  | -0.72397300 |
| 6   | 0.31805100     | 1.98313900  | -0.10028600 |
| 1   | 2.09775600     | 3.14525500  | -0.13350900 |
| 1   | -0.36265700    | 2.83339500  | -0.18317500 |
| 6   | 0.67051600     | -0.26226600 | 0.80663900  |
| 1   | 0.64713100     | 0.19641300  | 1.81389600  |
| 6   | -0.20915400    | 0.57541000  | -0.12827900 |
| 1   | -0.00190800    | 0.18721500  | -1.14888000 |

|   |              |             |             |    |             |             |             |
|---|--------------|-------------|-------------|----|-------------|-------------|-------------|
| 1 | -4.21583400  | 1.36298600  | -0.98751500 | 1  | 1.04748500  | -0.73877700 | 2.46010400  |
| 6 | -2.59205000  | 2.78998400  | -4.22673700 | 6  | -0.05924900 | -0.07320500 | 6.11501300  |
| 1 | -0.81179100  | 3.01926900  | -3.04173200 | 1  | -0.82971000 | 1.80156100  | 5.40065400  |
| 6 | -3.93752100  | 2.38609000  | -4.20938500 | 6  | 0.58575400  | -1.27093400 | 5.79114500  |
| 1 | -4.52590100  | 2.46194300  | -5.12815300 | 1  | 1.49131200  | -2.43069600 | 4.19929900  |
| 6 | 2.76810100   | 5.42208900  | 0.36233100  | 1  | -0.35366700 | 0.12724900  | 7.14799400  |
| 1 | 3.22767500   | 6.21989600  | -0.24117800 | 1  | 0.78616100  | -2.01309600 | 6.56733600  |
| 1 | 2.87563800   | 5.71589400  | 1.42034000  | 6  | 1.98684300  | 2.50211300  | 2.74250100  |
| 1 | 3.35386000   | 4.50182000  | 0.21815400  | 1  | 2.56831500  | 3.39862700  | 2.47843800  |
| 6 | -1.75536300  | 7.34823300  | -0.80962600 | 1  | 2.33054500  | 2.15463100  | 3.73873800  |
| 1 | -1.76707400  | 8.02282700  | 0.06187700  | 1  | 2.22389500  | 1.70619300  | 2.01977000  |
| 1 | -1.38769200  | 7.93648100  | -1.66639200 | 6  | 0.18248100  | 3.92144500  | 3.52033200  |
| 1 | -2.79274500  | 7.05350000  | -1.02317100 | 1  | 0.35473600  | 3.75529000  | 4.60574500  |
| 6 | -5.97196100  | 1.40078700  | -3.07694600 | 1  | 0.76709600  | 4.80772400  | 3.22504200  |
| 1 | -6.59895500  | 1.98782800  | -2.38863100 | 1  | -0.87746700 | 4.16304900  | 3.36744600  |
| 1 | -6.40576700  | 1.47873100  | -4.08366600 | 6  | 2.52423000  | -1.49472300 | -1.68804100 |
| 1 | -6.05422400  | 0.35361500  | -2.74689100 | 6  | 3.15902100  | -2.72071200 | -1.85536500 |
| 6 | -1.97247400  | 3.32074900  | -5.49375800 | 1  | 4.03354200  | -2.96294600 | -1.24799600 |
| 1 | -2.01598600  | 2.57060900  | -6.30040000 | 6  | 2.66727500  | -3.64815500 | -2.78508200 |
| 1 | -2.51091200  | 4.21170500  | -5.85515800 | 1  | 3.15996300  | -4.61612000 | -2.90431500 |
| 1 | -0.91943400  | 3.59899700  | -5.34445800 | 6  | 1.54315800  | -3.33382200 | -3.55124100 |
| 6 | -1.79144400  | -5.55519000 | -3.04189500 | 1  | 1.15252900  | -4.05215500 | -4.27527300 |
| 1 | -2.16094900  | -5.85741700 | -4.03233300 | 6  | 0.90417400  | -2.10057800 | -3.38800500 |
| 1 | -0.72051700  | -5.81359100 | -2.98590300 | 1  | 0.02232600  | -1.86207400 | -3.98153100 |
| 1 | -2.30784700  | -6.16425400 | -2.28311300 | 6  | 1.37990000  | -1.17677000 | -2.45171600 |
| 6 | -3.03941300  | -0.93905900 | -4.70345200 | 6  | 0.74073900  | 0.13788600  | -2.23487900 |
| 1 | -4.10713100  | -0.68838900 | -4.58828600 | 6  | 1.53224600  | 1.22857200  | -1.71752500 |
| 1 | -2.49416800  | 0.01533400  | -4.69793300 | 6  | 2.77696200  | 0.92743900  | -1.08099800 |
| 1 | -2.91477400  | -1.40992100 | -5.68939600 | 6  | 2.87402800  | -0.51542600 | -0.58883800 |
| 6 | -1.77005200  | -5.87431700 | 3.32286300  | 1  | 3.87865600  | -0.72257100 | -0.19028200 |
| 1 | -2.83195800  | -5.59652800 | 3.25704500  | 1  | -0.08263700 | 0.37897300  | -2.91085200 |
| 1 | -1.66856800  | -6.91951100 | 2.98960400  | 1  | 3.19181600  | 1.66906900  | -0.39346900 |
| 1 | -1.48234900  | -5.84659200 | 4.38731200  | 1  | 1.30673900  | 2.25553900  | -2.00430700 |
| 6 | 2.74722400   | -4.68414900 | 1.36065300  | 8  | 1.92748500  | -0.61877700 | 0.42766400  |
| 1 | 3.08825900   | -5.51830900 | 1.99076000  | 6  | 5.37039900  | 0.59389200  | -1.77057500 |
| 1 | 2.94496100   | -4.94956800 | 0.30886000  | 6  | 4.32145500  | 1.26618000  | -2.44285000 |
| 1 | 3.36682600   | -3.80227400 | 1.58822100  | 6  | 4.16058500  | 0.51417000  | -3.68596100 |
| 1 | -1.60299500  | -1.20068000 | 3.30589100  | 6  | 4.99567000  | -0.54603200 | -3.64417700 |
| 6 | -0.26788500  | 1.61592500  | 2.66340900  | 8  | 5.72897100  | -0.50556500 | -2.44107600 |
| 1 | 0.05451300   | 1.06545700  | 1.74178000  | 1  | 4.19028200  | 2.34291200  | -2.35556900 |
| 6 | -5.01399900  | -1.15981600 | -0.07379900 | 1  | 3.46043300  | 0.73710100  | -4.48687200 |
| 1 | -4.55553800  | -0.57209000 | -0.88542300 | 8  | 5.90654300  | 0.86851300  | -0.63693900 |
| 7 | -4.87616800  | -2.54426900 | -0.49959500 | 6  | 5.28777600  | -1.68633400 | -4.53993600 |
| 6 | -6.45034100  | -0.64692200 | 0.09782100  | 1  | 5.08251200  | -2.64330700 | -4.03677000 |
| 6 | -6.70040000  | 0.72780200  | 0.22676600  | 1  | 4.65077600  | -1.62444100 | -5.43194100 |
| 6 | -7.54295500  | -1.52076200 | 0.15667700  | 1  | 6.34336400  | -1.68410500 | -4.85785400 |
| 6 | -7.99487600  | 1.21786800  | 0.39942400  | 14 | 7.21432600  | 0.24959000  | 0.38431100  |
| 1 | -5.86445000  | 1.42394600  | 0.21705100  | 6  | 6.72026000  | 0.96481800  | 2.06370000  |
| 6 | -8.84463500  | -1.03639500 | 0.32669200  | 1  | 7.04936700  | 2.02046400  | 2.01581500  |
| 1 | -7.38387600  | -2.59373100 | 0.07239700  | 6  | 8.72255500  | 1.10924900  | -0.36555000 |
| 6 | -9.07768400  | 0.33422200  | 0.44683500  | 1  | 8.35435900  | 2.14006300  | -0.53182700 |
| 1 | -8.15980300  | 2.29358200  | 0.50005400  | 6  | 7.24103200  | -1.63995100 | 0.25008300  |
| 1 | -9.67990200  | -1.73944200 | 0.36691300  | 1  | 7.17206000  | -1.83607900 | -0.83416500 |
| 1 | -10.09367800 | 0.71248300  | 0.57984000  | 6  | 7.47798500  | 0.29191200  | 3.22275300  |
| 6 | -5.33286900  | -2.85312000 | -1.83193800 | 1  | 7.27238900  | 0.81364900  | 4.17162700  |
| 1 | -6.42408100  | -3.04479000 | -1.90863300 | 1  | 7.16275300  | -0.75463800 | 3.35566300  |
| 1 | -5.09262600  | -2.02248500 | -2.51059500 | 1  | 8.56907600  | 0.29440300  | 3.07728500  |
| 1 | -4.80811700  | -3.74626900 | -2.20555800 | 6  | 5.20206300  | 0.96309700  | 2.31055500  |
| 6 | -4.97354900  | -3.63609700 | 0.43920600  | 1  | 4.96970300  | 1.41635600  | 3.28813800  |
| 1 | -4.29301600  | -4.45137900 | 0.13290700  | 1  | 4.66393100  | 1.53498500  | 1.54249600  |
| 1 | -4.67388000  | -3.31087000 | 1.44333200  | 1  | 4.77917900  | -0.05332800 | 2.31727900  |
| 1 | -5.98952100  | -4.07643000 | 0.52608900  | 6  | 9.11752500  | 0.52702100  | -1.73272100 |
| 7 | 0.57392000   | 2.80739100  | 2.68589400  | 1  | 8.27141900  | 0.49198100  | -2.43618900 |
| 6 | 0.02187100   | 0.62771300  | 3.78726800  | 1  | 9.91084600  | 1.13370300  | -2.19941400 |
| 6 | 0.71629000   | -0.55322400 | 3.48336700  | 1  | 9.50732800  | -0.49900000 | -1.63841500 |
| 6 | -0.33397800  | 0.87157300  | 5.12223200  | 6  | 9.92625200  | 1.20084100  | 0.58710500  |
| 6 | 0.98239300   | -1.50317500 | 4.47172300  | 1  | 9.67211500  | 1.71109200  | 1.52866400  |

|   |             |             |            |   |             |             |             |
|---|-------------|-------------|------------|---|-------------|-------------|-------------|
| 1 | 10.32810900 | 0.20793300  | 0.84234000 | 1 | -0.05567200 | -4.25061400 | -4.55925100 |
| 1 | 10.74506500 | 1.77046600  | 0.11748500 | 6 | -4.53583400 | -1.05485300 | 3.48163000  |
| 6 | 8.57660100  | -2.22421500 | 0.74893300 | 1 | -5.52598300 | -1.51283500 | 3.61914000  |
| 1 | 9.44136000  | -1.83246400 | 0.19434200 | 1 | -4.09559700 | -0.93446800 | 4.48493600  |
| 1 | 8.74210700  | -2.01656600 | 1.81761800 | 1 | -4.67462100 | -0.04568900 | 3.06525100  |
| 1 | 8.58042700  | -3.32016500 | 0.62869100 | 6 | -3.34315600 | -5.56640300 | 1.55099400  |
| 6 | 6.05674600  | -2.33975200 | 0.93620600 | 1 | -3.38994700 | -6.05091700 | 2.53933800  |
| 1 | 5.08305300  | -1.94382900 | 0.61782400 | 1 | -4.31570300 | -5.74360000 | 1.06147500  |
| 1 | 6.06244600  | -3.41905400 | 0.71042500 | 1 | -2.57128100 | -6.07709600 | 0.95784200  |
| 1 | 6.10589100  | -2.23903900 | 2.03124000 | 6 | 2.35715200  | -4.42026800 | -3.32723600 |
|   |             |             |            | 1 | 2.80813000  | -5.06578900 | -2.56099600 |
|   |             |             |            | 1 | 2.14819600  | -5.02820600 | -4.21861800 |
|   |             |             |            | 1 | 3.12934200  | -3.68120800 | -3.59491800 |
|   |             |             |            | 6 | -2.44674700 | -3.03949300 | -4.05574000 |
|   |             |             |            | 1 | -2.19723800 | -3.18045800 | -5.11752900 |
|   |             |             |            | 1 | -3.13144200 | -3.85555000 | -3.76866300 |
|   |             |             |            | 1 | -3.00616500 | -2.09781100 | -3.95354400 |
|   |             |             |            | 6 | 3.79712000  | 3.52277700  | -4.50374700 |
|   |             |             |            | 1 | 3.78260100  | 3.46216900  | -5.60137100 |
|   |             |             |            | 1 | 3.29223600  | 4.45646100  | -4.20560200 |
|   |             |             |            | 1 | 4.84730100  | 3.60943700  | -4.18119200 |
|   |             |             |            | 6 | 1.22941100  | -0.82048000 | -4.89782500 |
|   |             |             |            | 1 | 1.81945300  | -1.75115200 | -4.89469200 |
|   |             |             |            | 1 | 0.23279000  | -1.08517100 | -4.51690800 |
|   |             |             |            | 1 | 1.13031100  | -0.49227500 | -5.94255800 |
|   |             |             |            | 6 | 6.60128900  | 4.08382400  | 0.87620200  |
|   |             |             |            | 1 | 7.08381900  | 3.14759200  | 0.56009400  |
|   |             |             |            | 1 | 6.98450800  | 4.89856600  | 0.24112700  |
|   |             |             |            | 1 | 6.92914600  | 4.29856300  | 1.90716400  |
|   |             |             |            | 6 | 2.04119000  | 6.27603100  | 1.15906700  |
|   |             |             |            | 1 | 2.63223600  | 7.14175200  | 1.49095100  |
|   |             |             |            | 1 | 1.52379700  | 6.55590600  | 0.22614600  |
|   |             |             |            | 1 | 1.25947800  | 6.08260300  | 1.91120400  |
|   |             |             |            | 1 | 3.46377000  | 0.95073600  | 2.72954800  |
|   |             |             |            | 6 | 0.56553200  | -0.15423500 | 3.37607800  |
|   |             |             |            | 1 | 0.30777800  | 0.38808400  | 2.43224800  |
|   |             |             |            | 6 | 4.48617900  | -1.61769500 | -1.16990300 |
|   |             |             |            | 1 | 3.54756800  | -1.49975300 | -1.73277100 |
|   |             |             |            | 7 | 5.39118300  | -0.60638800 | -1.71985600 |
|   |             |             |            | 6 | 4.93122500  | -3.07854900 | -1.34374700 |
|   |             |             |            | 6 | 4.47653600  | -4.10284600 | -0.49850400 |
|   |             |             |            | 6 | 5.76610700  | -3.44220700 | -2.41176900 |
|   |             |             |            | 6 | 4.83498400  | -5.43642700 | -0.71071800 |
|   |             |             |            | 1 | 3.83947300  | -3.85069800 | 0.34406500  |
|   |             |             |            | 6 | 6.12421000  | -4.77478400 | -2.63196000 |
|   |             |             |            | 1 | 6.14447700  | -2.68011100 | -3.08865900 |
|   |             |             |            | 6 | 5.65966000  | -5.78190300 | -1.78318600 |
|   |             |             |            | 1 | 4.46642600  | -6.20857900 | -0.03061700 |
|   |             |             |            | 1 | 6.77575100  | -5.02454800 | -3.47264200 |
|   |             |             |            | 1 | 5.94282700  | -6.82310700 | -1.95255500 |
|   |             |             |            | 6 | 5.32093900  | -0.28892000 | -3.12785500 |
|   |             |             |            | 1 | 6.04124100  | -0.85175000 | -3.75910300 |
|   |             |             |            | 1 | 4.31372700  | -0.48570300 | -3.51151800 |
|   |             |             |            | 1 | 5.53153700  | 0.78236400  | -3.28500300 |
|   |             |             |            | 6 | 6.72049100  | -0.49786900 | -1.16266800 |
|   |             |             |            | 1 | 7.14897900  | 0.47911800  | -1.44176300 |
|   |             |             |            | 1 | 6.69163100  | -0.54284900 | -0.06551900 |
|   |             |             |            | 1 | 7.42484700  | -1.28132600 | -1.51571400 |
|   |             |             |            | 7 | -0.72570900 | -0.39054900 | 4.02183400  |
|   |             |             |            | 6 | 1.45328200  | 0.82923500  | 4.13054400  |
|   |             |             |            | 6 | 1.56818800  | 2.13889500  | 3.64110300  |
|   |             |             |            | 6 | 2.11892400  | 0.49986400  | 5.32111100  |
|   |             |             |            | 6 | 2.38605000  | 3.07457800  | 4.27759900  |
|   |             |             |            | 1 | 1.01989100  | 2.42817300  | 2.74339100  |
|   |             |             |            | 6 | 2.93052700  | 1.43744100  | 5.96563300  |
|   |             |             |            | 1 | 2.01343200  | -0.49226000 | 5.75847200  |
|   |             |             |            | 6 | 3.07999700  | 2.72356500  | 5.43798200  |

**TS0-Si-C $\alpha$**   
E = -5944.82335317    G = -5943.299493

|    |             |             |             |
|----|-------------|-------------|-------------|
| 6  | 1.70228500  | -3.32842300 | 1.62983100  |
| 6  | 4.22250500  | -1.22135200 | 0.27118800  |
| 6  | 3.47669200  | -0.07077100 | 0.73081400  |
| 6  | 3.84261200  | 0.15455500  | 2.10151000  |
| 6  | 4.75953400  | -0.84950500 | 2.50161200  |
| 6  | 4.98647100  | -1.69666700 | 1.38499600  |
| 15 | 2.25830000  | 1.09715400  | -0.00749400 |
| 15 | -0.17073200 | -1.43422200 | 0.40469300  |
| 6  | 2.45366300  | 1.13681200  | -1.85009200 |
| 6  | 3.06969600  | 2.68041000  | 0.45921000  |
| 6  | 2.29285700  | 3.82057900  | 0.66522100  |
| 6  | 2.90125200  | 5.05598000  | 0.94598000  |
| 6  | 4.29542600  | 5.11859900  | 1.01216200  |
| 6  | 5.09894900  | 3.98395800  | 0.79629400  |
| 6  | 4.47266300  | 2.76772200  | 0.51569500  |
| 6  | 1.83931600  | 0.16119800  | -2.64932800 |
| 6  | 1.87915400  | 0.23976800  | -4.04761500 |
| 6  | 2.52645600  | 1.33328000  | -4.64113000 |
| 6  | 3.12969900  | 2.33041500  | -3.86930900 |
| 6  | 3.09011800  | 2.21703600  | -2.47244000 |
| 26 | 2.96512700  | -1.67953600 | 1.88988900  |
| 6  | 0.98085700  | -2.09207700 | 1.64117000  |
| 6  | 2.40544400  | -3.44426500 | 2.85810800  |
| 6  | 1.21856400  | -1.44472400 | 2.91926000  |
| 6  | 2.10578400  | -2.29936300 | 3.64928400  |
| 1  | 1.20611800  | 3.73790100  | 0.64181000  |
| 1  | 5.08220500  | 1.88373900  | 0.32176200  |
| 1  | 1.30399700  | -0.66276300 | -2.18623200 |
| 1  | 3.55197400  | 2.99989300  | -1.87349000 |
| 1  | 5.18331900  | -0.96248200 | 3.49740800  |
| 1  | 5.64339700  | -2.56249900 | 1.36535400  |
| 1  | 3.07724500  | -4.25443400 | 3.13559200  |
| 1  | 2.52382400  | -2.09503400 | 4.62942900  |
| 1  | 1.71074500  | -4.05264300 | 0.82180000  |
| 1  | 4.77787400  | 6.07526600  | 1.23498400  |
| 1  | 2.54913200  | 1.41263900  | -5.73163900 |
| 45 | -0.09833000 | 0.84775800  | 0.41892500  |
| 6  | -1.74075200 | -2.11905500 | 1.11215300  |
| 6  | -2.57661400 | -1.32943300 | 1.90360300  |
| 6  | -1.98956700 | -3.49754600 | 1.00289000  |
| 6  | -3.65242500 | -1.90207600 | 2.60212800  |
| 1  | -2.38500900 | -0.26255700 | 1.99162900  |
| 6  | -3.05932900 | -4.09157600 | 1.67853400  |
| 1  | -1.33843900 | -4.12187900 | 0.38772800  |
| 6  | -3.87387600 | -3.27680100 | 2.48172200  |
| 1  | -4.71174100 | -3.73035100 | 3.01940100  |
| 6  | -0.04309300 | -2.40062600 | -1.14773400 |
| 6  | 1.10699100  | -3.06229500 | -1.59266900 |
| 6  | -1.18831200 | -2.37966000 | -1.96413000 |
| 6  | 1.11228700  | -3.73839400 | -2.82581000 |
| 1  | 2.01552700  | -3.04606800 | -0.99508300 |
| 6  | -1.20919400 | -3.04371000 | -3.19439600 |
| 1  | -2.08700400 | -1.86132500 | -1.62603200 |
| 6  | -0.05421400 | -3.72878000 | -3.59837000 |

|    |             |             |             |                   |                                 |             |             |
|----|-------------|-------------|-------------|-------------------|---------------------------------|-------------|-------------|
| 1  | 2.48700800  | 4.07547300  | 3.85258400  | 1                 | -9.49904500                     | -1.02430400 | -1.35510100 |
| 1  | 3.45097800  | 1.15968500  | 6.88533800  | 1                 | -9.17085900                     | -0.65868400 | -3.05748800 |
| 1  | 3.72601200  | 3.44985600  | 5.93639400  | 6                 | -8.40724900                     | 1.58394200  | -1.60728200 |
| 6  | -1.44427300 | 0.84007000  | 4.29085800  | 1                 | -7.71019700                     | 2.39807400  | -1.35113300 |
| 1  | -2.48696400 | 0.60722000  | 4.55044800  | 1                 | -8.87502100                     | 1.84402000  | -2.57108400 |
| 1  | -1.01226900 | 1.43568100  | 5.12048700  | 1                 | -9.20578700                     | 1.58415400  | -0.84870100 |
| 1  | -1.44170600 | 1.47750900  | 3.39216200  | <b>TS0-Re- Cu</b> |                                 |             |             |
| 6  | -0.77449700 | -1.33517200 | 5.11715600  | E =               | -5944.81596737 G = -5943.294337 |             |             |
| 1  | -0.31986000 | -0.95807700 | 6.05819700  | 6                 | -3.67396600                     | 2.57849700  | 1.30494700  |
| 1  | -1.82743600 | -1.57546100 | 5.33489100  | 6                 | -4.20779800                     | -0.93278000 | 1.18926700  |
| 1  | -0.27653100 | -2.27312300 | 4.83843000  | 6                 | -2.78992800                     | -1.13921500 | 1.39958100  |
| 6  | -1.03968100 | 3.67207000  | -1.01998300 | 6                 | -2.56247700                     | -1.07846900 | 2.81865600  |
| 6  | -0.75454500 | 4.97194500  | -1.42469500 | 6                 | -3.79351300                     | -0.81241000 | 3.47042900  |
| 1  | -0.95617000 | 5.80447900  | -0.74518000 | 6                 | -4.79943700                     | -0.71506800 | 2.47344800  |
| 6  | -0.21368400 | 5.21283100  | -2.69589200 | 15                | -1.32823600                     | -1.44483900 | 0.32516100  |
| 1  | 0.01414800  | 6.23427100  | -3.00898200 | 15                | -1.33633100                     | 2.04933400  | -0.40860100 |
| 6  | 0.03450200  | 4.14157000  | -3.55710100 | 6                 | -1.86906100                     | -2.17311500 | -1.28409900 |
| 1  | 0.45500800  | 4.32013300  | -4.54913200 | 6                 | -0.62495900                     | -2.92427200 | 1.17450900  |
| 6  | -0.23921700 | 2.83271500  | -3.14786700 | 6                 | 0.72482300                      | -3.23240500 | 0.99334900  |
| 1  | -0.03498400 | 1.99934900  | -3.81898600 | 6                 | 1.28429800                      | -4.38360300 | 1.57064900  |
| 6  | -0.76430100 | 2.58337800  | -1.87635500 | 6                 | 0.46158100                      | -5.22559100 | 2.32333300  |
| 6  | -1.08584100 | 1.21947700  | -1.40589200 | 6                 | -0.90469400                     | -4.94939400 | 2.50475000  |
| 6  | -2.11772500 | 1.03728200  | -0.41253000 | 6                 | -1.43642900                     | -3.79574400 | 1.92240700  |
| 6  | -2.60040900 | 2.19645800  | 0.28955700  | 6                 | -2.28130600                     | -1.33273000 | -2.32663400 |
| 6  | -1.54563600 | 3.31992600  | 0.36187000  | 6                 | -2.57368000                     | -1.84696800 | -3.59529300 |
| 1  | -1.96316600 | 4.21379800  | 0.86219500  | 6                 | -2.41834500                     | -3.22320100 | -3.81402900 |
| 1  | -0.92420700 | 0.42150700  | -2.13410200 | 6                 | -1.99630500                     | -4.08273300 | -2.79444200 |
| 1  | -3.13860200 | 2.01042000  | 1.22462200  | 6                 | -1.73045800                     | -3.54453600 | -1.52737400 |
| 1  | -2.70608100 | 0.11935400  | -0.39550900 | 26                | -3.30018200                     | 0.69753400  | 2.14521100  |
| 8  | -0.49675600 | 2.78423300  | 1.10105800  | 6                 | -2.31560700                     | 2.16844900  | 1.11538100  |
| 6  | -4.91922800 | 1.82302200  | -0.81030400 | 6                 | -3.94119400                     | 2.60249100  | 2.69996900  |
| 6  | -4.20442500 | 3.04160600  | -0.64903100 | 6                 | -1.72404100                     | 1.96137600  | 2.42385900  |
| 6  | -3.79201500 | 3.38584400  | -2.01165400 | 6                 | -2.74860000                     | 2.23502600  | 3.38583900  |
| 6  | -4.06356900 | 2.32952200  | -2.80341300 | 1                 | 1.35606300                      | -2.54373900 | 0.43881800  |
| 8  | -4.75502300 | 1.35687000  | -2.04360100 | 1                 | -2.49648300                     | -3.58455300 | 2.05083300  |
| 1  | -4.46711700 | 3.76021900  | 0.12613700  | 1                 | -2.36054200                     | -0.26167500 | -2.16231800 |
| 1  | -3.27303400 | 4.28671400  | -2.32038400 | 1                 | -1.39033100                     | -4.21036600 | -0.73527400 |
| 8  | -5.55362600 | 1.11962300  | 0.05228800  | 1                 | -3.92694100                     | -0.67243100 | 4.54121500  |
| 6  | -3.77537200 | 1.97016900  | -4.20858200 | 1                 | -5.85284700                     | -0.50785000 | 2.64092700  |
| 1  | -4.69553600 | 1.73538700  | -4.76782700 | 1                 | -4.89947100                     | 2.83346300  | 3.16119500  |
| 1  | -3.26340800 | 2.80836900  | -4.69883700 | 1                 | -2.65379200                     | 2.13367200  | 4.46230700  |
| 1  | -3.11279900 | 1.08984600  | -4.25980300 | 1                 | -4.37601200                     | 2.83934500  | 0.52002900  |
| 14 | -6.72985000 | -0.21441000 | -0.13534900 | 1                 | 0.88787300                      | -6.12357100 | 2.78110700  |
| 6  | -7.65221400 | -0.10984900 | 1.51229000  | 1                 | -2.62523800                     | -3.63234900 | -4.80701300 |
| 1  | -7.02376000 | -0.69386600 | 2.20716400  | 45                | 0.19076900                      | 0.35148400  | -0.19873700 |
| 6  | -5.68400900 | -1.77904000 | -0.27937300 | 6                 | -0.56955800                     | 3.73401300  | -0.40339300 |
| 1  | -4.87480000 | -1.61315100 | 0.45170800  | 6                 | 0.77377500                      | 3.92772900  | -0.07611800 |
| 6  | -7.71086200 | 0.21683000  | -1.69266500 | 6                 | -1.39146100                     | 4.84795900  | -0.63239100 |
| 1  | -6.94385800 | 0.27499200  | -2.48411600 | 6                 | 1.31799000                      | 5.21749500  | -0.00061400 |
| 6  | -9.03265300 | -0.78843800 | 1.45009100  | 1                 | 1.40419700                      | 3.06914300  | 0.13642900  |
| 1  | -9.47692600 | -0.84556000 | 2.45716200  | 6                 | -0.87892200                     | 6.14774500  | -0.55667800 |
| 1  | -9.73247300 | -0.21625700 | 0.82124000  | 1                 | -2.44589100                     | 4.70737100  | -0.87991700 |
| 1  | -8.98897800 | -1.81377600 | 1.05225300  | 6                 | 0.48008000                      | 6.31115400  | -0.24583200 |
| 6  | -7.76319100 | 1.31604700  | 2.07560800  | 1                 | 0.89439700                      | 7.32282100  | -0.19378500 |
| 1  | -8.26654000 | 1.30103700  | 3.05634600  | 6                 | -2.43781400                     | 2.19383100  | -1.86558900 |
| 1  | -6.77779700 | 1.78491500  | 2.20882100  | 6                 | -3.77043700                     | 1.77838500  | -1.88601500 |
| 1  | -8.35585700 | 1.96935500  | 1.41573000  | 6                 | -1.85143000                     | 2.68499000  | -3.04701800 |
| 6  | -5.03124200 | -1.98168700 | -1.65363700 | 6                 | -4.54016600                     | 1.86929200  | -3.05967400 |
| 1  | -4.43497500 | -1.11167200 | -1.96351000 | 1                 | -4.21583400                     | 1.36298600  | -0.98751500 |
| 1  | -4.36232900 | -2.85644000 | -1.62695200 | 6                 | -2.59205000                     | 2.78998400  | -4.22673700 |
| 1  | -5.77906400 | -2.16498600 | -2.44229300 | 1                 | -0.81179100                     | 3.01926900  | -3.04173200 |
| 6  | -6.44194900 | -3.03963500 | 0.16920200  | 6                 | -3.93752100                     | 2.38609000  | -4.20938500 |
| 1  | -6.82173600 | -2.95353900 | 1.19801700  | 1                 | -4.52590100                     | 2.46194300  | -5.12815300 |
| 1  | -7.29700700 | -3.26655800 | -0.48788700 | 6                 | 2.76810100                      | 5.42208900  | 0.36233100  |
| 1  | -5.76930000 | -3.91168000 | 0.14469600  | 1                 | 3.22767500                      | 6.21989600  | -0.24117800 |
| 6  | -8.69330200 | -0.89872200 | -2.09325400 | 1                 | 2.87563800                      | 5.71589400  | 1.42034000  |
| 1  | -8.19371800 | -1.87265300 | -2.21008000 |                   |                                 |             |             |

|   |              |             |             |    |             |             |             |
|---|--------------|-------------|-------------|----|-------------|-------------|-------------|
| 1 | 3.35386000   | 4.50182000  | 0.21815400  | 1  | 2.56831500  | 3.39862700  | 2.47843800  |
| 6 | -1.75536300  | 7.34823300  | -0.80962600 | 1  | 2.33054500  | 2.15463100  | 3.73873800  |
| 1 | -1.76707400  | 8.02282700  | 0.06187700  | 1  | 2.22389500  | 1.70619300  | 2.01977000  |
| 1 | -1.38769200  | 7.93648100  | -1.66639200 | 6  | 0.18248100  | 3.92144500  | 3.52033200  |
| 1 | -2.79274500  | 7.05350000  | -1.02317100 | 1  | 0.35473600  | 3.75529000  | 4.60574500  |
| 6 | -5.97196100  | 1.40078700  | -3.07694600 | 1  | 0.76709600  | 4.80772400  | 3.22504200  |
| 1 | -6.59895500  | 1.98782800  | -2.38863100 | 1  | -0.87746700 | 4.16304900  | 3.36744600  |
| 1 | -6.40576700  | 1.47873100  | -4.08366600 | 6  | 2.52423000  | -1.49472300 | -1.68804100 |
| 1 | -6.05422400  | 0.35361500  | -2.74689100 | 6  | 3.15902100  | -2.72071200 | -1.85536500 |
| 6 | -1.97247400  | 3.32074900  | -5.49375800 | 1  | 4.03354200  | -2.96294600 | -1.24799600 |
| 1 | -2.01598600  | 2.57060900  | -6.30040000 | 6  | 2.66727500  | -3.64815500 | -2.78508200 |
| 1 | -2.51091200  | 4.21170500  | -5.85515800 | 1  | 3.15996300  | -4.61612000 | -2.90431500 |
| 1 | -0.91943400  | 3.59899700  | -5.34445800 | 6  | 1.54315800  | -3.33382200 | -3.55124100 |
| 6 | -1.79144400  | -5.55519000 | -3.04189500 | 1  | 1.15252900  | -4.05215500 | -4.27527300 |
| 1 | -2.16094900  | -5.85741700 | -4.03233300 | 6  | 0.90417400  | -2.10057800 | -3.38800500 |
| 1 | -0.72051700  | -5.81359100 | -2.98590300 | 1  | 0.02232600  | -1.86207400 | -3.98153100 |
| 1 | -2.30784700  | -6.16425400 | -2.28311300 | 6  | 1.37990000  | -1.17677000 | -2.45171600 |
| 6 | -3.03941300  | -0.93905900 | -4.70345200 | 6  | 0.74073900  | 0.13788600  | -2.23487900 |
| 1 | -4.10713100  | -0.68838900 | -4.58828600 | 6  | 1.53224600  | 1.22857200  | -1.71752500 |
| 1 | -2.49416800  | 0.01533400  | -4.69793300 | 6  | 2.77696200  | 0.92743900  | -1.08099800 |
| 1 | -2.91477400  | -1.40992100 | -5.68939600 | 6  | 2.87402800  | -0.51542600 | -0.58883800 |
| 6 | -1.77005200  | -5.87431700 | 3.32286300  | 1  | 3.87865600  | -0.72257100 | -0.19028200 |
| 1 | -2.83195800  | -5.59652800 | 3.25704500  | 1  | -0.08263700 | 0.37897300  | -2.91085200 |
| 1 | -1.66856800  | -6.91951100 | 2.98960400  | 1  | 3.19181600  | 1.66906900  | -0.39346900 |
| 1 | -1.48234900  | -5.84659200 | 4.38731200  | 1  | 1.30673900  | 2.25553900  | -2.00430700 |
| 6 | 2.74722400   | -4.68414900 | 1.36065300  | 8  | 1.92748500  | -0.61877700 | 0.42766400  |
| 1 | 3.08825900   | -5.51830900 | 1.99076000  | 6  | 5.37039900  | 0.59389200  | -1.77057500 |
| 1 | 2.94496100   | -4.94956800 | 0.30886000  | 6  | 4.32145500  | 1.26618000  | -2.44285000 |
| 1 | 3.36682600   | -3.80227400 | 1.58822100  | 6  | 4.16058500  | 0.51417000  | -3.68596100 |
| 1 | -1.60299500  | -1.20068000 | 3.30589100  | 6  | 4.99567000  | -0.54603200 | -3.64417700 |
| 6 | -0.26788500  | 1.61592500  | 2.66340900  | 8  | 5.72897100  | -0.50556500 | -2.44107600 |
| 1 | 0.05451300   | 1.06545700  | 1.74178000  | 1  | 4.19028200  | 2.34291200  | -2.35556900 |
| 6 | -5.01399900  | -1.15981600 | -0.07379900 | 1  | 3.46043300  | 0.73710100  | -4.48687200 |
| 1 | -4.55553800  | -0.57209000 | -0.88542300 | 8  | 5.90654300  | 0.86851300  | -0.63693900 |
| 7 | -4.87616800  | -2.54426900 | -0.49959500 | 6  | 5.28777600  | -1.68633400 | -4.53993600 |
| 6 | -6.45034100  | -0.64692200 | 0.09782100  | 1  | 5.08251200  | -2.64330700 | -4.03677000 |
| 6 | -6.70040000  | 0.72780200  | 0.22676600  | 1  | 4.65077600  | -1.62444100 | -5.43194100 |
| 6 | -7.54295500  | -1.52076200 | 0.15667700  | 1  | 6.34336400  | -1.68410500 | -4.85785400 |
| 6 | -7.99487600  | 1.21786800  | 0.39942400  | 14 | 7.21432600  | 0.24959000  | 0.38431100  |
| 1 | -5.86445000  | 1.42394600  | 0.21705100  | 6  | 6.72026000  | 0.96481800  | 2.06370000  |
| 6 | -8.84463500  | -1.03639500 | 0.32669200  | 1  | 7.04936700  | 2.02046400  | 2.01581500  |
| 1 | -7.38387600  | -2.59373100 | 0.07239700  | 6  | 8.72255500  | 1.10924900  | -0.36555000 |
| 6 | -9.07768400  | 0.33422200  | 0.44683500  | 1  | 8.35435900  | 2.14006300  | -0.53182700 |
| 1 | -8.15980300  | 2.29358200  | 0.50005400  | 6  | 7.24103200  | -1.63995100 | 0.25008300  |
| 1 | -9.67990200  | -1.73944200 | 0.36691300  | 1  | 7.17206000  | -1.83607900 | -0.83416500 |
| 1 | -10.09367800 | 0.71248300  | 0.57984000  | 6  | 7.47798500  | 0.29191200  | 3.22275300  |
| 6 | -5.33286900  | -2.85312000 | -1.83193800 | 1  | 7.27238900  | 0.81364900  | 4.17162700  |
| 1 | -6.42408100  | -3.04479000 | -1.90863300 | 1  | 7.16275300  | -0.75463800 | 3.35566300  |
| 1 | -5.09262600  | -2.02248500 | -2.51059500 | 1  | 8.56907600  | 0.29440300  | 3.07728500  |
| 1 | -4.80811700  | -3.74626900 | -2.20555800 | 6  | 5.20206300  | 0.96309700  | 2.31055500  |
| 6 | -4.97354900  | -3.63609700 | 0.43920600  | 1  | 4.96970300  | 1.41635600  | 3.28813800  |
| 1 | -4.29301600  | -4.45137900 | 0.13290700  | 1  | 4.66393100  | 1.53498500  | 1.54249600  |
| 1 | -4.67388000  | -3.31087000 | 1.44333200  | 1  | 4.77917900  | -0.05332800 | 2.31727900  |
| 1 | -5.98952100  | -4.07643000 | 0.52608900  | 6  | 9.11752500  | 0.52702100  | -1.73272100 |
| 7 | 0.57392000   | 2.80739100  | 2.68589400  | 1  | 8.27141900  | 0.49198100  | -2.43618900 |
| 6 | 0.02187100   | 0.62771300  | 3.78726800  | 1  | 9.91084600  | 1.13370300  | -2.19941400 |
| 6 | 0.71629000   | -0.55322400 | 3.48336700  | 1  | 9.50732800  | -0.49900000 | -1.63841500 |
| 6 | -0.33397800  | 0.87157300  | 5.12223200  | 6  | 9.92625200  | 1.20084100  | 0.58710500  |
| 6 | 0.98239300   | -1.50317500 | 4.47172300  | 1  | 9.67211500  | 1.71109200  | 1.52866400  |
| 1 | 1.04748500   | -0.73877700 | 2.46010400  | 1  | 10.32810900 | 0.20793300  | 0.84234000  |
| 6 | -0.05924900  | -0.07320500 | 6.11501300  | 1  | 10.74506500 | 1.77046600  | 0.11748500  |
| 1 | -0.82971000  | 1.80156100  | 5.40065400  | 6  | 8.57660100  | -2.22421500 | 0.74893300  |
| 6 | 0.58575400   | -1.27093400 | 5.79114500  | 1  | 9.44136000  | -1.83246400 | 0.19434200  |
| 1 | 1.49131200   | -2.43069600 | 4.19929900  | 1  | 8.74210700  | -2.01656600 | 1.81761800  |
| 1 | -0.35366700  | 0.12724900  | 7.14799400  | 1  | 8.58042700  | -3.32016500 | 0.62869100  |
| 1 | 0.78616100   | -2.01309600 | 6.56733600  | 6  | 6.05674600  | -2.33975200 | 0.93620600  |
| 6 | 1.98684300   | 2.50211300  | 2.74250100  | 1  | 5.08305300  | -1.94382900 | 0.61782400  |

|                                        |             |             |             |   |             |             |             |
|----------------------------------------|-------------|-------------|-------------|---|-------------|-------------|-------------|
| 1                                      | 6.06244600  | -3.41905400 | 0.71042500  | 1 | 1.77002900  | 8.06260100  | 0.60025100  |
| 1                                      | 6.10589100  | -2.23903900 | 2.03124000  | 6 | 6.29897100  | 1.42652700  | 2.30776000  |
| <b>TS0-Si-Cy</b>                       |             |             |             |   |             |             |             |
| E = -5944.81910403    G = -5943.296634 |             |             |             |   |             |             |             |
| 6                                      | 3.51887500  | 2.20337700  | -1.85836100 | 1 | 6.87367600  | 1.89938400  | 1.49634700  |
| 6                                      | 3.85108600  | -1.29623100 | -1.40463500 | 1 | 6.85722300  | 1.56610600  | 3.24402700  |
| 6                                      | 2.40854700  | -1.41663700 | -1.38572400 | 1 | 6.27356600  | 0.35013500  | 2.07864400  |
| 6                                      | 1.97417300  | -1.49345200 | -2.75560600 | 6 | 2.79593100  | 3.97123000  | 4.91259300  |
| 6                                      | 3.10830700  | -1.39697100 | -3.60178200 | 1 | 2.91397400  | 3.34156300  | 5.80957400  |
| 6                                      | 4.25609300  | -1.26650100 | -2.77602900 | 1 | 3.42657500  | 4.86261600  | 5.06119800  |
| 15                                     | 1.11872600  | -1.50051900 | -0.08105200 | 1 | 1.74857100  | 4.30179000  | 4.86457200  |
| 15                                     | 1.39486600  | 2.05063600  | 0.18896400  | 6 | 1.91229700  | -5.19534200 | 3.68222500  |
| 6                                      | 1.86004100  | -2.05985500 | 1.51457000  | 1 | 2.45517100  | -5.41184900 | 4.61349100  |
| 6                                      | 0.22323100  | -3.02363900 | -0.61516800 | 1 | 0.83978800  | -5.37679900 | 3.86652400  |
| 6                                      | -1.05887800 | -3.26730400 | -0.11536000 | 1 | 2.23430800  | -5.92198600 | 2.91988700  |
| 6                                      | -1.74000400 | -4.45440100 | -0.42756400 | 6 | 3.57124300  | -0.49232000 | 4.54748000  |
| 6                                      | -1.11009300 | -5.39686000 | -1.24482400 | 1 | 4.62814000  | -0.34058100 | 4.27138600  |
| 6                                      | 0.18593000  | -5.18669700 | -1.74461700 | 1 | 3.08612000  | 0.49137600  | 4.47666600  |
| 6                                      | 0.84327900  | -3.99722800 | -1.41813900 | 1 | 3.54882000  | -0.82079900 | 5.59678200  |
| 6                                      | 2.45457200  | -1.12509700 | 2.37189700  | 6 | 0.84498800  | -6.22016500 | -2.62271100 |
| 6                                      | 2.91356900  | -1.49913900 | 3.64012500  | 1 | 1.90209500  | -5.97909500 | -2.80580200 |
| 6                                      | 2.73978900  | -2.82812100 | 4.05127700  | 1 | 0.79607900  | -7.22308900 | -2.16959100 |
| 6                                      | 2.13805000  | -3.77880200 | 3.22005700  | 1 | 0.34241400  | -6.28477300 | -3.60247000 |
| 6                                      | 1.70828200  | -3.38290400 | 1.94578400  | 6 | -3.12063200 | -4.68971400 | 0.13081100  |
| 26                                     | 2.90733700  | 0.28068400  | -2.41119700 | 1 | -3.59468100 | -5.57850300 | -0.31002200 |
| 6                                      | 2.17593000  | 1.93051300  | -1.44419000 | 1 | -3.08394400 | -4.83010100 | 1.22362100  |
| 6                                      | 3.58763800  | 2.05164700  | -3.26983500 | 1 | -3.77158400 | -3.82234700 | -0.05542400 |
| 6                                      | 1.39562700  | 1.62967700  | -2.62762300 | 1 | 0.94684800  | -1.59376000 | -3.08362900 |
| 6                                      | 2.28899400  | 1.70861900  | -3.74326600 | 6 | -0.10501400 | 1.42464700  | -2.63676300 |
| 1                                      | -1.54575200 | -2.50967200 | 0.48997200  | 1 | -0.36229200 | 1.06418300  | -1.60344400 |
| 1                                      | 1.85418000  | -3.84196200 | -1.78932100 | 6 | 4.82128000  | -1.42911400 | -0.24868200 |
| 1                                      | 2.54688200  | -0.08756900 | 2.06384600  | 1 | 4.52261500  | -0.71334900 | 0.53434600  |
| 1                                      | 1.23230800  | -4.11969900 | 1.30011700  | 7 | 4.67346700  | -2.73674300 | 0.37129500  |
| 1                                      | 3.08869600  | -1.38551700 | -4.68963800 | 6 | 6.24120800  | -1.04916400 | -0.68741900 |
| 1                                      | 5.28293800  | -1.15640400 | -3.11401300 | 6 | 6.56501300  | 0.28978100  | -0.95144800 |
| 1                                      | 4.48536600  | 2.14974500  | -3.87716900 | 6 | 7.23869500  | -2.01517100 | -0.86985500 |
| 1                                      | 2.03297400  | 1.50142200  | -4.77789600 | 6 | 7.84133900  | 0.65801200  | -1.37765500 |
| 1                                      | 4.34155200  | 2.48753300  | -1.21103600 | 1 | 5.79909200  | 1.05463800  | -0.84117700 |
| 1                                      | -1.63399900 | -6.32400800 | -1.49666700 | 6 | 8.52177200  | -1.65326000 | -1.29407500 |
| 1                                      | 3.07548200  | -3.12622000 | 5.04860800  | 1 | 7.01790300  | -3.06418300 | -0.68248600 |
| 45                                     | -0.21766700 | 0.42919500  | 0.41341700  | 6 | 8.82980400  | -0.31600500 | -1.54908200 |
| 6                                      | 0.68320800  | 3.75500700  | 0.05692500  | 1 | 8.06578300  | 1.70865900  | -1.57817200 |
| 6                                      | -0.68723200 | 3.96930400  | -0.11177700 | 1 | 9.28341900  | -2.42523700 | -1.42628300 |
| 6                                      | 1.55971400  | 4.84934000  | 0.02477100  | 1 | 9.83152400  | -0.03343600 | -1.88028800 |
| 6                                      | -1.20106600 | 5.26313300  | -0.27186400 | 6 | 5.33853200  | -2.91514600 | 1.63815100  |
| 1                                      | -1.36638800 | 3.12172600  | -0.13370500 | 1 | 6.41915400  | -3.15783000 | 1.55562300  |
| 6                                      | 1.07861100  | 6.15239300  | -0.15048500 | 1 | 5.24723900  | -1.99929400 | 2.23981900  |
| 1                                      | 2.63414100  | 4.69205800  | 0.14188800  | 1 | 4.85248700  | -3.72792500 | 2.19978000  |
| 6                                      | -0.30518400 | 6.33889100  | -0.28808400 | 6 | 4.54316500  | -3.93947500 | -0.41604600 |
| 1                                      | -0.69367500 | 7.35444500  | -0.41330800 | 1 | 3.86482400  | -4.64735800 | 0.09438000  |
| 6                                      | 2.68355600  | 2.32057400  | 1.46174100  | 1 | 4.11039500  | -3.71405200 | -1.39858600 |
| 6                                      | 3.97878200  | 1.80668600  | 1.37159200  | 1 | 5.49927800  | -4.47613100 | -0.59267900 |
| 6                                      | 2.29713600  | 3.01507300  | 2.62276800  | 7 | -0.80896300 | 2.69287400  | -2.77469500 |
| 6                                      | 4.90881100  | 1.99874400  | 2.40812500  | 6 | -0.62604200 | 0.31581300  | -3.54376400 |
| 1                                      | 4.26622200  | 1.23185800  | 0.49643300  | 6 | -1.31828700 | -0.76261800 | -2.97362700 |
| 6                                      | 3.20030700  | 3.22302400  | 3.66860800  | 6 | -0.47285100 | 0.35479000  | -4.93777600 |
| 1                                      | 1.28842800  | 3.42572900  | 2.70302700  | 6 | -1.78328000 | -1.81466700 | -3.76657400 |
| 6                                      | 4.50392700  | 2.71635300  | 3.53690400  | 1 | -1.49728300 | -0.78944900 | -1.89684900 |
| 1                                      | 5.21777000  | 2.87166700  | 4.35075600  | 6 | -0.94668200 | -0.69137000 | -5.73390000 |
| 6                                      | -2.68429600 | 5.49655100  | -0.42411800 | 1 | 0.01706500  | 1.20472800  | -5.41420300 |
| 1                                      | -3.06634200 | 6.16801800  | 0.36212100  | 6 | -1.59076800 | -1.78730800 | -5.14986200 |
| 1                                      | -2.91931400 | 5.97188700  | -1.39039900 | 1 | -2.28789900 | -2.65955500 | -3.29196900 |
| 1                                      | -3.25099000 | 4.55587400  | -0.37087200 | 1 | -0.81079700 | -0.65112600 | -6.81729300 |
| 6                                      | 2.01706600  | 7.33185400  | -0.18697000 | 1 | -1.94884200 | -2.60908900 | -5.77422300 |
| 1                                      | 3.06209800  | 7.02168900  | -0.04473900 | 6 | -2.24578100 | 2.56666300  | -2.73930800 |
| 1                                      | 1.94981200  | 7.86269700  | -1.15067400 | 1 | -2.69795000 | 3.55196600  | -2.55055300 |
|                                        |             |             |             | 1 | -2.68301200 | 2.16660000  | -3.67714800 |
|                                        |             |             |             | 1 | -2.54197200 | 1.88734600  | -1.92420700 |
|                                        |             |             |             | 6 | -0.32222000 | 3.70203400  | -3.68759900 |

|    |              |             |             |                                    |                |                  |             |
|----|--------------|-------------|-------------|------------------------------------|----------------|------------------|-------------|
| 1  | -0.50650000  | 3.47438500  | -4.76004800 | <b>TS0-Re-C<math>\gamma</math></b> |                |                  |             |
| 1  | -0.83072200  | 4.65285800  | -3.46097000 | E =                                | -5944.81900091 | G = -5943.296731 |             |
| 1  | 0.75334100   | 3.86734300  | -3.54700100 | 6                                  | 3.50816000     | 2.19339600       | -1.92495000 |
| 6  | -2.36068300  | -1.04465600 | 2.49057400  | 6                                  | 3.95047500     | -1.27100000      | -1.28229300 |
| 6  | -3.00763700  | -2.19690400 | 2.92843400  | 6                                  | 2.51237700     | -1.44603500      | -1.30297300 |
| 1  | -3.96541900  | -2.47681400 | 2.48641400  | 6                                  | 2.12942200     | -1.60598400      | -2.68057700 |
| 6  | -2.42259200  | -3.00433800 | 3.91201400  | 6                                  | 3.28596000     | -1.50347500      | -3.49450800 |
| 1  | -2.92985000  | -3.91261000 | 4.24548000  | 6                                  | 4.39936300     | -1.29052100      | -2.64028200 |
| 6  | -1.18684300  | -2.64867500 | 4.45960000  | 15                                 | 1.17724200     | -1.50507400      | -0.03912800 |
| 1  | -0.72366100  | -3.27564200 | 5.22452600  | 15                                 | 1.36356700     | 2.06081800       | 0.09551700  |
| 6  | -0.53480700  | -1.49164000 | 4.02671100  | 6                                  | 1.88293600     | -1.98744500      | 1.59642500  |
| 1  | 0.43084200   | -1.21884100 | 4.45062600  | 6                                  | 0.32524000     | -3.06114900      | -0.54891200 |
| 6  | -1.10908000  | -0.68607800 | 3.03548600  | 6                                  | -0.99606300    | -3.26941900      | -0.14730500 |
| 6  | -0.46322800  | 0.54120700  | 2.53440700  | 6                                  | -1.67260400    | -4.45498600      | -0.47520800 |
| 6  | -1.28627400  | 1.58750600  | 1.98106100  | 6                                  | -0.99236600    | -5.43738900      | -1.19909900 |
| 6  | -2.58843800  | 1.26360300  | 1.50969300  | 6                                  | 0.34667500     | -5.26601400      | -1.59206800 |
| 6  | -2.82769300  | -0.22916800 | 1.30401200  | 6                                  | 0.99485500     | -4.07336300      | -1.25943400 |
| 1  | -3.88785700  | -0.44396800 | 1.09923900  | 6                                  | 2.44659900     | -1.01059400      | 2.42750400  |
| 1  | 0.46189200   | 0.83023700  | 3.03760800  | 6                                  | 2.88008000     | -1.32695800      | 3.72001800  |
| 1  | -3.01979300  | 1.90667100  | 0.73954000  | 6                                  | 2.71192600     | -2.64017500      | 4.18167100  |
| 1  | -0.97229800  | 2.62821900  | 2.04381200  | 6                                  | 2.13866200     | -3.63110600      | 3.37785800  |
| 8  | -2.04998700  | -0.55127600 | 0.19002000  | 6                                  | 1.73368400     | -3.29276600      | 2.07887500  |
| 6  | -5.89781900  | 0.77580800  | 2.12303500  | 26                                 | 2.98392400     | 0.22120100       | -2.39262300 |
| 6  | -5.45129900  | 0.22429800  | 3.32759100  | 6                                  | 2.16934800     | 1.88676600       | -1.52124100 |
| 6  | -4.36181900  | 1.00412900  | 3.72651300  | 6                                  | 3.61141700     | 1.97638300       | -3.32529700 |
| 6  | -4.15103100  | 2.01022600  | 2.75932600  | 6                                  | 1.42438900     | 1.49670200       | -2.70332800 |
| 8  | -5.18376600  | 1.87249700  | 1.81686500  | 6                                  | 2.33697000     | 1.55939900       | -3.80463500 |
| 1  | -5.84495000  | -0.67261700 | 3.79529900  | 1                                  | -1.52138900    | -2.47872000      | 0.37919500  |
| 1  | -3.74077700  | 0.85925300  | 4.60858900  | 1                                  | 2.03436000     | -3.94266400      | -1.55493200 |
| 8  | -6.79778100  | 0.37416000  | 1.28694600  | 1                                  | 2.53596000     | 0.01454000       | 2.07851900  |
| 6  | -3.68530300  | 3.41315500  | 2.98742700  | 1                                  | 1.27718400     | -4.05961700      | 1.45417400  |
| 1  | -4.48322200  | 4.02175700  | 3.44265100  | 1                                  | 3.30223600     | -1.54455800      | -4.58170900 |
| 1  | -2.82449500  | 3.40406100  | 3.67004400  | 1                                  | 5.43229900     | -1.15913100      | -2.95071100 |
| 1  | -3.37785000  | 3.89461200  | 2.0479810   | 1                                  | 4.51608600     | 2.08186000       | -3.92095700 |
| 14 | -6.71661600  | -0.27727200 | -0.35097500 | 1                                  | 2.11332400     | 1.28866600       | -4.83179400 |
| 6  | -6.08680600  | -2.05947000 | -0.16282300 | 1                                  | 4.30541000     | 2.54265300       | -1.27732400 |
| 1  | -4.98467500  | -1.95503100 | -0.15707200 | 1                                  | -1.50974700    | -6.36470200      | -1.46367800 |
| 6  | -5.46755400  | 0.77104900  | -1.31138700 | 1                                  | 3.02874900     | -2.89308000      | 5.19747400  |
| 1  | -4.56620000  | 0.79091800  | -0.6738620  | 45                                 | -0.21554300    | 0.41772100       | 0.35120700  |
| 6  | -8.51224100  | -0.05151300 | -0.87756600 | 6                                  | 0.62423800     | 3.74589500       | -0.11017600 |
| 1  | -8.70080900  | 1.01684300  | -0.65953900 | 6                                  | -0.74646300    | 3.92629500       | -0.30746400 |
| 6  | -6.46488400  | -2.93645100 | -1.37062800 | 6                                  | 1.47980100     | 4.85631600       | -0.16206500 |
| 1  | -5.97101900  | -3.91970900 | -1.30033900 | 6                                  | -1.28223900    | 5.20357200       | -0.52184800 |
| 1  | -7.54992800  | -3.12070600 | -1.40359100 | 1                                  | -1.40815000    | 3.06504600       | -0.30675600 |
| 1  | -6.17272700  | -2.49025500 | -2.33220300 | 6                                  | 0.97624100     | 6.14290400       | -0.38615200 |
| 6  | -6.50749300  | -2.74037700 | 1.14805600  | 1                                  | 2.55460200     | 4.72466200       | -0.01916100 |
| 1  | -6.04978200  | -3.74063000 | 1.22709700  | 6                                  | -0.40863000    | 6.29664800       | -0.55530500 |
| 1  | -6.20581100  | -2.16486300 | 2.03343100  | 1                                  | -0.81482300    | 7.29973700       | -0.71868700 |
| 1  | -7.59851700  | -2.87434000 | 1.20222400  | 6                                  | 2.62058800     | 2.40428200       | 1.38259300  |
| 6  | -5.94219300  | 2.21800600  | -1.51003800 | 6                                  | 3.93611200     | 1.93972200       | 1.33311600  |
| 1  | -6.19905000  | 2.69999800  | -0.55464700 | 6                                  | 2.18151100     | 3.10998400       | 2.51829900  |
| 1  | -5.15489200  | 2.82445200  | -1.98826800 | 6                                  | 4.83361900     | 2.19059100       | 2.38636400  |
| 1  | -6.82834400  | 2.26871800  | -2.16288600 | 1                                  | 4.26674800     | 1.36044800       | 0.47666100  |
| 6  | -5.05225200  | 0.10551700  | -2.63619000 | 6                                  | 3.05086400     | 3.37597100       | 3.57899000  |
| 1  | -4.55311400  | -0.86006900 | -2.47186900 | 1                                  | 1.15652400     | 3.48372400       | 2.56611600  |
| 1  | -5.90956100  | -0.06119800 | -3.30691300 | 6                                  | 4.37540800     | 2.91641200       | 3.48890000  |
| 1  | -4.33547900  | 0.73957800  | -3.17855200 | 1                                  | 5.06360500     | 3.11720400       | 4.31478500  |
| 6  | -8.75595000  | -0.27213900 | -2.37946300 | 6                                  | -2.76452800    | 5.39124700       | -0.73459800 |
| 1  | -8.13959900  | 0.39100900  | -3.00486100 | 1                                  | -3.14138100    | 6.27412100       | -0.19500600 |
| 1  | -8.54300900  | -1.30888800 | -2.68283400 | 1                                  | -2.99780700    | 5.54442400       | -1.80193700 |
| 1  | -9.81060600  | -0.07135800 | -2.63029700 | 1                                  | -3.33433000    | 4.51249700       | -0.39761300 |
| 6  | -9.48035500  | -0.87963800 | -0.01676300 | 6                                  | 1.89052600     | 7.34070000       | -0.43682800 |
| 1  | -9.31974400  | -0.71376000 | 1.05934700  | 1                                  | 2.94194200     | 7.05300100       | -0.29438100 |
| 1  | -10.52599100 | -0.61414300 | -0.24379000 | 1                                  | 1.80983800     | 7.86153700       | -1.40480600 |
| 1  | -9.37114600  | -1.95842500 | -0.21307500 | 1                                  | 1.63122900     | 8.07332400       | 0.34493200  |
|    |              |             |             | 6                                  | 6.24659500     | 1.67067900       | 2.33165400  |
|    |              |             |             | 1                                  | 6.81414300     | 2.12608200       | 1.50559000  |

|   |             |             |             |                                     |                |             |              |
|---|-------------|-------------|-------------|-------------------------------------|----------------|-------------|--------------|
| 1 | 6.78457700  | 1.87661000  | 3.26752800  | 6                                   | -2.37723100    | -1.05008800 | 2.41654300   |
| 1 | 6.26685200  | 0.58437200  | 2.15444300  | 6                                   | -3.03375900    | -2.17407500 | 2.90845700   |
| 6 | 2.58917500  | 4.13508400  | 4.79611600  | 1                                   | -3.99328800    | -2.47002900 | 2.47952300   |
| 1 | 2.70216500  | 3.52696900  | 5.70856900  | 6                                   | -2.46159700    | -2.92748100 | 3.94322400   |
| 1 | 3.18710000  | 5.04887700  | 4.94365700  | 1                                   | -2.97494900    | -3.81455700 | 4.32106500   |
| 1 | 1.53354500  | 4.43072200  | 4.71336500  | 6                                   | -1.23341900    | -2.54221500 | 4.48499900   |
| 6 | 1.91543900  | -5.02912000 | 3.89425100  | 1                                   | -0.78046900    | -3.12595400 | 5.28930100   |
| 1 | 2.44332800  | -5.20247200 | 4.84301700  | 6                                   | -0.57748100    | -1.40549700 | 4.00303900   |
| 1 | 0.84115400  | -5.21127300 | 4.06735000  | 1                                   | 0.37648000     | -1.10382300 | 4.43343600   |
| 1 | 2.25611600  | -5.78401400 | 3.16840200  | 6                                   | -1.13856700    | -0.65363400 | 2.96572400   |
| 6 | 3.50569000  | -0.27584100 | 4.59926600  | 6                                   | -0.51220300    | 0.57858500  | 2.44554000   |
| 1 | 4.55871400  | -0.10179300 | 4.32173700  | 6                                   | -1.34932100    | 1.59582200  | 1.85279300   |
| 1 | 2.99308500  | 0.69116200  | 4.49741000  | 6                                   | -2.65886800    | 1.24264300  | 1.40600900   |
| 1 | 3.48800600  | -0.57329500 | 5.65778800  | 6                                   | -2.84511500    | -0.27019400 | 1.20906600   |
| 6 | 1.05987500  | -6.34742000 | -2.36381200 | 1                                   | -3.89168900    | -0.51073600 | 0.98724500   |
| 1 | 1.02751300  | -7.31001900 | -1.82828700 | 1                                   | 0.39283900     | 0.90251100  | 2.96425500   |
| 1 | 0.58700800  | -6.51057000 | -3.34652100 | 1                                   | -3.10947000    | 1.84556100  | 0.61499800   |
| 1 | 2.11462200  | -6.09025600 | -2.53791900 | 1                                   | -1.05825400    | 2.64431100  | 1.90832000   |
| 6 | -3.10609600 | -4.63393500 | -0.04093400 | 8                                   | -2.03718500    | -0.57194900 | 0.11515700   |
| 1 | -3.54546100 | -5.55695900 | -0.44572600 | 6                                   | -5.94269700    | 1.69508600  | 1.47008200   |
| 1 | -3.18116900 | -4.67280700 | 1.05807900  | 6                                   | -5.51871800    | 3.03478800  | 1.45406000   |
| 1 | -3.72660900 | -3.78522600 | -0.37127700 | 6                                   | -4.43275100    | 3.10087400  | 2.32525900   |
| 1 | 1.11916100  | -1.76348200 | -3.03697500 | 6                                   | -4.15234100    | 1.79641600  | 2.80540000   |
| 6 | -0.06008600 | 1.19477200  | -2.72306700 | 8                                   | -5.18958700    | 0.98071700  | 2.31412700   |
| 1 | -0.29698800 | 0.82770400  | -1.69056300 | 1                                   | -5.96138300    | 3.82255300  | 0.85097800   |
| 6 | 4.89097400  | -1.32055900 | -0.09504500 | 1                                   | -3.83237200    | 3.97920100  | 2.55972000   |
| 1 | 4.55008800  | -0.58011800 | 0.64644700  | 8                                   | -6.87438900    | 1.10158100  | 0.80447500   |
| 7 | 4.76533000  | -2.60343700 | 0.57936700  | 6                                   | -3.63340600    | 1.42798000  | 4.15930200   |
| 6 | 6.31109500  | -0.91730600 | -0.51347900 | 1                                   | -3.47480500    | 0.34650200  | 4.23890200   |
| 6 | 6.59677800  | 0.41183800  | -0.85965700 | 1                                   | -2.66962800    | 1.92918800  | 4.32816800   |
| 6 | 7.34832100  | -1.85467600 | -0.59492600 | 1                                   | -4.33557200    | 1.74380600  | 4.94739700   |
| 6 | 7.87420300  | 0.79837200  | -1.26561200 | 14                                  | -6.81925300    | -0.28172900 | -0.30041400  |
| 1 | 5.80005800  | 1.15234500  | -0.83294800 | 6                                   | -6.41792000    | -1.84657100 | 0.69144500   |
| 6 | 8.63281200  | -1.47402400 | -0.99817000 | 1                                   | -5.31656300    | -1.84696000 | 0.76883500   |
| 1 | 7.15777800  | -2.89640800 | -0.34495400 | 6                                   | -5.42629000    | 0.20592100  | -1.48841900  |
| 6 | 8.90275000  | -0.14648200 | -1.33373700 | 1                                   | -4.61552700    | 0.56790700  | -0.82961900  |
| 1 | 8.06805300  | 1.84048400  | -1.53183200 | 6                                   | -8.54832800    | -0.17770200 | -1.04138600  |
| 1 | 9.42544200  | -2.22403000 | -1.05074600 | 1                                   | -8.62284000    | 0.88162000  | -1.35055800  |
| 1 | 9.90547000  | 0.15083100  | -1.64861100 | 6                                   | -6.81628100    | -3.11708800 | -0.08207000  |
| 6 | 5.39477400  | -2.70676300 | 1.87265200  | 1                                   | -6.43447600    | -4.01358900 | 0.43361200   |
| 1 | 6.48093700  | -2.93533300 | 1.83447300  | 1                                   | -7.91042700    | -3.22151700 | -0.14600200  |
| 1 | 5.27271100  | -1.76350700 | 2.42399100  | 1                                   | -6.41739200    | -3.13500200 | -1.10757300  |
| 1 | 4.90462600  | -3.49811600 | 2.46071600  | 6                                   | -6.98830500    | -1.86460100 | 2.11784200   |
| 6 | 4.69483800  | -3.84329300 | -0.15619400 | 1                                   | -6.68564000    | -2.78929900 | 2.63816000   |
| 1 | 4.02473200  | -4.54927100 | 0.36767100  | 1                                   | -6.63237100    | -1.01486900 | 2.71578400   |
| 1 | 4.28407900  | -3.67592500 | -1.15960800 | 1                                   | -8.08881100    | -1.84054100 | 2.11555700   |
| 1 | 5.67194900  | -4.35598300 | -0.28245900 | 6                                   | -5.84607700    | 1.37514800  | -2.39319800  |
| 7 | -0.85509700 | 2.40929800  | -2.86717300 | 1                                   | -6.21254900    | 2.23655900  | -1.81200300  |
| 6 | -0.50465000 | 0.04615700  | -3.62083600 | 1                                   | -4.99842200    | 1.72061500  | -3.00496300  |
| 6 | -1.17133500 | -1.04361600 | -3.04167800 | 1                                   | -6.64734600    | 1.08236100  | -3.08963300  |
| 6 | -0.31290900 | 0.05318400  | -5.01071700 | 6                                   | -4.84282000    | -0.96946000 | -2.28721500  |
| 6 | -1.56987500 | -2.13557600 | -3.81590600 | 1                                   | -4.41404400    | -1.73793700 | -1.62698700  |
| 1 | -1.37731200 | -1.04562700 | -1.97016400 | 1                                   | -5.59760400    | -1.44927100 | -2.93104900  |
| 6 | -0.72081100 | -1.03332500 | -5.78951800 | 1                                   | -4.02550100    | -0.62442000 | -2.93881700  |
| 1 | 0.15737900  | 0.90729000  | -5.49844900 | 6                                   | -8.73032300    | -1.04510000 | -2.29849800  |
| 6 | -1.33662200 | -2.13860600 | -5.19320900 | 1                                   | -7.97427800    | -0.83207900 | -3.06972500  |
| 1 | -2.05462900 | -2.98608900 | -3.33128000 | 1                                   | -8.67315700    | -2.11928300 | -2.06642800  |
| 1 | -0.55427400 | -1.01716200 | -6.86925100 | 1                                   | -9.71942600    | -0.86368300 | -2.75038500  |
| 1 | -1.64139600 | -2.99185500 | -5.80344400 | 6                                   | -9.65238500    | -0.43884600 | -0.00439200  |
| 6 | -2.27654000 | 2.17423600  | -2.75533700 | 1                                   | -9.53253700    | 0.18825000  | 0.89245900   |
| 1 | -2.79772600 | 3.12970400  | -2.59225500 | 1                                   | -10.64575000   | -0.22419500 | -0.43175200  |
| 1 | -2.71982400 | 1.69299300  | -3.65183500 | 1                                   | -9.66019900    | -1.49202900 | 0.31893600   |
| 1 | -2.48002400 | 1.51571700  | -1.89606000 |                                     |                |             |              |
| 6 | -0.49925900 | 3.36887800  | -3.88846100 |                                     |                |             |              |
| 1 | -0.77341900 | 3.05567200  | -4.91908800 |                                     |                |             |              |
| 1 | -1.02288000 | 4.31616100  | -3.68109700 |                                     |                |             |              |
| 1 | 0.57785000  | 3.57818400  | -3.86186200 |                                     |                |             |              |
|   |             |             |             | <b>TS0'-Si-C<math>\alpha</math></b> |                |             |              |
|   |             |             |             | E =                                 | -5300.01076115 | G =         | -5298.747321 |
|   |             |             |             | 6                                   | 1.24289500     | -3.17034500 | 1.72294700   |
|   |             |             |             | 6                                   | 3.43418700     | -0.59215000 | 0.60856100   |

|    |             |             |             |   |             |             |             |
|----|-------------|-------------|-------------|---|-------------|-------------|-------------|
| 6  | 2.42716300  | 0.38153300  | 0.95997200  | 1 | -2.31257300 | -4.75542200 | -4.67307500 |
| 6  | 2.57636900  | 0.66709600  | 2.36003100  | 1 | -3.25412900 | -3.44024600 | -3.92919100 |
| 6  | 3.62421600  | -0.13487100 | 2.87918300  | 6 | 2.49330900  | 4.00753300  | -4.31854700 |
| 6  | 4.14323500  | -0.91304000 | 1.81033900  | 1 | 2.68960500  | 3.91974000  | -5.39673500 |
| 15 | 1.10838200  | 1.30304200  | 0.06629800  | 1 | 1.71394100  | 4.77491100  | -4.17610500 |
| 15 | -0.83323500 | -1.66865100 | 0.28510500  | 1 | 3.40734200  | 4.38467500  | -3.83312000 |
| 6  | 1.47002300  | 1.38291900  | -1.74830500 | 6 | 1.00687000  | -0.79995600 | -4.85259000 |
| 6  | 1.57691800  | 3.00369600  | 0.58903900  | 1 | 1.78424800  | -1.57708600 | -4.77506600 |
| 6  | 0.60082600  | 3.98763200  | 0.74502600  | 1 | 0.06113100  | -1.27755800 | -4.55939200 |
| 6  | 0.96545800  | 5.30494800  | 1.07534000  | 1 | 0.93785600  | -0.50281000 | -5.90898000 |
| 6  | 2.31962200  | 5.60789600  | 1.23486100  | 6 | 4.77546200  | 4.99362100  | 1.24280700  |
| 6  | 3.32177700  | 4.63397500  | 1.06733600  | 1 | 5.43238000  | 4.15381800  | 0.97355900  |
| 6  | 2.93697200  | 3.33221600  | 0.74179700  | 1 | 5.05313600  | 5.85929100  | 0.62015200  |
| 6  | 1.16164600  | 0.29633000  | -2.58029400 | 1 | 4.99226000  | 5.26768000  | 2.28883100  |
| 6  | 1.32323100  | 0.37868800  | -3.96918400 | 6 | -0.10744600 | 6.35042500  | 1.24869000  |
| 6  | 1.77236300  | 1.58632200  | -4.52299700 | 1 | 0.31632200  | 7.33876700  | 1.47763800  |
| 6  | 2.05879400  | 2.69472500  | -3.72085600 | 1 | -0.71673100 | 6.44250100  | 0.33455500  |
| 6  | 1.90970800  | 2.57716800  | -2.33152800 | 1 | -0.79738200 | 6.07784800  | 2.06451300  |
| 26 | 2.11439600  | -1.30210000 | 2.08459900  | 1 | 1.97259600  | 1.36473500  | 2.92784900  |
| 6  | 0.28941400  | -2.10597300 | 1.63635000  | 6 | -0.70204200 | -0.30636000 | 3.26694500  |
| 6  | 1.81879900  | -3.14382600 | 3.02150500  | 1 | -0.91852500 | 0.20409400  | 2.29436800  |
| 6  | 0.25573500  | -1.42681200 | 2.91704100  | 6 | 3.92882800  | -0.91137800 | -0.78995400 |
| 6  | 1.21234400  | -2.08410700 | 3.75480000  | 1 | 3.05299300  | -0.96895700 | -1.45395400 |
| 1  | -0.45023200 | 3.71881800  | 0.62975100  | 7 | 4.67431700  | 0.26533300  | -1.24301800 |
| 1  | 3.70180900  | 2.56995700  | 0.58383900  | 6 | 4.66391800  | -2.25530700 | -0.90408500 |
| 1  | 0.77393700  | -0.62350600 | -2.15191500 | 6 | 4.33670100  | -3.35568700 | -0.09649400 |
| 1  | 2.12887500  | 3.44291700  | -1.70901000 | 6 | 5.65236600  | -2.43977400 | -1.88344000 |
| 1  | 3.94424300  | -0.16811800 | 3.91867300  | 6 | 4.96687900  | -4.59202200 | -0.25953700 |
| 1  | 4.95648900  | -1.63089400 | 1.88165600  | 1 | 3.58243500  | -3.24021200 | 0.67646700  |
| 1  | 2.60646700  | -3.80187200 | 3.38383100  | 6 | 6.28258000  | -3.67505300 | -2.05418600 |
| 1  | 1.47212500  | -1.79836400 | 4.76908300  | 1 | 5.93781600  | -1.61240900 | -2.52886000 |
| 1  | 1.48540200  | -3.87449900 | 0.93349900  | 6 | 5.94313000  | -4.76054700 | -1.24344400 |
| 1  | 2.61211100  | 6.63051200  | 1.49230600  | 1 | 4.69159200  | -5.42736400 | 0.38930000  |
| 1  | 1.88668900  | 1.66636100  | -5.60770200 | 1 | 7.04827900  | -3.78616200 | -2.82552700 |
| 45 | -1.18268300 | 0.59659500  | 0.24120500  | 1 | 6.43878500  | -5.72507100 | -1.37372400 |
| 6  | -2.32366700 | -2.64505800 | 0.80176600  | 6 | 4.68777800  | 0.59301800  | -2.65091300 |
| 6  | -3.43901600 | -2.03352400 | 1.38133500  | 1 | 5.56234800  | 0.18913300  | -3.20407800 |
| 6  | -2.27808300 | -4.04337600 | 0.70489200  | 1 | 3.78061100  | 0.21773300  | -3.13717500 |
| 6  | -4.51888300 | -2.79945400 | 1.84348600  | 1 | 4.70562700  | 1.68793000  | -2.78412600 |
| 1  | -3.46060900 | -0.95268500 | 1.49130500  | 6 | 5.89710500  | 0.60856500  | -0.55236700 |
| 6  | -3.34011900 | -4.83440100 | 1.15911700  | 1 | 6.15901500  | 1.65481400  | -0.78211600 |
| 1  | -1.40676600 | -4.53139000 | 0.26316900  | 1 | 5.76773500  | 0.53326200  | 0.53586300  |
| 6  | -4.45512500 | -4.19271200 | 1.71806300  | 1 | 6.76804500  | -0.02056900 | -0.83498800 |
| 1  | -5.29442300 | -4.79949600 | 2.07218300  | 7 | -1.99782700 | -0.82472200 | 3.70121300  |
| 6  | -0.36001500 | -2.58539500 | -1.23098600 | 6 | -0.15143000 | 0.80926300  | 4.14631700  |
| 6  | 0.93901400  | -2.99314500 | -1.54899500 | 6 | -0.20179200 | 2.12681800  | 3.66734800  |
| 6  | -1.39995400 | -2.81334100 | -2.15228100 | 6 | 0.35531400  | 0.58387800  | 5.43504900  |
| 6  | 1.20520800  | -3.66189300 | -2.75892600 | 6 | 0.30417500  | 3.18579800  | 4.42351900  |
| 1  | 1.76135900  | -2.78740200 | -0.86700900 | 1 | -0.63303600 | 2.32577200  | 2.68477200  |
| 6  | -1.16248100 | -3.47114000 | -3.36049400 | 6 | 0.85357200  | 1.64356200  | 6.19815600  |
| 1  | -2.41895000 | -2.50506500 | -1.90892500 | 1 | 0.36476200  | -0.42086000 | 5.85737500  |
| 6  | 0.14455700  | -3.90217800 | -3.63723300 | 6 | 0.84311000  | 2.94607400  | 5.68999700  |
| 1  | 0.34404300  | -4.42453300 | -4.57709900 | 1 | 0.28351700  | 4.19742800  | 4.01230300  |
| 6  | -5.71023300 | -2.14428000 | 2.49989700  | 1 | 1.25386600  | 1.44940100  | 7.19609500  |
| 1  | -6.65920700 | -2.59847600 | 2.16969400  | 1 | 1.24425900  | 3.77015300  | 6.28426900  |
| 1  | -5.67410100 | -2.26502700 | 3.59567300  | 6 | -2.99198900 | 0.21303100  | 3.87760500  |
| 1  | -5.74648200 | -1.06436500 | 2.29727100  | 1 | -3.98918600 | -0.24597600 | 3.95878100  |
| 6  | -3.28646100 | -6.33820700 | 1.06570900  | 1 | -2.83121800 | 0.83860300  | 4.77927200  |
| 1  | -3.17631800 | -6.79160400 | 2.06508200  | 1 | -2.98600900 | 0.88626900  | 3.00511800  |
| 1  | -4.21066800 | -6.74678300 | 0.62737500  | 6 | -2.02321900 | -1.83061500 | 4.74088000  |
| 1  | -2.43920100 | -6.67495400 | 0.45134800  | 1 | -1.80894700 | -1.43537000 | 5.75691700  |
| 6  | 2.60734700  | -4.07709500 | -3.11579900 | 1 | -3.02631700 | -2.28622300 | 4.76924500  |
| 1  | 3.08762700  | -4.63901500 | -2.30258700 | 1 | -1.30572400 | -2.63131100 | 4.51845500  |
| 1  | 2.62241700  | -4.69524000 | -4.02427600 | 6 | -2.52996400 | 3.13971300  | -1.44549400 |
| 1  | 3.24511200  | -3.19650500 | -3.29357700 | 6 | -2.51482100 | 4.44368600  | -1.93044000 |
| 6  | -2.27329600 | -3.70252200 | -4.35268700 | 1 | -2.93570700 | 5.25058400  | -1.32415200 |
| 1  | -2.12285700 | -3.09666200 | -5.26234400 | 6 | -1.95644000 | 4.72258600  | -3.18646000 |

|    |             |             |             |    |             |             |             |
|----|-------------|-------------|-------------|----|-------------|-------------|-------------|
| 1  | -1.93821700 | 5.74853900  | -3.56093200 | 45 | 1.21566300  | 0.07281500  | 0.02508100  |
| 6  | -1.42052100 | 3.68507500  | -3.95294000 | 6  | 1.02116700  | 3.53958600  | 0.04639200  |
| 1  | -0.98246600 | 3.89503200  | -4.93116500 | 6  | 2.33429500  | 3.48388200  | 0.51878300  |
| 6  | -1.43284600 | 2.37381000  | -3.46759600 | 6  | 0.42161400  | 4.78788900  | -0.17805500 |
| 1  | -1.01160800 | 1.56711200  | -4.06646800 | 6  | 3.06976100  | 4.65626300  | 0.74187700  |
| 6  | -1.97572500 | 2.08950200  | -2.21065400 | 1  | 2.78908100  | 2.52095300  | 0.73155200  |
| 6  | -2.04853700 | 0.71632900  | -1.67402900 | 6  | 1.12707000  | 5.97586300  | 0.04521100  |
| 6  | -3.10133700 | 0.37627800  | -0.74575200 | 1  | -0.60765700 | 4.84278400  | -0.53896300 |
| 6  | -3.84967300 | 1.45120400  | -0.13475200 | 6  | 2.45259900  | 5.88859400  | 0.49767600  |
| 6  | -3.03401800 | 2.76187900  | -0.07072500 | 1  | 3.01783200  | 6.81071100  | 0.66495000  |
| 1  | -3.64716700 | 3.57796600  | 0.35655500  | 6  | -0.89921200 | 2.44220900  | -1.71203200 |
| 1  | -1.68021400 | -0.06516400 | -2.34259000 | 6  | -2.27351200 | 2.27783500  | -1.89371200 |
| 1  | -4.35065300 | 1.21398000  | 0.81015100  | 6  | -0.11214200 | 2.89860500  | -2.78613000 |
| 1  | -3.51024900 | -0.63372400 | -0.73981500 | 6  | -2.88393800 | 2.58646600  | -3.12298800 |
| 8  | -1.96525000 | 2.46167400  | 0.75994000  | 1  | -2.87989400 | 1.89198900  | -1.08051100 |
| 6  | -6.03667000 | 0.60756400  | -1.00547900 | 6  | -0.69096700 | 3.21693100  | -4.01666100 |
| 6  | -5.45943400 | 1.89088500  | -1.15909500 | 1  | 0.96273300  | 3.03904500  | -2.65387700 |
| 6  | -5.08804400 | 1.91890300  | -2.57862000 | 6  | -2.07998300 | 3.06329100  | -4.16131100 |
| 6  | -5.23226400 | 0.67130300  | -3.06683600 | 1  | -2.54338300 | 3.30812100  | -5.12115800 |
| 8  | -5.82807500 | -0.14519200 | -2.05992500 | 6  | 4.48619400  | 4.59284100  | 1.25801700  |
| 1  | -5.80403900 | 2.75242600  | -0.58797400 | 1  | 5.13709900  | 5.31607300  | 0.74276400  |
| 1  | -4.66572000 | 2.76440200  | -3.11195800 | 1  | 4.52871600  | 4.83162900  | 2.33421300  |
| 8  | -6.58129500 | 0.08569700  | 0.06011300  | 1  | 4.91889600  | 3.58934700  | 1.12975800  |
| 6  | -4.90804000 | -0.01061000 | -4.33809600 | 6  | 0.48875000  | 7.31977200  | -0.19871400 |
| 1  | -5.80361700 | -0.44939200 | -4.80653500 | 1  | 0.47255900  | 7.92471700  | 0.72248600  |
| 1  | -4.46538900 | 0.71645900  | -5.03164700 | 1  | 1.04970900  | 7.89653400  | -0.95213400 |
| 1  | -4.17782600 | -0.82031900 | -4.17467700 | 1  | -0.54659600 | 7.21716300  | -0.55378000 |
| 1  | -6.72997700 | -0.87047000 | -0.04850100 | 6  | -4.36447900 | 2.38631000  | -3.31648100 |
|    |             |             |             | 1  | -4.95171600 | 3.00461000  | -2.62081600 |
|    |             |             |             | 1  | -4.67136900 | 2.63876100  | -4.34104100 |
|    |             |             |             | 1  | -4.65592100 | 1.34321500  | -3.11743900 |
|    |             |             |             | 6  | 0.14481700  | 3.70964300  | -5.16962700 |
|    |             |             |             | 1  | 0.07875400  | 3.02170200  | -6.02864500 |
|    |             |             |             | 1  | -0.20387300 | 4.69428200  | -0.52018700 |
|    |             |             |             | 1  | 1.20415100  | 3.80453400  | -4.89125300 |
|    |             |             |             | 6  | -1.28957100 | -5.16733600 | -3.58061900 |
|    |             |             |             | 1  | -1.58047900 | -5.32779400 | -4.62863600 |
|    |             |             |             | 1  | -0.28245800 | -5.59428100 | -3.43870400 |
|    |             |             |             | 1  | -1.97555000 | -5.74608300 | -2.94203200 |
|    |             |             |             | 6  | -1.64962400 | -0.29526500 | -4.90572600 |
|    |             |             |             | 1  | -2.66370500 | 0.13426800  | -4.85158800 |
|    |             |             |             | 1  | -0.95065500 | 0.54285300  | -4.77393200 |
|    |             |             |             | 1  | -1.51739800 | -0.70765400 | -5.91639300 |
|    |             |             |             | 6  | -2.11660900 | -6.00522900 | 2.63576200  |
|    |             |             |             | 1  | -3.10520600 | -5.54798900 | 2.48493300  |
|    |             |             |             | 1  | -2.13861100 | -7.01857300 | 2.20415100  |
|    |             |             |             | 1  | -1.96390000 | -6.12140500 | 3.72192400  |
|    |             |             |             | 6  | 2.73687800  | -5.43360000 | 1.30161800  |
|    |             |             |             | 1  | 2.86488500  | -6.35835200 | 1.88254800  |
|    |             |             |             | 1  | 3.00317700  | -5.65185600 | 0.25393900  |
|    |             |             |             | 1  | 3.46272400  | -4.69051400 | 1.66803800  |
| 26 | -2.42207900 | 0.81624000  | 2.02558300  | 1  | -1.18221400 | -1.42635300 | 3.14698900  |
| 6  | -1.10917000 | 2.18070900  | 1.25323100  | 6  | 0.63936900  | 1.16920700  | 2.93008300  |
| 6  | -2.81248400 | 2.74852800  | 2.70826900  | 1  | 0.96506800  | 0.63296200  | 2.00018700  |
| 6  | -0.70880600 | 1.76831800  | 2.58524000  | 6  | -4.14375700 | -0.54472000 | -0.52844900 |
| 6  | -1.77862300 | 2.12811900  | 3.46570300  | 1  | -3.50875600 | 0.01877500  | -1.23096000 |
| 1  | 1.83316500  | -3.00173800 | 0.49525000  | 7  | -4.17590000 | -1.89637900 | -1.06618900 |
| 1  | -2.30714400 | -3.51634900 | 1.55809900  | 6  | -5.49137400 | 0.18641700  | -0.45418200 |
| 1  | -1.17651800 | 0.06283600  | -2.25481200 | 6  | -5.53623000 | 1.56233000  | -0.18109500 |
| 1  | -0.96148400 | -4.09163700 | -1.12768000 | 6  | -6.70625600 | -0.48608200 | -0.63435900 |
| 1  | -3.52108600 | -0.63025800 | 4.19650800  | 6  | -6.74810000 | 2.24806400  | -0.10005900 |
| 1  | -5.17146200 | 0.01025600  | 2.14416300  | 1  | -4.60728100 | 2.09957100  | -0.00242300 |
| 1  | -3.76740000 | 3.09861600  | 3.09553000  | 6  | -7.92582400 | 0.19575300  | -0.55749500 |
| 1  | -1.82232500 | 1.92071500  | 4.53019900  | 1  | -6.70960500 | -1.55531200 | -0.83463300 |
| 1  | -2.95653000 | 3.23936600  | 0.53238200  | 6  | -7.95334200 | 1.56547300  | -0.29271400 |
| 1  | 0.51291900  | -6.65571200 | 2.34825400  | 1  | -6.75298100 | 3.31915200  | 0.11724900  |
| 1  | -1.62525000 | -3.00205700 | -5.22673800 | 1  | -8.85930700 | -0.35251200 | -0.70420800 |

**TS0'-Re- Ca**

E = -5300.00817248 G = -5298.745322

|                                        |             |             |             |    |             |             |             |
|----------------------------------------|-------------|-------------|-------------|----|-------------|-------------|-------------|
| 1                                      | -8.90521500 | 2.09768500  | -0.23223900 | 6  | -2.21460200 | -1.00794500 | 2.53367900  |
| 6                                      | -4.50217800 | -2.02598600 | -2.46498900 | 6  | -3.55395700 | -0.69531700 | 2.87859200  |
| 1                                      | -5.59111900 | -2.04193100 | -2.68170300 | 6  | -4.29665700 | -0.58297500 | 1.67412400  |
| 1                                      | -4.06354100 | -1.19117700 | -3.02929200 | 15 | -0.44574700 | -1.44415700 | 0.39859100  |
| 1                                      | -4.06816700 | -2.95702800 | -2.86207800 | 15 | -0.17137000 | 2.03892800  | -0.34360700 |
| 6                                      | -4.56548700 | -3.02177800 | -0.25055400 | 6  | -0.62683500 | -2.17908900 | -1.28734900 |
| 1                                      | -3.99830600 | -3.91830300 | -0.56027500 | 6  | -0.00475000 | -2.93360800 | 1.39245300  |
| 1                                      | -4.33804700 | -2.83146600 | 0.80586500  | 6  | 1.33999400  | -3.29030100 | 1.51374800  |
| 1                                      | -5.64345700 | -3.28158100 | -0.31264600 | 6  | 1.71500200  | -4.45941800 | 2.19485400  |
| 7                                      | 1.65032600  | 2.20185900  | 3.12968300  | 6  | 0.71584200  | -5.26562800 | 2.74690200  |
| 6                                      | 0.64290100  | 0.07402700  | 3.98987900  | 6  | -0.64530800 | -4.93727300 | 2.62649500  |
| 6                                      | 1.15286100  | -1.18887200 | 3.65296400  | 6  | -0.99256900 | -3.76916800 | 1.94238100  |
| 6                                      | 0.19986200  | 0.29008900  | 5.30339100  | 6  | -0.76159800 | -1.34193200 | -2.40271800 |
| 6                                      | 1.15314300  | -2.23298900 | 4.58017400  | 6  | -0.77743400 | -1.86576100 | -3.70073100 |
| 1                                      | 1.54857600  | -1.36290300 | 2.65080500  | 6  | -0.62644100 | -3.24968900 | -3.86808600 |
| 6                                      | 0.20870000  | -0.75074200 | 6.23621700  | 6  | -0.47775300 | -4.10679000 | -2.77279700 |
| 1                                      | -0.15516700 | 1.27356600  | 5.61180000  | 6  | -0.48594100 | -3.55793500 | -1.48261600 |
| 6                                      | 0.67077500  | -2.01986600 | 5.87402400  | 26 | -2.71702600 | 0.77885300  | 1.69210800  |
| 1                                      | 1.52492100  | -3.21549100 | 4.28039700  | 6  | -1.47646300 | 2.20487700  | 0.90563200  |
| 1                                      | -0.14938800 | -0.56878600 | 7.25233900  | 6  | -3.40942400 | 2.70900700  | 2.06746100  |
| 1                                      | 0.66467100  | -2.83402300 | 6.60233400  | 6  | -1.20930900 | 2.00209200  | 2.31681600  |
| 6                                      | 2.98345200  | 1.66842500  | 3.31128500  | 6  | -2.41928400 | 2.31875700  | 3.01359300  |
| 1                                      | 3.72015900  | 2.47686600  | 3.18505500  | 1  | 2.10299300  | -2.62873400 | 1.11235000  |
| 1                                      | 3.14900300  | 1.20877600  | 4.30725700  | 1  | -2.04627700 | -3.51898600 | 1.83372900  |
| 1                                      | 3.17963100  | 0.89253000  | 2.55394000  | 1  | -0.83761700 | -0.26653000 | -2.26874200 |
| 6                                      | 1.34554700  | 3.31707400  | 3.99890800  | 1  | -0.35897300 | -4.22262500 | -0.62911100 |
| 1                                      | 1.36526800  | 3.06485900  | 5.08094600  | 1  | -3.92797500 | -0.53530600 | 3.88777800  |
| 1                                      | 2.09146000  | 4.11075700  | 3.83119500  | 1  | -5.35273300 | -0.34159500 | 1.59014200  |
| 1                                      | 0.36089700  | 3.73705100  | 3.75570700  | 1  | -4.44077400 | 2.97346900  | 2.29270000  |
| 6                                      | 3.39887200  | -1.99418200 | -1.41631200 | 1  | -2.57819900 | 2.23177500  | 4.08374900  |
| 6                                      | 3.85763000  | -3.28949000 | -1.64061200 | 1  | -3.32304000 | 2.92304900  | -0.15590200 |
| 1                                      | 4.61147400  | -3.71531900 | -0.97354500 | 1  | 0.99760700  | -6.17652200 | 3.28394000  |
| 6                                      | 3.34556900  | -4.04623100 | -2.70191000 | 1  | -0.61858100 | -3.66726200 | -4.87893500 |
| 1                                      | 3.70276200  | -5.06497600 | -2.86934800 | 45 | 1.21719200  | 0.30278300  | 0.22468400  |
| 6                                      | 2.37217700  | -3.49670000 | -3.54128600 | 6  | 0.61740700  | 3.70466700  | -0.17353500 |
| 1                                      | 1.96693400  | -4.08209000 | -4.36941900 | 6  | 1.85136100  | 3.87405600  | 0.45718500  |
| 6                                      | 1.90483400  | -2.19907100 | -3.31913400 | 6  | -0.10202300 | 4.83267300  | -0.59689200 |
| 1                                      | 1.13725800  | -1.77762400 | -3.96721000 | 6  | 2.39255300  | 5.15336800  | 0.64816500  |
| 6                                      | 2.40370600  | -1.44099100 | -2.25247000 | 1  | 2.39371600  | 3.00470700  | 0.81844400  |
| 6                                      | 1.93740900  | -0.06977600 | -1.96657400 | 6  | 0.40868800  | 6.12228200  | -0.41344300 |
| 6                                      | 2.82740000  | 0.84030300  | -1.28535300 | 1  | -1.07266600 | 4.71116900  | -1.08254900 |
| 6                                      | 3.92803200  | 0.30764100  | -0.55576200 | 6  | 1.66091500  | 6.26097100  | 0.20525700  |
| 6                                      | 3.77182400  | -1.17441700 | -0.19850500 | 1  | 2.07512200  | 7.26423600  | 0.34548500  |
| 1                                      | 4.69094800  | -1.57355800 | 0.26693100  | 6  | -0.89440500 | 2.19127200  | -2.02020000 |
| 1                                      | 1.23047800  | 0.34808600  | -2.68635700 | 6  | -2.19806800 | 1.81544900  | -2.34852900 |
| 1                                      | 4.35958300  | 0.93099600  | 0.23202400  | 6  | -0.03422800 | 2.65166600  | -3.03453300 |
| 1                                      | 2.76391900  | 1.91160300  | -1.46768600 | 6  | -2.67079900 | 1.91640000  | -3.66933500 |
| 8                                      | 2.71322700  | -1.21303300 | 0.71027400  | 1  | -2.85220000 | 1.42309700  | -1.57620700 |
| 6                                      | 7.24295700  | -0.74596300 | -0.72575900 | 6  | -0.47658900 | 2.76544100  | -4.35463800 |
| 6                                      | 6.78001400  | -1.44719100 | -1.83355100 | 1  | 0.98504700  | 2.95683000  | -2.78829400 |
| 6                                      | 5.83348300  | -0.60525700 | -2.42778400 | 6  | -1.80130000 | 2.40219300  | -4.64924100 |
| 6                                      | 5.70466300  | 0.56868900  | -1.65082200 | 1  | -2.15738800 | 2.48556200  | -5.67992300 |
| 8                                      | 6.66687600  | 0.44668400  | -0.61347000 | 6  | 3.72092600  | 5.33394100  | 1.34002600  |
| 1                                      | 7.07622600  | -2.45064700 | -2.12357200 | 1  | 4.32658400  | 6.11563200  | 0.85627700  |
| 1                                      | 5.25533700  | -0.81057100 | -3.32629900 | 1  | 3.58340000  | 5.63796600  | 2.39159200  |
| 8                                      | 8.09449700  | -1.12612000 | 0.19892600  | 1  | 4.30407800  | 4.40085300  | 1.34485200  |
| 6                                      | 5.54105200  | 1.96890300  | -2.15649600 | 6  | -0.35728200 | 7.33766600  | -0.87088300 |
| 1                                      | 6.48245200  | 2.33732900  | -2.59453200 | 1  | -0.57516600 | 8.01102900  | -0.02589800 |
| 1                                      | 4.76785700  | 1.98214800  | -2.93600900 | 1  | 0.22199200  | 7.92089600  | -1.60525800 |
| 1                                      | 5.23525000  | 2.65645900  | -1.35418500 | 1  | -1.31342400 | 7.06095400  | -1.33760900 |
| 1                                      | 8.24072800  | -0.41417400 | 0.84335700  | 6  | -4.07374200 | 1.49198300  | -4.01771200 |
|                                        |             |             |             | 1  | -4.82403900 | 2.11611300  | -3.50860700 |
|                                        |             |             |             | 1  | -4.25401400 | 1.55803800  | -5.09977900 |
|                                        |             |             |             | 1  | -4.26994200 | 0.45687700  | -3.69825100 |
|                                        |             |             |             | 6  | 0.43627900  | 3.26534600  | -5.44448900 |
|                                        |             |             |             | 1  | 0.55054100  | 2.51316200  | -6.24220700 |
|                                        |             |             |             | 1  | 0.02888200  | 4.17384000  | -5.91675800 |
| <b>TS0'-Si-Cγ</b>                      |             |             |             |    |             |             |             |
| E = -5300.00667254    G = -5298.744643 |             |             |             |    |             |             |             |
| 6                                      | -2.82876800 | 2.65553300  | 0.77203900  | 6  | 0.43627900  | 3.26534600  | -5.44448900 |
| 6                                      | -3.43018200 | -0.83756800 | 0.56464800  | 1  | 0.55054100  | 2.51316200  | -6.24220700 |
| 6                                      | -2.10717200 | -1.08267600 | 1.10108300  | 1  | 0.02888200  | 4.17384000  | -5.91675800 |

|   |             |             |             |                   |                |             |              |
|---|-------------|-------------|-------------|-------------------|----------------|-------------|--------------|
| 1 | 1.43663600  | 3.50577600  | -5.05689400 | 6                 | 3.14876000     | -3.46142400 | -2.72276500  |
| 6 | -0.27999800 | -5.58968600 | -2.95553600 | 1                 | 2.89555700     | -4.17514300 | -3.50969900  |
| 1 | -0.40519700 | -5.89138000 | -4.00534800 | 6                 | 2.54020400     | -2.20213000 | -2.71162600  |
| 1 | 0.73109100  | -5.89080600 | -2.63360800 | 1                 | 1.81939500     | -1.94054400 | -3.48529400  |
| 1 | -0.99433100 | -6.16627000 | -2.34655000 | 6                 | 2.83171400     | -1.28402300 | -1.69733100  |
| 6 | -0.94631900 | -0.96057500 | -4.89297000 | 6                 | 2.20312700     | 0.05224100  | -1.62792800  |
| 1 | -2.00283700 | -0.67461000 | -5.02716600 | 6                 | 2.88134200     | 1.12241800  | -0.93483400  |
| 1 | -0.38444300 | -0.02380800 | -4.77054000 | 6                 | 3.97541300     | 0.78701400  | -0.06295500  |
| 1 | -0.61641400 | -1.45038300 | -5.82068000 | 6                 | 3.90438600     | -0.65771400 | 0.44689200   |
| 6 | -1.70316800 | -5.82177000 | 3.23640500  | 1                 | 4.78980200     | -0.90088900 | 1.06321300   |
| 1 | -2.71231200 | -5.52093700 | 2.91968000  | 1                 | 1.56321100     | 0.31431000  | -2.47356600  |
| 1 | -1.55626800 | -6.87684900 | 2.95585900  | 1                 | 4.23101400     | 1.51141100  | 0.71633700   |
| 1 | -1.67071700 | -5.77399000 | 4.33795100  | 1                 | 2.76282000     | 2.15319800  | -1.26927000  |
| 6 | 3.17447800  | -4.82243200 | 2.30456400  | 8                 | 2.75051400     | -0.70951300 | 1.22097800   |
| 1 | 3.33880700  | -5.64694000 | 3.01329800  | 6                 | 6.61243400     | 0.26056400  | -0.46591500  |
| 1 | 3.57424900  | -5.13336300 | 1.32483900  | 6                 | 5.66013100     | 1.09083600  | -1.09746000  |
| 1 | 3.77132100  | -3.95750800 | 2.63478600  | 6                 | 5.56510600     | 0.50676700  | -2.44199000  |
| 1 | -1.39975400 | -1.15195800 | 3.23224100  | 6                 | 6.30569400     | -0.61783700 | -2.47297900  |
| 6 | 0.14202600  | 1.62418400  | 2.89050400  | 8                 | 6.94675700     | -0.77234800 | -1.21508900  |
| 1 | 0.65734600  | 1.05568700  | 2.07176500  | 1                 | 5.65634500     | 2.16426500  | -0.91115300  |
| 6 | -3.92976800 | -1.05724300 | -0.84915600 | 1                 | 4.94176600     | 0.87575600  | -3.25195600  |
| 1 | -3.27913800 | -0.49283400 | -1.53649300 | 8                 | 7.12902100     | 0.38064800  | 0.73069000   |
| 7 | -3.74149100 | -2.45021700 | -1.22516800 | 6                 | 6.55874200     | -1.68706300 | -3.46126900  |
| 6 | -5.35046600 | -0.50108300 | -1.01507400 | 1                 | 6.17266100     | -2.65083900 | -3.09606400  |
| 6 | -5.57736900 | 0.88302200  | -0.97875700 | 1                 | 6.04421800     | -1.44320800 | -4.39977400  |
| 6 | -6.45745200 | -1.34345300 | -1.17652700 | 1                 | 7.63594600     | -1.79702700 | -3.66506700  |
| 6 | -6.86146500 | 1.41260400  | -1.10691500 | 1                 | 7.71267400     | -0.37059800 | 0.93407300   |
| 1 | -4.73712700 | 1.55640900  | -0.82353200 |                   |                |             |              |
| 6 | -7.74809800 | -0.81958100 | -1.30886000 |                   |                |             |              |
| 1 | -6.31903600 | -2.42245000 | -1.19723200 |                   |                |             |              |
| 6 | -7.95670000 | 0.55990200  | -1.27649400 |                   |                |             |              |
| 1 | -7.00906300 | 2.49494600  | -1.07200900 |                   |                |             |              |
| 1 | -8.59453500 | -1.49847300 | -1.43609400 |                   |                |             |              |
| 1 | -8.96420200 | 0.96898300  | -1.37936600 |                   |                |             |              |
| 6 | -3.90319300 | -2.76062600 | -2.62395300 |                   |                |             |              |
| 1 | -4.95697700 | -2.91327000 | -2.93955200 |                   |                |             |              |
| 1 | -3.48661600 | -1.94872200 | -3.23697300 |                   |                |             |              |
| 1 | -3.34361500 | -3.67738000 | -2.86681000 |                   |                |             |              |
| 6 | -4.07789100 | -3.52815600 | -0.32616600 |                   |                |             |              |
| 1 | -3.36705400 | -4.36323600 | -0.46426900 |                   |                |             |              |
| 1 | -4.00596300 | -3.19820800 | 0.71768500  |                   |                |             |              |
| 1 | -5.09806200 | -3.94284800 | -0.47020600 |                   |                |             |              |
| 7 | 0.98448200  | 2.79506300  | 3.10390100  |                   |                |             |              |
| 6 | 0.13035300  | 0.63879600  | 4.05338800  |                   |                |             |              |
| 6 | 0.82780400  | -0.57116600 | 3.92086400  |                   |                |             |              |
| 6 | -0.51669200 | 0.91037600  | 5.26827500  |                   |                |             |              |
| 6 | 0.81711000  | -1.52123800 | 4.94429000  |                   |                |             |              |
| 1 | 1.37895600  | -0.78079800 | 3.00257100  |                   |                |             |              |
| 6 | -0.52002100 | -0.03449900 | 6.29808500  |                   |                |             |              |
| 1 | -1.02499300 | 1.86223900  | 5.42260000  |                   |                |             |              |
| 6 | 0.13312000  | -1.26016500 | 6.13419100  |                   |                |             |              |
| 1 | 1.33824900  | -2.47030500 | 4.79923800  |                   |                |             |              |
| 1 | -1.03819700 | 0.18799000  | 7.23395100  |                   |                |             |              |
| 1 | 0.11708200  | -2.00155000 | 6.93634300  |                   |                |             |              |
| 6 | 2.33487600  | 2.46022300  | 3.50293500  |                   |                |             |              |
| 1 | 2.98050900  | 3.34402800  | 3.38584600  |                   |                |             |              |
| 1 | 2.41779300  | 2.11362400  | 4.55342800  |                   |                |             |              |
| 1 | 2.72296800  | 1.65424500  | 2.85941400  |                   |                |             |              |
| 6 | 0.43387200  | 3.93422600  | 3.80445500  |                   |                |             |              |
| 1 | 0.33325900  | 3.78490200  | 4.90109900  |                   |                |             |              |
| 1 | 1.09755100  | 4.80005400  | 3.64894400  |                   |                |             |              |
| 1 | -0.54997200 | 4.19900400  | 3.39585500  |                   |                |             |              |
| 6 | 3.76943600  | -1.63440500 | -0.70072400 |                   |                |             |              |
| 6 | 4.37840900  | -2.88457500 | -0.71959700 |                   |                |             |              |
| 1 | 5.08605300  | -3.15183200 | 0.06953500  |                   |                |             |              |
| 6 | 4.06501500  | -3.80798400 | -1.72747900 |                   |                |             |              |
| 1 | 4.53091800  | -4.79623100 | -1.72848800 |                   |                |             |              |
|   |             |             |             | <b>TS0'-Re-Cγ</b> |                |             |              |
|   |             |             |             | E =               | -5300.00627905 | G =         | -5298.743659 |
|   |             |             |             | 6                 | 1.95994900     | -2.99797800 | 1.45791200   |
|   |             |             |             | 6                 | 3.47200000     | 0.17529700  | 0.93920100   |
|   |             |             |             | 6                 | 2.19668600     | 0.80942900  | 1.20270700   |
|   |             |             |             | 6                 | 2.08009200     | 0.94014100  | 2.63068600   |
|   |             |             |             | 6                 | 3.23103000     | 0.37834700  | 3.23911200   |
|   |             |             |             | 6                 | 4.07934000     | -0.09727400 | 2.20520400   |
|   |             |             |             | 15                | 0.80480900     | 1.43932000  | 0.17887800   |
|   |             |             |             | 15                | -0.25444200    | -1.94891400 | -0.17752400  |
|   |             |             |             | 6                 | 1.40036500     | 1.83188000  | -1.52499000  |
|   |             |             |             | 6                 | 0.62205500     | 3.12801800  | 0.89466700   |
|   |             |             |             | 6                 | -0.58204400    | 3.81061900  | 0.70803600   |
|   |             |             |             | 6                 | -0.74027400    | 5.12833100  | 1.16619500   |
|   |             |             |             | 6                 | 0.33394000     | 5.74940600  | 1.80906600   |
|   |             |             |             | 6                 | 1.56163000     | 5.09100100  | 1.99491900   |
|   |             |             |             | 6                 | 1.69404500     | 3.78018400  | 1.52888200   |
|   |             |             |             | 6                 | 1.46879900     | 0.82074700  | -2.49225900  |
|   |             |             |             | 6                 | 1.79478000     | 1.11491800  | -3.82148100  |
|   |             |             |             | 6                 | 2.02475700     | 2.45167900  | -4.17636000  |
|   |             |             |             | 6                 | 1.95141100     | 3.48200000  | -3.23310800  |
|   |             |             |             | 6                 | 1.64473100     | 3.15703600  | -1.90421100  |
|   |             |             |             | 26                | 2.21312800     | -1.02555000 | 2.11006800   |
|   |             |             |             | 6                 | 0.76728900     | -2.22252800 | 1.29581100   |
|   |             |             |             | 6                 | 2.31935000     | -2.97851800 | 2.83211400   |
|   |             |             |             | 6                 | 0.36746700     | -1.73713100 | 2.60337900   |
|   |             |             |             | 6                 | 1.34306500     | -2.21660700 | 3.53504300   |
|   |             |             |             | 1                 | -1.41709500    | 3.29763500  | 0.23946100   |
|   |             |             |             | 1                 | 2.64842100     | 3.27269300  | 1.65669300   |
|   |             |             |             | 1                 | 1.25007200     | -0.20778000 | -2.21950400  |
|   |             |             |             | 1                 | 1.57702200     | 3.95897500  | -1.17034600  |
|   |             |             |             | 1                 | 3.40673400     | 0.29769400  | 4.30989600   |
|   |             |             |             | 1                 | 5.03797000     | -0.59163500 | 2.33633100   |
|   |             |             |             | 1                 | 3.20396200     | -3.44096000 | 3.26566200   |
|   |             |             |             | 1                 | 1.36768700     | -1.99868100 | 4.59807100   |
|   |             |             |             | 1                 | 2.49240300     | -3.52104500 | 0.67059000   |
|   |             |             |             | 1                 | 0.22000800     | 6.77485800  | 2.17368900   |
|   |             |             |             | 1                 | 2.26019800     | 2.69463400  | -5.21639500  |
|   |             |             |             | 45                | -1.20715700    | 0.13577100  | -0.07089300  |

|   |             |             |             |   |             |             |             |
|---|-------------|-------------|-------------|---|-------------|-------------|-------------|
| 6 | -1.47294800 | -3.32671700 | 0.03937000  | 6 | 4.85850200  | 1.40973200  | -2.32281500 |
| 6 | -2.78030600 | -3.09089800 | 0.47053600  | 1 | 5.95006700  | 1.26816900  | -2.47020100 |
| 6 | -1.03248200 | -4.64724500 | -0.13512300 | 1 | 4.34143300  | 0.62800800  | -2.89724900 |
| 6 | -3.66435500 | -4.15374800 | 0.70303200  | 1 | 4.58320700  | 2.38007600  | -2.76464200 |
| 1 | -3.11395900 | -2.07199100 | 0.64412200  | 6 | 4.90749300  | 2.46327400  | -0.13458100 |
| 6 | -1.88969700 | -5.72916500 | 0.09614600  | 1 | 4.46211600  | 3.40930500  | -0.49291300 |
| 1 | -0.00917500 | -4.84303400 | -0.46241700 | 1 | 4.60704700  | 2.32918000  | 0.91205100  |
| 6 | -3.20428400 | -5.46110000 | 0.50754400  | 1 | 6.00981100  | 2.59843300  | -0.14533800 |
| 1 | -3.88657200 | -6.29872900 | 0.68288400  | 7 | -2.04492400 | -1.84735100 | 3.08329300  |
| 6 | 0.63419800  | -2.53258700 | -1.66976600 | 6 | -0.79772800 | 0.16665100  | 3.90269600  |
| 6 | 2.02382500  | -2.54042800 | -1.80221600 | 6 | -1.12650700 | 1.47122700  | 3.50484400  |
| 6 | -0.16372400 | -2.92151100 | -2.76206800 | 6 | -0.42237600 | -0.05316800 | 5.23653400  |
| 6 | 2.63567900  | -2.95676800 | -2.99833600 | 6 | -1.00993300 | 2.54297800  | 3.40930500  |
| 1 | 2.64255500  | -2.20441900 | -0.97620700 | 1 | -1.46773600 | 1.65715600  | 2.48503800  |
| 6 | 0.41559700  | -3.34323400 | -3.96105800 | 6 | -0.31528800 | 1.01639700  | 6.12985200  |
| 1 | -1.25171800 | -2.92665000 | -2.66849800 | 1 | -0.20936000 | -1.06168000 | 5.59132100  |
| 6 | 1.81716700  | -3.36345300 | -4.05506400 | 6 | -0.59295200 | 2.32023200  | 5.70717500  |
| 1 | 2.28121700  | -3.69003300 | -4.98993400 | 1 | -1.23674500 | 3.55332700  | 4.04446100  |
| 6 | -5.07233700 | -3.89580600 | 1.18023000  | 1 | -0.01069300 | 0.82967800  | 7.16242100  |
| 1 | -5.80154200 | -4.52926400 | 0.65078000  | 1 | -0.49492700 | 3.15525300  | 6.40465300  |
| 1 | -5.17500000 | -4.11954100 | 2.25548000  | 6 | -3.30137100 | -1.13951400 | 3.20682200  |
| 1 | -5.35871300 | -2.84400600 | 1.03601600  | 1 | -4.13416300 | -1.84875400 | 3.08288000  |
| 6 | -1.42130900 | -7.14978900 | -0.09234800 | 1 | -3.43186100 | -0.62712200 | 4.18204500  |
| 1 | -0.38033100 | -7.18898400 | -0.44355300 | 1 | -3.37390300 | -0.37139300 | 2.42016700  |
| 1 | -1.48122500 | -7.71573600 | 0.85169900  | 6 | -1.91160200 | -2.96111300 | 3.99627800  |
| 1 | -2.04736300 | -7.68238700 | -0.82659300 | 1 | -1.92357100 | -2.67056800 | 5.06886800  |
| 6 | 4.13556000  | -2.94314800 | -3.13892700 | 1 | -2.75222400 | -3.65482600 | 3.83322800  |
| 1 | 4.61595400  | -3.63006900 | -2.42561500 | 1 | -0.98616100 | -3.51596400 | 3.79461200  |
| 1 | 4.44443300  | -3.23371900 | -4.15274500 | 6 | -3.03929200 | 2.43650400  | -1.65026800 |
| 1 | 4.54795600  | -1.94465600 | -2.92636000 | 6 | -3.33439000 | 3.76406000  | -1.94418900 |
| 6 | -0.43238500 | -3.76369600 | -5.13361600 | 1 | -4.06659100 | 4.30116300  | -1.33558700 |
| 1 | -0.25605500 | -3.11017500 | -6.00386500 | 6 | -2.67977900 | 4.41540200  | -2.99934100 |
| 1 | -0.19073800 | -4.79101500 | -5.45012400 | 1 | -2.90627200 | 5.46079300  | -3.22101900 |
| 1 | -1.50447200 | -3.72619600 | -4.89295000 | 6 | -1.73204100 | 3.72572600  | -3.75843400 |
| 6 | 2.15844400  | 4.92244800  | -3.62469600 | 1 | -1.21459100 | 4.22758000  | -4.57889100 |
| 1 | 2.53583600  | 5.01520300  | -4.65316100 | 6 | -1.43797800 | 2.38929400  | -3.47148700 |
| 1 | 1.21037500  | 5.48267200  | -3.55994000 | 1 | -0.69795500 | 1.85512700  | -4.06611800 |
| 1 | 2.87237200  | 5.42189700  | -2.95090100 | 6 | -2.08232300 | 1.73492700  | -2.41646400 |
| 6 | 1.88956100  | 0.01863800  | -4.85025200 | 6 | -1.82692500 | 0.31776400  | -2.08613700 |
| 1 | 2.84458800  | -0.52575100 | -4.76270300 | 6 | -2.85244300 | -0.44769300 | -1.41604400 |
| 1 | 1.09331000  | -0.72743800 | -4.71788700 | 6 | -3.90855500 | 0.24393600  | -0.74314300 |
| 1 | 1.82980000  | 0.41927200  | -5.87256900 | 6 | -3.56898400 | 1.71465500  | -0.43193800 |
| 6 | 2.70370800  | 5.78461600  | 2.69343700  | 1 | -4.44686800 | 2.24074700  | -0.01939400 |
| 1 | 3.63043700  | 5.19574400  | 2.63407900  | 1 | -1.16073700 | -0.21210800 | -2.77058500 |
| 1 | 2.89967300  | 6.77649400  | 2.25591600  | 1 | -4.40101500 | -0.26782600 | 0.08773400  |
| 1 | 2.47595000  | 5.94318200  | 3.76094300  | 1 | -2.93029500 | -1.52147600 | -1.58424800 |
| 6 | -2.05087900 | 5.84074800  | 0.94667000  | 8 | -2.55384000 | 1.62870400  | 0.51741000  |
| 1 | -2.09198700 | 6.79739100  | 1.48717400  | 6 | -7.21173600 | 0.38970200  | -0.34695100 |
| 1 | -2.20780400 | 6.04841300  | -0.12479700 | 6 | -7.05727800 | -0.97881400 | -0.58276500 |
| 1 | -2.89698000 | 5.21837200  | 1.27876900  | 6 | -6.10403700 | -1.06379400 | -1.59677100 |
| 1 | 1.24132800  | 1.38158500  | 3.15419700  | 6 | -5.62998000 | 0.23714400  | -1.90443400 |
| 6 | -0.90404800 | -0.96035400 | 2.88186600  | 8 | -6.44050500 | 1.11773200  | -1.13858900 |
| 1 | -1.13302700 | -0.42414900 | 1.92366300  | 1 | -7.57755600 | -1.77550400 | -0.05911300 |
| 6 | 4.20385900  | 0.04538800  | -0.38162300 | 1 | -5.71154400 | -1.97568300 | -2.04491300 |
| 1 | 3.53208300  | -0.45069600 | -1.10067800 | 8 | -7.96528700 | 0.99240000  | 0.54109800  |
| 7 | 4.43479500  | 1.36656900  | -0.94518100 | 6 | -5.26122100 | 0.74944900  | -3.26248100 |
| 6 | 5.44220800  | -0.84857700 | -0.23073600 | 1 | -4.43903100 | 0.14208400  | -3.66609900 |
| 6 | 5.29880300  | -2.22125800 | 0.02226700  | 1 | -6.11869200 | 0.68331600  | -3.95067500 |
| 6 | 6.73974000  | -0.32815900 | -0.31113200 | 1 | -4.92042700 | 1.78971700  | -3.21366500 |
| 6 | 6.40907200  | -3.05067600 | 0.18088700  | 1 | -7.88046200 | 1.95767600  | 0.46700500  |
| 1 | 4.30085100  | -2.64312400 | 0.12138700  |   |             |             |             |
| 6 | 7.85825500  | -1.15439700 | -0.15624500 |   |             |             |             |
| 1 | 6.88684700  | 0.73428600  | -0.49359200 |   |             |             |             |
| 6 | 7.69914500  | -2.51905200 | 0.08834600  |   |             |             |             |
| 1 | 6.26777400  | -4.11598000 | 0.37996400  |   |             |             |             |
| 1 | 8.85984100  | -0.72373000 | -0.22604500 |   |             |             |             |
| 1 | 8.57213900  | -3.16416000 | 0.20958100  |   |             |             |             |

## 4.7 The key parameter for the diastereodivergent lactonization of **6** & **7**

**Table S13.** The role of components in the catalysis system A for the direct

lactonization from **6** & **7** to **3a**<sup>[a]</sup>

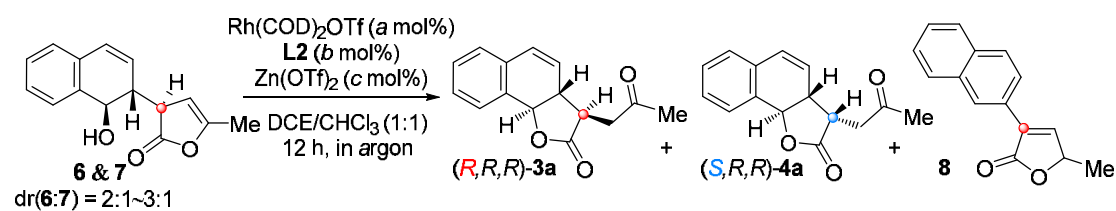

| entry            | Rh salt<br>( <i>a</i> mol%) | <b>L2</b><br>( <i>b</i> mol%) | Zn(OTf) <sub>2</sub><br>( <i>c</i> mol%) | Temp. | <b>(R,R,R)-3a</b><br>yield (%),<br>ee | <b>(S,R,R)-4a</b><br>yield (%),<br>ee | <b>6</b> & <b>7</b> (recovered)<br>or <b>8</b> |
|------------------|-----------------------------|-------------------------------|------------------------------------------|-------|---------------------------------------|---------------------------------------|------------------------------------------------|
| 1                | 5                           | 11                            | 50                                       | 45 °C | 12, 93%                               | 63, 94%                               | <b>8</b> : 11%                                 |
| 2                | 5                           | 11                            | 50                                       | 90 °C | 59, 93%                               | 29, 94%                               | --                                             |
| 3                | 0                           | 11                            | 50                                       | 90 °C | 61, 95%                               | 30, 94%                               | --                                             |
| 4 <sup>[b]</sup> | 0                           | 11                            | 50                                       | 90 °C | 57, 95%                               | 33, 91%                               | --                                             |
| 5                | 5                           | 11                            | 0                                        | 90 °C | --                                    | 18, 94%                               | <b>6+7</b> : 72% (no loss dr)                  |
| 6                | 0                           | 11                            | 0                                        | 90 °C | --                                    | 79, 94%                               | <b>6+7</b> : 18%, 1.5:1 dr                     |
| 7                | 0                           | 0                             | 50                                       | 90 °C | --                                    | --                                    | <b>8</b> : 87%                                 |
| 8                | 5                           | 0                             | 0                                        | 90 °C | --                                    | --                                    | <b>8</b> : 90%                                 |

[a] General reaction conditions: without otherwise noted, **6** & **7** (0.1 mmol), Rh(COD)<sub>2</sub>OTf (*a* mol%), **L2** (*b* mol%) and Zn(OTf)<sub>2</sub> (*c* mol%) are dissolved in the mixture solvent of DCE (1 mL) and CHCl<sub>3</sub> (1 mL), and subsequently added additive under argon atmosphere. Yield refers to the <sup>1</sup>H-NMR yield, in which 1,4-benzodioxan was used as the internal standard. Dr values were determined by <sup>1</sup>H-NMR and show **3a/4a** and dr of **7** refers to the diastereoselective ratio of **(S,R,R)-6** and **(R,R,R)-7**. Ee values was determined by HPLC analysis on a chiral stationary phase and show **3a/4a**. [b] Racemic ligand **L2** was used.

Under condition A, when the temperature increased from 45 °C to 90 °C, the main product obtained from the intermediate changed from **4a** to **3a**, (entries 1-2) further indicating that **3a** is a thermodynamically controlled product. When there is a lack of Rh(COD)<sub>2</sub>OTf or a change in ligand configuration, the conversion of intermediates is not affected. (entries 3-4) When lacking **L2** or Zn(OTf)<sub>2</sub>, there is no generation of product **3a**, only product **4a**, recovered intermediates, and isomerized/dehydrated product **8** can be detected. (entries 5-8) These experiments indicate that **3a** is not easily obtainable, and the isomerization of intermediates,

followed by the formation of product **4a**, is relatively easy to occur.

**Table S14.** The role of components in the catalyst system B on the  $\alpha$ -epimerization/lactonization of **6 & 7** <sup>[a]</sup>

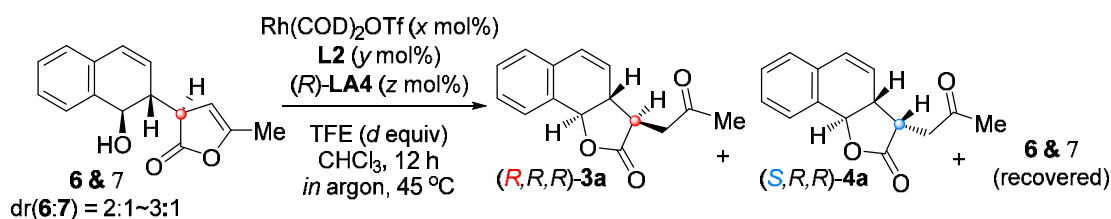

| entry            | Rh salt<br>( <i>x</i> mol%) | <b>L2</b><br>( <i>y</i> mol%) | <b>LA4</b><br>( <i>z</i> mol%) | TFE<br>( <i>d</i> equiv) | <b>(R,R,R)-3a</b><br>yield (%), ee | <b>(S,R,R)-4a</b><br>yield (%), ee | <b>6 &amp; 7</b><br>(recovered) |
|------------------|-----------------------------|-------------------------------|--------------------------------|--------------------------|------------------------------------|------------------------------------|---------------------------------|
| 1                | 5                           | 11                            | 20                             | 0                        | -                                  | 93, 92%                            | --                              |
| 2                | 5                           | 11                            | 20                             | 3.5                      | -                                  | 93, 93%                            | -                               |
| 3                | 0                           | 11                            | 20                             | 0                        | -                                  | 95, 94%                            | -                               |
| 4                | 0                           | 0                             | 20                             | 0                        | -                                  | 93, 95%                            | -                               |
| 5                | 0                           | 11                            | 0                              | 0                        | -                                  | 23, 94%                            | 67%, 2.4:1 dr                   |
| 6                | 5                           | 0                             | 0                              | 0                        | -                                  | -                                  | 94%, 3:1 dr                     |
| 7 <sup>[b]</sup> | 0                           | 0                             | 20                             | 0                        | 8, 94%                             | 84, 95%                            | -                               |

[a] General reaction conditions: without otherwise noted, **6 & 7** (0.1 mmol), **Rh(COD)<sub>2</sub>OTf** (*x* mol%), **L2** (*y* mol%), **(R)-LA4** (based on *z* mol% **Sn(OTf)<sub>2</sub>**), and **TFE** (*d* equiv) are dissolved in **CHCl<sub>3</sub>**, and subsequently added additive under argon atmosphere at 45 °C. Yield refers to the <sup>1</sup>H-NMR yield, in which 1,4-benzodioxan was used as the internal standard. Dr values were determined by <sup>1</sup>H NMR spectroscopy and show **3a/4a** and dr of **6 & 7** refers to the diastereoselective ratio of **(S,R,R)-6** and **(R,R,R)-7**. Ee values was determined by HPLC analysis on a chiral stationary phase and show **3a/4a**. [b] At 90 °C.

Under condition B, we investigated the effects of each component on the intramolecular lactonization of the intermediate. It was found that the cocatalyst **LA4** plays a crucial role in the lactonization of the intermediate. In the presence of **LA4**, the intermediate could still afford the product **4a** in high yield even when one or more other components were absent from the system. (entries 1-4) Only a trace amount of the lactonized product was obtained with a large excess of the intermediate remaining when only the **L2** was present in the system. (entry 5) No conversion of the intermediate into the product was observed when only the **Rh(COD)<sub>2</sub>OTf** was present. (entry 6) When **LA4** was the sole component and the temperature was elevated to 90 °C, a small amount of product **3a** was detected along with **4a**. (entry 7) These

experimental results demonstrate that **LA4** is the only effective component responsible for the transformation of the intermediate to the product, whereas the Rh(COD)<sub>2</sub>OTf, **L2** and TFE do not contribute to this process.

**Table S15.** The roles of components of combined Lewis acid **LA4** in the C $\alpha$ -epimerization/lactonization of **6 & 7**

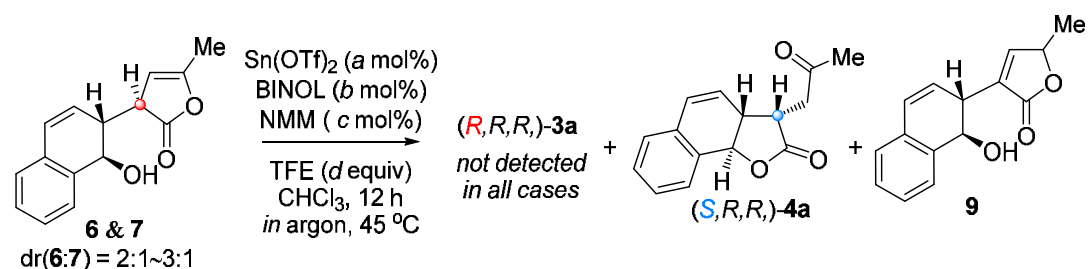

| entry | Sn(OTf) <sub>2</sub><br>( <i>a</i> mol%) | BINOL<br>( <i>b</i> mol%) | NMM<br>( <i>c</i> mol%) | TFE<br>( <i>d</i> equiv) | ( <i>S,R,R</i> )- <b>4a</b><br>yield (%), ee | <b>6 &amp; 7</b> (recovered)<br>or <b>9</b>        |
|-------|------------------------------------------|---------------------------|-------------------------|--------------------------|----------------------------------------------|----------------------------------------------------|
| 1     | 20                                       | 24                        | 48                      | 0                        | 93, 95%                                      | --                                                 |
| 2     | 0                                        | 0                         | 48                      | 0                        | 44, 95%                                      | <b>9</b> : 41%, 1:1 dr                             |
| 3     | 0                                        | 24                        | 0                       | 0                        | --                                           | <b>6+7</b> : 95%, 3:1 dr                           |
| 4     | 20                                       | 0                         | 0                       | 0                        | --                                           | complex                                            |
| 5     | 0                                        | 0                         | 0                       | 3.5                      | --                                           | <b>6+7</b> : 94%, 3:1 dr                           |
| 6     | 20                                       | 24                        | 0                       | 0                        | --                                           | complex                                            |
| 7     | 20                                       | 0                         | 48                      | 0                        | 45, 95%                                      | <b>6+7</b> : 45%, 1:1 dr                           |
| 8     | 0                                        | 24                        | 48                      | 0                        | 41, 92%                                      | <b>6+7</b> : 18%, 1:1 dr<br><b>9</b> : 33%, 1:1 dr |
| 9     | 0                                        | 24                        | 48                      | 3.5                      | 70, 93%                                      | <b>6+7</b> : 21%, 1:1 dr                           |
| 10    | 0                                        | 0                         | 48                      | 3.5                      | 41, 93%                                      | <b>6+7</b> : 54%, 1:1.2 dr                         |

[a] General reaction conditions: without otherwise noted, **6 & 7** (0.1 mmol), Sn(OTf)<sub>2</sub> (*a* mol%), (*R*)-BINOL (*b* mol%), NMM (*c* mol%) and TFE (*d* equiv) are dissolved in CHCl<sub>3</sub> and subsequently added additive under argon atmosphere at 45 °C. Yield refers to the <sup>1</sup>H-NMR yield, in which 1,4-benzodioxan was used as the internal standard. Dr values were determined by <sup>1</sup>H NMR spectroscopy and show **3a/4a** and dr of **6 & 7** refers to the diastereoselective ratio of (*S,R,R*)-**6** and (*R,R,R*)-**7**; drs of **3a/4a** in all cases are >20:1. Ee values was determined by HPLC analysis on a chiral stationary phase and show **3a/4a**.

Finally, to elucidate the specific roles of the combined cocatalyst **LA4** for the C $\alpha$ -epimerization/lactonization of **6 & 7** to (*S,R,R*)-**4a**, several control experiments were conducted using **6 & 7** with 2:1~3:1 dr as the substrate. As summarized in Table S15,

all the three components in **LA4** ( $\text{Sn}(\text{OTf})_2$ , BINOL, and NMM) were essential for the efficient formation of (*S,R,R*)-**4a** (entry 1). Systematic omission experiments revealed distinct functions for each component. The absence of NMM completely suppressed the formation of either cyclized product (*S,R,R*)-**4a** or (*R,R,R*)-**3a** (entries 3-6) and with no change in the diastereomeric ratio (dr) of recovered **6** & **7**. In contrast, all reactions conducted in the presence of NMM led to the recovered **7** with a decreased dr of approximately 1:1, along with varying yields of cyclized products **4a**. These observations suggest that NMM involves the deprotonation step to promote keto-enol tautomerization or epimerization that is the rate-determining step. Without BINOL, the yield of (*S,R,R*)-**4a** dropped to 45%, and 45% of **6** & **7** was recovered (entry 7). Without  $\text{Sn}(\text{OTf})_2$ , (*S,R,R*)-**4a** was obtained in 41% yield along with the formation of olefin isomerization byproduct **9** (33%) (entry 8). These control results revealed that **LA4** serves as a multifunctional catalyst that promote both epimerization via a proton-shuttle catalysis and the following lactonization. Moreover, TFE can effectively prevent the olefin isomerization of **6** & **7** to **9** (entries 8 vs 9; 2 vs 10). No (*R,R,R*)-**3a** formed in these control experiments further confirms that the direct lactonization of (*S,R,R*)-**6** to (*R,R,R*)-**3a** is an unfavorable process, likely involving a high-energy transition state. In contrast, the transformation pathway—epimerization of (*S,R,R*)-**6** to (*R,R,R*)-**7**, followed by lactonization to afford (*S,R,R*)-**4a**—is kinetically driven.

## 5. Gram-scale reaction

### 5.1 Gram-scale reaction of (*R,R,R*)-**3a**

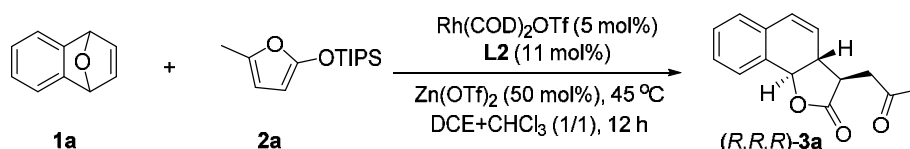

Under an argon atmosphere,  $\text{Rh}(\text{COD})_2\text{OTf}$  (117 mg, 5.0 mol%) and **L2** (515 mg, 11 mol%) were dissolved in the mixture solvent of DCE (50 mL) and  $\text{CHCl}_3$  (50 mL) and the resulting solution was stirred for 30 min at RT. Subsequently,  $\text{Zn}(\text{OTf})_2$  (910 mg, 50 mol%), **1a** (720 mg, 5 mmol) and **2a** (6.4 g, 25 mmol) were added. The

reaction mixture was stirred at 45 °C for 12 h. After reaction completion, the solvent was evaporated under reduced pressure. The residue was purified by flash column chromatography on silica gel (petroleum ether/ ethyl acetate = 10:1) to afford the (*R,R,R*)-**3a** (white solid, 0.82 g, 68% yield, 12:1 dr, 91% ee).

## 5.2 Gram-scale reaction of (*S,R,R*)-**4a**

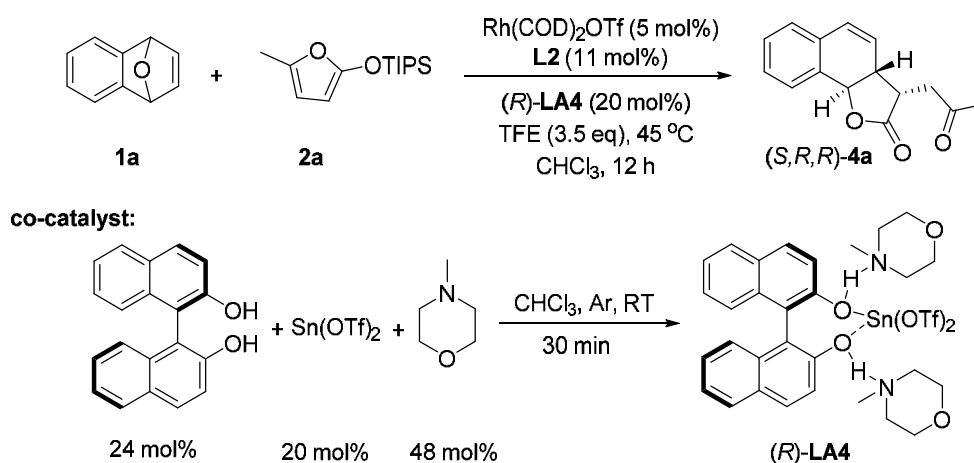

In a round-bottom flask,  $\text{Rh}(\text{COD})_2\text{OTf}$  (117 mg, 5.0 mol%) and **L2** (515 mg, 11 mol%) were dissolved in  $\text{CHCl}_3$  (50 mL) and the resulting solution was stirred for 30 min at RT. In another round-bottom flask, (*R*)-BINOL (342 mg, 24 mol%),  $\text{Sn}(\text{OTf})_2$  (417 mg, 20 mol%), NMM (245 mg, 48 mol%) were dissolved in  $\text{CHCl}_3$  (50.0 mL) and stirred for 30 min at RT, to give the solution of cocatalyst (*R*)-**LA4**. Then, the solution of cocatalyst (*R*)-**LA4** in  $\text{CHCl}_3$  were added to the first round-bottom flask. Subsequently, TFE (1.75 g, 3.5 eq), **1a** (720 mg, 5 mmol) and **2a** (6.4 g, 25 mmol) were added. The reaction mixture was stirred at 45 °C for 12 h. After reaction completion, the solvent was evaporated under reduced pressure. The residue was purified by flash column chromatography on silica gel (petroleum ether/ ethyl acetate = 10:1) to afford the (*S,R,R*)-**4a** (white solid, 0.88 g, 73% yield, 94% ee).

## 6. Synthetic transformations

We have successfully transformed the highly functionalized tricyclic  $\gamma$ -lactones **3a** into privileged chiral scaffolds including terpenoid tricyclic  $\gamma$ -lactones, monocyclic  $\gamma$ -lactones, dihydropyridazin-3(2H)-ones, and fused dioxabicyclo[3.2.1]octanes – structural motifs which are widely represented in natural products and pharmaceutical agents.

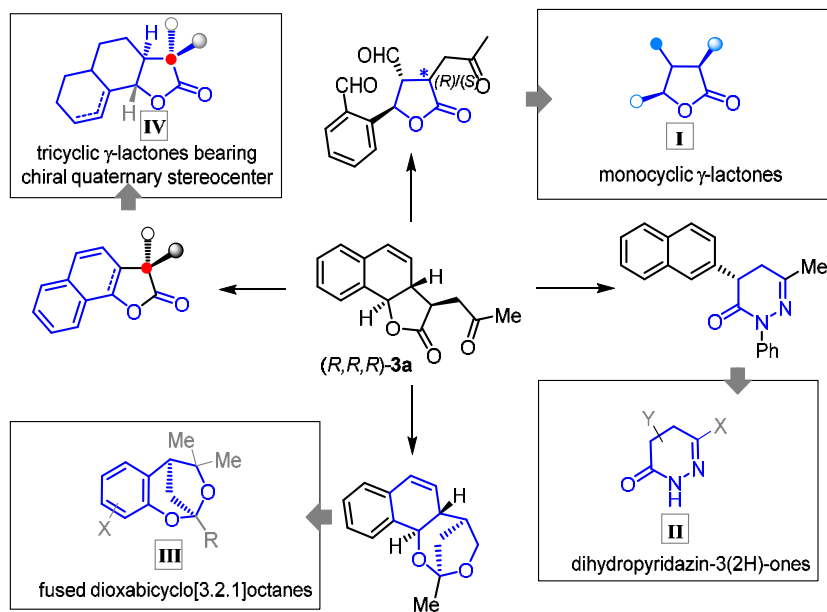

**Figure S11.** Skeletal transformation in the late stage.

### 6.1 Late-stage functionalization of alkene moiety

In addition to quaternary carbonization at the  $C\alpha$ -position, we can also modify the cyclic skeleton of the product, transforming it from the original 6,6,5-tricyclic skeleton to monocyclic  $\gamma$ -aryl- $\gamma$ -lactone, dihydropyridazin-3(2H)-ones, fused dioxabicyclo[3.2.1]octanes. These scaffolds are not only found in numerous natural products but can also serve as key intermediates in the synthesis of certain natural products.

#### 6.1.1 Stereodivergent synthesis of two stereoisomers of monocyclic $\gamma$ -lactones

The skeleton containing monocyclic  $\gamma$ -aryl- $\gamma$ -lactone exists in the natural products nicotlactone **B**,<sup>11</sup> solanamide **L**,<sup>12</sup> isohydroxymatairesinol, *epi*-isohydroxymatairesinol,<sup>13</sup> pycnanolide **B**,<sup>14</sup> gymnothelignan **X**<sub>5-8</sub>,<sup>15</sup> pharbilignan **D**,<sup>16</sup> eupomatilone **4/7**,<sup>17</sup> aminolactone,<sup>18</sup> paraconic acids,<sup>19</sup> and it also a butanolides-

intermediate of (±)-porosin.<sup>20</sup>

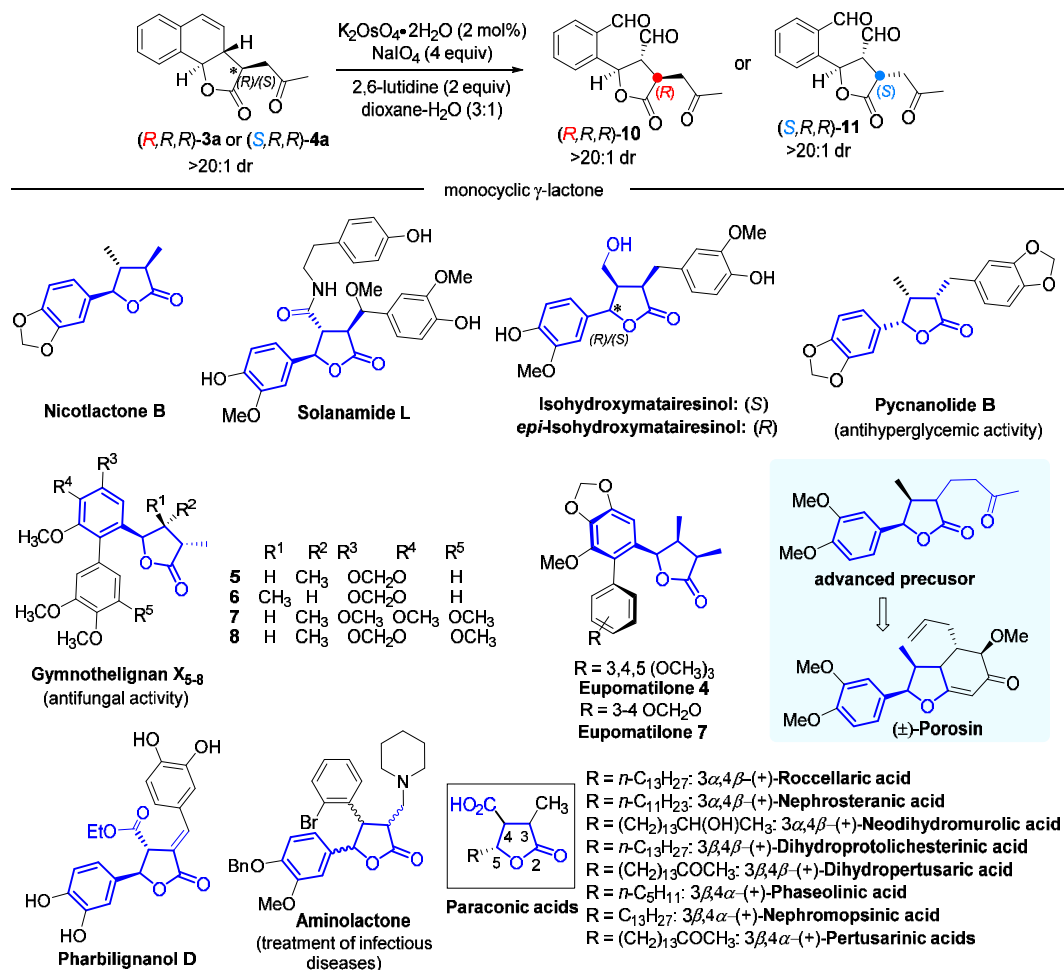

To a solution of compound (*R,R,R*)-**3a** (24.2 mg, 0.1 mmol, 1.0 equiv) or (*S,R,R*)-**4a** (24.2 mg, 0.1 mmol, 1.0 equiv) in dioxane-water (3:1, 1.0 mL) were added 2,6-lutidine (23  $\mu$ L, 0.2 mmol, 2.0 equiv), K<sub>2</sub>OsO<sub>4</sub>·2H<sub>2</sub>O (0.6 mg, 0.002 mmol, 2 mol%), and NaIO<sub>4</sub> (86.4 mg, 0.4 mmol, 4.0 equiv). The reaction was stirred at 25°C and monitored by TLC. After the reaction was complete, water (10 mL) and CH<sub>2</sub>Cl<sub>2</sub> (20 mL) were added. The organic layer was separated, and the water layer was extracted by CH<sub>2</sub>Cl<sub>2</sub> (10 mL) three times. The combined organic layer was washed with brine and dried over Na<sub>2</sub>SO<sub>4</sub>. The solvent was removed, and the product was purified with silica gel column chromatography to afford aldehyde **10** or **11** as a colorless oil.<sup>21</sup>

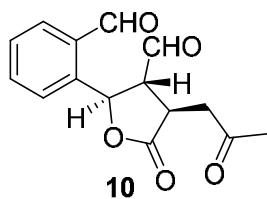

17.5 mg, 64% yield, >20:1 dr.

**<sup>1</sup>H NMR (600 MHz, CDCl<sub>3</sub>)** δ 10.00 (s, 1H), 9.86 (d, *J* = 3.2 Hz, 1H), 7.91 (d, *J* = 7.9 Hz, 1H), 7.85 (dd, *J* = 7.6, 1.4 Hz, 1H), 7.74 (td, *J* = 7.6, 1.5 Hz, 1H), 7.62 (t, *J* = 7.5 Hz, 1H), 6.45 (d, *J* = 8.3 Hz, 1H), 3.34 (ddd, *J* = 10.2, 7.1, 3.3 Hz, 1H), 3.12 – 2.98 (m, 3H), 2.16 (s, 3H);

**<sup>13</sup>C NMR (151 MHz, CDCl<sub>3</sub>)** δ 205.1, 197.0, 193.8, 175.8, 139.7, 136.0, 134.9, 132.4, 129.3, 127.3, 75.6, 61.3, 42.1, 37.9, 29.6;

**HRMS (ESI) m/z:** [M+Na]<sup>+</sup> calculated for C<sub>15</sub>H<sub>14</sub>O<sub>5</sub>Na<sup>+</sup>: 297.0733, found: 297.0736;

[α]<sub>D</sub><sup>25</sup> = +4.34 (c = 0.08, CHCl<sub>3</sub>).

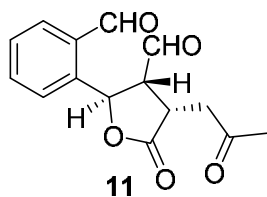

16 mg, 58% yield, >20:1 dr.

**<sup>1</sup>H NMR (600 MHz, CDCl<sub>3</sub>)** δ 10.07 (d, *J* = 0.8 Hz, 1H), 10.03 (dd, *J* = 1.8, 0.7 Hz, 1H), 7.97 (dd, *J* = 7.4, 1.5 Hz, 1H), 7.70 (td, *J* = 7.6, 1.5 Hz, 1H), 7.65 (tdd, *J* = 7.4, 1.3, 0.6 Hz, 1H), 7.58 (dd, *J* = 7.7, 1.1 Hz, 1H), 6.42 (s, 1H), 3.34 (dt, *J* = 9.5, 1.8 Hz, 1H), 3.15 – 3.07 (m, 2H), 2.97 – 2.90 (m, 1H), 2.17 (s, 3H).

**<sup>13</sup>C NMR (151 MHz, CDCl<sub>3</sub>)** δ 206.1, 200.5, 193.8, 176.8, 140.4, 137.1, 134.6, 131.7, 129.0, 124.8, 54.8, 39.7, 35.3, 29.7.

**HRMS (ESI) m/z:** [M+Na]<sup>+</sup> calculated for C<sub>15</sub>H<sub>14</sub>O<sub>5</sub>Na<sup>+</sup>: 297.0733, found: 297.0735;

[α]<sub>D</sub><sup>25</sup> = -3.50 (c = 0.08, CHCl<sub>3</sub>).

### 6.1.2 Functionalization of (*R,R,R*)-**3a** olefins.

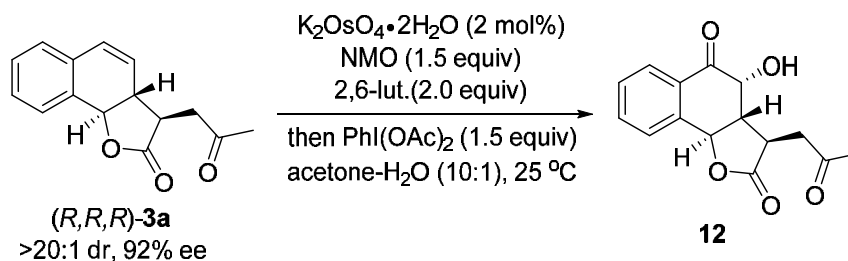

To a solution of (*R,R,R*)-**3a** (24.2 mg, 0.1 mmol, 1.0 equiv) in 10:1 acetone:water (0.1 M) was added 2,6-lutidine (23  $\mu\text{L}$ , 0.2 mmol, 2.0 equiv), 4-methylmorpholine *N*-oxide (17.6 mg, 0.15 mmol, 1.5 equiv), and  $\text{K}_2\text{OsO}_4 \cdot 2\text{H}_2\text{O}$  (0.6 mg, 0.002 mmol, 2 mol%). When the starting material had been consumed as monitored by TLC,  $\text{PhI}(\text{OAc})_2$  (48.3 mg, 0.15 mmol, 1.5 equiv) was added. After stirring for 2 h, the reaction was quenched with saturated aqueous sodium thiosulfate (5 mL). The mixture was extracted with ethyl acetate (3  $\times$  10 mL), washed with saturated aqueous copper sulfate (2  $\times$  20 mL), dried over sodium sulfate, and concentrated in vacuo. The crude residue was purified by flash column chromatography to give the product **12** (17.7 mg, 65% yield, >20:1 dr, 88% ee).<sup>22</sup>

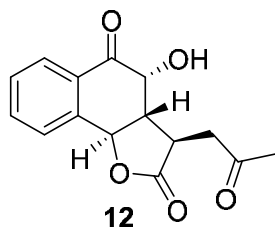

**<sup>1</sup>H NMR (600 MHz, Acetone-*d*<sub>6</sub>)**  $\delta$  7.99 (dd,  $J = 7.8, 1.3$  Hz, 1H), 7.73 (td,  $J = 7.6, 1.4$  Hz, 1H), 7.57 – 7.51 (m, 2H), 5.67 (d,  $J = 11.1$  Hz, 1H), 5.44 – 5.38 (m, 1H), 4.44 (dd,  $J = 4.6, 2.7$  Hz, 1H), 3.45 (ddd,  $J = 12.5, 6.8, 4.6$  Hz, 1H), 3.13 (dd,  $J = 18.5, 4.6$  Hz, 1H), 2.91 (dd,  $J = 18.5, 6.8$  Hz, 1H), 2.77 (ddd,  $J = 13.1, 11.1, 2.7$  Hz, 1H), 2.20 (s, 3H);

**<sup>13</sup>C NMR (151 MHz, Acetone-*d*<sub>6</sub>)**  $\delta$  206.1, 194.7, 177.0, 142.1, 134.9, 130.2, 129.3, 129.1, 123.9, 73.7, 70.2, 53.0, 41.4, 38.2, 30.2, 30.1, 29.9, 29.8, 29.7, 3.5, 29.4;

**HPLC analysis:** Daicel CHIRALCEL<sup>®</sup> OD-H, *n*-hexane/*i*-PrOH = 80/20, flow rate = 1.0 mL/min,  $\lambda = 254$  nm, retention time:  $t_{\text{minor}} = 18.0$  min,  $t_{\text{major}} = 20.1$  min;

**HRMS** (ESI)  $m/z$ :  $[M+Na]^+$  calculated for  $C_{15}H_{14}O_5Na^+$ : 297.0733, found: 297.0730;  
 $[\alpha]_D^{25} = -9.63$  ( $c = 0.08$ ,  $CHCl_3$ ).

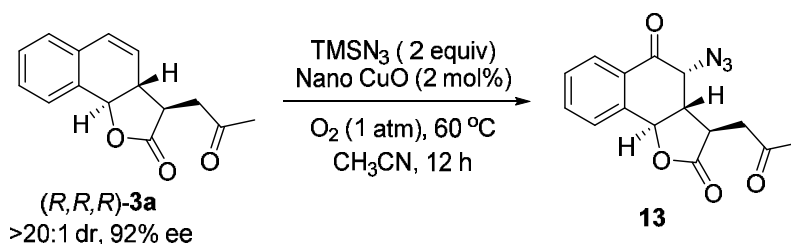

The solution of *(R,R,R)*-**3a** (24.2 mg, 0.1 mmol, 1.0 equiv), TMSN<sub>3</sub> (23 mg, 0.2 mmol, 2.0 equiv), and nano CuO (0.2 mg, 2 mol%) in MeCN (1 mL) was stirred at 60 °C for 12 h under the atmosphere of O<sub>2</sub> (1 atm). After cooling down to room temperature, the mixture was concentrated in vacuum, the residue was purified through column chromatography on silica gel to afford pure product **13** (10.8 mg, 36% yield, 5:1 dr, 78% ee).<sup>23</sup>

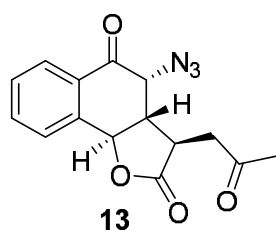

**<sup>1</sup>H NMR** (600 MHz, CDCl<sub>3</sub>)  $\delta$  8.16 – 8.02 (m, 1H), 7.68 (t,  $J = 7.4$  Hz, 1H), 7.58 (d,  $J = 7.8$  Hz, 1H), 7.50 (t,  $J = 8.1$  Hz, 1H), 5.46 (d,  $J = 10.9$  Hz, 1H), 4.41 (s, 1H), 3.35 (ddd,  $J = 12.3, 8.7, 3.8$  Hz, 1H), 3.24 (dd,  $J = 18.7, 3.7$  Hz, 1H), 2.72 (dt,  $J = 18.7, 5.3$  Hz, 1H), 2.66 – 2.57 (m, 1H), 2.25 (s, 3H);

**<sup>13</sup>C NMR** (151 MHz, CDCl<sub>3</sub>)  $\delta$  205.2, 190.4, 175.7, 140.2, 134.9, 129.3, 128.9, 128.4, 123.4, 73.2, 62.1, 50.9, 42.2, 4.25, 30.0;

**HPLC analysis:** Daicel CHIRALCEL<sup>®</sup> OD-H, *n*-hexane/*i*-PrOH = 85/15, flow rate = 1.0 mL/min,  $\lambda = 254$  nm, retention time:  $t_{\text{minor}} = 29.6$  min,  $t_{\text{major}} = 32.2$  min;

**HRMS** (ESI)  $m/z$ :  $[M+Na]^+$  calculated for  $C_{15}H_{13}O_4N_3Na^+$ : 322.0798, found: 322.0796;

$[\alpha]_D^{25} = +162.86$  ( $c = 0.07$ ,  $CHCl_3$ ).

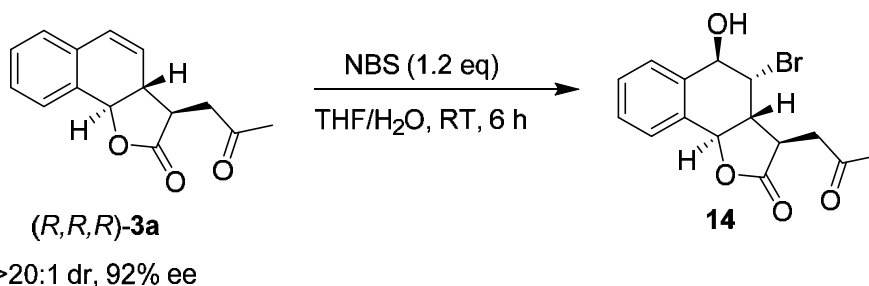

To a stirred solution of  $(R,R,R)$ -**3a** (24.2 mg, 0.1 mmol, 1.0 eq.) in THF/H<sub>2</sub>O (1.0 mL, v/v = 9:1) was added *N*-bromosuccinimide (NBS, 21.4 mg, 0.12 mmol, 1.2 eq.) at RT. After stirring for 6 h at RT, the reaction was extracted with ethyl acetate (2 × 20 mL) and then washed with H<sub>2</sub>O and brine, dried over Na<sub>2</sub>SO<sub>4</sub> and concentrated in vacuum. The crude product was purified by flash column chromatography on silica gel to yield the pure product **14** as white liquid (20.3 mg, 60% yield, >20:1 dr, 93% ee).<sup>24</sup>

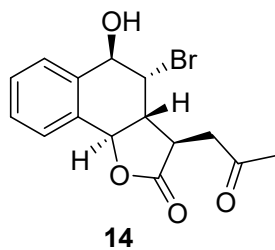

<sup>1</sup>H NMR (500 MHz, DMSO-*d*<sub>6</sub>) δ 7.51-7.46 (m, 1H), 7.43-7.37 (m, 2H), 7.37-7.33 (m, 1H), 6.34 (d, *J* = 6.1 Hz, 1H), 5.25 (d, *J* = 10.9 Hz, 1H), 4.94 (dd, *J* = 6.1, 2.0 Hz, 1H), 4.63 (t, *J* = 2.4 Hz, 1H), 3.13-2.99 (m, 2H), 2.88 (dd, *J* = 18.1, 5.7 Hz, 1H), 2.70 (td, *J* = 11.3, 2.8 Hz, 1H), 2.16 (s, 3H).

<sup>13</sup>C NMR (126 MHz, DMSO-*d*<sub>6</sub>) <sup>13</sup>C NMR (126 MHz, DMSO) δ 206.0, 176.4, 135.2, 133.45, 130.4, 128.1, 127.9, 122.9, 76.0, 73.3, 54.4, 45.2, 40.0, 39.9, 29.9.

HRMS (ESI) *m/z*: [M+Na]<sup>+</sup> calculated for C<sub>15</sub>H<sub>15</sub>BrO<sub>4</sub>Na<sup>+</sup>: 361.0046, found: 361.0049;

HPLC analysis: Daicel CHIRALPAK<sup>®</sup> AS-H, *n*-hexane/*i*-PrOH = 70/30, flow rate = 1.0 mL/min, λ = 210 nm, retention time: *t*<sub>minor</sub> = 8.7 min, *t*<sub>major</sub> = 11.5 min;

[α]<sub>D</sub><sup>25</sup> = +7.63 (c = 0.08, CHCl<sub>3</sub>).

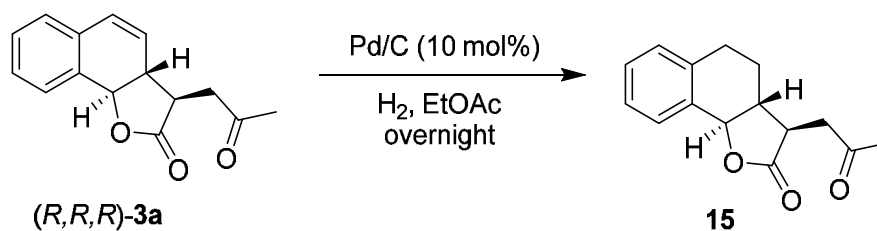

>20:1 dr, 92% ee

To a stirring solution of *(R,R,R)*-**3a** (24.2 mg, 0.1 mmol, 1.0 equiv) in ethyl acetate (1.0 mL) was slowly added palladium on-activated-charcoal (10%, 20.0 mg) at room temperature. The resulting mixture was stirred at room temperature in an atmosphere of hydrogen gas for overnight. The mixture was filtered and concentrated under reduced pressure. The residue was purified by column chromatography on silica gel to give **15** (24 mg, 98% yield).

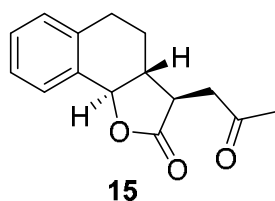

$^1\text{H NMR}$  (500 MHz,  $\text{CDCl}_3$ )  $\delta$  7.41-7.37 (m, 1H), 7.35-7.18 (m, 2H), 7.16-7.10 (m, 1H), 4.96 (d,  $J = 10.6$  Hz, 1H), 3.11 (dd,  $J = 18.3, 4.3$  Hz, 1H), 3.06-3.01 (m, 1H), 3.00-2.89 (m, 2H), 2.61 (dd,  $J = 18.3, 7.5$  Hz, 1H), 2.24 (s, 3H), 2.14-2.07 (m, 1H), 2.00-1.94 (m, 1H), 1.91-1.81 (m, 1H);

$^{13}\text{C NMR}$  (126 MHz,  $\text{CDCl}_3$ )  $\delta$  205.4, 178.1, 134.8, 134.5, 128.8, 127.7, 125.9, 123.2, 80.8, 47.3, 42.2, 42.2, 30.1, 27.6, 23.3;

**HRMS** (ESI)  $m/z$ :  $[\text{M}+\text{H}]^+$  calculated for  $\text{C}_{15}\text{H}_{17}\text{O}_3^+$ : 245.1172, found: 245.1175.

$[\alpha]_D^{25} = -89.50$  ( $c = 0.10, \text{CHCl}_3$ ).

## 6.2 Construction of fused dihydropyridazin-3(2H)-ones.

The skeleton containing dihydropyridazin-3(2H)-ones exists in the natural products pimobendan<sup>25</sup>, levosimendan<sup>26</sup>, meribendan<sup>27</sup>, bemoradan<sup>28</sup>, it can also be transformed into herbicides **41**.<sup>29</sup>

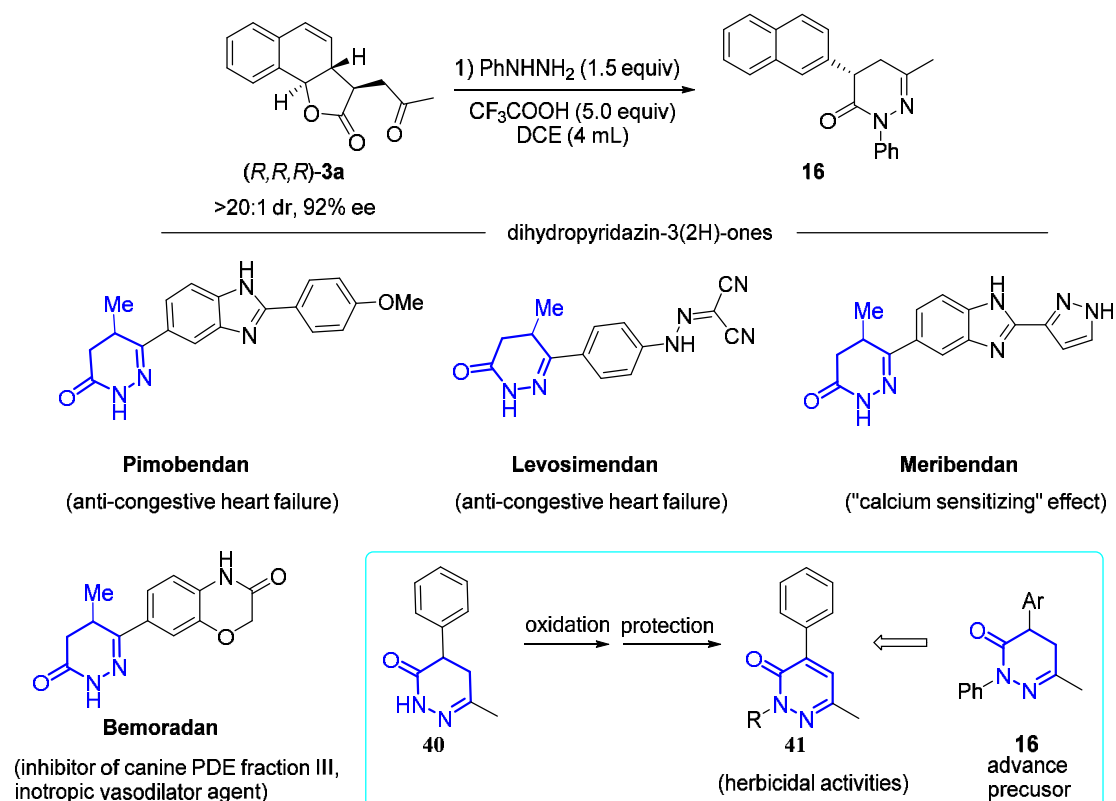

A solution of (*R,R,R*)-**3a** (24.2 mg, 0.1 mmol, 1.0 equiv), phenylhydrazine (15  $\mu$ L, 0.15 mmol), and trifluoroacetic acid (38  $\mu$ L, 0.5 mmol) in DCE (5.0 mL) was allowed to react under an argon atmosphere at 40  $^{\circ}$ C for 16 h, and then cooled to RT. The reaction was extracted with ethyl acetate (2  $\times$  20 mL) and then washed with brine, dried over Na<sub>2</sub>SO<sub>4</sub> and concentrated in vacuum. The crude product was purified by flash column chromatography on silica gel to yield the pure product **16** as white liquid (29.3 mg, 93% yield, 86% ee).<sup>30</sup>

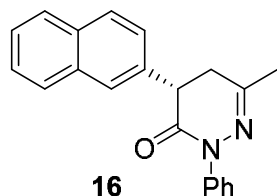

<sup>1</sup>H NMR (500 MHz, CDCl<sub>3</sub>)  $\delta$  7.85-7.76 (m, 3H), 7.68 (d, *J* = 1.9 Hz, 1H), 7.58-7.52 (m, 2H), 7.50-7.43 (m, 2H), 7.43-7.36 (m, 3H), 7.28-7.22 (m, 1H), 4.04 (t, *J* = 7.3 Hz, 1H), 2.97 (qdd, *J* = 17.0, 7.3, 1.7 Hz, 2H), 2.13 (s, 3H);

<sup>13</sup>C NMR (126 MHz, CDCl<sub>3</sub>)  $\delta$  165.8, 153.9, 141.1, 134.8, 133.3, 132.7, 128.7, 128.6, 128.6, 127.8, 127.6, 126.7, 126.6, 126.3, 126.2, 126.0, 125.6, 125.0, 43.4, 33.9, 23.5;

**HRMS (ESI) m/z:** C<sub>21</sub>H<sub>19</sub>ON<sub>2</sub><sup>+</sup> calculated for [M+H]<sup>+</sup>: 319.1492, found: 319.1495;

**HPLC analysis:** Daicel CHIRALPAK<sup>®</sup> ID, *n*-hexane/*i*-PrOH = 80/20, flow rate =

1.0 mL/min, λ = 254 nm, retention time: t<sub>major</sub> = 16.7 min, t<sub>minor</sub> = 40.3 min;

[α]<sub>D</sub><sup>25</sup> = -83.00 (c = 0.07, CHCl<sub>3</sub>).

### 6.3 Construction of fused dioxabicyclo[3.2.1]octanes.

The skeleton containing fused dioxabicyclo[3.2.1]octanes exists in the natural products cystophloroketals A-E,<sup>31</sup> bullataketal A, B,<sup>32</sup> falandiosides A.<sup>33</sup>

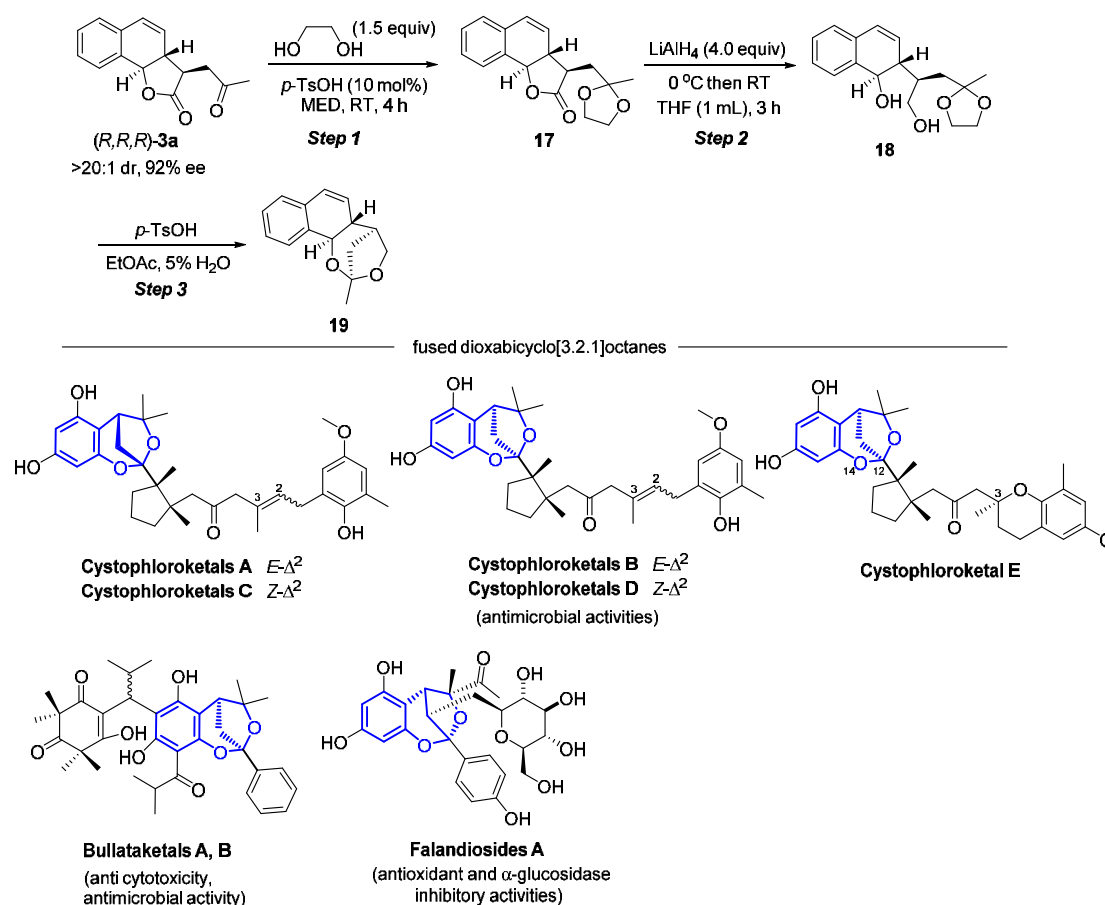

**Step 1:** (*R,R,R*)-**3a** (100 mg, 0.41 mmol, 1.0 equiv) were dissolved in 4 mL of 2-ethyl-2-methyl-1,3-dioxolane (MED) in a 25 mL flask, and catalytic amounts of *p*-toluenesulfonic acid (7 mg, 0.041 mmol, 10 mol%) and ethylene glycol (38.4 mg, 0.62 mmol, 1.5 eq) were added. The reaction was stirred overnight at room temperature. Then, the mixture was neutralized with 0.1 mL of triethylamine to

eliminate the excess acid; then, 20 mL of aqueous Na<sub>2</sub>CO<sub>3</sub> was added and extracted three times with 20 mL of ethyl acetate. The organic layers were combined and dried with anhydrous Na<sub>2</sub>SO<sub>4</sub>, and the solvent was evaporated under reduced pressure. The products were purified by column chromatography to give the ketal derivatives **17** (88 mg, 75% yield, 90% ee).<sup>34</sup>

**Step 2:** To a solution of **17** (28.6 mg, 0.1 mmol, 1.0 equiv) in THF (1 mL) at 0 °C was added LiAlH<sub>4</sub> (15 mg, 0.4 mmol). The mixture was stirred at room temperature for 3 h, then H<sub>2</sub>O (1 mL) was added carefully. The aqueous layer was extracted with CH<sub>2</sub>Cl<sub>2</sub> (3 × 20 mL). The combined organics were then dried (NaSO<sub>4</sub>) and concentrated in vacuo. The residue was purified by flash column chromatography to give the product **18** (27.6 mg, 95% yield, >20:1 dr, 89% ee).<sup>35</sup>

**Step 3:** The **18** (29 mg, 0.1 mmol, 1.0 equiv) was dissolved in 1.0 mL of ethyl acetate, and a catalytic amount of *p*-TsOH (32.6 mg, 0.1 mmol, 10 mol%) was added. Then, 50 μL of distilled water was added. The mixture was stirred overnight at room temperature. The crude product was extracted three times with ethyl acetate, dried with anhydrous Na<sub>2</sub>SO<sub>4</sub>, and evaporated under reduced pressure. The products were purified by flash column chromatography on silica gel to yield the pure product **19** (12.6 mg, 55% yield, 11:1 dr, 89% ee).<sup>34</sup>

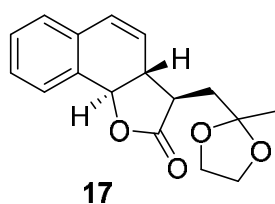

<sup>1</sup>H NMR (500 MHz, CDCl<sub>3</sub>) δ 7.45 (dd, *J* = 5.2, 3.5 Hz, 1H), 7.34 – 7.27 (m, 2H), 7.23 – 7.16 (m, 1H), 6.58 (dd, *J* = 9.5, 2.9 Hz, 1H), 6.43 (dd, *J* = 9.5, 2.2 Hz, 1H), 4.95 (d, *J* = 14.2 Hz, 1H), 4.07 – 3.93 (m, 4H), 2.79 (ddd, *J* = 12.7, 8.3, 3.0 Hz, 1H), 2.70 (ddt, *J* = 15.0, 12.5, 2.5 Hz, 1H), 2.57 (dd, *J* = 14.9, 2.9 Hz, 1H), 1.84 (dd, *J* = 15.0, 8.3 Hz, 1H), 1.41 (s, 3H);

<sup>13</sup>C NMR (126 MHz, CDCl<sub>3</sub>) δ 178.5, 134.3, 132.4, 129.2, 127.9, 127.8, 127.2, 126.8,

121.6, 108.8, 80.4, 64.6, 64.3, 47.8, 41.6, 38.4, 23.9;

**HPLC analysis:** Daicel CHIRALPAK<sup>®</sup> ID, *n*-hexane/*i*-PrOH = 80/20, flow rate = 1.0 mL/min,  $\lambda$  = 254 nm, retention time:  $t_{\text{major}}$  = 9.5 min,  $t_{\text{minor}}$  = 11.8 min;

**HRMS (ESI) m/z:**  $[M+Na]^+$  calculated for  $C_{17}H_{18}O_4^+$ : 309.1097, found: 309.1102;

$[\alpha]_D^{25}$  = -18.95 ( $c$  = 0.08,  $CHCl_3$ ).

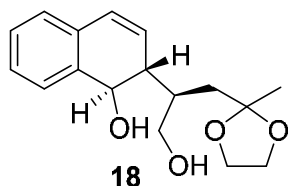

**<sup>1</sup>H NMR (600 MHz, CDCl<sub>3</sub>)**  $\delta$  7.48 – 7.39 (m, 1H), 7.21 – 7.11 (m, 2H), 6.98 (dd,  $J$  = 7.0, 1.7 Hz, 1H), 6.44 (dd,  $J$  = 9.8, 2.5 Hz, 1H), 5.73 (dd,  $J$  = 9.7, 3.3 Hz, 1H), 4.69 (d,  $J$  = 9.9 Hz, 1H), 3.99 – 3.86 (m, 4H), 3.52 (qd,  $J$  = 10.6, 6.4 Hz, 2H), 2.92 (d,  $J$  = 25.0 Hz, 2H), 2.62 (dtd,  $J$  = 9.6, 3.5, 2.5 Hz, 1H), 2.07 (dt,  $J$  = 9.6, 3.6 Hz, 1H), 1.92 (dt,  $J$  = 15.3, 2.9 Hz, 1H), 1.73 (ddd,  $J$  = 15.3, 7.3, 2.7 Hz, 1H), 1.25 (s, 3H);

**<sup>13</sup>C NMR (151 MHz, CDCl<sub>3</sub>)**  $\delta$  137.4, 132.6, 128.6, 128.6, 128.0, 127.8, 127.6, 126.0, 125.3, 110.2, 65.3, 65.3, 64.6, 64.3, 45.2, 45.2, 37.7, 36.2, 36.1, 23.7;

**HPLC analysis:** Daicel CHIRALPAK<sup>®</sup> OD-H, *n*-hexane/*i*-PrOH = 70/30, flow rate = 1.0 mL/min,  $\lambda$  = 254 nm, retention time:  $t_{\text{minor}}$  = 11.0 min,  $t_{\text{major}}$  = 13.0 min;

**HRMS (ESI) m/z:**  $[M+Na]^+$  calculated for  $C_{17}H_{22}O_4Na^+$ : 313.1410, found: 313.1410;

$[\alpha]_D^{25}$  = +130.57 ( $c$  = 0.07,  $CHCl_3$ ).

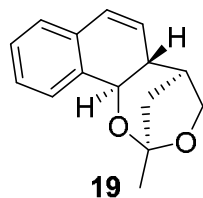

**<sup>1</sup>H NMR (500 MHz, CDCl<sub>3</sub>)**  $\delta$  7.45 (d,  $J$  = 7.4 Hz, 1H), 7.26 – 7.18 (m, 2H), 7.08 (dd,  $J$  = 7.4, 1.5 Hz, 1H), 6.54 (dd,  $J$  = 9.5, 3.0 Hz, 1H), 5.79 (dd,  $J$  = 9.5, 2.3 Hz, 1H), 4.77 (d,  $J$  = 14.5 Hz, 1H), 4.24 (d,  $J$  = 8.2 Hz, 1H), 3.98 (ddd,  $J$  = 8.2, 4.1, 1.3 Hz, 1H), 2.61 (dq,  $J$  = 4.0, 1.9 Hz, 1H), 2.44 (dq,  $J$  = 14.6, 1.5 Hz, 1H), 1.91 – 1.88 (m, 2H), 1.61 (s, 3H);

$^{13}\text{C}$  NMR (126 MHz,  $\text{CDCl}_3$ )  $\delta$  138.0, 132.7, 130.32, 129.6, 127.6, 126.6, 125.8, 121.7, 106.0, 72.3, 70.6, 43.1, 42.2, 38.4, 23.3;

**HPLC analysis:** Daicel CHIRALPAK<sup>®</sup> OD-H, *n*-hexane/*i*-PrOH = 98/2, flow rate = 1.0 mL/min,  $\lambda$  = 254 nm, retention time:  $t_{\text{minor}}$  = 5.4 min,  $t_{\text{major}}$  = 6.3 min;

**HRMS (ESI) m/z:**  $[\text{M}+\text{Na}]^+$  calculated for  $\text{C}_{15}\text{H}_{16}\text{O}_2\text{Na}^+$ : 251.1043, found: 251.1042;  $[\alpha]_{\text{D}}^{25}$  = +88.70 ( $c$  = 0.1,  $\text{CHCl}_3$ ).

#### 6.4 Late-stage $\text{C}\alpha$ functionalization of $\gamma$ -lactone for quaternary stereocenters

Upon protection of the ketone carbonyl group in product **3a**, we treated it with a series of electrophiles under basic conditions, affording products bearing a quaternary carbon at the  $\text{C}\alpha$ -position. The structure of terpenoid tricyclic  $\gamma$ -lactones bearing all-carbon quaternary stereocenter (**IV**) widely present in various natural products and has a wide range of biological activities.<sup>36</sup> Such as artemiprincepsolides D-F,<sup>37</sup> tetrachyrin,<sup>38</sup> rosenonolactones, desoxyrosenonolactone, rosololactone,<sup>39</sup> vlasouliolide D/H<sup>34</sup>, borneolactone B,<sup>40</sup> coleon A lactone<sup>41</sup>, BE-42472B,<sup>42</sup> lysidice E,<sup>43</sup> and tricyclic core of galanthamine.<sup>44</sup>

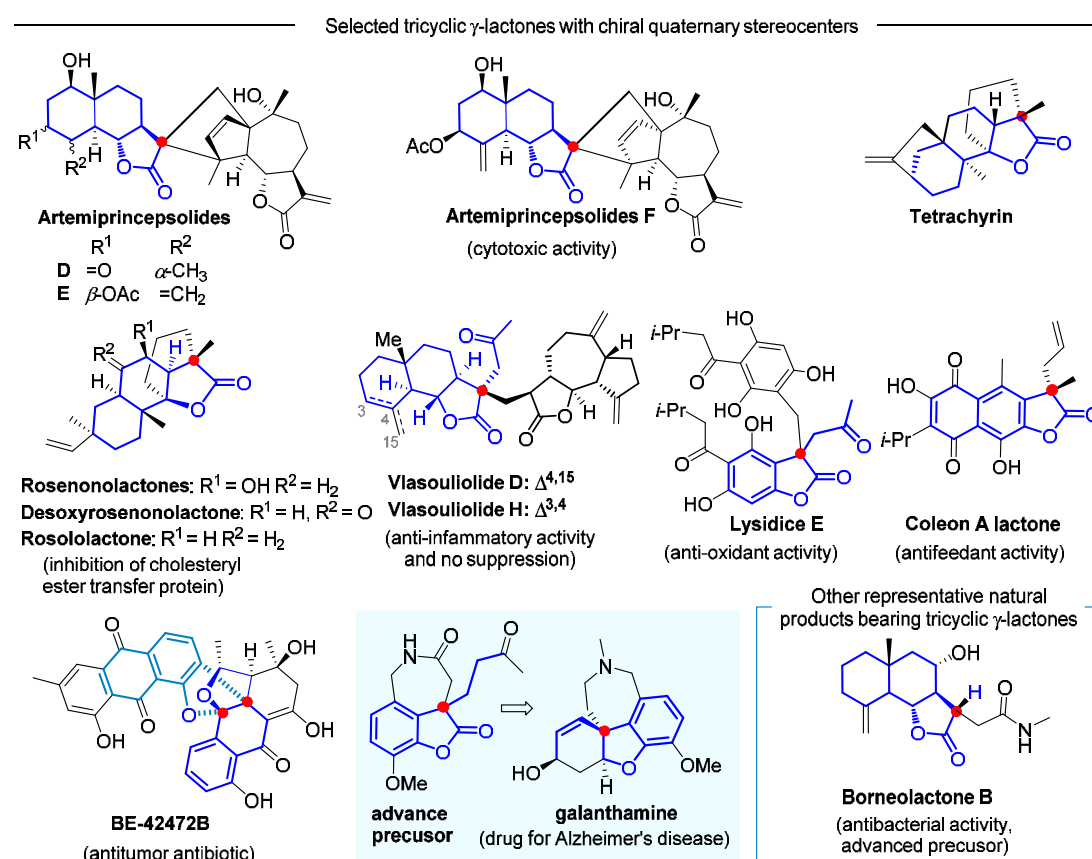

**Figure S12.** Representative natural products bearing tricyclic  $\gamma$ -lactones.

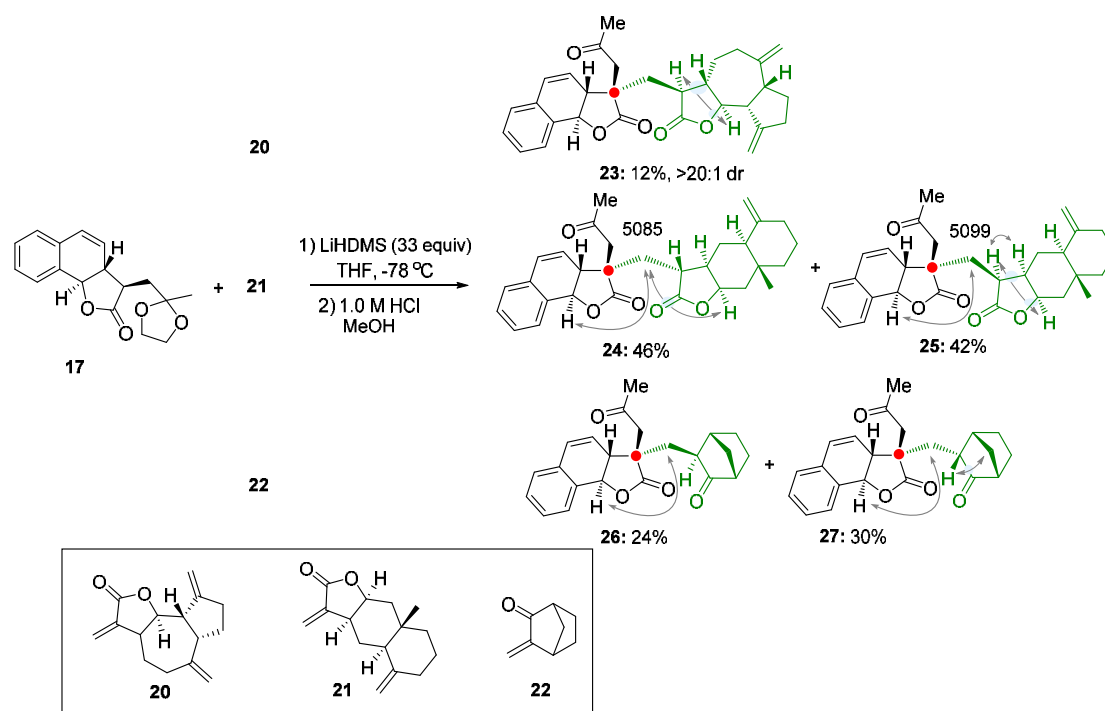

The ketal derivative (0.1 mmol) was dissolved in 1 mL of dry tetrahydrofuran (THF), and carried out under a nitrogen atmosphere and at  $-78\text{ }^\circ\text{C}$ . After reaching this temperature, 33 equiv of LiHDMS was slowly added to the mixture and allowed to react for 30 min. After the enolate was formed, 1.0 equiv of the second monomer **20**, **21** and **22** (dissolved in THF) was added and the mixture was stirred at  $-78\text{ }^\circ\text{C}$  for 2 h. Then, aqueous  $\text{NH}_4\text{Cl}$  was added to quench the reaction and warm to room temperature. The solution was extracted with ethyl acetate (EA) for three times. The organic layer was combined, washed with brine, dried with  $\text{Na}_2\text{SO}_4$  and concentrated in vacuum. The residue was then purified by column chromatography to give the corresponding product.

And then the product (0.1 mmol) was dissolved in 20 mL of methanol in a 50 mL flask, 5 mL of 1.0 M HCl was added. The mixture was stirred overnight at room temperature. The crude product was extracted three times with ethyl acetate, dried with anhydrous  $\text{Na}_2\text{SO}_4$ , and evaporated under reduced pressure. The products were purified by HPLC and can be obtained with quantitative yield.<sup>34</sup>

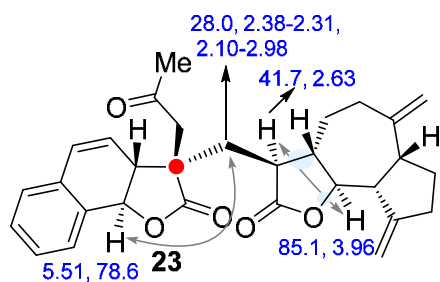

White solid, 5.7 mg, 12% yield, >20:1 dr;

$^1\text{H}$  NMR (600 MHz,  $\text{CDCl}_3$ )  $\delta$  7.49 (dt,  $J = 7.2, 1.4$  Hz, 1H), 7.32 – 7.26 (m, 2H), 7.16 (dd,  $J = 7.1, 1.6$  Hz, 1H), 6.59 (dd,  $J = 9.6, 3.1$  Hz, 1H), 6.42 (dd,  $J = 9.6, 2.4$  Hz, 1H), 5.51 (d,  $J = 14.7$  Hz, 1H), 5.15 (q,  $J = 2.4$  Hz, 1H), 5.04 (q,  $J = 2.3$  Hz, 1H), 4.89 (d,  $J = 1.3$  Hz, 1H), 4.79 (d,  $J = 1.3$  Hz, 1H), 3.96 (t,  $J = 9.4$  Hz, 1H), 3.14 (dt,  $J = 14.7, 2.7$  Hz, 1H), 3.08 (d,  $J = 18.5$  Hz, 1H), 2.84 (td,  $J = 8.2, 4.5$  Hz, 1H), 2.80 – 2.70 (m, 2H), 2.63 (ddd,  $J = 12.3, 8.7, 1.3$  Hz, 1H), 2.57 – 2.44 (m, 3H), 2.38 – 2.31 (m, 1H), 2.16 (s, 3H), 2.10 – 1.98 (m, 4H), 1.97 – 1.90 (m, 1H), 1.85 (dddd,  $J = 13.2, 8.8, 5.7, 4.4$  Hz, 1H), 1.39 – 1.33 (m, 1H);

$^{13}\text{C}$  NMR (151 MHz,  $\text{CDCl}_3$ )  $\delta$  205.7, 178.9, 177.9, 151.4, 149.5, 134.4, 132.0, 130.4, 128.1, 127.7, 126.6, 125.0, 122.0, 112.1, 109.3, 85.1, 78.6, 51.8, 50.1, 48.7, 47.4, 47.0, 46.4, 41.7, 37.6, 32.4, 32.3, 31.1, 30.1, 28.0;

HRMS (ESI)  $m/z$ :  $[\text{M}+\text{H}]^+$  calculated for  $\text{C}_{30}\text{H}_{33}\text{O}_5^+$ : 473.2323, found: 473.2330;

$[\alpha]_{\text{D}}^{25} = -20.50$  ( $c = 0.07$ ,  $\text{CHCl}_3$ ).

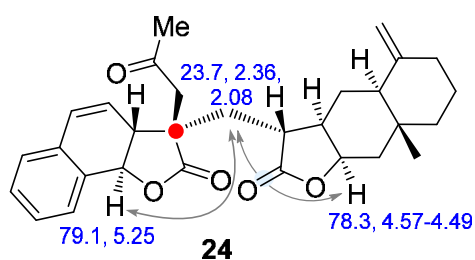

White solid, 20.8 mg, 46% yield;

$^1\text{H}$  NMR (600 MHz,  $\text{CDCl}_3$ )  $\delta$  7.48 – 7.42 (m, 1H), 7.34 – 7.27 (m, 2H), 7.21 – 7.16 (m, 1H), 6.62 (dd,  $J = 9.6, 3.1$  Hz, 1H), 6.45 (dd,  $J = 9.5, 2.5$  Hz, 1H), 5.25 (d,  $J = 14.8$  Hz, 1H), 4.73 (q,  $J = 1.6$  Hz, 1H), 4.57 – 4.49 (m, 1H), 4.38 (q,  $J = 1.6$  Hz, 1H), 3.35 (dt,  $J = 14.8, 2.8$  Hz, 1H), 3.14 (d,  $J = 18.7$  Hz, 1H), 3.08 (td,  $J = 6.7, 4.2$  Hz, 1H), 2.88 (d,  $J = 18.7$  Hz, 1H), 2.52 (dtd,  $J = 12.3, 6.1, 4.0$  Hz, 1H), 2.36 (dd,  $J = 15.3,$

4.2 Hz, 1H), 2.30 (dt,  $J = 13.2, 2.2$  Hz, 1H), 2.23 – 2.11 (m, 4H), 2.08 (dd,  $J = 15.3, 6.9$  Hz, 1H), 1.97 (td,  $J = 12.8, 5.6$  Hz, 1H), 1.80 – 1.75 (m, 1H), 1.53 (ddd,  $J = 13.5, 11.3, 4.0$  Hz, 2H), 1.49 – 1.41 (m, 2H), 1.23 (td,  $J = 13.3, 4.9$  Hz, 2H), 1.09 (q,  $J = 12.6$  Hz, 1H), 0.77 (s, 3H);

$^{13}\text{C}$  NMR (151 MHz,  $\text{CDCl}_3$ )  $\delta$  205.1, 179.2, 178.4, 149.1, 134.2, 132.2, 130.3, 128.1, 127.9, 126.9, 124.8, 121.6, 106.5, 79.1, 78.3, 48.9, 46.4, 46.3, 45.8, 42.6, 42.1, 41.4, 39.6, 36.7, 34.8, 30.6, 23.7, 22.6, 21.5, 17.7;

HRMS (ESI)  $m/z$ :  $[\text{M}+\text{Na}]^+$  calculated for  $\text{C}_{30}\text{H}_{34}\text{O}_5\text{Na}^+$ : 497.2298, found: 497.2298;

$[\alpha]_{\text{D}}^{25} = +4.5$  ( $c = 0.07$ ,  $\text{CHCl}_3$ ).

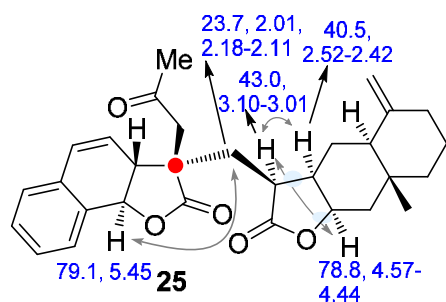

White solid, 20.8 mg, 42% yield;

$^1\text{H}$  NMR (600 MHz,  $\text{CDCl}_3$ )  $\delta$  7.49 – 7.42 (m, 1H), 7.34 – 7.26 (m, 2H), 7.20 – 7.14 (m, 1H), 6.61 (dd,  $J = 9.6, 3.1$  Hz, 1H), 6.43 (dd,  $J = 9.5, 2.4$  Hz, 1H), 5.45 (d,  $J = 14.7$  Hz, 1H), 4.81 (q,  $J = 1.6$  Hz, 1H), 4.57 – 4.44 (m, 2H), 3.19 (dt,  $J = 14.8, 2.8$  Hz, 1H), 3.10 – 3.01 (m, 2H), 2.80 (d,  $J = 18.4$  Hz, 1H), 2.52 – 2.42 (m, 2H), 2.35 (ddt,  $J = 13.1, 4.4, 2.0$  Hz, 1H), 2.18 – 2.11 (m, 4H), 2.01 (td,  $J = 12.7, 5.8$  Hz, 1H), 1.84 – 1.78 (m, 1H), 1.59 – 1.52 (m, 4H), 1.51 – 1.44 (m, 1H), 1.29 – 1.20 (m, 2H), 1.10 (q,  $J = 12.6$  Hz, 1H), 0.78 (s, 3H);

$^{13}\text{C}$  NMR (126 MHz,  $\text{CDCl}_3$ )  $\delta$  205.2, 178.9, 177.9, 149.1, 134.3, 132.0, 130.4, 128.1, 127.8, 126.9, 124.8, 121.7, 106.6, 79.1, 77.8, 49.7, 47.6, 46.6, 43.0, 42.1, 41.4, 40.5, 36.7, 34.8, 30.9, 23.7, 22.6, 21.6, 17.7;

HRMS (ESI)  $m/z$ :  $[\text{M}+\text{Na}]^+$  calculated for  $\text{C}_{30}\text{H}_{34}\text{O}_5\text{Na}^+$ : 497.2298, found: 497.2297;

$[\alpha]_{\text{D}}^{25} = -3.9$  ( $c = 0.1$ ,  $\text{CHCl}_3$ ).

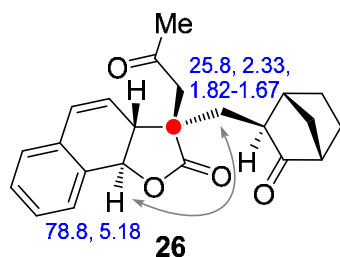

White solid, 9.8 mg, 24% yield;

**<sup>1</sup>H NMR (500 MHz, CDCl<sub>3</sub>)** δ 7.40 (m, 1H), 7.31 – 7.26 (m, 2H), 7.16 (dd, *J* = 7.0, 1.8 Hz, 1H), 6.58 (dd, *J* = 9.6, 3.0 Hz, 1H), 6.47 (dd, *J* = 9.6, 2.4 Hz, 1H), 5.37 (d, *J* = 14.8 Hz, 1H), 3.16 (d, *J* = 18.7 Hz, 1H), 3.11 (dt, *J* = 14.8, 2.8 Hz, 1H), 2.75 (d, *J* = 18.7 Hz, 1H), 2.67 (dq, *J* = 4.5, 2.1 Hz, 1H), 2.64 (d, *J* = 4.9 Hz, 1H), 2.32 (dd, *J* = 8.8, 4.1 Hz, 1H), 2.26 (dd, *J* = 15.2, 3.2 Hz, 1H), 2.15 (s, 3H), 1.90 (dd, *J* = 15.2, 9.1 Hz, 1H), 1.83 (tt, *J* = 12.5, 4.8 Hz, 1H), 1.77 (dp, *J* = 10.4, 2.0 Hz, 1H), 1.67 – 1.60 (m, 2H), 1.55 (ddt, *J* = 11.1, 4.7, 2.3 Hz, 1H), 1.38 (dddd, *J* = 13.3, 9.0, 4.7, 2.1 Hz, 1H);

**<sup>13</sup>C NMR (151 MHz, CDCl<sub>3</sub>)** δ 219.2, 205.4, 179.2, 134.4, 132.2, 130.0, 128.0, 127.8, 126.83, 125.3, 121.6, 78.8, 50.2, 49.1, 48.9, 46.8, 46.1, 40.2, 37.2, 30.6, 25.9, 25.8, 21.4;

**HRMS (ESI) *m/z*:** [M+Na]<sup>+</sup> calculated for C<sub>23</sub>H<sub>24</sub>O<sub>4</sub>Na<sup>+</sup>: 387.1567, found: 387.1568;

[α]<sub>D</sub><sup>25</sup> = -40.72 (*c* = 0.083, CHCl<sub>3</sub>).

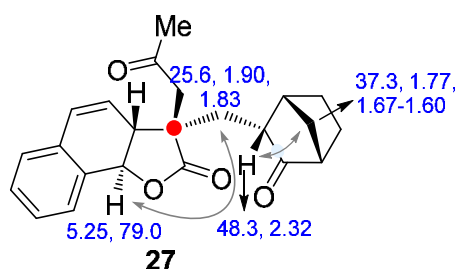

White solid, 9.8 mg, 30% yield;

**<sup>1</sup>H NMR (600 MHz, CDCl<sub>3</sub>)** δ 7.47 – 7.40 (m, 1H), 7.31 – 7.26 (m, 2H), 7.16 (dd, *J* = 7.0, 1.8 Hz, 1H), 6.58 (dd, *J* = 9.6, 3.0 Hz, 1H), 6.47 (dd, *J* = 9.6, 2.4 Hz, 1H), 5.37 (d, *J* = 14.8 Hz, 1H), 3.16 (d, *J* = 18.7 Hz, 1H), 3.11 (dt, *J* = 14.8, 2.8 Hz, 1H), 2.75 (d, *J* = 18.7 Hz, 1H), 2.67 (dq, *J* = 4.5, 2.1 Hz, 1H), 2.64 (d, *J* = 4.9 Hz, 1H), 2.32 (dd, *J* = 8.8, 4.1 Hz, 1H), 2.26 (dd, *J* = 15.2, 3.2 Hz, 1H), 2.15 (s, 3H), 1.90 (dd, *J* = 15.2,

9.1 Hz, 1H), 1.83 (tt,  $J = 12.5, 4.8$  Hz, 1H), 1.77 (dp,  $J = 10.4, 2.0$  Hz, 1H), 1.67 – 1.60 (m, 2H), 1.55 (ddt,  $J = 11.1, 4.7, 2.3$  Hz, 1H), 1.38 (dddd,  $J = 13.3, 9.0, 4.7, 2.1$  Hz, 1H);

$^{13}\text{C}$  NMR (151 MHz,  $\text{CDCl}_3$ )  $\delta$  218.1, 205.4, 179.0, 134.6, 132.2, 130.0, 128.0, 127.8, 126.81, 125.5, 121.6, 79.0, 50.2, 50.1, 49.4, 48.3, 46.9, 40.2, 37.3, 30.8, 25.6, 25.2, 21.2;

HRMS (ESI)  $m/z$ :  $[\text{M}+\text{Na}]^+$  calculated for  $\text{C}_{23}\text{H}_{24}\text{O}_4\text{Na}^+$ : 387.1567, found: 387.1567;

$[\alpha]_{\text{D}}^{25} = +39.52$  ( $c = 0.083, \text{CHCl}_3$ ).

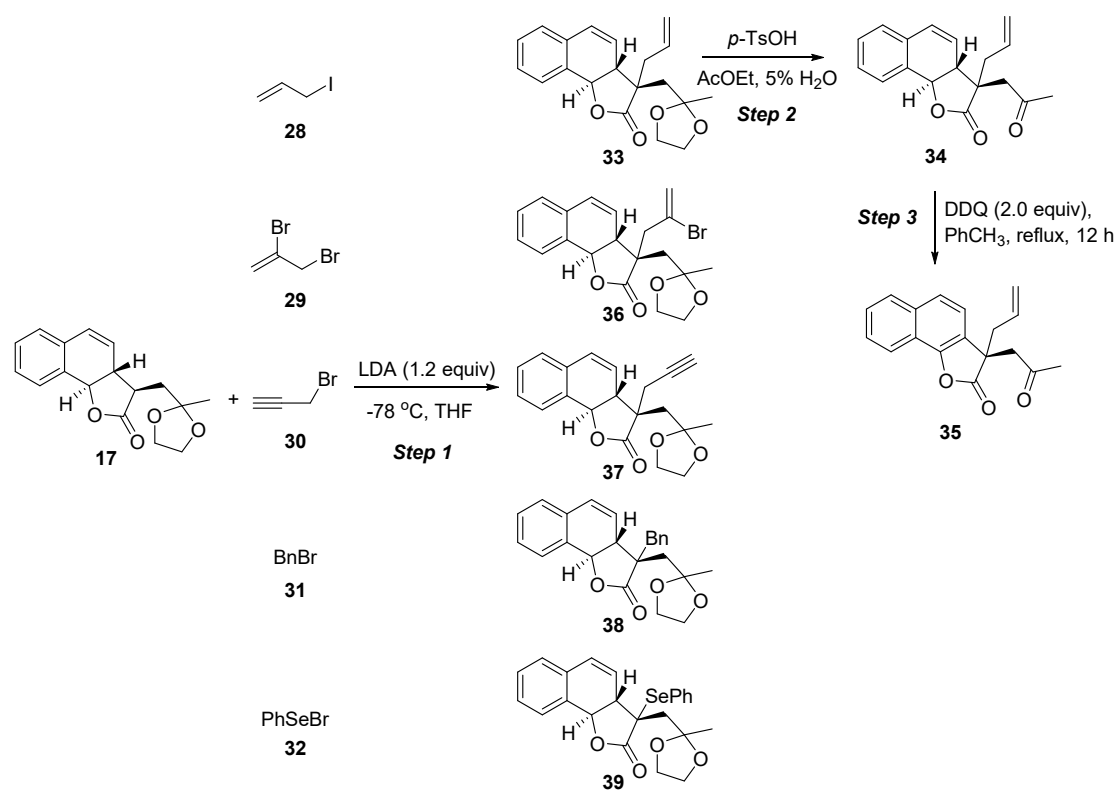

**Step 1:** A solution of freshly prepared lithium diisopropylamide (1.2 equiv.; 1.0 M in anhydrous THF) was added dropwise to the ketal derivatives (1.0 equiv) in THF (0.1 M) under  $-78\text{ }^\circ\text{C}$  and Ar protection. The whole reaction was stirred for 1 h before the addition of electrophile (1.2 equiv) dissolved with few THF. When the starting material was full consumed monitored by TLC, aqueous  $\text{NH}_4\text{Cl}$  was added to quench the reaction and warm to room temperature. The solution was extracted with ethyl acetate (EA) for three times. The organic layer was combined, washed with brine, dried with  $\text{Na}_2\text{SO}_4$  and concentrated in vacuum. The residue was then purified by

column chromatography to give the product.<sup>45</sup>

**Step 2:** The **33** (32.6 mg, 0.1 mmol, 1.0 equiv) was dissolved in 0.95 mL of ethyl acetate, and a catalytic amount of *p*-TsOH (32.6 mg, 0.1 mmol, 20 mol%) was added. Then, 50  $\mu$ L of distilled water was added. The mixture was stirred overnight at room temperature. The crude product was extracted three times with ethyl acetate, dried with anhydrous Na<sub>2</sub>SO<sub>4</sub>, and evaporated under reduced pressure. The products were purified by flash column chromatography on silica gel to yield the pure product **34** (21.2 mg, 75% yield, 90% ee).<sup>34</sup>

**Step 3:** To a flame-dried and N<sub>2</sub>-purged schlenk tube were added **34** (28.2 mg, 0.1 mmol, 1.0 equiv) and DDQ (45.4 mg, 0.2 mmol, 2.0 equiv). The vial was then sealed, purged and backfilled with N<sub>2</sub> three times before adding toluene (1.0 mL) at room temperature. The resulting mixture was reflux for 12 hours. After concentrated under reduced pressure, the residue was purified by column chromatography on silica gel to give **35** (23 mg, 82% yield, 89% ee).<sup>46</sup>

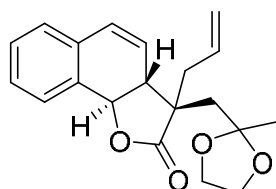

Compound **33**: 55% yield, 20:1 dr, 90% ee.

**<sup>1</sup>H NMR (500 MHz, CDCl<sub>3</sub>)**  $\delta$  7.51-7.38 (m, 1H), 7.33-7.27 (m, 2H), 7.21-7.13 (m, 1H), 6.58 (dd, *J* = 9.5, 3.1 Hz, 1H), 6.23 (dd, *J* = 9.5, 2.5 Hz, 1H), 5.91 (dddd, *J* = 16.9, 10.3, 8.1, 6.7 Hz, 1H), 5.28 (d, *J* = 15.0 Hz, 1H), 5.23-5.12 (m, 2H), 3.94-3.84 (m, 2H), 3.83-3.75 (m, 2H), 3.45 (dt, *J* = 15.0, 2.8 Hz, 1H), 2.56 (ddt, *J* = 14.3, 6.7, 1.4 Hz, 1H), 2.44 (ddt, *J* = 14.2, 8.2, 1.1 Hz, 1H), 2.32 (d, *J* = 15.3 Hz, 1H), 2.11 (d, *J* = 15.3 Hz, 1H), 1.28 (s, 3H);

**<sup>13</sup>C NMR (126 MHz, CDCl<sub>3</sub>)**  $\delta$  179.3, 135.0, 132.4, 132.3, 129.5, 127.9, 127.6, 126.9, 125.3, 121.6, 119.6, 108.7, 78.3, 64.1, 63.7, 47.3, 46.6, 41.8, 36.4, 25.8;

**HPLC analysis:** Daicel CHIRALPAK<sup>®</sup> ID, *n*-hexane/*i*-PrOH = 80/20, flow rate =

1.0 mL/min,  $\lambda = 254$  nm, retention time:  $t_{\text{major}} = 9.0$  min,  $t_{\text{minor}} = 10.6$  min;

**HRMS (ESI) m/z:**  $[M+Na]^+$  calculated for  $C_{20}H_{22}O_4Na^+$ : 349.1410, found: 349.1415;

$[\alpha]_D^{25} = -0.60$  ( $c = 0.1$ ,  $CHCl_3$ ).

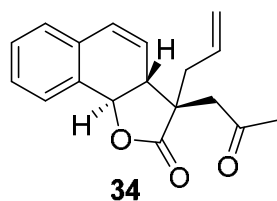

Compound **34**: 75% yield, 20:1 dr, 90% ee.

**$^1H$  NMR (500 MHz,  $CDCl_3$ )**  $\delta$  7.43 – 7.31 (m, 1H), 7.25 – 7.16 (m, 2H), 7.12 – 7.05 (m, 1H), 6.49 (dd,  $J = 9.6, 3.1$  Hz, 1H), 6.42 (dd,  $J = 9.6, 2.4$  Hz, 1H), 5.80 (dddd,  $J = 16.7, 10.1, 8.4, 6.6$  Hz, 1H), 5.21 (d,  $J = 14.8$  Hz, 1H), 5.16 – 5.06 (m, 2H), 3.11 (dt,  $J = 14.9, 2.7$  Hz, 1H), 3.02 (d,  $J = 18.6$  Hz, 1H), 2.63 (d,  $J = 18.6$  Hz, 1H), 2.57 – 2.47 (m, 2H), 2.05 (s, 3H);

**$^{13}C$  NMR (126 MHz,  $CDCl_3$ )**  $\delta$  205.4, 178.7, 134.5, 132.1, 129.7, 127.9, 127.7, 126.8, 125.6, 121.5, 119.8, 78.8, 48.9, 47.1, 33.8, 30.7;

**HPLC analysis:** Daicel CHIRALCEL<sup>®</sup> OD-H, *n*-hexane/*i*-PrOH = 95/5, flow rate = 1.0 mL/min,  $\lambda = 254$  nm, retention time:  $t_{\text{minor}} = 14.9$  min,  $t_{\text{major}} = 17.1$  min;

**HRMS (ESI) m/z:**  $[M+Na]^+$  calculated for  $C_{18}H_{18}O_3Na^+$ : 305.1148, found: 305.1151;  
 $[\alpha]_D^{25} = +52.71$  ( $c = 0.07$ ,  $CHCl_3$ ).

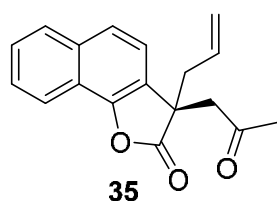

Compound **35**: 82% yield, 20:1 dr, 89% ee.

**$^1H$  NMR (500 MHz,  $CDCl_3$ )**  $\delta$  8.06 – 7.97 (m, 1H), 7.76 (d,  $J = 8.1$  Hz, 1H), 7.55 (d,  $J = 8.3$  Hz, 1H), 7.45 (dddd,  $J = 24.7, 8.2, 6.8, 1.3$  Hz, 2H), 7.16 (d,  $J = 8.3$  Hz, 1H), 5.49 – 5.35 (m, 1H), 5.05 – 4.90 (m, 2H), 3.28 – 3.09 (m, 2H), 2.60 – 2.44 (m, 2H), 1.95 (s, 3H);

**$^{13}C$  NMR (126 MHz,  $CDCl_3$ )**  $\delta$  203.6, 179.4, 149.2, 134.0, 130.4, 128.0, 126.6, 126.6,

123.9, 123.3, 121.5, 120.6, 119.8, 119.2, 49.8, 49.3, 42.4, 29.6;

**HPLC analysis:** Daicel CHIRALPAK<sup>®</sup> AS-H, *n*-hexane/*i*-PrOH = 70/30, flow rate = 1.0 mL/min,  $\lambda$  = 254 nm, retention time:  $t_{\text{minor}}$  = 7.4 min,  $t_{\text{major}}$  = 9.0 min;

**HRMS (ESI) m/z:**  $[M+Na]^+$  calculated for  $C_{18}H_{16}O_3Na^+$ : 303.0992, found: 303.0991;  
 $[\alpha]_D^{25}$  = -41.10 ( $c$  = 0.08,  $CHCl_3$ ).

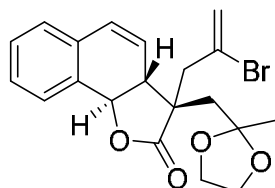

Compound **36**: 22% yield, 20:1 dr, 89% ee.

**<sup>1</sup>H NMR (500 MHz, CDCl<sub>3</sub>)**  $\delta$  7.46 (dt,  $J$  = 6.9, 1.2 Hz, 1H), 7.33 – 7.27 (m, 2H), 7.21 – 7.16 (m, 1H), 6.58 (dd,  $J$  = 9.5, 3.1 Hz, 1H), 6.21 (dd,  $J$  = 9.5, 2.5 Hz, 1H), 5.83 (d,  $J$  = 1.8 Hz, 1H), 5.68 (d,  $J$  = 1.9 Hz, 1H), 5.35 (d,  $J$  = 14.9 Hz, 1H), 3.98 – 3.79 (m, 4H), 3.46 (dt,  $J$  = 15.0, 2.8 Hz, 1H), 3.09 – 2.95 (m, 2H), 2.39 (s, 2H), 1.30 (s, 3H);

**<sup>13</sup>C NMR (126 MHz, CDCl<sub>3</sub>)**  $\delta$  178.6, 134.8, 132.2, 129.6, 128.0, 127.7, 126.9, 126.9, 125.1, 123.0, 121.8, 108.8, 78.4, 63.9, 63.7, 47.8, 47.6, 43.5, 42.3, 25.7;

**HPLC analysis:** Daicel CHIRALPAK<sup>®</sup> ID, *n*-hexane/*i*-PrOH = 80/20, flow rate = 1.0 mL/min,  $\lambda$  = 254 nm, retention time:  $t_{\text{major}}$  = 11.3 min,  $t_{\text{minor}}$  = 14.2 min;

**HRMS (ESI) m/z:**  $[M+Na]^+$  calculated for  $C_{20}H_{21}O_4BrNa^+$ : 427.0515, found: 427.0522;

$[\alpha]_D^{25}$  = +17.86 ( $c$  = 0.07,  $CHCl_3$ ).

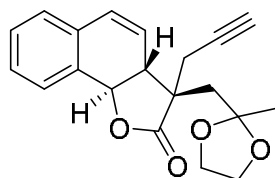

Compound **37**: 49% yield, 20:1 dr, 89% ee.

**<sup>1</sup>H NMR (500 MHz, CDCl<sub>3</sub>)**  $\delta$  7.49 – 7.42 (m, 1H), 7.33 – 7.27 (m, 2H), 7.22 – 7.17 (m, 1H), 6.59 (dd,  $J$  = 9.6, 3.1 Hz, 1H), 6.45 (dd,  $J$  = 9.6, 2.5 Hz, 1H), 5.28 (d,  $J$  =

15.0 Hz, 1H), 3.95 – 3.85 (m, 2H), 3.84 – 3.76 (m, 2H), 3.43 (dt,  $J = 15.1, 2.8$  Hz, 1H), 2.75 (dd,  $J = 17.1, 2.7$  Hz, 1H), 2.61 – 2.47 (m, 2H), 2.35 (d,  $J = 15.3$  Hz, 1H), 2.18 (t,  $J = 2.7$  Hz, 1H), 1.31 (s, 3H);

$^{13}\text{C}$  NMR (126 MHz,  $\text{CDCl}_3$ )  $\delta$  178.7, 134.7, 132.2, 129.5, 128.0, 127.7, 126.9, 124.9, 121.7, 108.5, 79.1, 78.5, 72.6, 64.2, 63.7, 46.5, 46.2, 41.6, 25.7, 21.8;

**HPLC analysis:** Daicel CHIRALPAK<sup>®</sup> ID, *n*-hexane/*i*-PrOH = 80/20, flow rate = 1.0 mL/min,  $\lambda = 254$  nm, retention time:  $t_{\text{major}} = 12.2$  min,  $t_{\text{minor}} = 13.8$  min;

**HRMS** (ESI)  $m/z$ :  $[\text{M}+\text{Na}]^+$  calculated for  $\text{C}_{20}\text{H}_{20}\text{O}_4\text{Na}^+$ : 347.1254, found: 347.1258;  $[\alpha]_{\text{D}}^{25} = +1.30$  ( $c = 0.1, \text{CHCl}_3$ ).

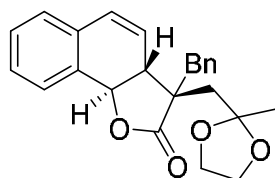

Compound **38**: 34% yield, 20:1 dr, 89% ee.

$^1\text{H}$  NMR (500 MHz,  $\text{CDCl}_3$ )  $\delta$  7.38 (dd,  $J = 5.3, 3.6$  Hz, 1H), 7.30 – 7.20 (m, 7H), 7.16 (dt,  $J = 4.4, 3.3$  Hz, 1H), 6.57 (dd,  $J = 9.5, 3.1$  Hz, 1H), 6.28 (dd,  $J = 9.5, 2.5$  Hz, 1H), 4.95 (d,  $J = 14.9$  Hz, 1H), 3.95 – 3.77 (m, 4H), 3.51 (dt,  $J = 15.1, 2.8$  Hz, 1H), 3.14 (d,  $J = 13.9$  Hz, 1H), 3.04 (d,  $J = 13.9$  Hz, 1H), 2.23 (s, 2H), 1.27 (s, 3H);

$^{13}\text{C}$  NMR (126 MHz,  $\text{CDCl}_3$ )  $\delta$  179.5, 135.8, 135.3, 132.3, 130.9, 129.2, 128.3, 127.8, 127.5, 127.1, 126.8, 125.7, 121.6, 108.8, 78.4, 64.0, 63.7, 48.9, 46.9, 42.9, 39.0, 25.8;

**HPLC analysis:** Daicel CHIRALPAK<sup>®</sup> ID, *n*-hexane/*i*-PrOH = 80/20, flow rate = 1.0 mL/min,  $\lambda = 254$  nm, retention time:  $t_{\text{major}} = 13.3$  min,  $t_{\text{minor}} = 15.1$  min;

**HRMS** (ESI)  $m/z$ :  $[\text{M}+\text{Na}]^+$  calculated for  $\text{C}_{24}\text{H}_{24}\text{O}_4\text{Na}^+$ : 399.1567, found: 399.1570;  $[\alpha]_{\text{D}}^{25} = -174.00$  ( $c = 0.07, \text{CHCl}_3$ ).

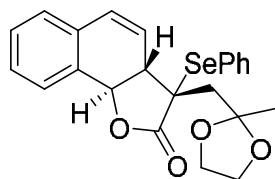

Compound **39**: 45% yield, 20:1 dr, 90% ee.

**<sup>1</sup>H NMR (500 MHz, CDCl<sub>3</sub>)** δ 7.60 (dd, *J* = 8.1, 1.4 Hz, 2H), 7.41 (dt, *J* = 7.0, 1.5 Hz, 1H), 7.38 – 7.34 (m, 1H), 7.30 – 7.20 (m, 4H), 7.16 – 7.12 (m, 1H), 6.58 (dd, *J* = 9.5, 3.0 Hz, 1H), 6.25 (dd, *J* = 9.4, 2.3 Hz, 1H), 5.50 (d, *J* = 14.5 Hz, 1H), 3.80 – 3.64 (m, 4H), 3.44 (dt, *J* = 14.4, 2.7 Hz, 1H), 2.48 (d, *J* = 15.1 Hz, 1H), 2.31 (d, *J* = 15.1 Hz, 1H), 1.17 (s, 3H);

**<sup>13</sup>C NMR (126 MHz, CDCl<sub>3</sub>)** δ 175.4, 138.3, 134.7, 132.4, 130.2, 129.9, 129.1, 128.0, 127.6, 127.1, 124.6, 124.1, 121.8, 108.6, 78.8, 64.3, 64.0, 49.3, 48.0, 43.4, 25.7;

**HPLC analysis:** Daicel CHIRALCEL<sup>®</sup> OD-H, *n*-hexane/*i*-PrOH = 95/5, flow rate = 1.0 mL/min, λ = 254 nm, retention time: *t*<sub>major</sub> = 7.6 min, *t*<sub>minor</sub> = 9.5 min;

**HRMS (ESI)** *m/z*: [M+Na]<sup>+</sup> calculated for C<sub>23</sub>H<sub>22</sub>O<sub>4</sub>SeNa<sup>+</sup>: 465.0576, found: 465.0578;

[α]<sub>D</sub><sup>25</sup> = -8.95 (c = 0.08, CHCl<sub>3</sub>).

## 7. Single-crystal x-ray diffraction data

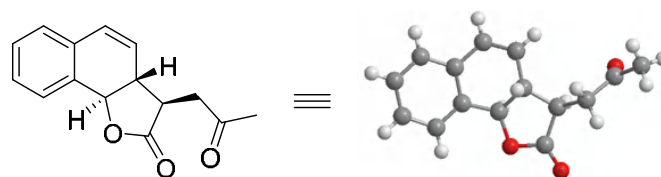

X-ray of (*R,R,R*)-**3a**

(*R,R,R*)-**3a** (CCDC NO.: 2330703)

|                      |                                                                                                                           |
|----------------------|---------------------------------------------------------------------------------------------------------------------------|
| Identification code  | cu_230615B                                                                                                                |
| Chemical formula     | C <sub>15</sub> H <sub>14</sub> O <sub>3</sub>                                                                            |
| Formula weight       | 242.26 g/mol                                                                                                              |
| Wavelength           | 1.54178 Å                                                                                                                 |
| Crystal size         | 0.180 x 0.220 x 0.240 mm                                                                                                  |
| Crystal system       | monoclinic                                                                                                                |
| Space group          | P 1 21 1                                                                                                                  |
| Unit cell dimensions | <i>a</i> = 5.1343(4) Å      α = 90°<br><i>b</i> = 9.3898(7) Å      β = 100.387(2)°<br><i>c</i> = 12.4989(10) Å    γ = 90° |
| Volume               | 592.70(8) Å <sup>3</sup>                                                                                                  |
| <i>Z</i>             | 2                                                                                                                         |
| Density (calculated) | 1.357 g/cm <sup>3</sup>                                                                                                   |

|                                   |                                                                                                                           |
|-----------------------------------|---------------------------------------------------------------------------------------------------------------------------|
| Absorption coefficient            | 0.766 mm <sup>-1</sup>                                                                                                    |
| F(000)                            | 256                                                                                                                       |
| Theta range for data collection   | 3.60 to 77.31°                                                                                                            |
| Index ranges                      | -6<=h<=6, -11<=k<=11, -15<=l<=15                                                                                          |
| Reflections collected             | 14995                                                                                                                     |
| Independent reflections           | 2439 [R(int) = 0.0380]                                                                                                    |
| Max. and min. transmission        | 0.7541 and 0.6271                                                                                                         |
| Structure solution technique      | direct methods                                                                                                            |
| Structure solution program        | SHELXT 2018/2 (Sheldrick, 2018)                                                                                           |
| Refinement method                 | Full-matrix least-squares on F <sup>2</sup>                                                                               |
| Refinement program                | SHELXL 2018/3 (Sheldrick, 2015)                                                                                           |
| Function minimized                | $\Sigma w(F_o^2 - F_c^2)^2$                                                                                               |
| Data / restraints / parameters    | 2439 / 1 / 164                                                                                                            |
| Goodness-of-fit on F <sup>2</sup> | 1.038                                                                                                                     |
| Final R indices                   | 2433 data; I>2 $\sigma$ (I)    R1 = 0.0336, wR2 = 0.0875<br>all data                            R1 = 0.0337, wR2 = 0.0875 |
| Weighting scheme                  | w=1/[ $\sigma^2(F_o^2)+(0.0588P)^2+0.1215P$ ]<br>where P=(F <sub>o</sub> <sup>2</sup> +2F <sub>c</sub> <sup>2</sup> )/3   |
| Absolute structure parameter      | -0.14(14)                                                                                                                 |
| Largest diff. peak and hole       | 0.194 and -0.177 eÅ <sup>-3</sup>                                                                                         |
| R.M.S. deviation from mean        | 0.039 eÅ <sup>-3</sup>                                                                                                    |

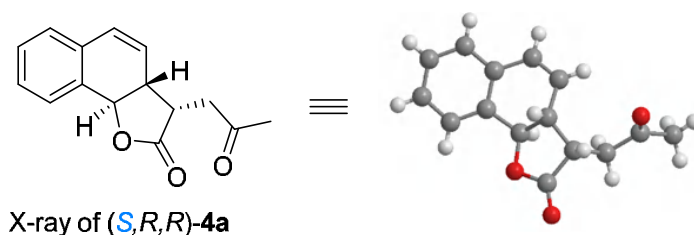

X-ray of (*S,R,R*)-**4a**

(*S,R,R*)-**4a** (CCDC NO.: 2330704)

|                      |                                                |
|----------------------|------------------------------------------------|
| Identification code  | cu_240201D                                     |
| Chemical formula     | C <sub>15</sub> H <sub>14</sub> O <sub>3</sub> |
| Formula weight       | 242.26 g/mol                                   |
| Wavelength           | 1.54178 Å                                      |
| Crystal size         | 0.100 x 0.200 x 0.210 mm                       |
| Crystal system       | monoclinic                                     |
| Space group          | P 1 21 1                                       |
| Unit cell dimensions | a = 5.4496(8) Å $\alpha$ = 90°                 |

|                                   |                                                     |                           |
|-----------------------------------|-----------------------------------------------------|---------------------------|
|                                   | $b = 9.7142(15) \text{ \AA}$                        | $\beta = 99.517(5)^\circ$ |
|                                   | $c = 11.8110(18) \text{ \AA}$                       | $\gamma = 90^\circ$       |
| Volume                            | 616.65(16) $\text{\AA}^3$                           |                           |
| Z                                 | 2                                                   |                           |
| Density (calculated)              | 1.305 $\text{g/cm}^3$                               |                           |
| Absorption coefficient            | 0.736 $\text{mm}^{-1}$                              |                           |
| F(000)                            | 256                                                 |                           |
| Theta range for data collection   | 8.88 to 77.69°                                      |                           |
| Index ranges                      | -6 ≤ h ≤ 6, -12 ≤ k ≤ 11, -14 ≤ l ≤ 14              |                           |
| Reflections collected             | 14724                                               |                           |
| Independent reflections           | 2548 [R(int) = 0.0309]                              |                           |
| Max. and min. transmission        | 0.7541 and 0.5725                                   |                           |
| Structure solution technique      | direct methods                                      |                           |
| Structure solution program        | SHELXT 2018/2 (Sheldrick, 2018)                     |                           |
| Refinement method                 | Full-matrix least-squares on F <sup>2</sup>         |                           |
| Refinement program                | SHELXL 2018/3 (Sheldrick, 2015)                     |                           |
| Function minimized                | $\Sigma w(F_o^2 - F_c^2)^2$                         |                           |
| Data / restraints / parameters    | 2548 / 1 / 163                                      |                           |
| Goodness-of-fit on F <sup>2</sup> | 1.055                                               |                           |
| Final R indices                   | 2492 data; I > 2σ(I)                                | R1 = 0.0319, wR2 = 0.0847 |
|                                   | all data                                            | R1 = 0.0329, wR2 = 0.0856 |
| Weighting scheme                  | $w = 1 / [\sigma^2(F_o^2) + (0.0519P)^2 + 0.0354P]$ |                           |
|                                   | where $P = (F_o^2 + 2F_c^2) / 3$                    |                           |
| Absolute structure parameter      | -0.03(9)                                            |                           |
| Largest diff. peak and hole       | 0.103 and -0.120 $\text{e\AA}^{-3}$                 |                           |
| R.M.S. deviation from mean        | 0.032 $\text{e\AA}^{-3}$                            |                           |

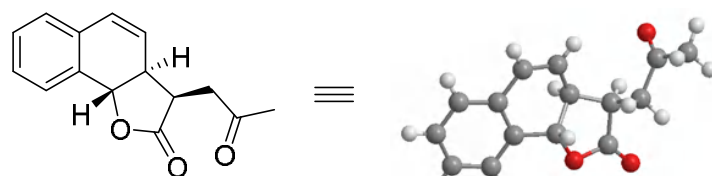

X-ray of (*R,S,S*)-**4a**

(*R,S,S*)-**4a** (CCDC NO.: 2333474)

Identification code cu\_230614B

|                                   |                                                                                                                                                               |                           |
|-----------------------------------|---------------------------------------------------------------------------------------------------------------------------------------------------------------|---------------------------|
| Chemical formula                  | C <sub>15</sub> H <sub>14</sub> O <sub>3</sub>                                                                                                                |                           |
| Formula weight                    | 242.26 g/mol                                                                                                                                                  |                           |
| Wavelength                        | 1.54178 Å                                                                                                                                                     |                           |
| Crystal size                      | 0.180 x 0.190 x 0.210 mm                                                                                                                                      |                           |
| Crystal system                    | monoclinic                                                                                                                                                    |                           |
| Space group                       | P 1 21 1                                                                                                                                                      |                           |
| Unit cell dimensions              | a = 5.3990(4) Å                                                                                                                                               | α = 90°                   |
|                                   | b = 9.4977(8) Å                                                                                                                                               | β = 99.880(2)°            |
|                                   | c = 11.7771(9) Å                                                                                                                                              | γ = 90°                   |
| Volume                            | 594.95(8) Å <sup>3</sup>                                                                                                                                      |                           |
| Z                                 | 2                                                                                                                                                             |                           |
| Density (calculated)              | 1.352 g/cm <sup>3</sup>                                                                                                                                       |                           |
| Absorption coefficient            | 0.763 mm <sup>-1</sup>                                                                                                                                        |                           |
| F(000)                            | 256                                                                                                                                                           |                           |
| Theta range for data collection   | 7.64 to 77.25°                                                                                                                                                |                           |
| Index ranges                      | -6<=h<=5, -11<=k<=11, -14<=l<=14                                                                                                                              |                           |
| Reflections collected             | 9302                                                                                                                                                          |                           |
| Independent reflections           | 2440 [R(int) = 0.0220]                                                                                                                                        |                           |
| Max. and min. transmission        | 0.7541 and 0.6158                                                                                                                                             |                           |
| Structure solution technique      | direct methods                                                                                                                                                |                           |
| Structure solution program        | SHELXT 2018/2 (Sheldrick, 2018)                                                                                                                               |                           |
| Refinement method                 | Full-matrix least-squares on F <sup>2</sup>                                                                                                                   |                           |
| Refinement program                | SHELXL 2018/3 (Sheldrick, 2015)                                                                                                                               |                           |
| Function minimized                | Σ w(F <sub>o</sub> <sup>2</sup> - F <sub>c</sub> <sup>2</sup> ) <sup>2</sup>                                                                                  |                           |
| Data / restraints / parameters    | 2440 / 1 / 164                                                                                                                                                |                           |
| Goodness-of-fit on F <sup>2</sup> | 1.059                                                                                                                                                         |                           |
| Final R indices                   | 2431 data; I>2σ(I)                                                                                                                                            | R1 = 0.0272, wR2 = 0.0732 |
|                                   | all data                                                                                                                                                      | R1 = 0.0273, wR2 = 0.0734 |
| Weighting scheme                  | w=1/[σ <sup>2</sup> (F <sub>o</sub> <sup>2</sup> )+(0.0455P) <sup>2</sup> +0.0994P]<br>where P=(F <sub>o</sub> <sup>2</sup> +2F <sub>c</sub> <sup>2</sup> )/3 |                           |
| Absolute structure parameter      | 0.02(5)                                                                                                                                                       |                           |
| Largest diff. peak and hole       | 0.206 and -0.165 eÅ <sup>-3</sup>                                                                                                                             |                           |
| R.M.S. deviation from mean        | 0.034 eÅ <sup>-3</sup>                                                                                                                                        |                           |

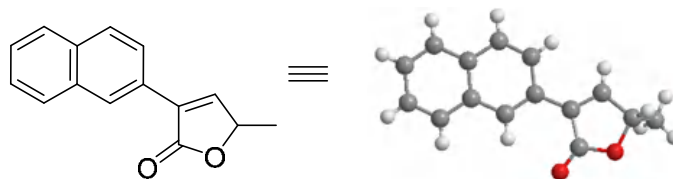

X-ray of **9**

**9** (CCDC NO.: 2341397)

|                                   |                                                                                                    |
|-----------------------------------|----------------------------------------------------------------------------------------------------|
| Identification code               | mo_231017B                                                                                         |
| Chemical formula                  | C <sub>15</sub> H <sub>12</sub> O <sub>2</sub>                                                     |
| Formula weight                    | 224.25 g/mol                                                                                       |
| Wavelength                        | 0.71073 Å                                                                                          |
| Crystal size                      | 0.060 x 0.100 x 0.130 mm                                                                           |
| Crystal system                    | monoclinic                                                                                         |
| Space group                       | P 1 21/n 1                                                                                         |
| Unit cell dimensions              | a = 12.0381(14) Å    α = 90°<br>b = 6.3338(6) Å    β = 108.132(4)°<br>c = 15.2736(19) Å    γ = 90° |
| Volume                            | 1106.7(2) Å <sup>3</sup>                                                                           |
| Z                                 | 4                                                                                                  |
| Density (calculated)              | 1.346 g/cm <sup>3</sup>                                                                            |
| Absorption coefficient            | 0.089 mm <sup>-1</sup>                                                                             |
| F(000)                            | 472                                                                                                |
| Theta range for data collection   | 2.59 to 25.00°                                                                                     |
| Index ranges                      | -14 ≤ h ≤ 14, -7 ≤ k ≤ 6, -18 ≤ l ≤ 18                                                             |
| Reflections collected             | 6394                                                                                               |
| Independent reflections           | 1953 [R(int) = 0.0775]                                                                             |
| Max. and min. transmission        | 0.7457 and 0.6849                                                                                  |
| Structure solution technique      | direct methods                                                                                     |
| Structure solution program        | SHELXT 2018/2 (Sheldrick, 2018)                                                                    |
| Refinement method                 | Full-matrix least-squares on F <sup>2</sup>                                                        |
| Refinement program                | SHELXL 2018/3 (Sheldrick, 2015)                                                                    |
| Function minimized                | Σ w(F <sub>o</sub> <sup>2</sup> - F <sub>c</sub> <sup>2</sup> ) <sup>2</sup>                       |
| Data / restraints / parameters    | 1953 / 0 / 155                                                                                     |
| Goodness-of-fit on F <sup>2</sup> | 1.092                                                                                              |
| Final R indices                   | 1372 data; I > 2σ(I)    R1 = 0.0781, wR2 = 0.1855<br>all data    R1 = 0.1116, wR2 = 0.2052         |
| Weighting scheme                  | w = 1/[σ <sup>2</sup> (F <sub>o</sub> <sup>2</sup> ) + (0.0819P) <sup>2</sup> + 1.3542P]           |

|                             |                                   |
|-----------------------------|-----------------------------------|
|                             | where $P=(F_o^2+2F_c^2)/3$        |
| Largest diff. peak and hole | 0.741 and -0.376 eÅ <sup>-3</sup> |
| R.M.S. deviation from mean  | 0.071 eÅ <sup>-3</sup>            |

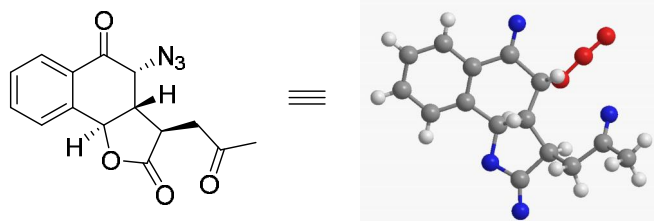

**13** (CCDC NO.: 2505939)

|                                 |                                                                                              |
|---------------------------------|----------------------------------------------------------------------------------------------|
| Identification code             | cu_250420A                                                                                   |
| Chemical formula                | C <sub>15</sub> H <sub>13</sub> N <sub>3</sub> O <sub>4</sub>                                |
| Formula weight                  | 299.28 g/mol                                                                                 |
| Wavelength                      | 1.54178 Å                                                                                    |
| Crystal size                    | 0.130 x 0.170 x 0.190 mm                                                                     |
| Crystal system                  | orthorhombic                                                                                 |
| Space group                     | P 21 21 21                                                                                   |
| Unit cell dimensions            | a = 5.6634(5) Å      α = 90°<br>b = 9.6041(8) Å      β = 90°<br>c = 25.492(2) Å      γ = 90° |
| Volume                          | 1106.7(2) Å <sup>3</sup>                                                                     |
| Z                               | 4                                                                                            |
| Density (calculated)            | 1386.6(2) Å <sup>3</sup>                                                                     |
| Absorption coefficient          | 0.089 mm <sup>-1</sup>                                                                       |
| F(000)                          | 624                                                                                          |
| Theta range for data collection | 4.92 to 77.96°                                                                               |
| Index ranges                    | -7<=h<=4, -12<=k<=12, -32<=l<=31                                                             |
| Reflections collected           | 22175                                                                                        |
| Independent reflections         | 2925 [R(int) = 0.0391]                                                                       |
| Max. and min. transmission      | 0.7541 and 0.6609                                                                            |
| Structure solution technique    | direct methods                                                                               |
| Structure solution program      | SHELXT 2018/2 (Sheldrick, 2018)                                                              |
| Refinement method               | Full-matrix least-squares on F <sup>2</sup>                                                  |
| Refinement program              | SHELXL 2018/3 (Sheldrick, 2015)                                                              |
| Function minimized              | Σ w(F <sub>o</sub> <sup>2</sup> - F <sub>c</sub> <sup>2</sup> ) <sup>2</sup>                 |
| Data / restraints / parameters  | 1925 / 0 / 200                                                                               |

|                              |                                                            |
|------------------------------|------------------------------------------------------------|
| Goodness-of-fit on F2        | 1.059                                                      |
| Final R indices              | 2909 data; $I > 2\sigma(I)$ $R1 = 0.0291$ , $wR2 = 0.0807$ |
|                              | all data $R1 = 0.0292$ , $wR2 = 0.0808$                    |
| Weighting scheme             | $w = 1 / [\sigma^2(F_o^2) + (0.0542P)^2 + 0.2148P]$        |
|                              | where $P = (F_o^2 + 2F_c^2) / 3$                           |
| Absolute structure parameter | -0.04(5)                                                   |
| Largest diff. peak and hole  | 0.161 and -0.187 $e\text{\AA}^{-3}$                        |
| R.M.S. deviation from mean   | 0.041 $e\text{\AA}^{-3}$                                   |

## 8. References

1. L. Zhang, C. M. Le and M. Lautens, *Angew. Chem. Int. Ed.*, 2014, **53**, 5951-5954.
2. S. Li, Q. Chen, J. Yang and J. Zhang, *Angew. Chem. Int. Ed.*, 2022, **61**, e202202046. According to Zhang's report, the absolute configuration and structure of **5a** was assigned to be *R*.
3. M. J. Frisch, G. W. Trucks, H. B. Schlegel, G. E. Scuseria, M. A. Robb, J. R. Cheeseman, G. Scalmani, V. Barone, G. A. Petersson, H. Nakatsuji, X. Li, M. Caricato, A. V. Marenich, J. Bloino, B. G. Janesko, R. Gomperts, B. Mennucci, H. P. Hratchian, J. V. Ortiz, A. F. Izmaylov, J. L. Sonnenberg, Williams, F. Ding, F. Lipparini, F. Egidi, J. Goings, B. Peng, A. Petrone, T. Henderson, D. Ranasinghe, V. G. Zakrzewski, J. Gao, N. Rega, G. Zheng, W. Liang, M. Hada, M. Ehara, K. Toyota, R. Fukuda, J. Hasegawa, M. Ishida, T. Nakajima, Y. Honda, O. Kitao, H. Nakai, T. Vreven, K. Throssell, J. A. Montgomery Jr., J. E. Peralta, F. Ogliaro, M. J. Bearpark, J. J. Heyd, E. N. Brothers, K. N. Kudin, V. N. Staroverov, T. A. Keith, R. Kobayashi, J. Normand, K. Raghavachari, A. P. Rendell, J. C. Burant, S. S. Iyengar, J. Tomasi, M. Cossi, J. M. Millam, M. Klene, C. Adamo, R. Cammi, J. W. Ochterski, R. L. Martin, K. Morokuma, O. Farkas, J. B. Foresman and D. J. Fox, Gaussian 16 Rev. A.03, Wallingford, CT, 2016.
4. A. D. Becke, *J. Chem. Phys.*, 1993, **98**, 5648-5652.
5. S. Grimme, J. Antony, S. Ehrlich and H. Krieg, *J. Chem. Phys.*, 2010, **132**, 154104.
6. F. Weigend and R. Ahlrichs, *Phys. Chem. Chem. Phys.*, 2005, **7**, 3297-3305.
7. K. Fukui, *Acc. Chem. Res.*, 1981, **14**, 363-368.
8. D. Andrae, U. Häußermann, M. Dolg, H. Stoll and H. Preuß, *Theor. Chim. Acta*, 1990, **77**, 123-141.
9. A. V. Marenich, C. J. Cramer and D. G. Truhlar, *J. Phys. Chem. B*, 2009, **113**, 6378-6396.
10. G. Scalmani and M. J. Frisch, *J. Chem. Phys.*, 2010, **132**, 114110.
11. T. D. Tran, N. B. Pham, R. Booth, P. I. Forster and R. J. Quinn, *J. Nat. Prod.*, 2016, **79**, 1514-1523.

12. S. Song, X. Huang, M. Bai, G. Yao, H. Chang and J. Li, CN Patent 115894414 A, 2023.
13. P. C. Eklund, S. M. Willfor, A. I. Smeds, F. J. Sundell, R. E. Sjöholm and B. R. Holmbom, *J. Nat. Prod.*, 2004, **67**, 927-931.
14. P. A. Onocha and M. S. Ali, *Res. J. Phytochem.*, 2011, **5**, 136-145.
15. S.-J. Xiao, D.-L. Guo, B. Xia, S. Allen, Y.-C. Gu, F. Chen, L.-S. Ding and Y. Zhou, *Planta Med.*, 2016, **82**, 723-728.
16. K. H. Kim, K. W. Woo, E. Moon, S. U. Choi, S. Y. Kim, S. Z. Choi, M. W. Son and K. R. Lee, *J. Agric. Food Chem.*, 2014, **62**, 7746-7752.
17. S. Mitra, S. R. Gurralla and R. S. Coleman, *J. Org. Chem.*, 2007, **72**, 8724-8736.
18. P. V. Ramachandran and M. Seleem, WO Patent 2023/150719 A1, 2023.
19. R. Bandichhor, B. Nosse and O. Reiser, In *Natural Product Synthesis I; Topics in Current Chemistry*; Springer-Verlag: Berlin, Heidelberg, 2005; Vol. 243, pp 43-72.
20. T. Matsumoto, Y. Takeda, M. Oiwa, K. Fujii, M. Kishida, H. Shibutani and S. Imai, *Chem. Pharm. Bull.*, 1995, **43**, 2099-2104.
21. W. Yu, Y. Mei, Y. Kang, Z. Hua and Z. Jin, *Org. Lett.*, 2004, **6**, 3217-3219.
22. K. C. Nicolaou, V. A. Adsool and C. R. H. Hale, *Org. Lett.*, 2010, **12**, 1552-1555.
23. Z. Cheng, K. Huang, C. Wang, L. Chen, X. Li, Z. Hu, X. Shan, P.-F. Cao, H. Sun, W. Chen, C. Li, Z. Zhang, H. Tan, X. Jiang, G. Zhang, Z. Zhang, M. Lin, L. Wang, A. Zheng, C. Xia, T. Wang, S. Song, X. Shu and N. Jiao, *Science*, 2025, **387**, 1083-1090.
24. H. A. McManus, M. J. Fleming and M. Lautens, *Angew. Chem. Int. Ed.*, 2007, **46**, 433-436.
25. P. Honerjäger, A. Heiss, M. Schäfer-Korting, G. Schönsteiner and M. Reiter, *Naunyn-Schmiedeberg's Arch. Pharmacol.*, 1984, **325**, 259-269.
26. A. F. E. Rump, D. A. R. Rosen and W. Klaus, *Pharmacol. Toxicol.*, 1994, **74**, 244-248.
27. R. Jonas, M. Klockow, I. Lues, H. Prucher, H. J. Schliep and H. Würziger, *Eur. J. Med. Chem.*, 1993, **28**, 129-140.
28. D. W. Combs, M. S. Rampulla, S. C. Bell, D. H. Klaubert, A. J. Tobia, R. Falotico, B. Haertlein, C. Lakas-Weiss and J. B. Moore, *J. Med. Chem.*, 1990, **33**, 380-386.

29. H. Xu, M. Zhan, B. Liu and H. Yang, *Chin. J. Org. Chem.*, 2014, **34**, 722-728.
30. L. Zu, B. W. Boal and N. K. Garg, *J. Am. Chem. Soc.*, 2011, **133**, 8877-8879.
31. M. E. Hattab, G. Genta-Jouve, N. Bouzidi, A. Ortalo-Magne, C. Hellio, J.-P. Marechal, L. Piovetti, O. P. Thomas and G. Culioli, *J. Nat. Prod.*, 2015, **78**, 1663-1670.
32. L. Larsen, M. H. Benn, M. Parvez and N. B. Perry, *Org. Biomol. Chem.*, 2005, **3**, 3236-3241.
33. D. Yang, H. Xie, Y. Jiang and X. Wei, *Food Chem.*, 2016, **194**, 857-863.
34. D. M. Cárdenas, F. J. R. Mejías, J. M. G. Molinillo and F. A. Macías, *J. Org. Chem.*, 2020, **85**, 7322-7332.
35. M. Xue, J. Cui, X. Zhu, F. Wang, D. Lv, Z. Nie, Y. Li and H. Bao, *Angew. Chem. Int. Ed.*, 2023, **62**, e202304275.
36. Y. Li, X. Li and J.-P. Cheng, *Adv. Synth. Catal.*, 2014, **356**, 1172-1198.
37. J. Chen, L. Su, T. Li, W. Ma, Y. Ma, C. Geng, W. Dong, X. He and X. Zhang, CN Patent 116589474 A, 2023.
38. N. Ohno, T. J. Mabry, V. Zabelt and W. H. Weston, *Phytochemistry*, 1979, **18**, 1687-1689.
39. Y.-K. Kim, K.-H. Son, J.-Y. Nam, S.-U. Kim, T.-S. Jeong, W.-S. Lee, S.-H. Bok, B.-M. Kwon, Y. J. Park and J. M. Shin, *J. Antibiot.*, 1996, **49**, 815-816.
40. Z. Xu, L. Wu, C. Xie, Y. Liu, X. Wen, Z. Gu and J. Peng, CN Patent 115991690 A, 2023.
41. J. Wellsow, R. J. Grayer, N. C. Veitch, T. Kokubun, R. Lelli, G. C. Kite and M. S. J. Simmonds, *Phytochemistry*, 2006, **67**, 1818-1825.
42. Y. Yamashita, Y. Hirano, A. Takada, H. Takikawa and K. Suzuki, *Angew. Chem. Int. Ed.*, 2013, **52**, 6658-6661.
43. X.-F. Wu, Y.-C. Hu, S. Gao, S.-S. Yu, Y.-H. Pei, W.-Z. Tang and X.-Z. Huang, *J. Asian Nat. Prod. Res.*, 2007, **9**, 471-477.
44. S. Chandrasekhar, D. Basu, M. Sailu and S. Kotamraju, *Tetrahedron Lett.*, 2009, **50**, 4882-4884.
45. J. Liu, J. Flegel, F. Otte, A. Pahl, S. Sievers, C. Strohmann and H. Waldmann, *Angew. Chem. Int. Ed.*, 2021, **60**, 21384-21395.

46. Y.-H. Wen, F. Yang, S. Li, X. Yao, J. Song and L.-Z. Gong, *J. Am. Chem. Soc.*, 2023, **145**, 4199-4207.

## 9. NMR spectra

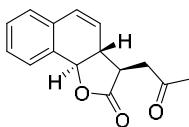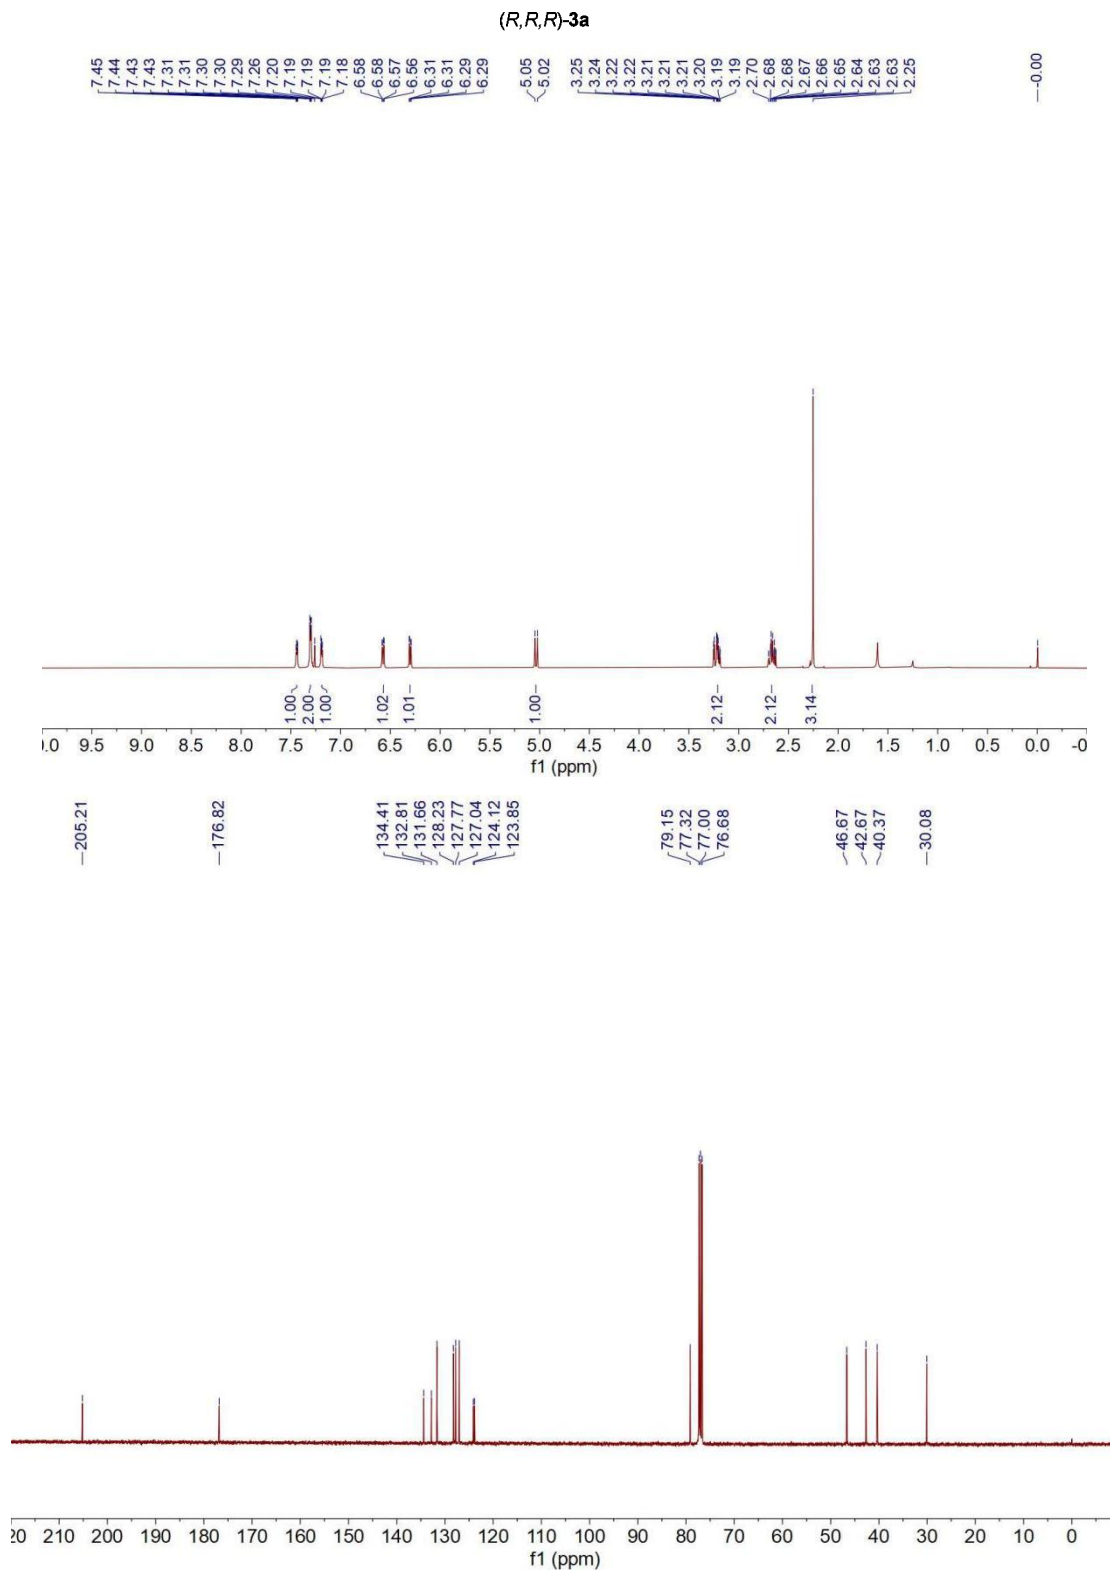

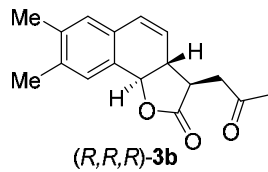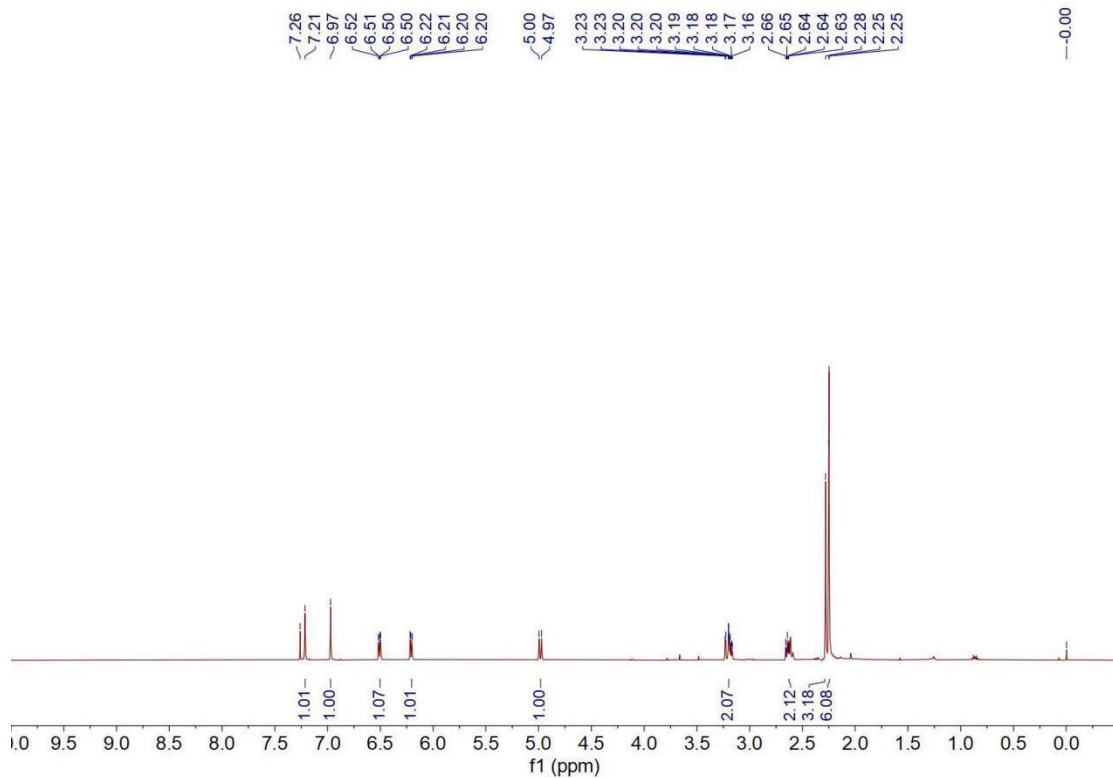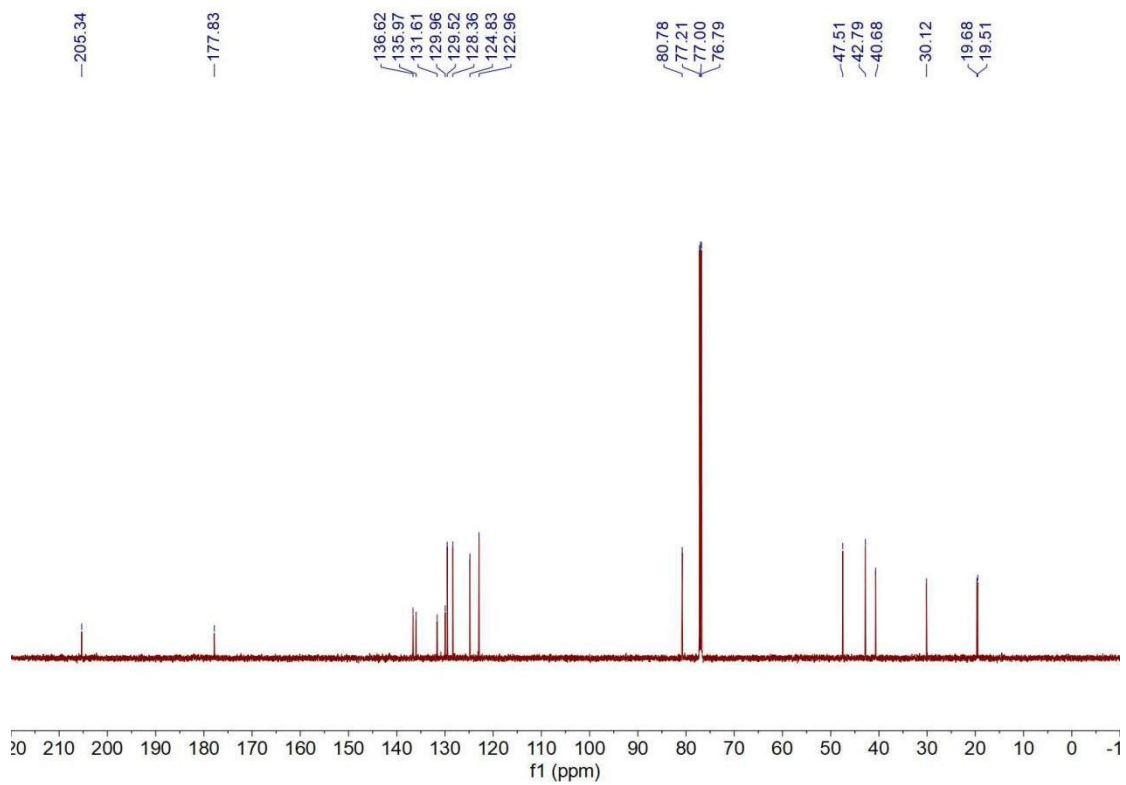

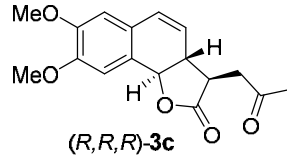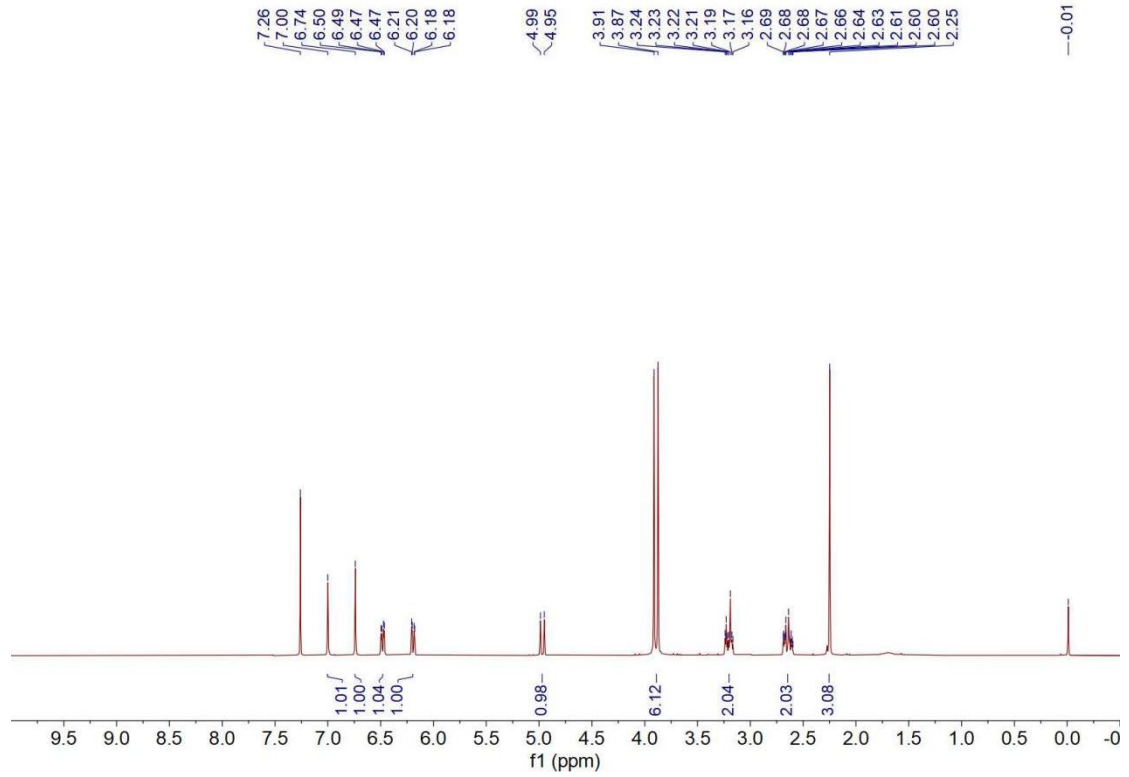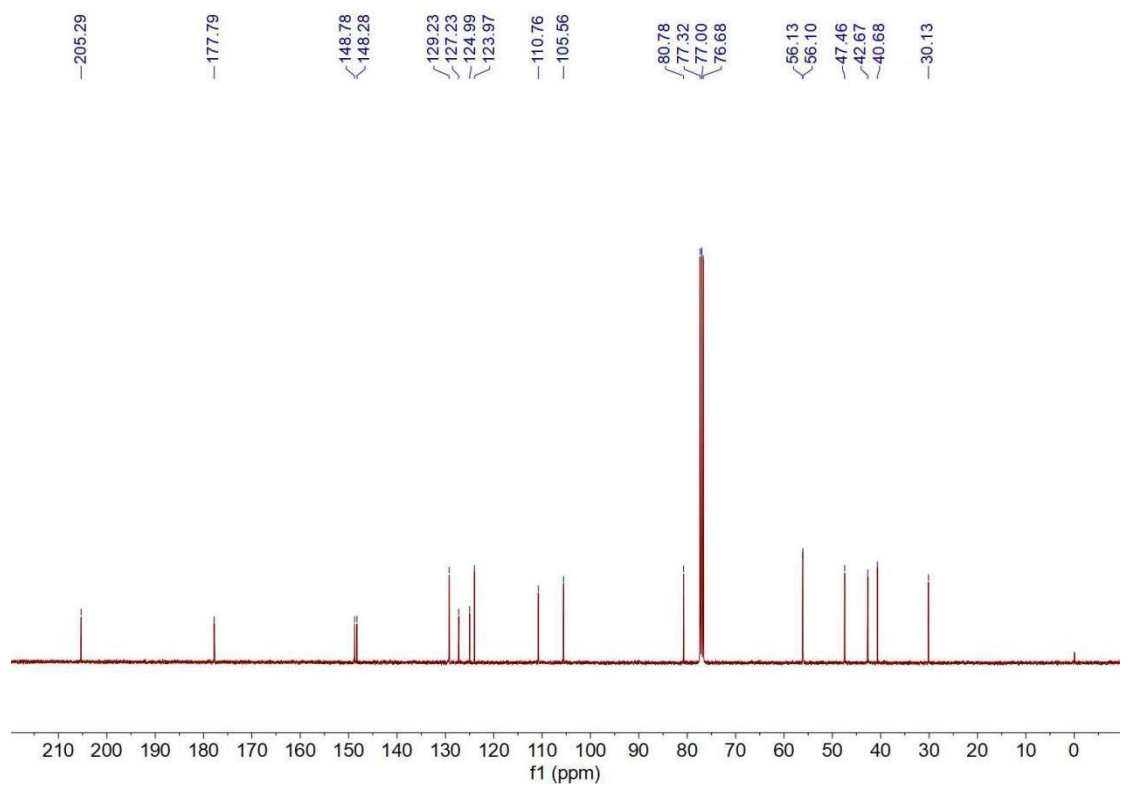

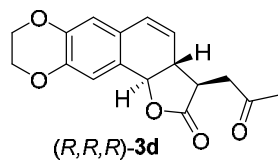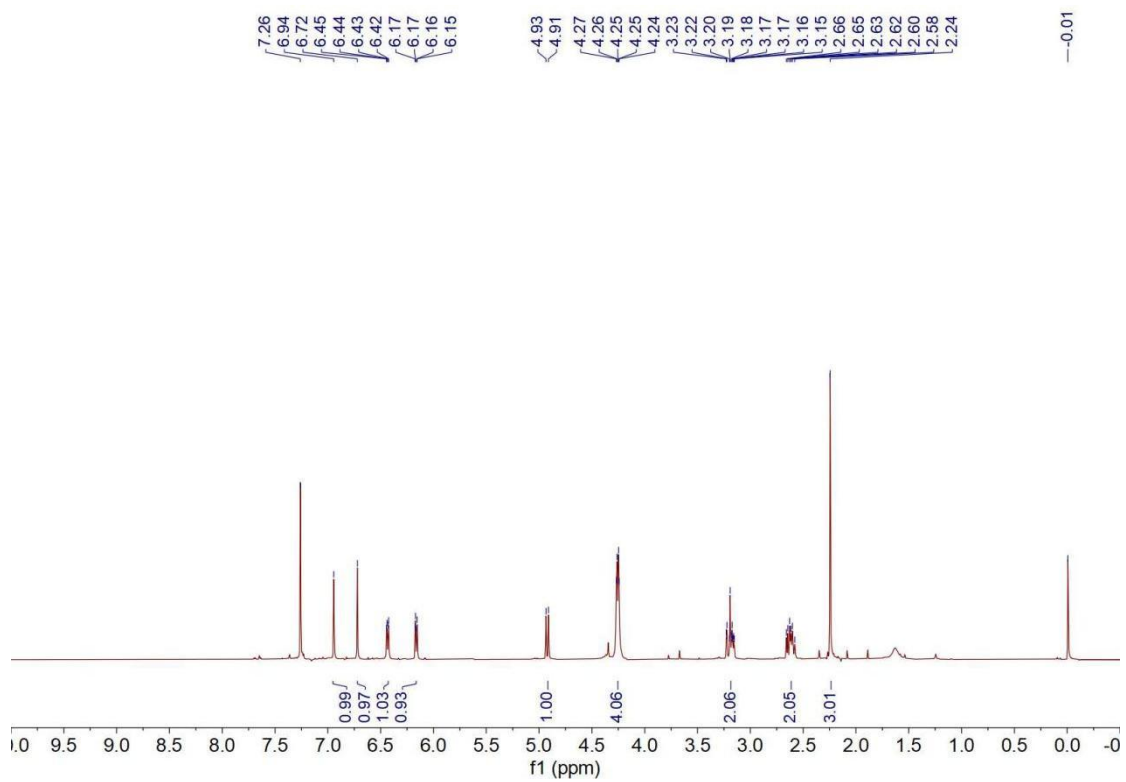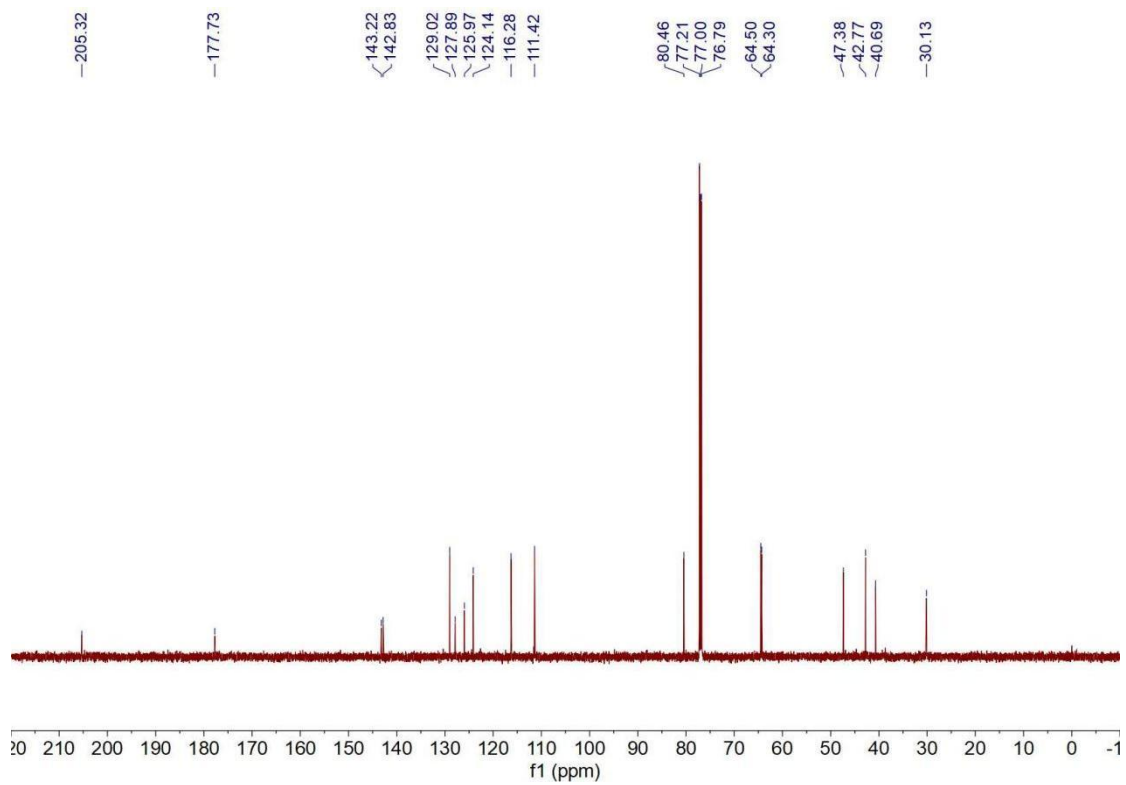

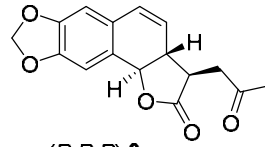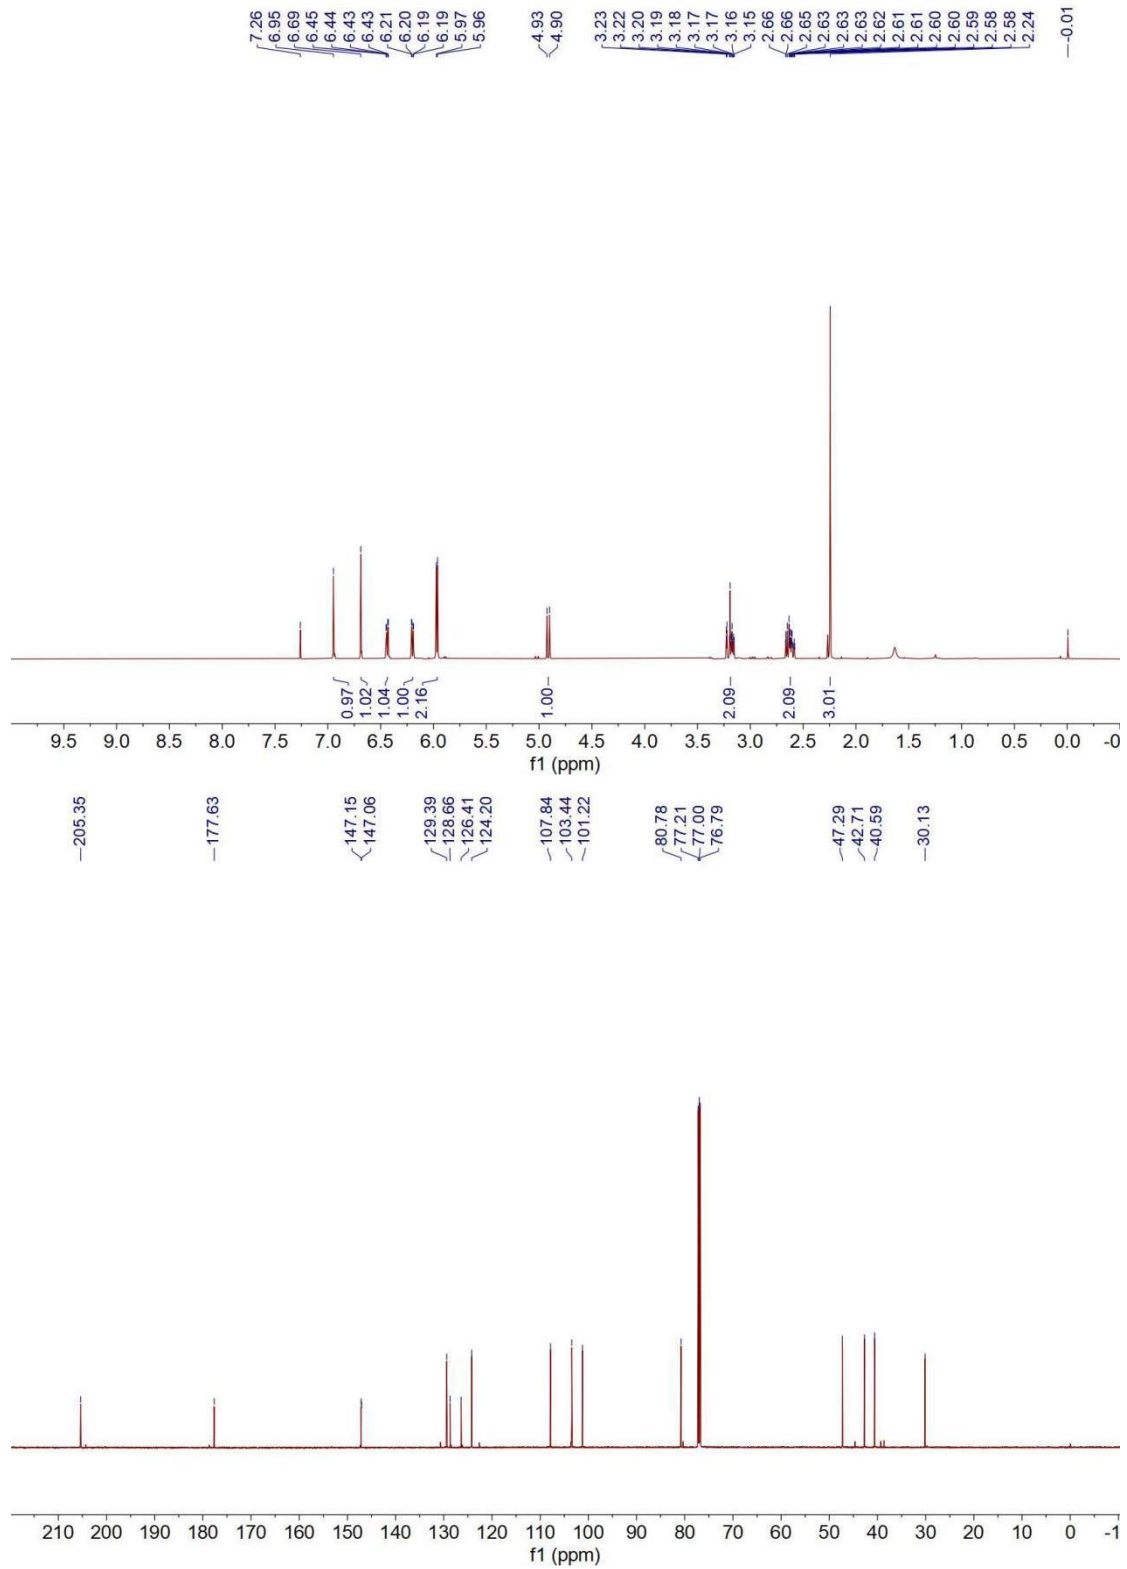

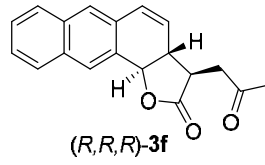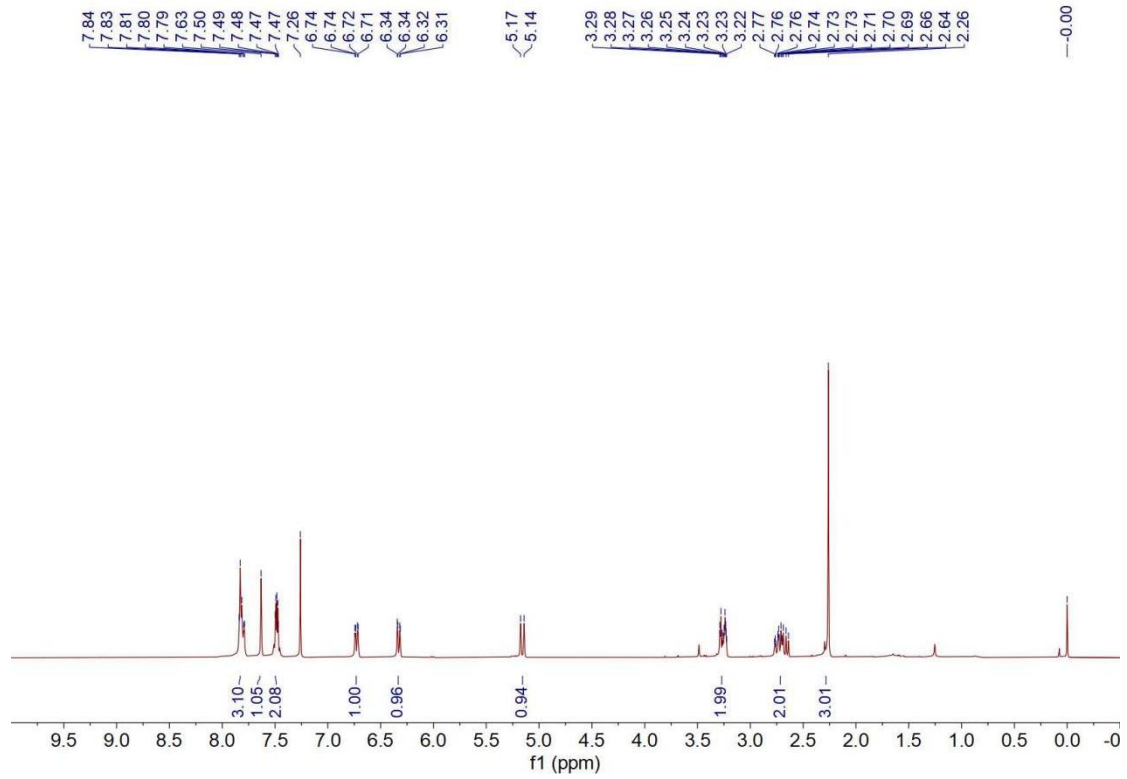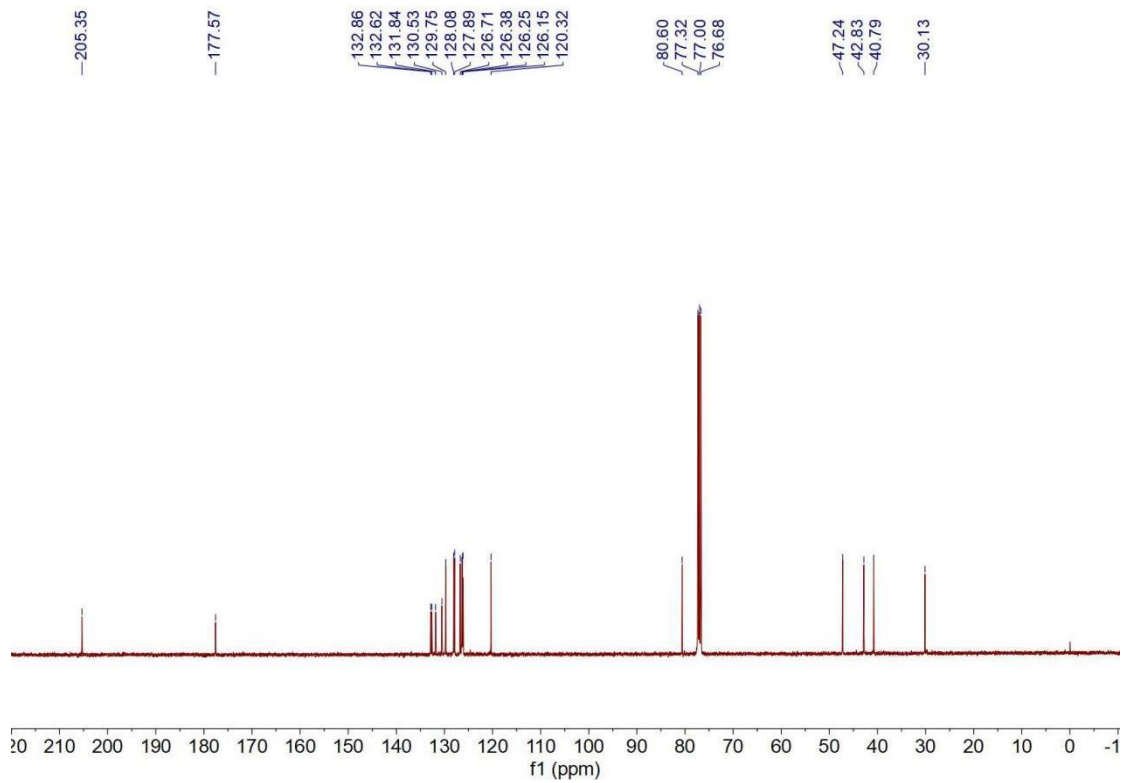

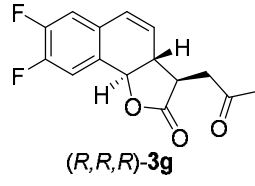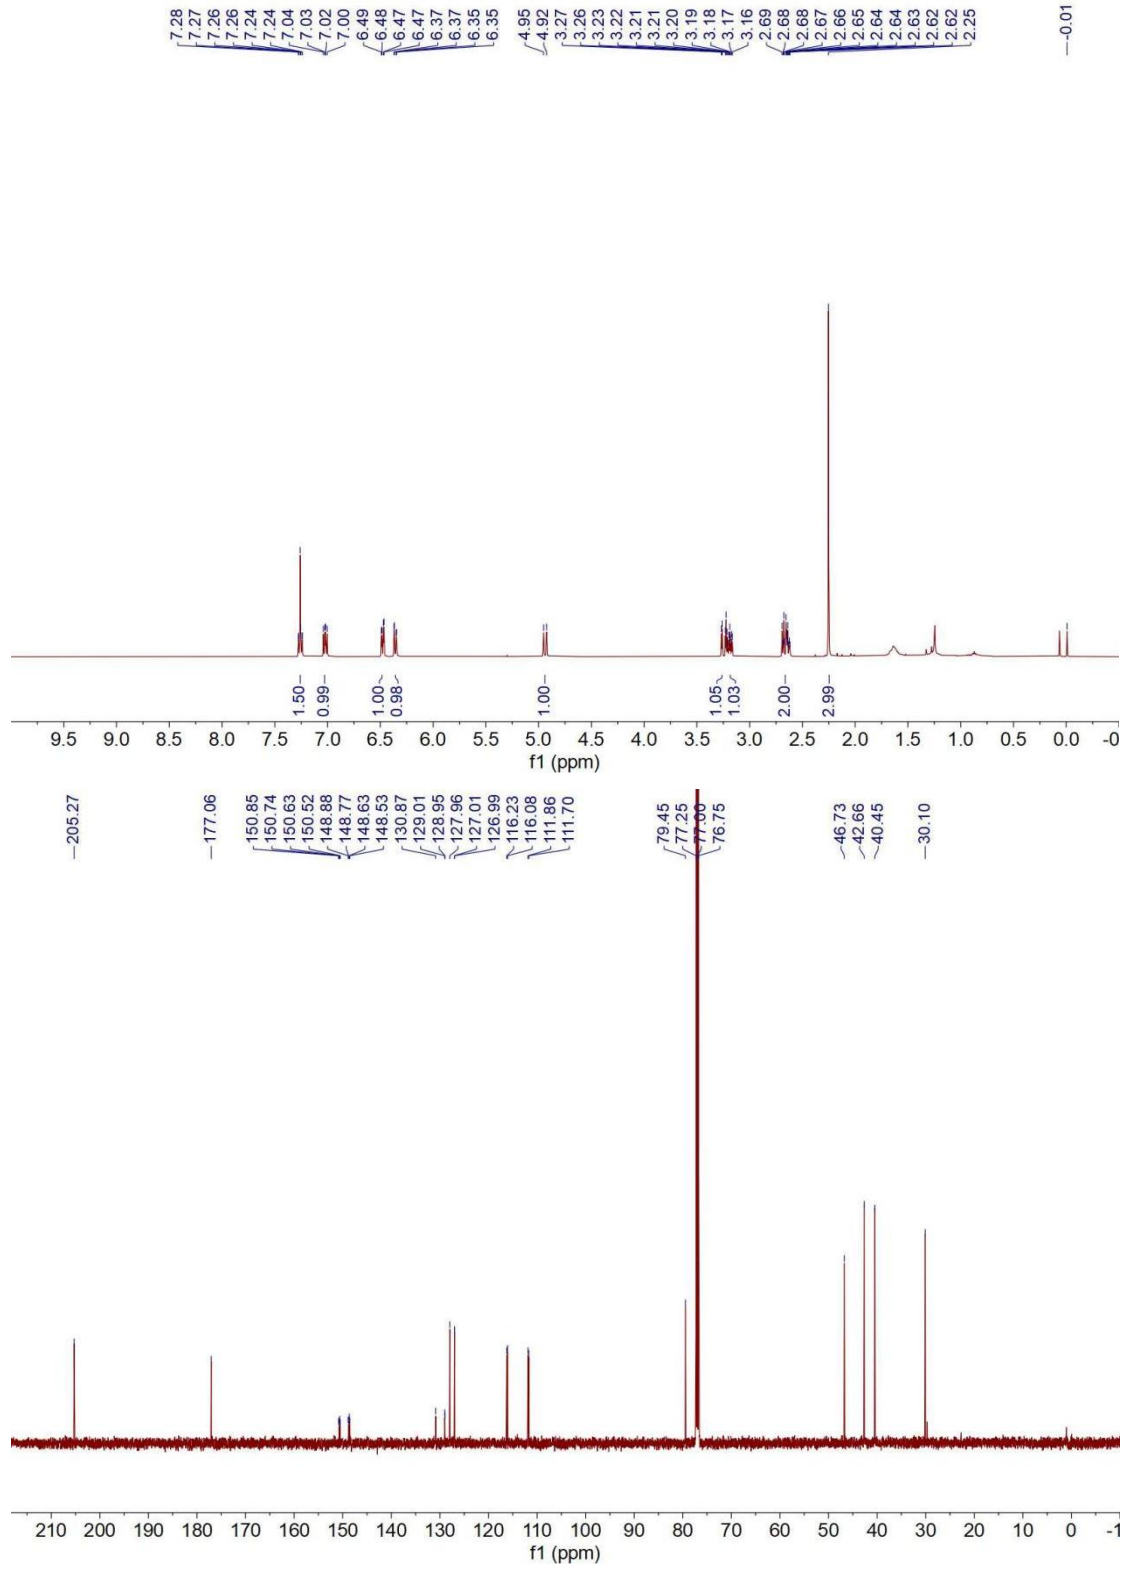

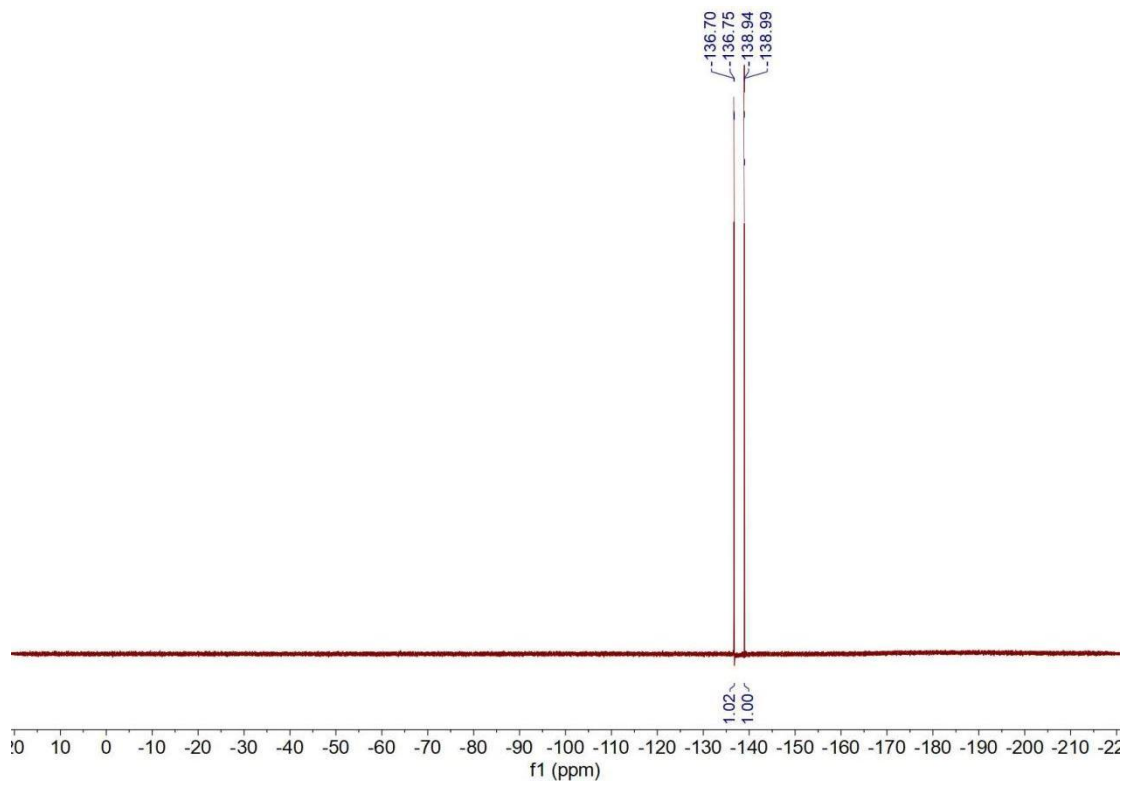

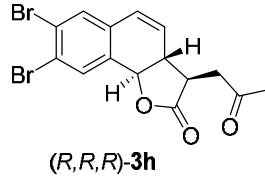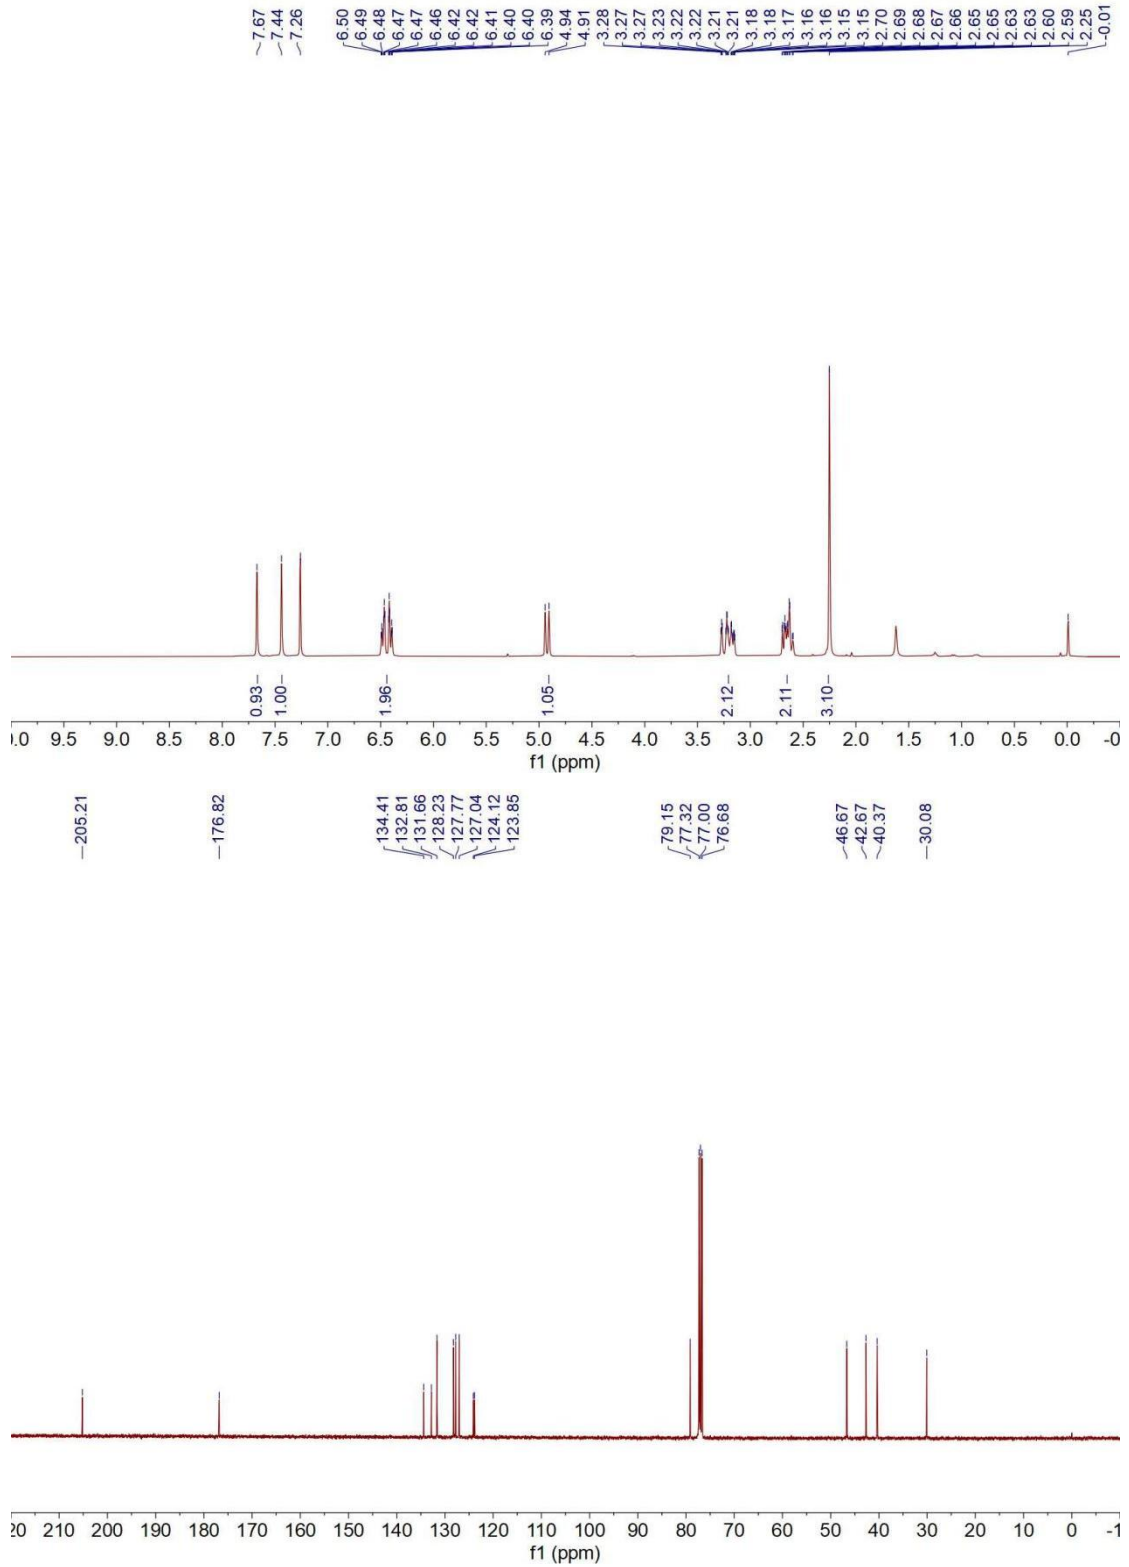

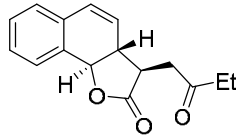

(*R,R,R*)-3i

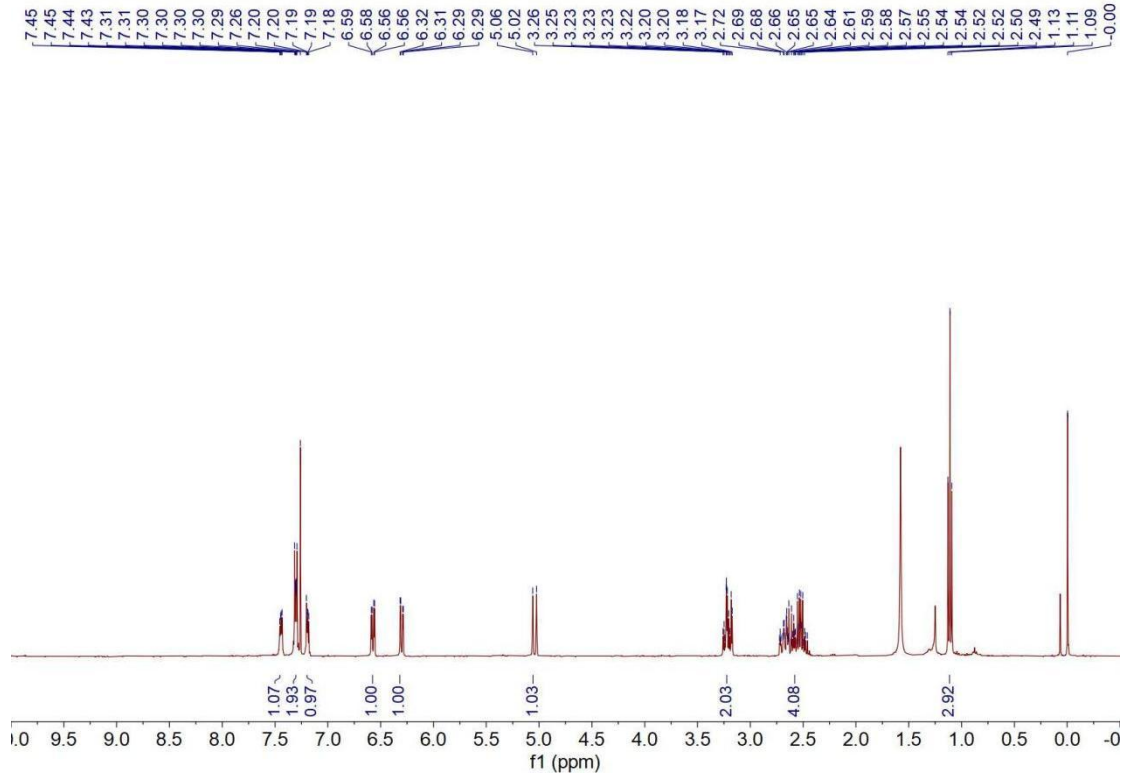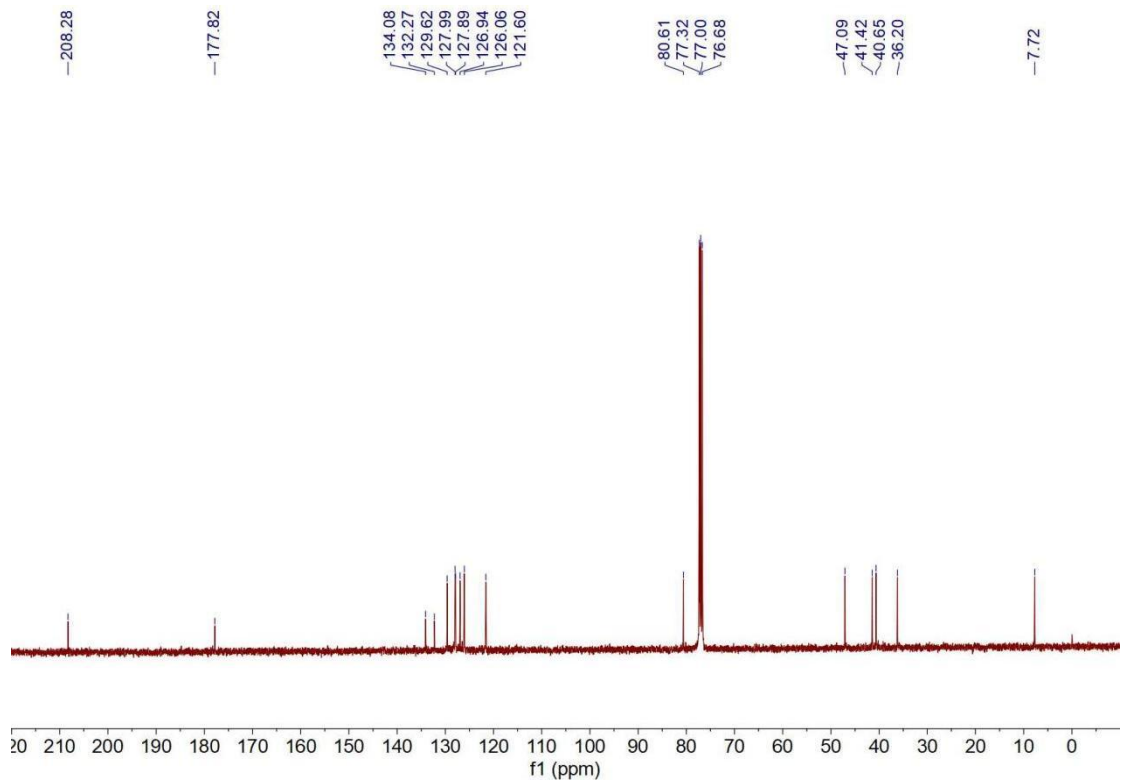



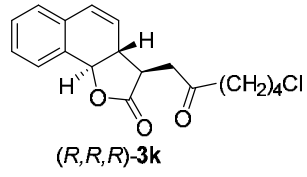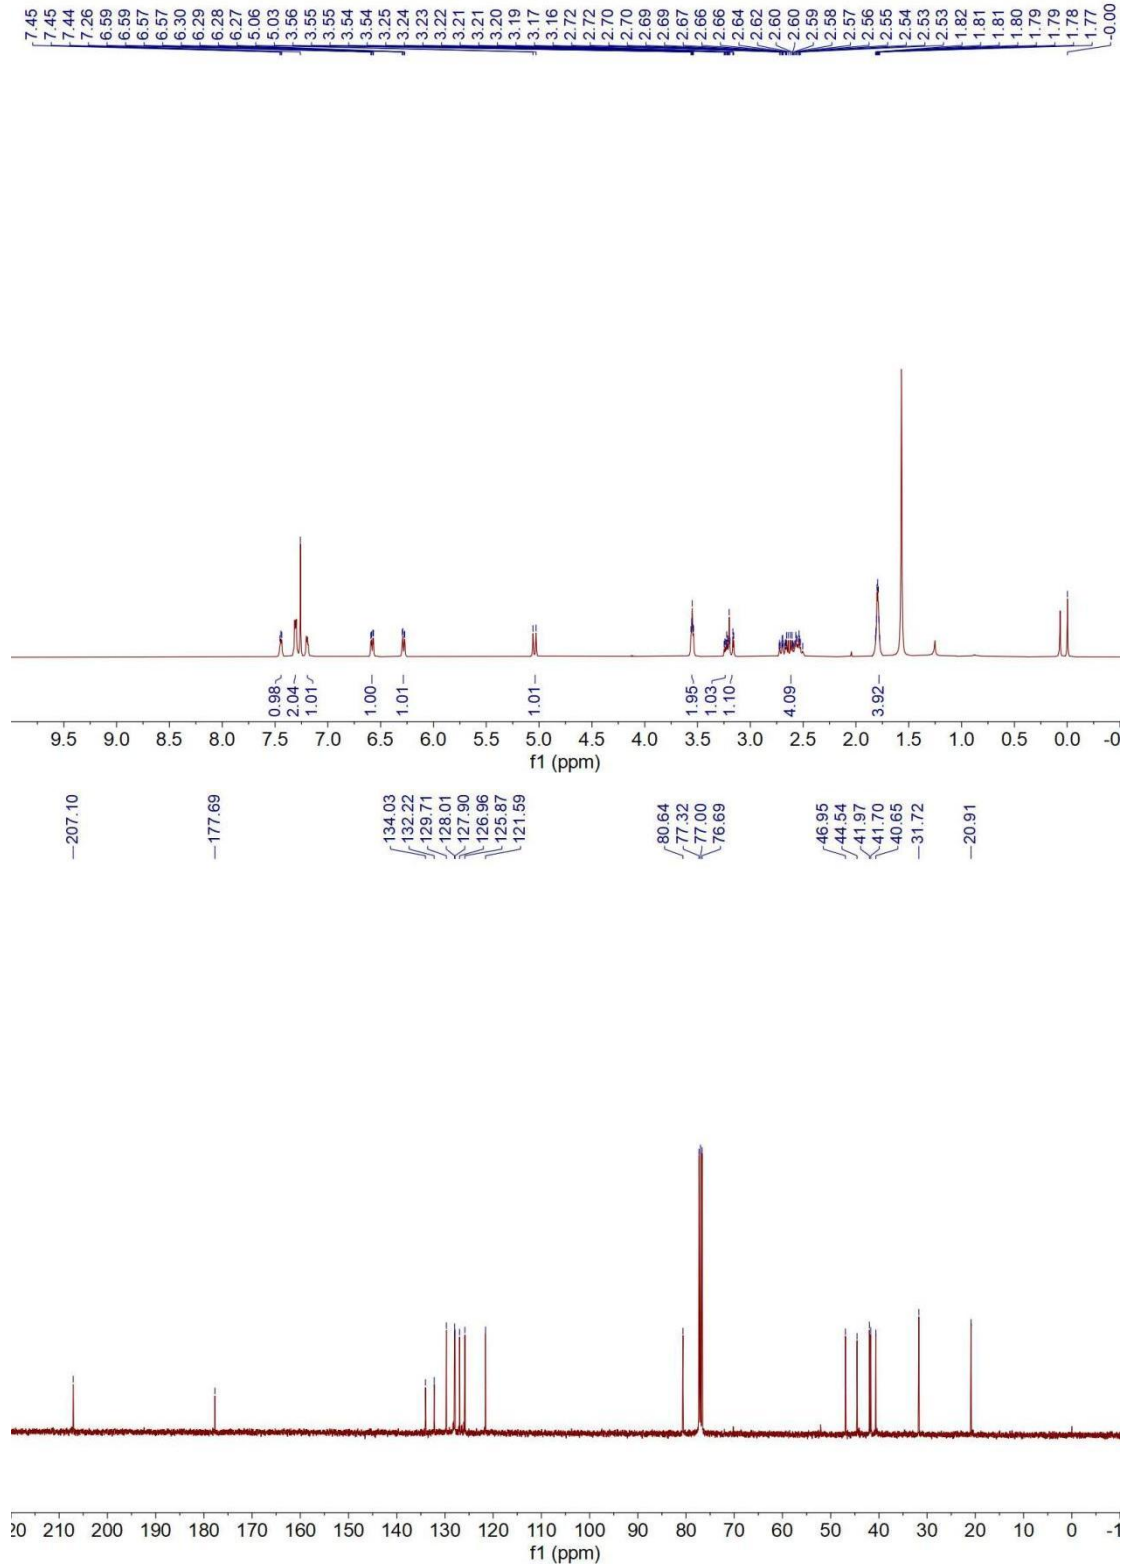

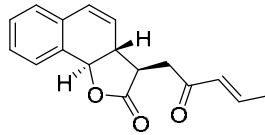

(*R,R,R*)-**31**

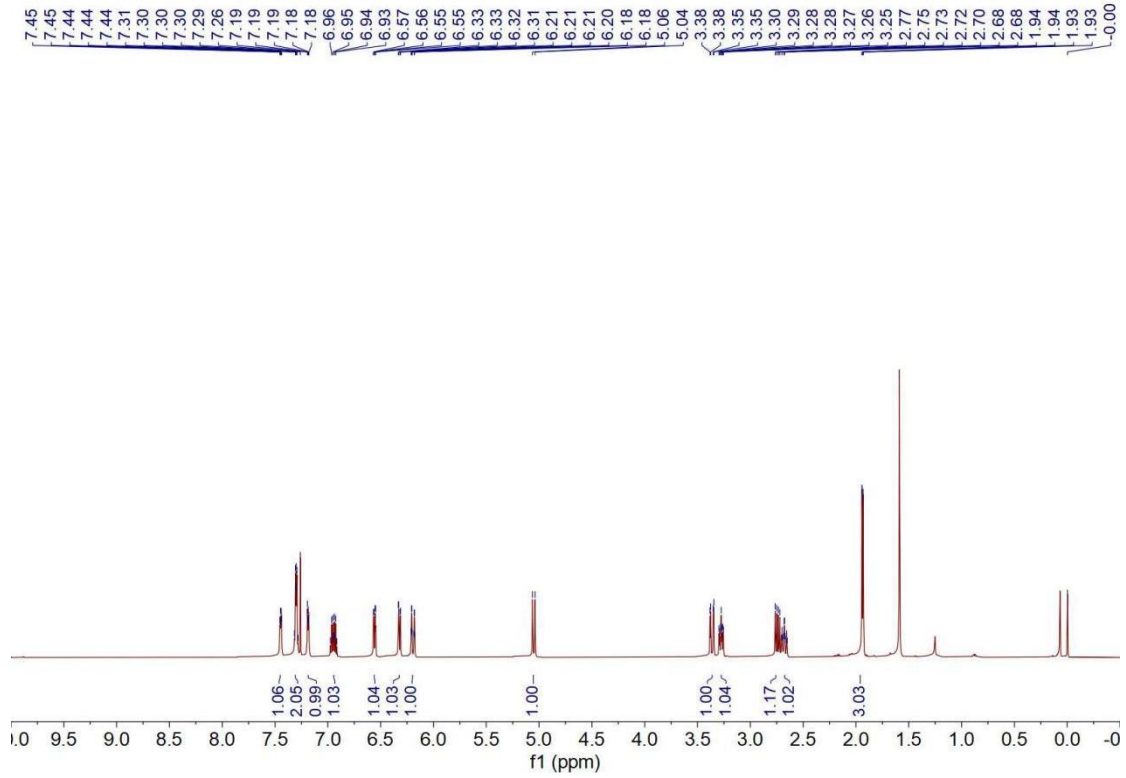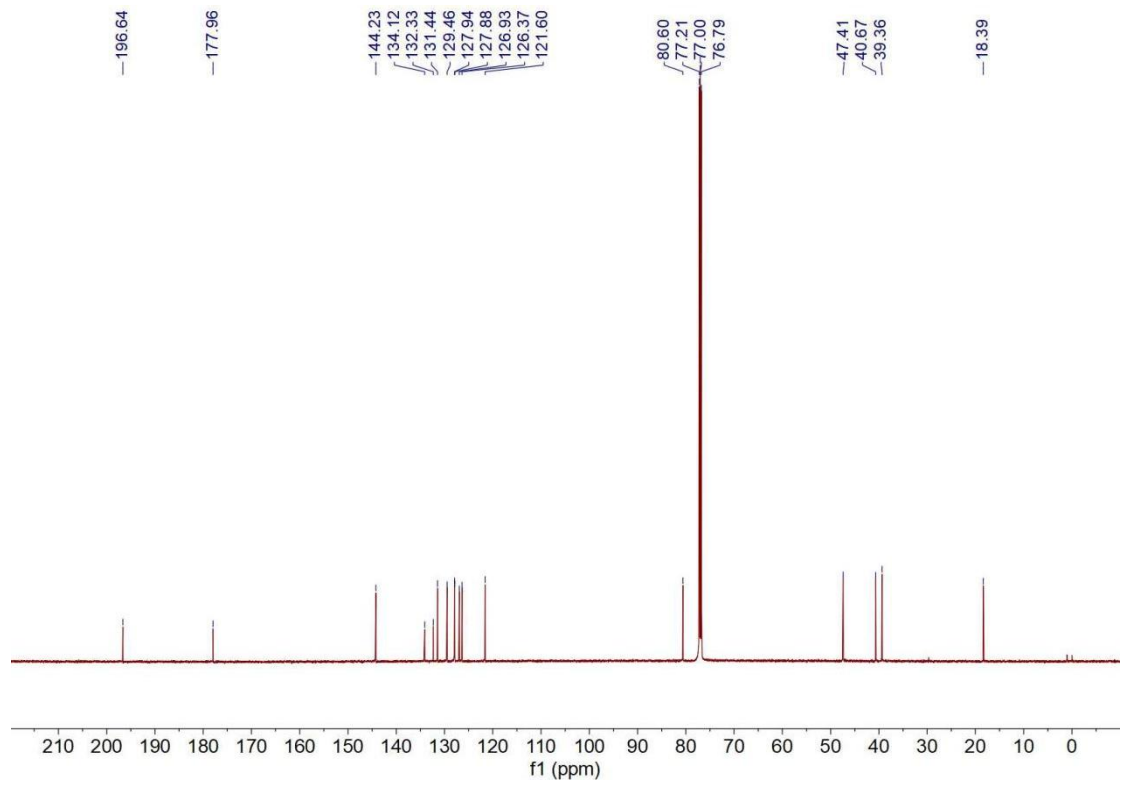

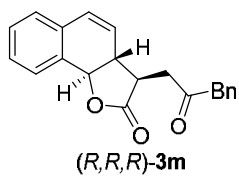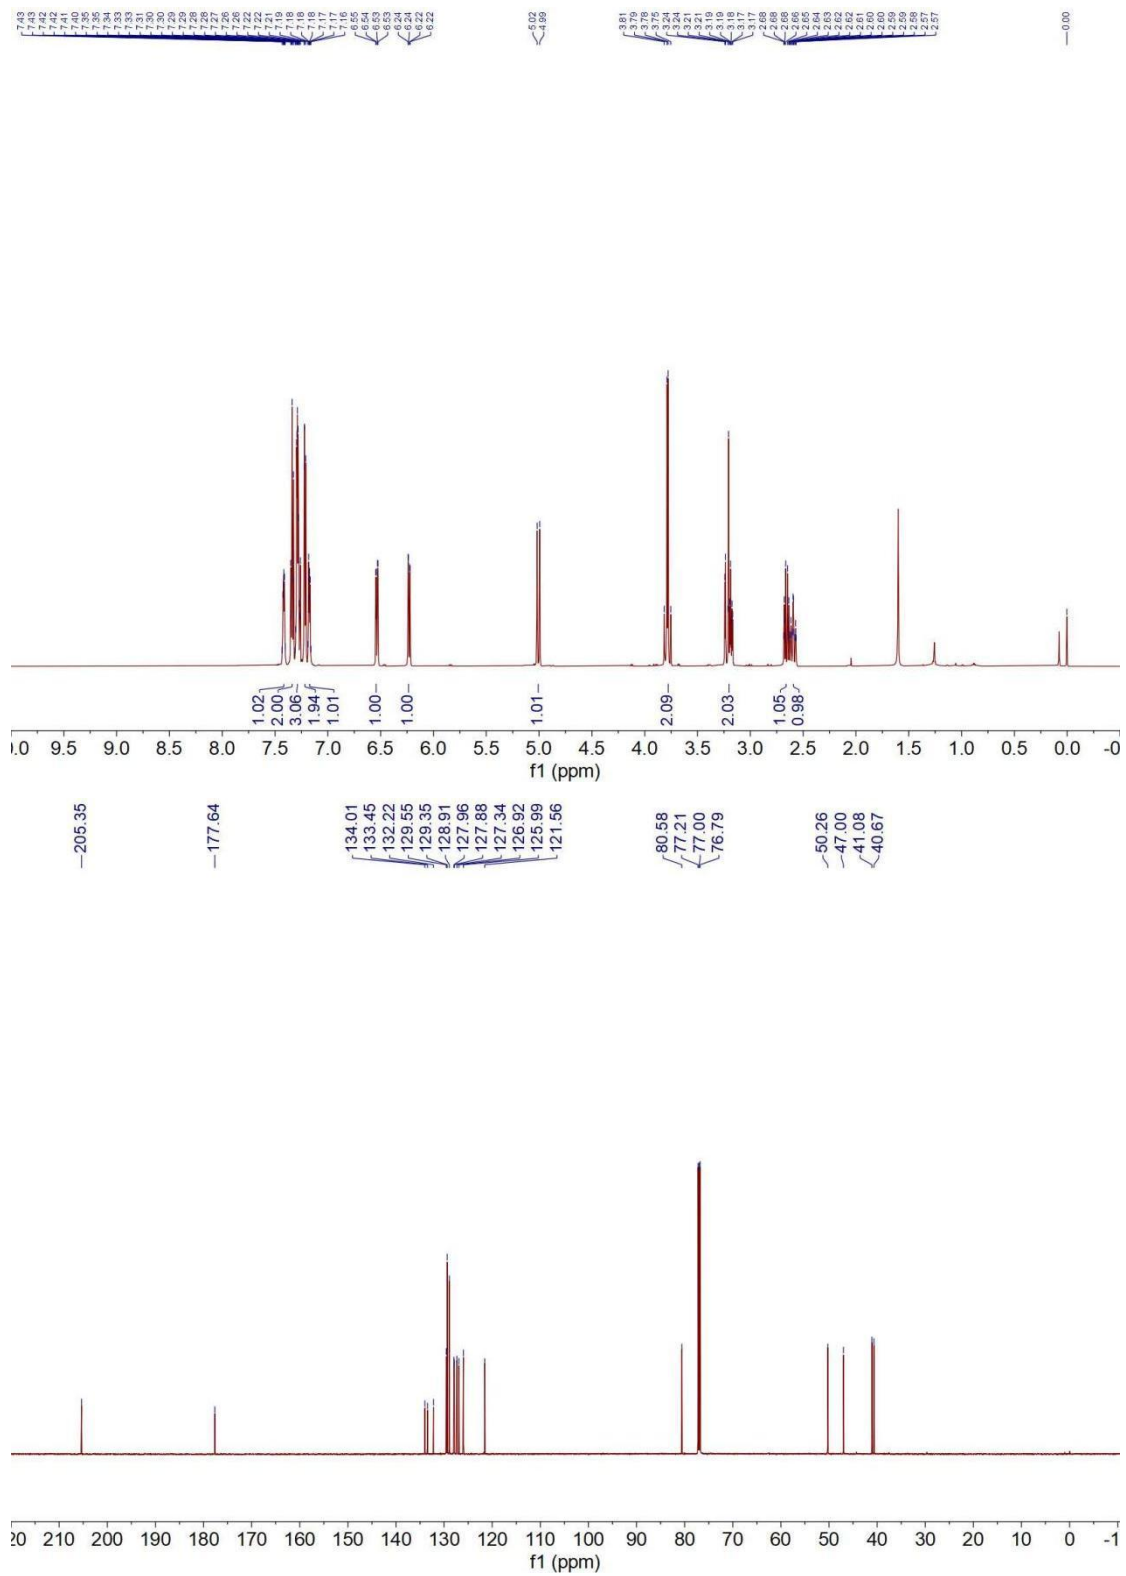

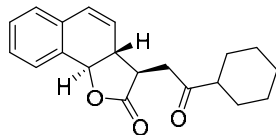

(*R,R,R*)-**3n**

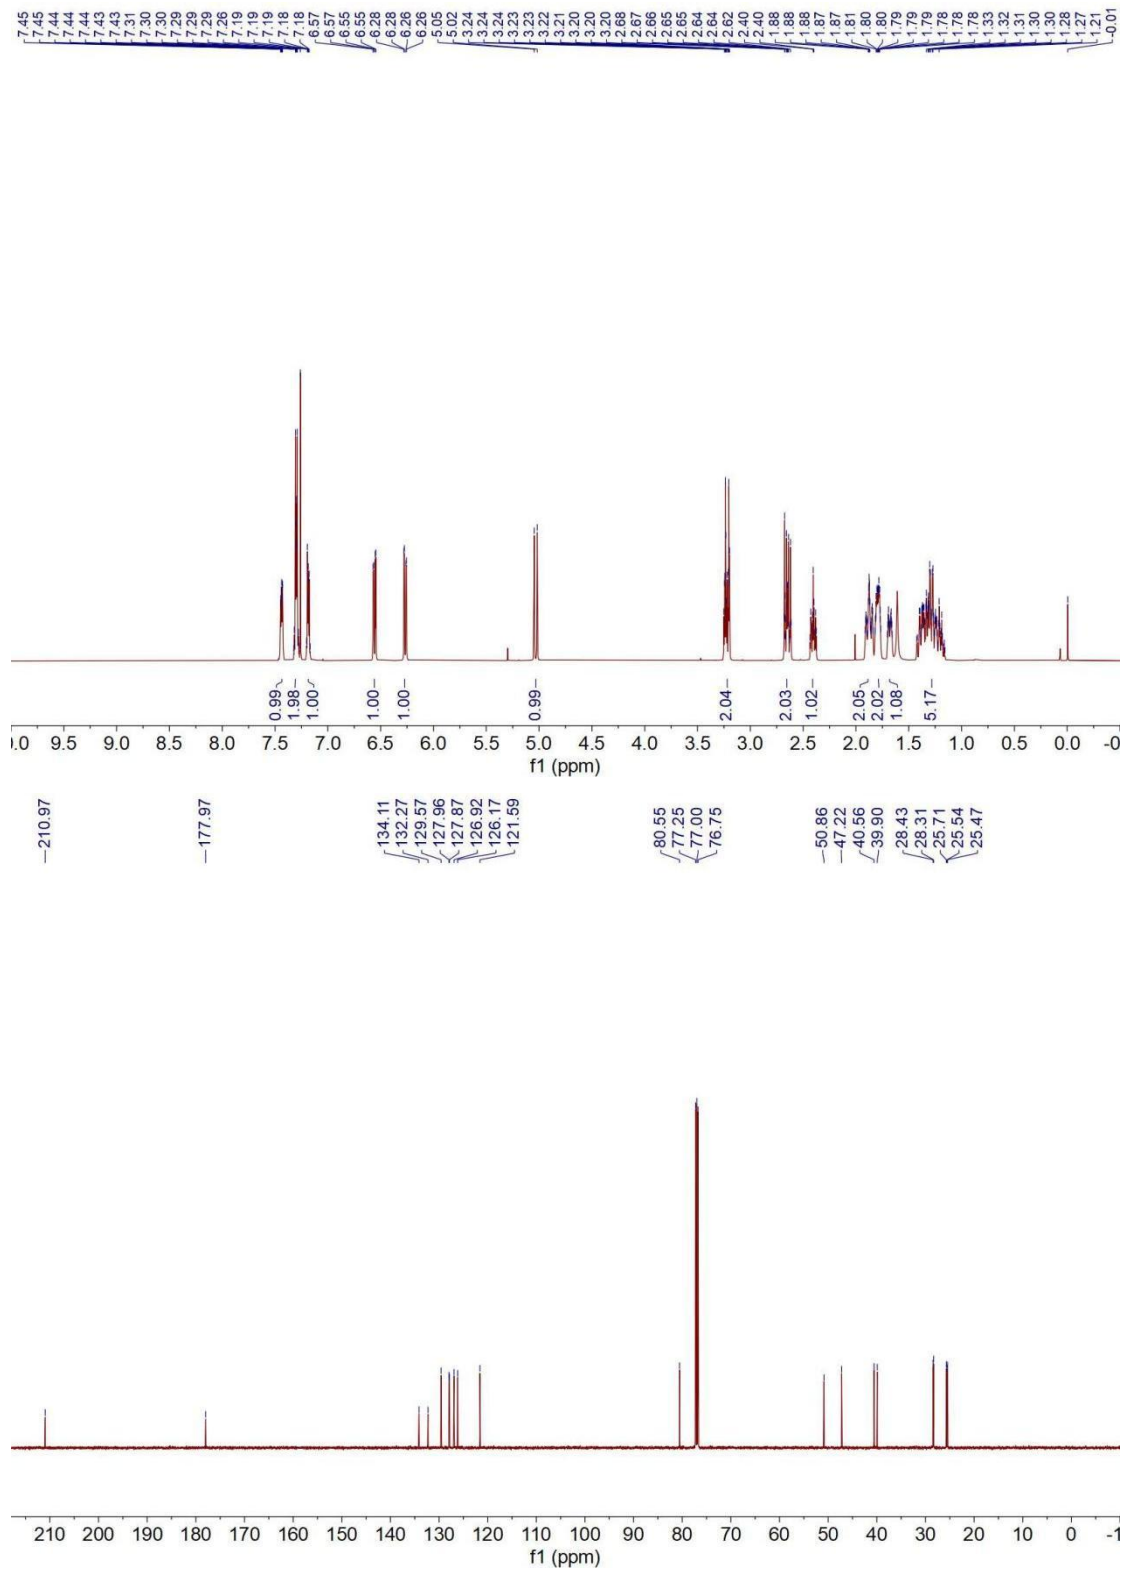

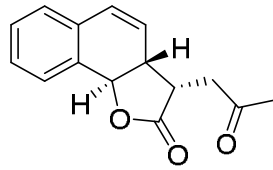

**(S,R,R)-4a**

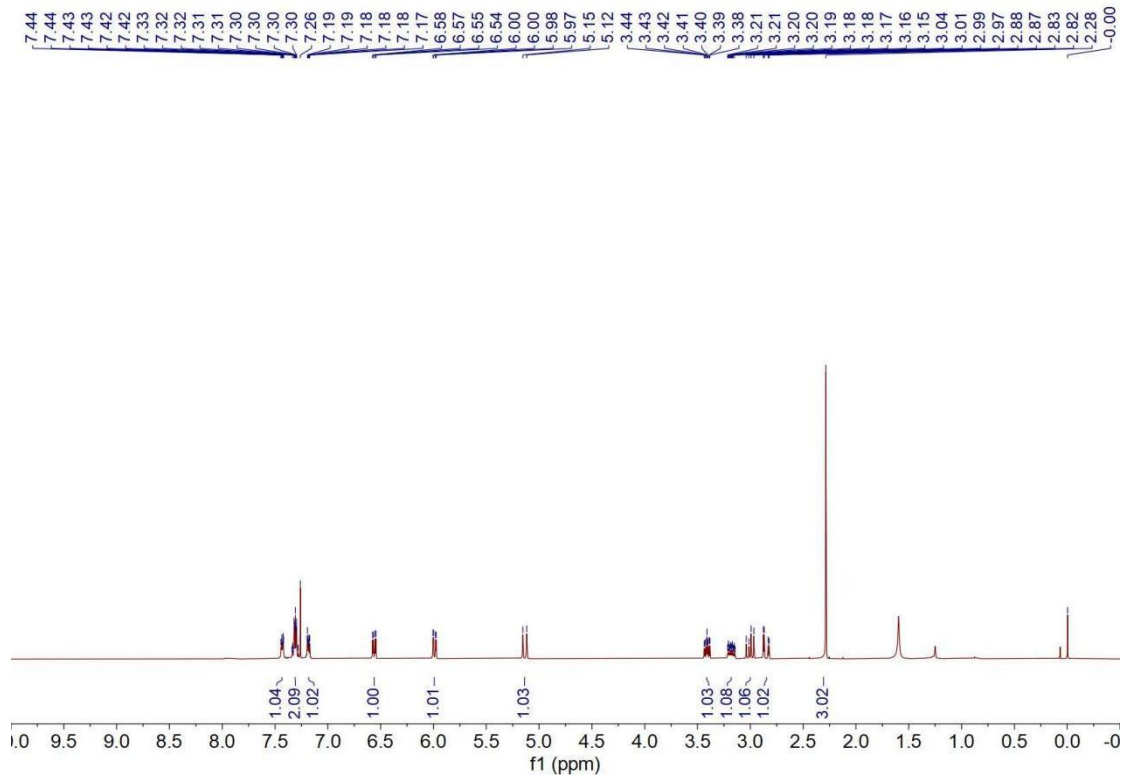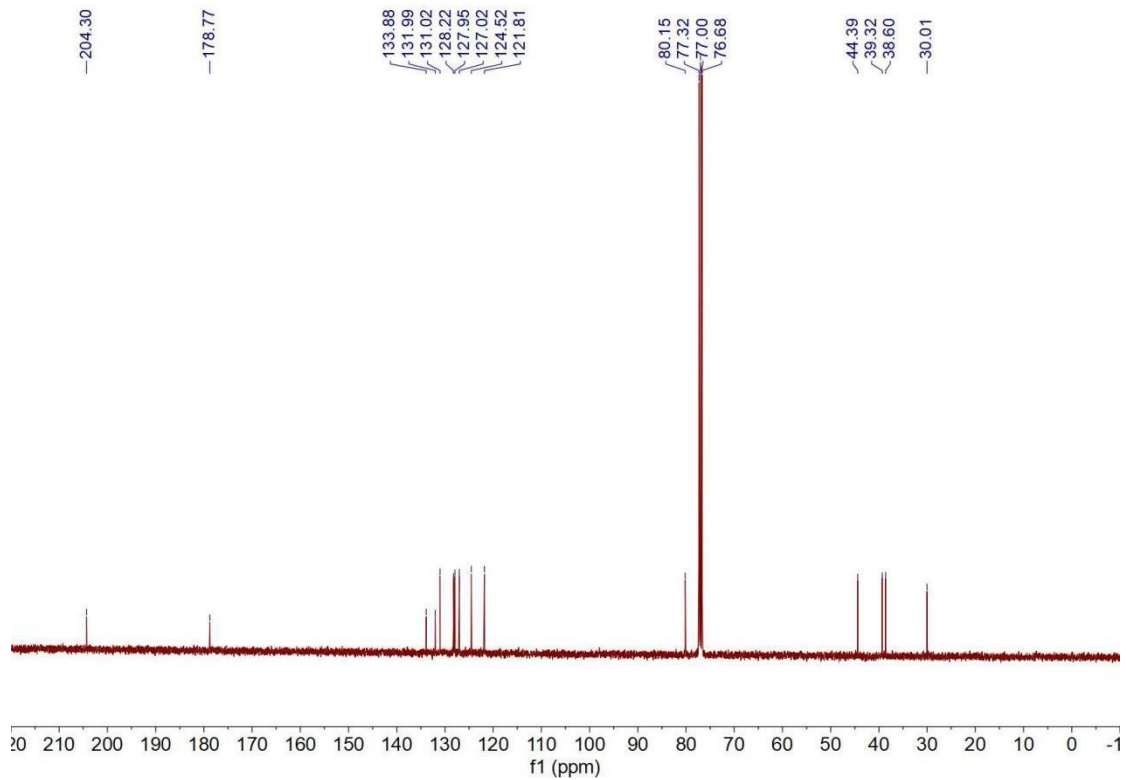

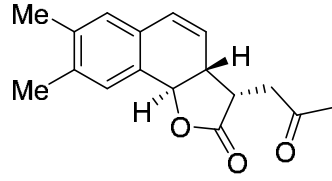

(S,R,R)-4b

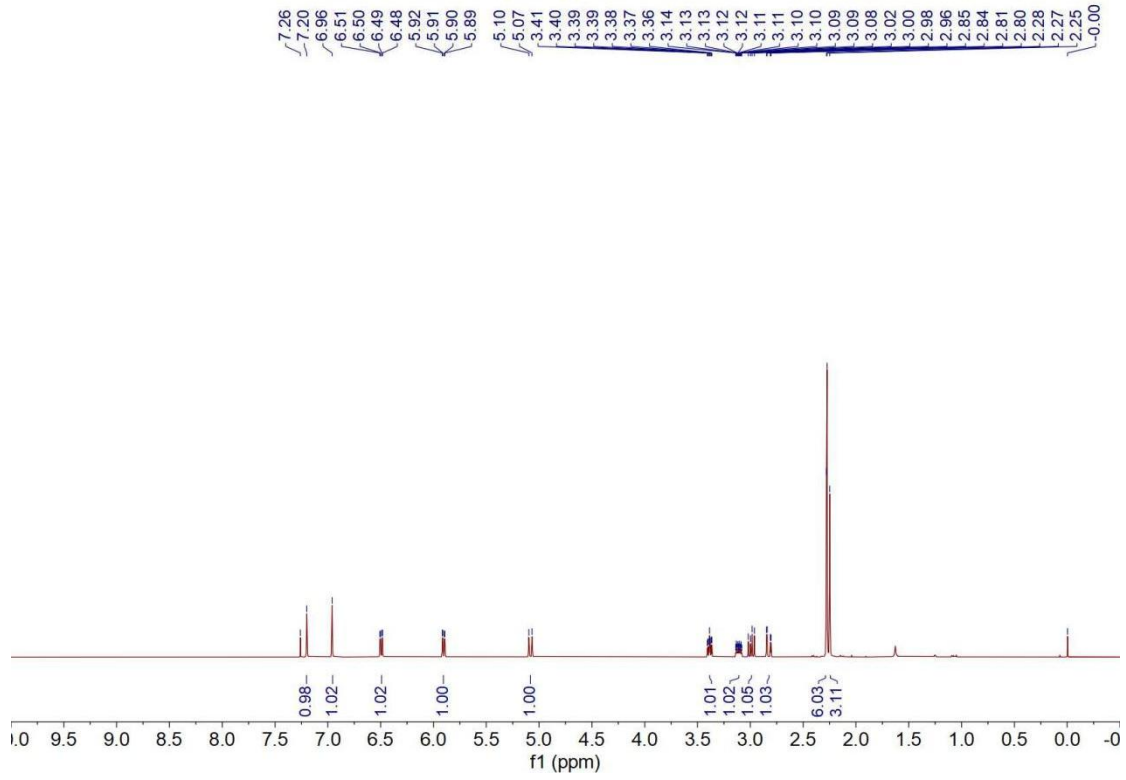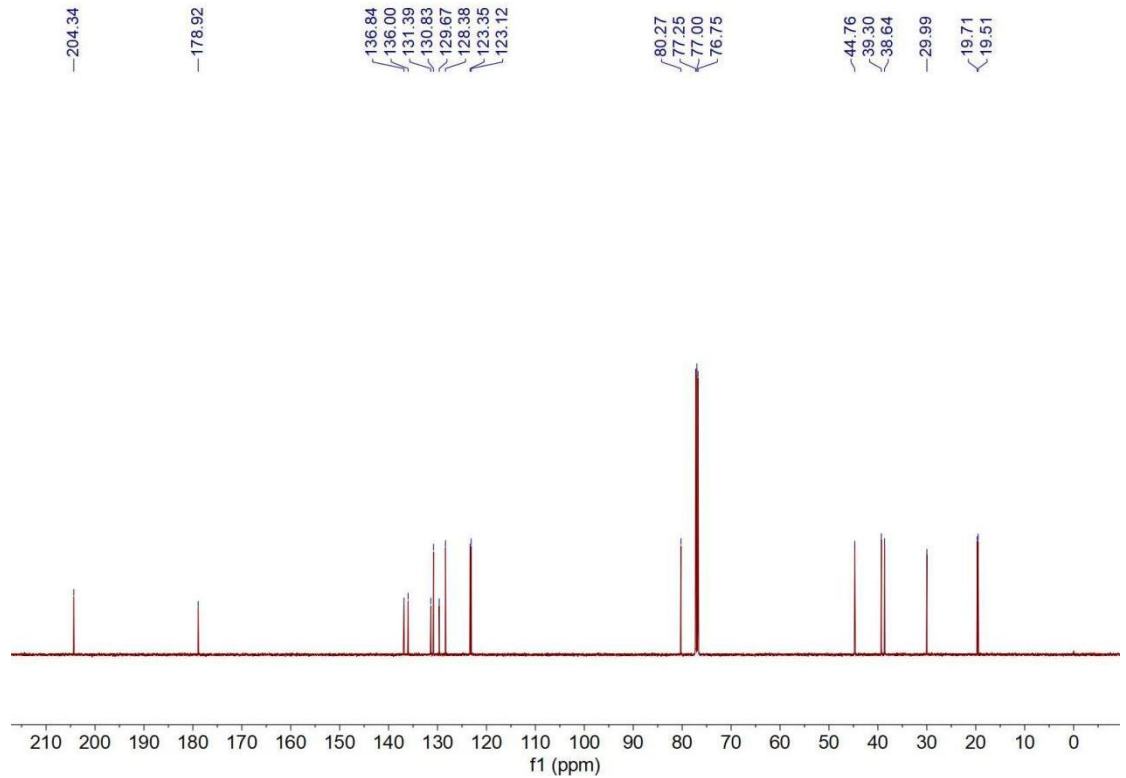

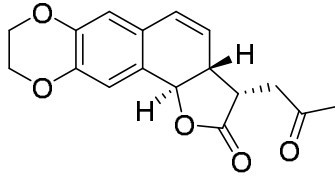

(*S,R,R*)-4d

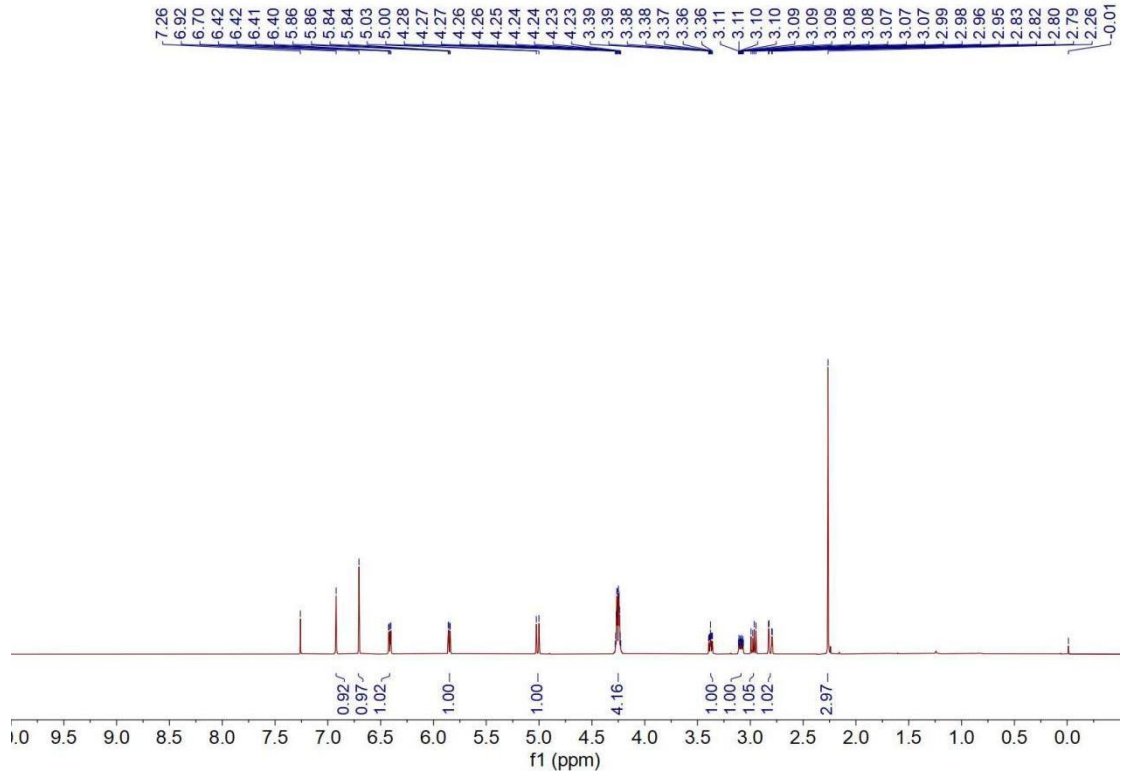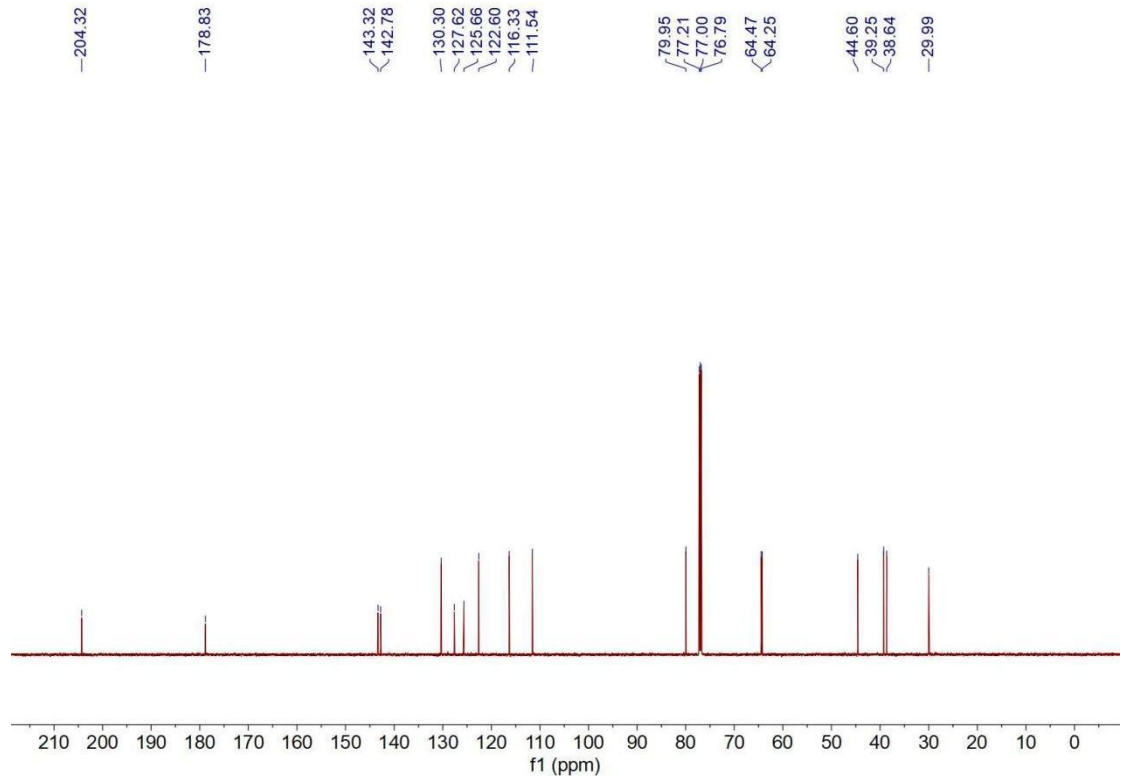

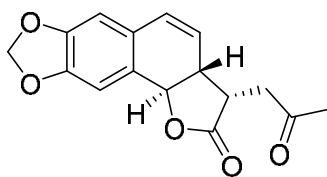

(*S,R,R*)-**4e**

7.26  
6.93  
6.68  
6.43  
6.43  
6.41  
6.41  
5.98  
5.97  
5.97  
5.96  
5.90  
5.89  
5.88  
5.87  
5.03  
5.00  
3.40  
3.40  
3.39  
3.38  
3.37  
3.37  
3.36  
3.13  
3.12  
3.11  
3.11  
3.10  
3.10  
3.09  
3.09  
3.08  
3.08  
3.02  
2.99  
2.98  
2.96  
2.84  
2.83  
2.80  
2.27  
0.01

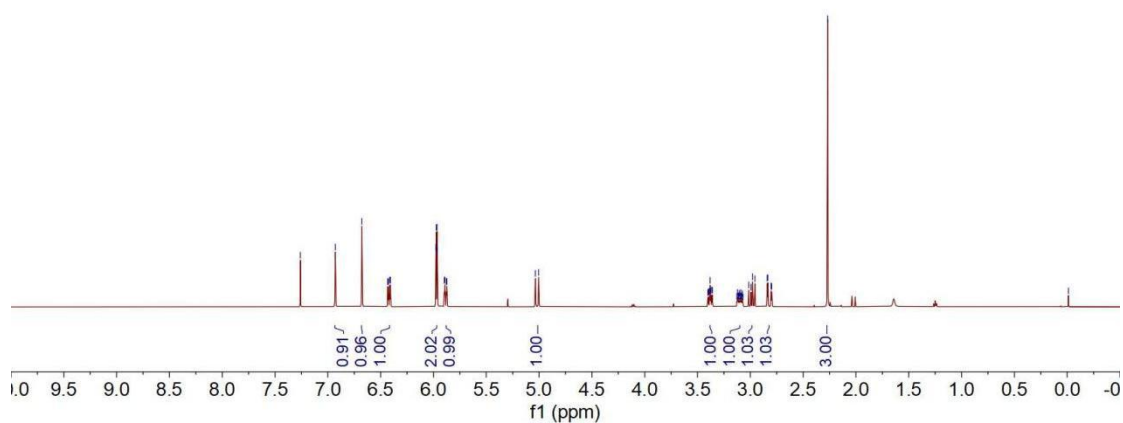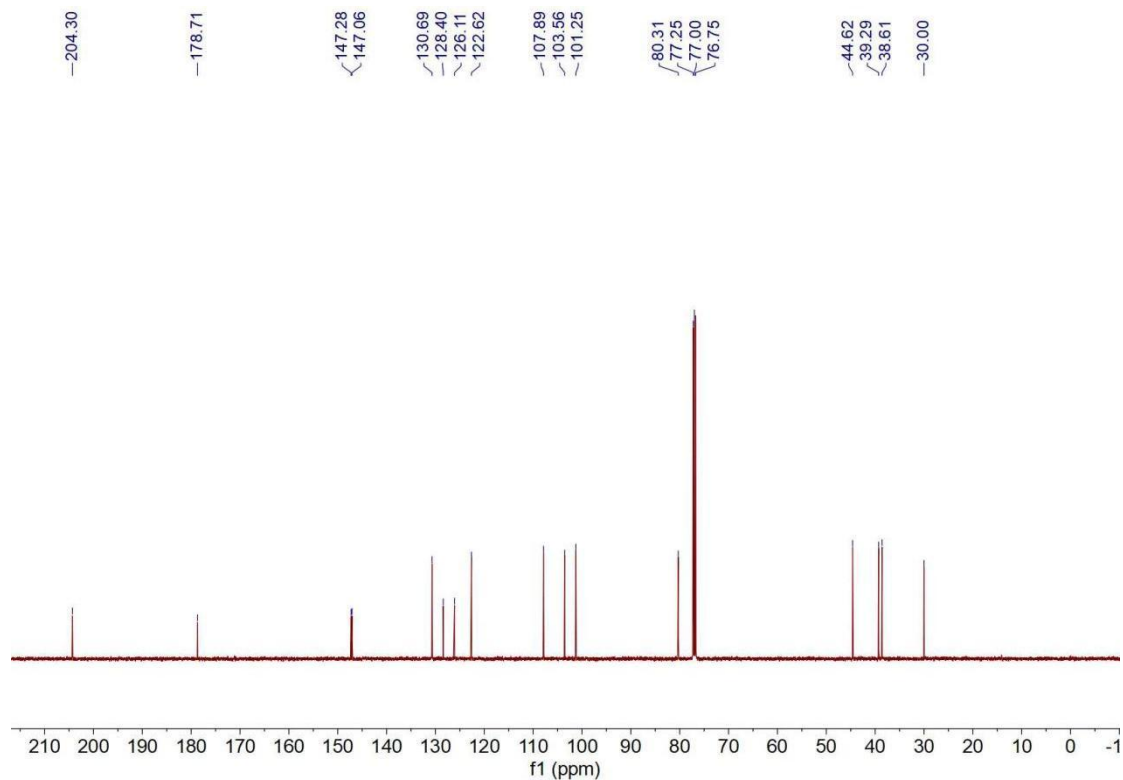

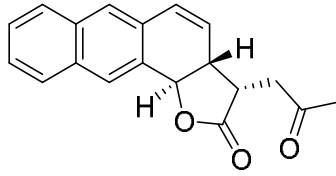

(S,R,R)-4f

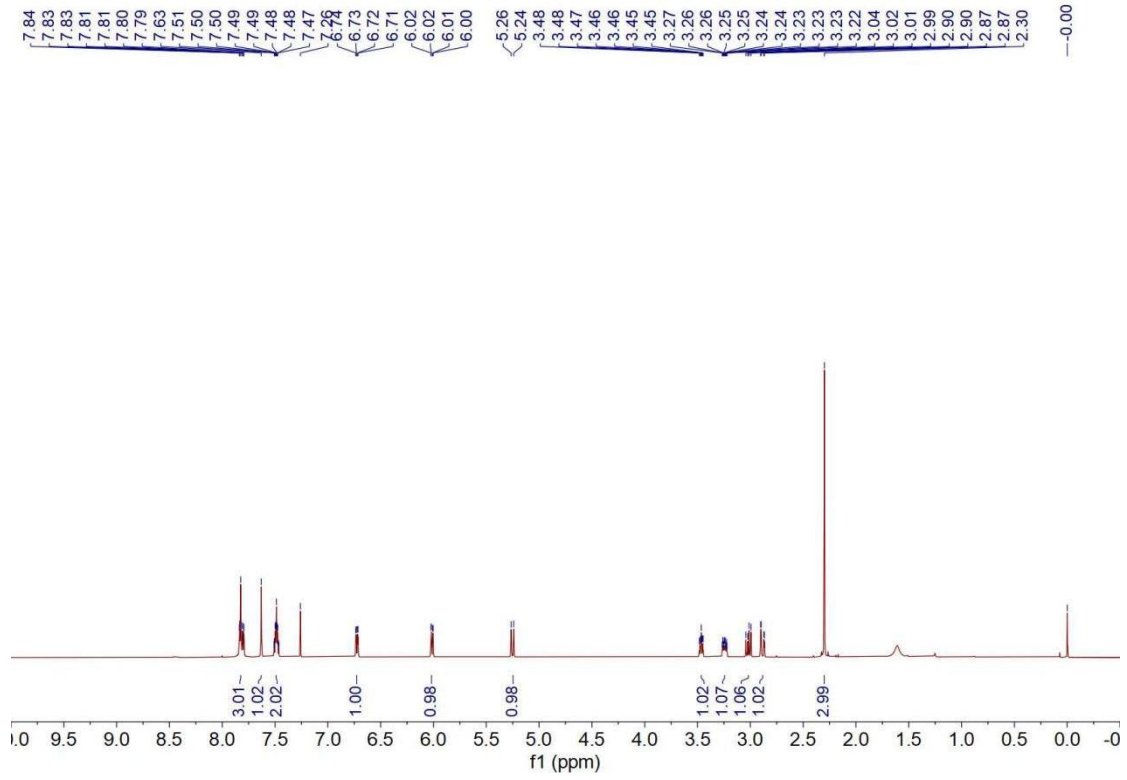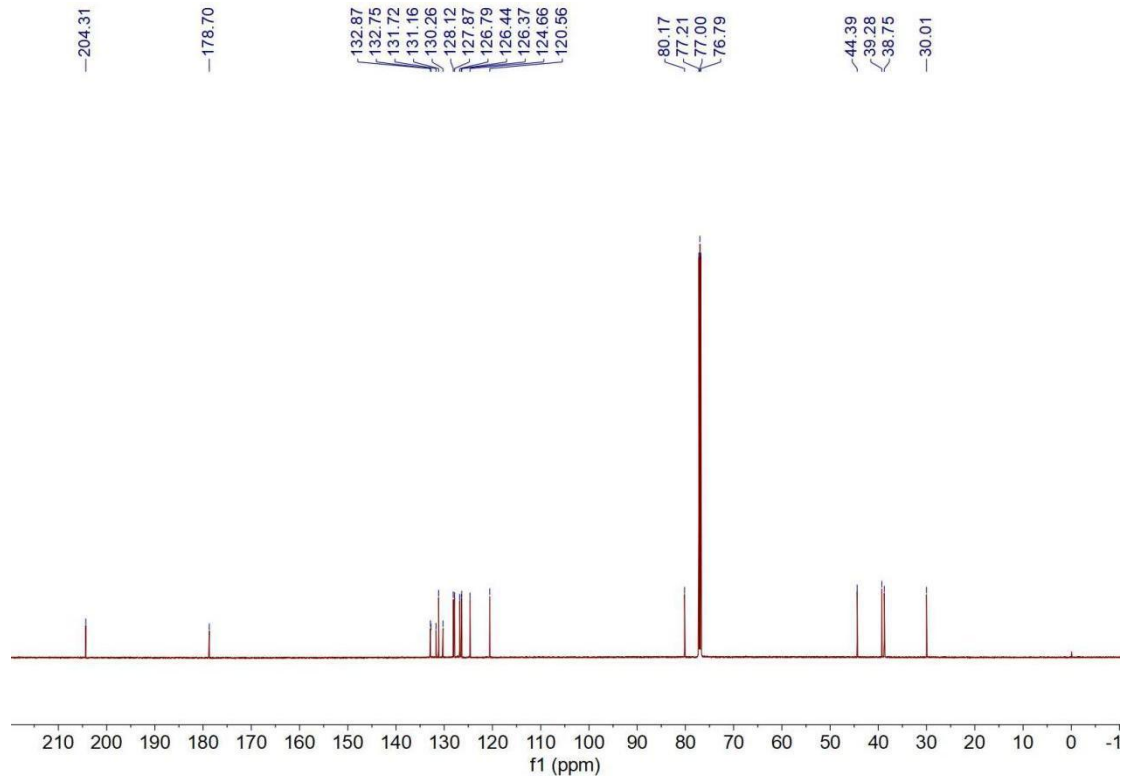

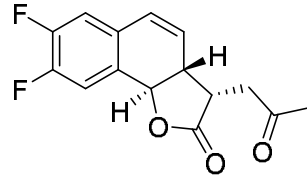

(S,R,R)-4g

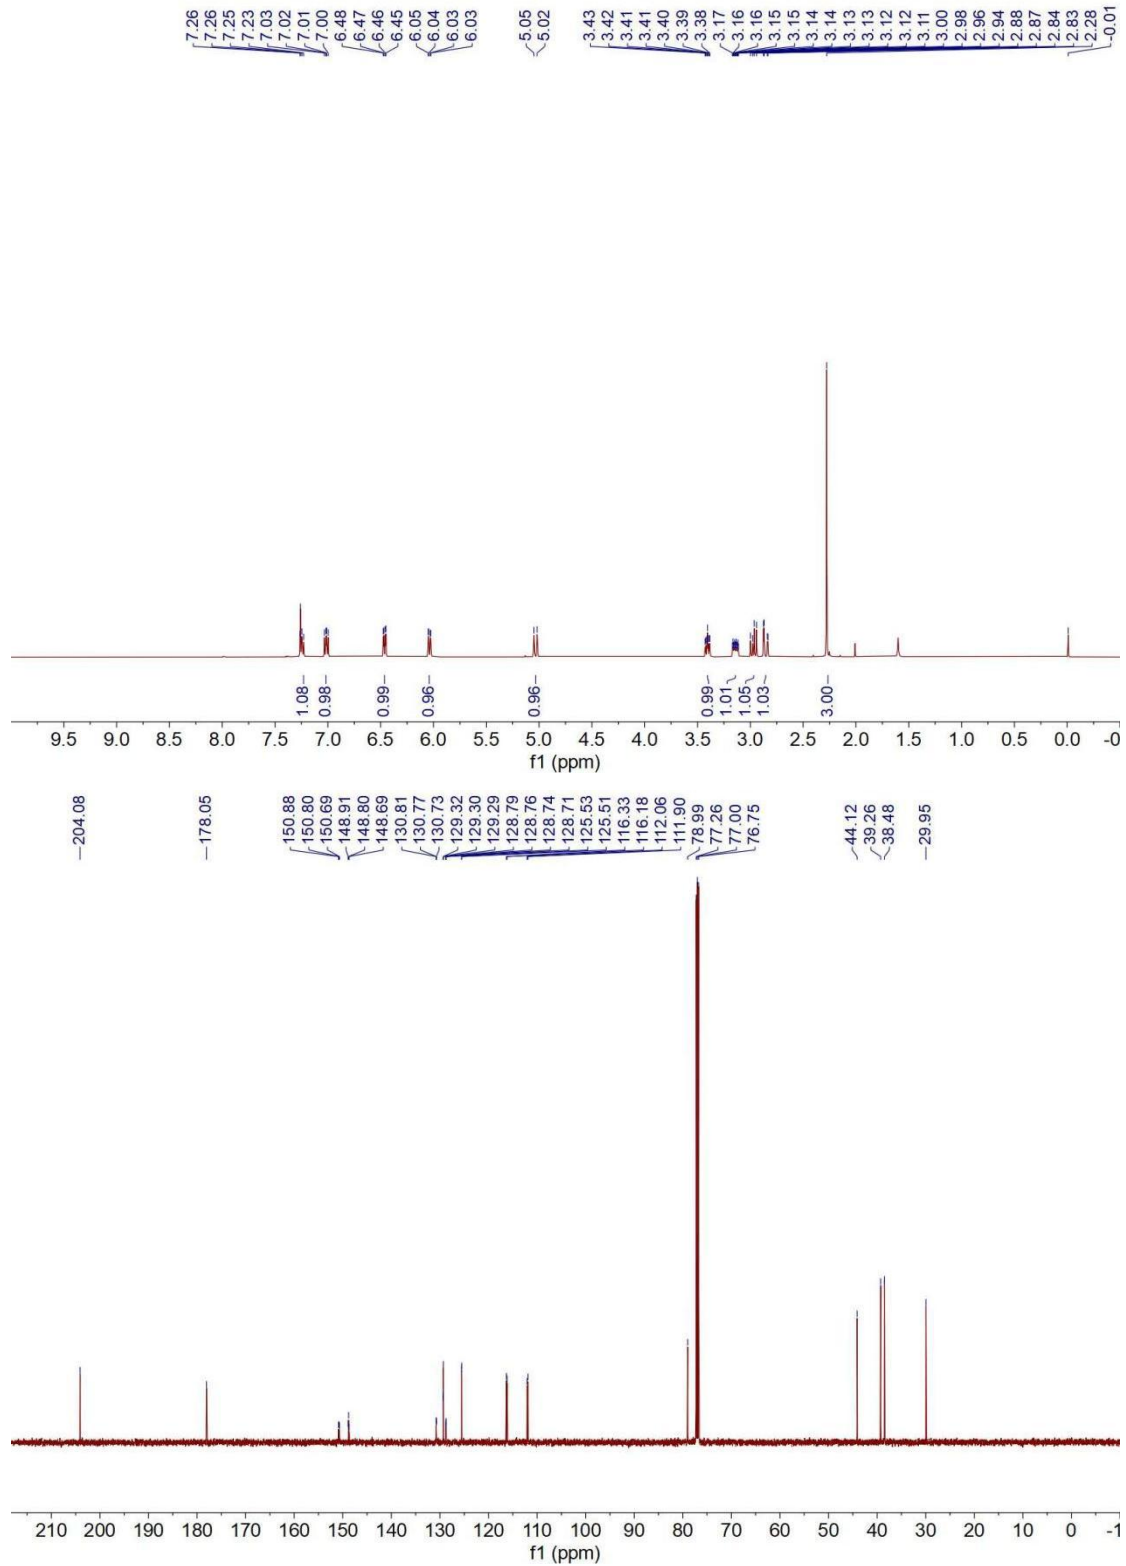

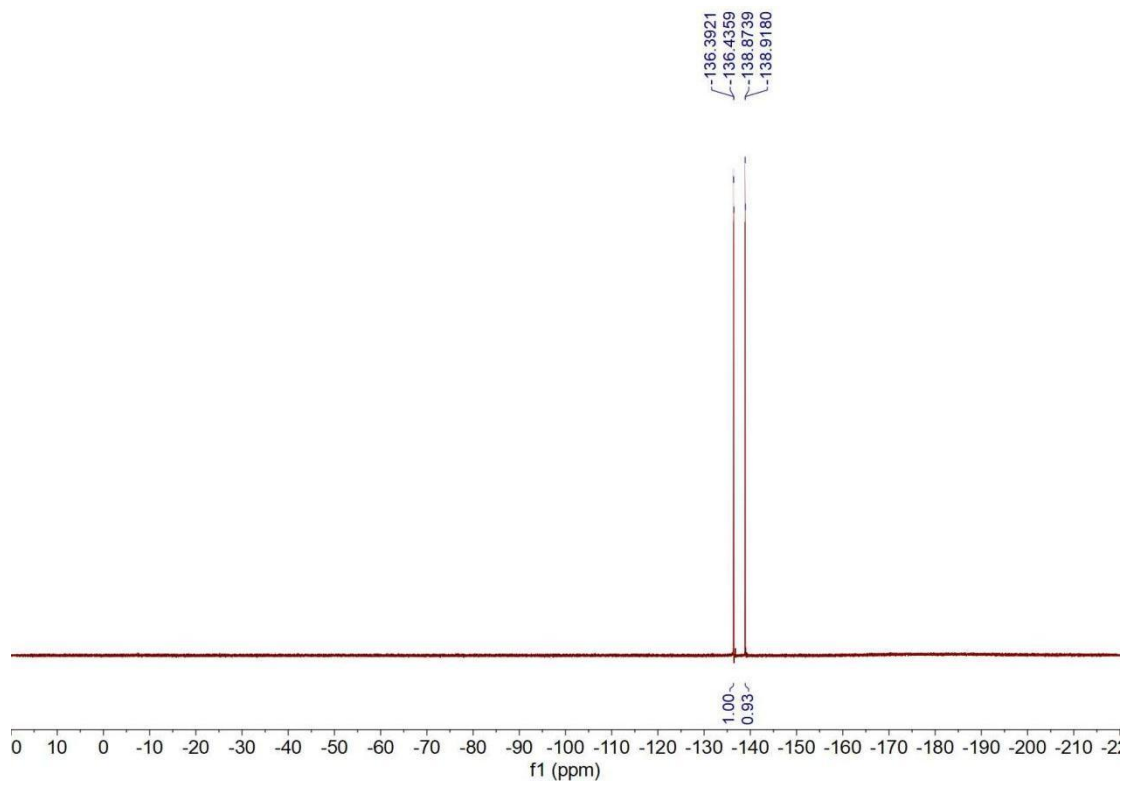

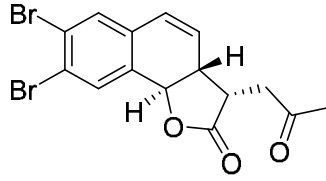

(S,R,R)-4h

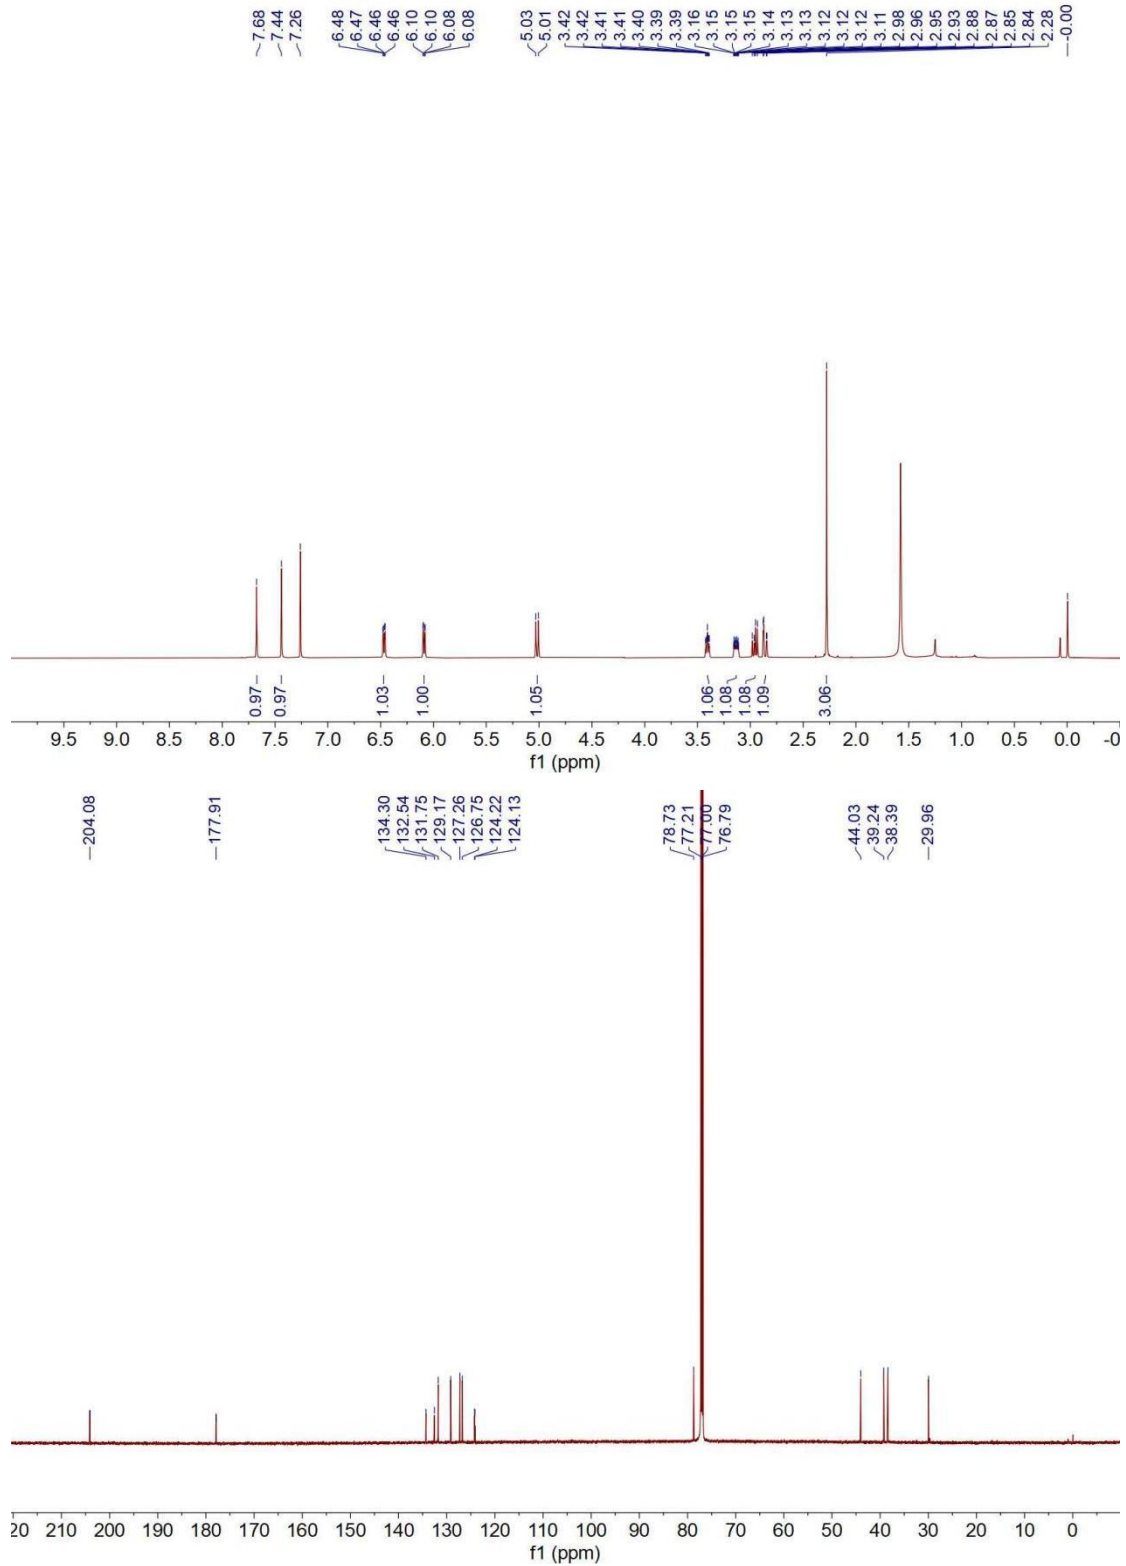

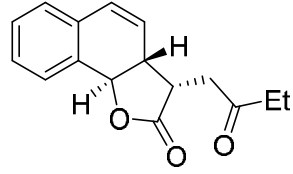

(*S,R,R*)-4i

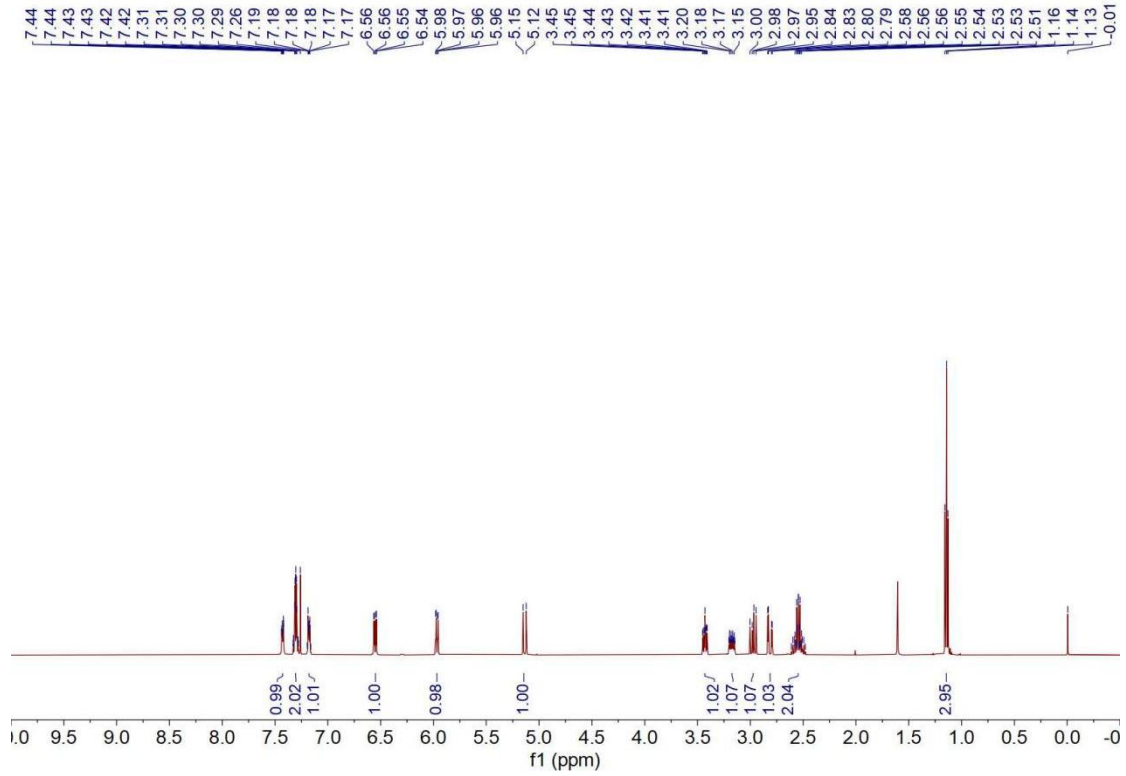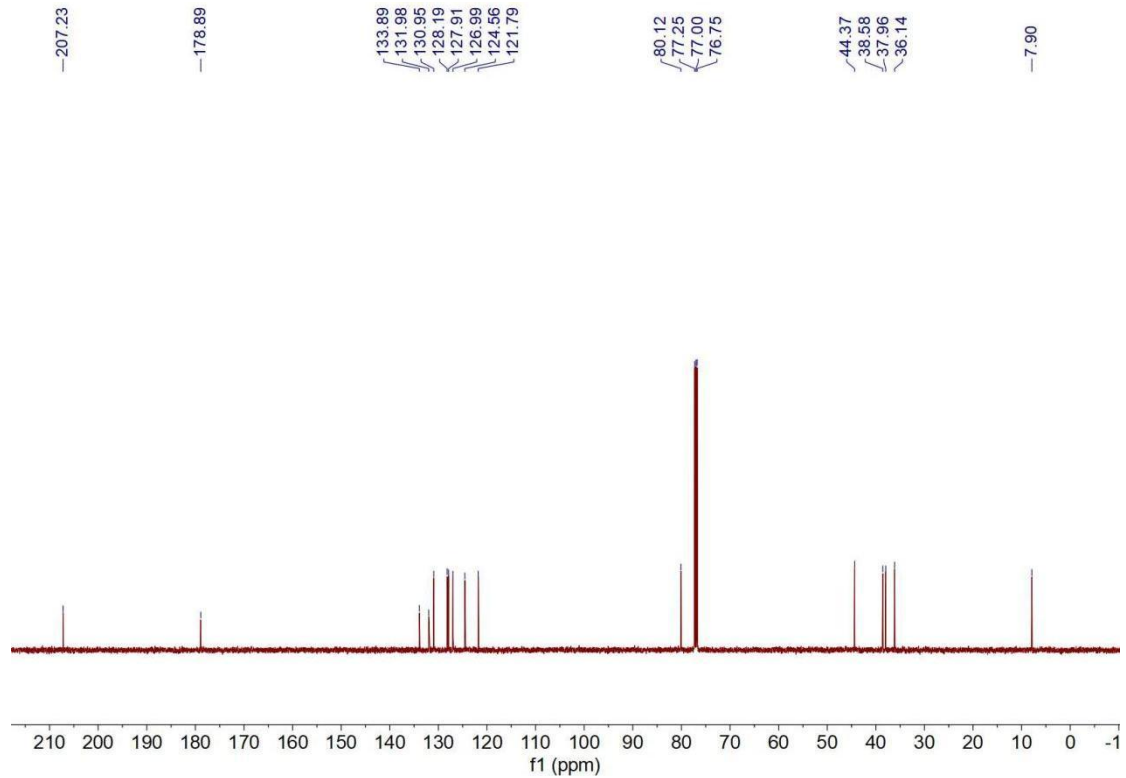

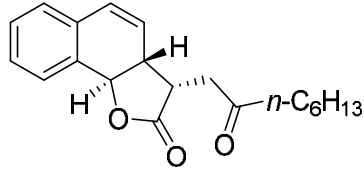

(*S,R,R*)-4j

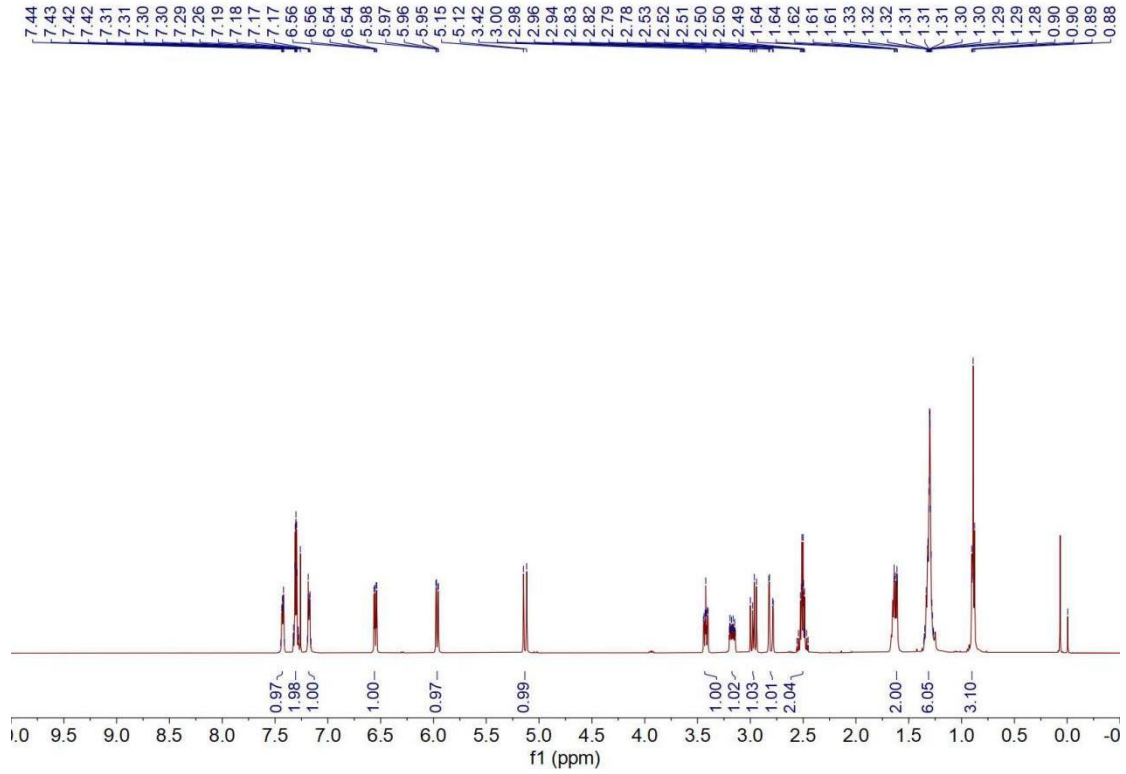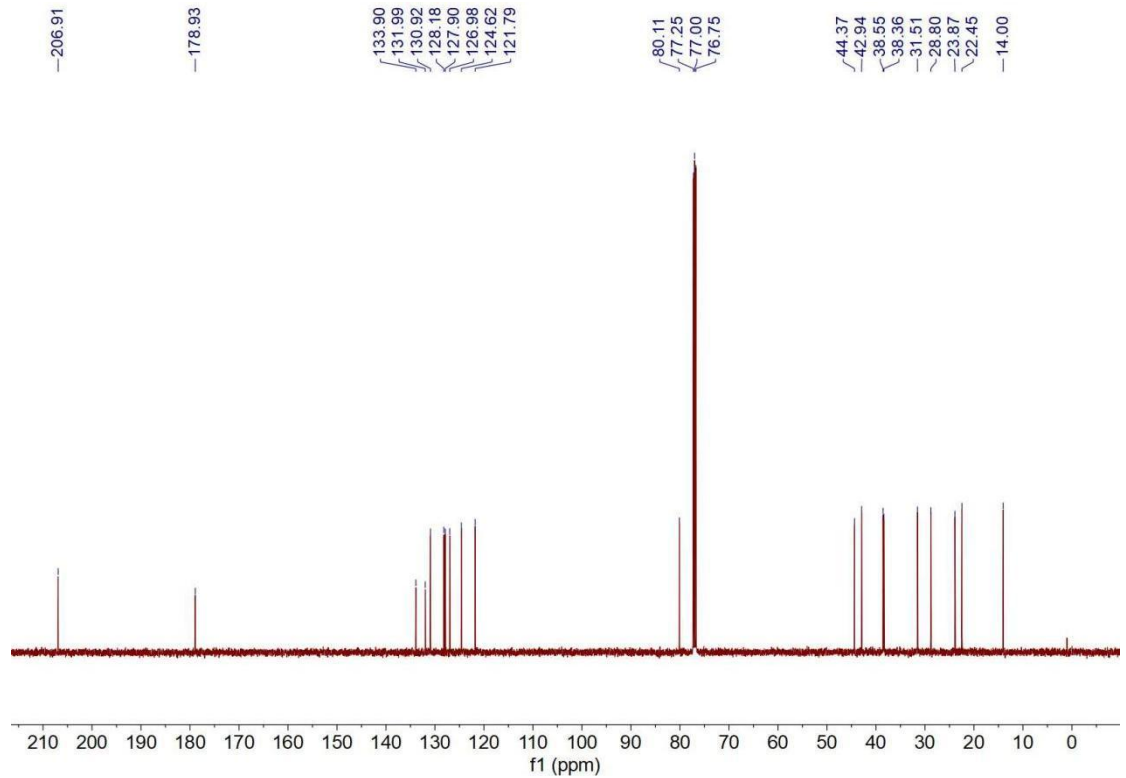

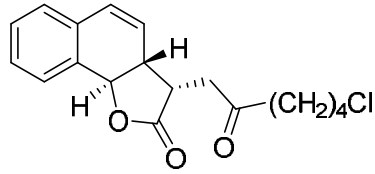

(S,R,R)-4k

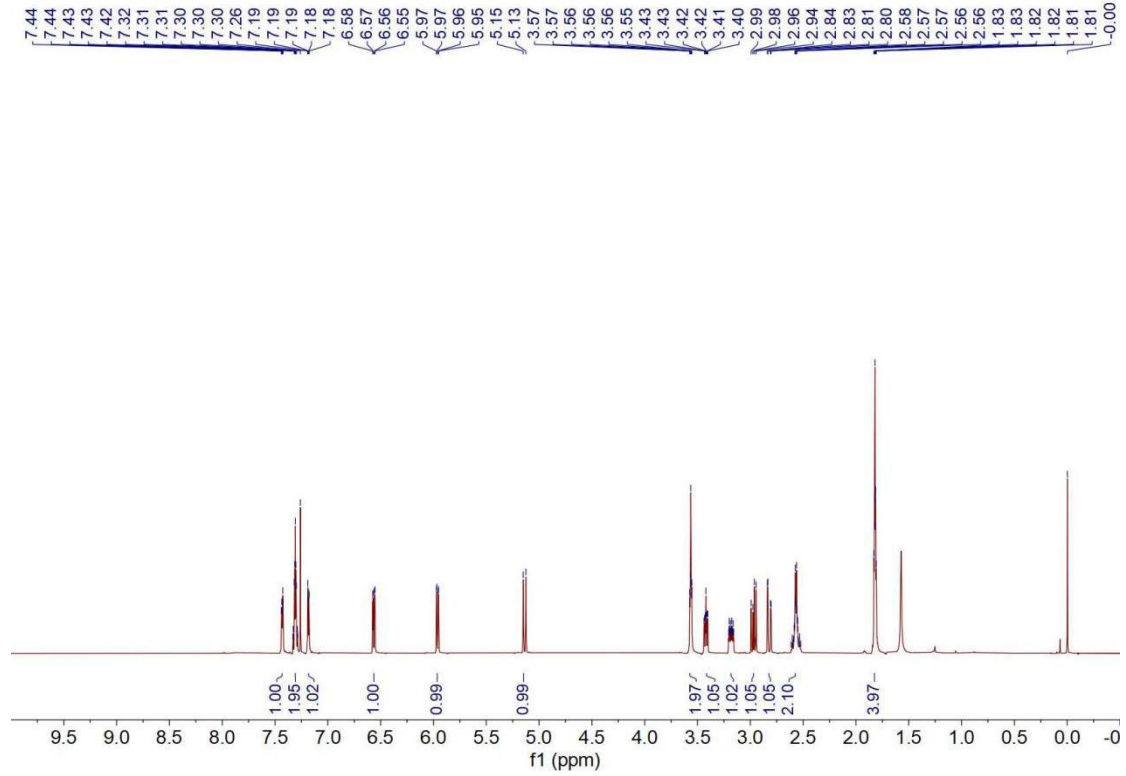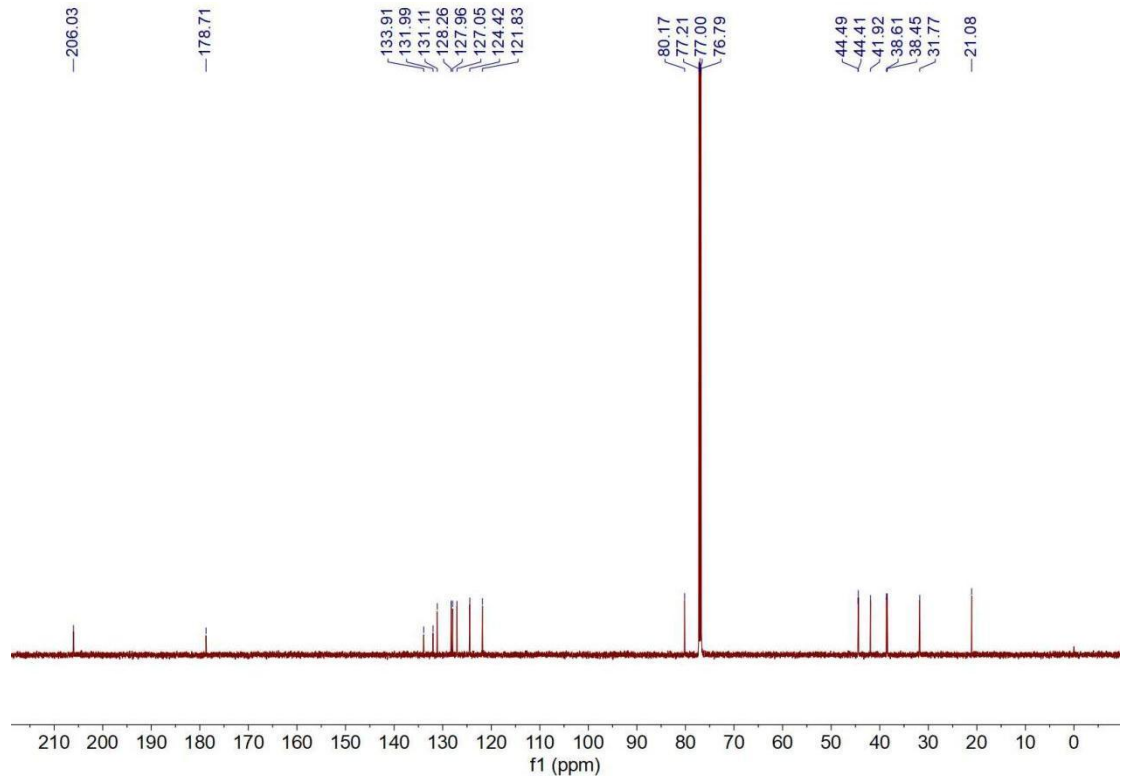

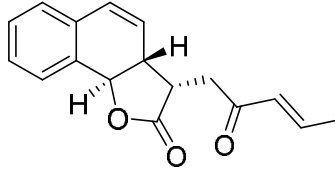

(*S,R,R*)-4I

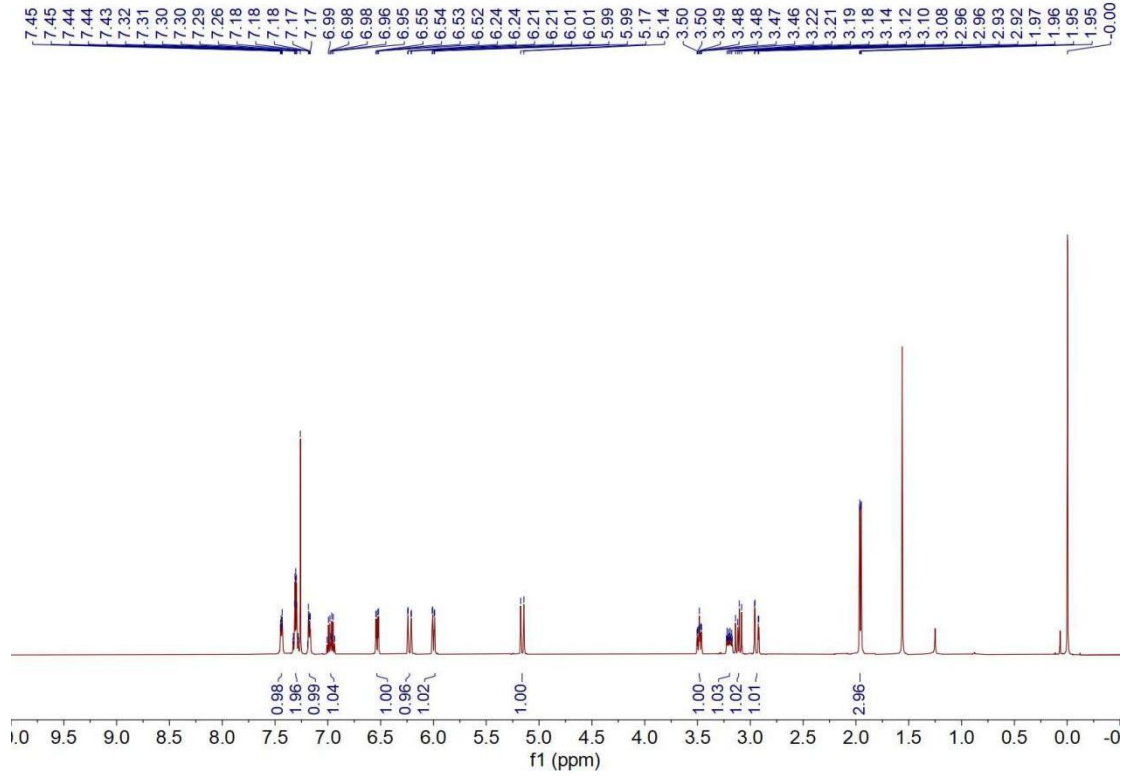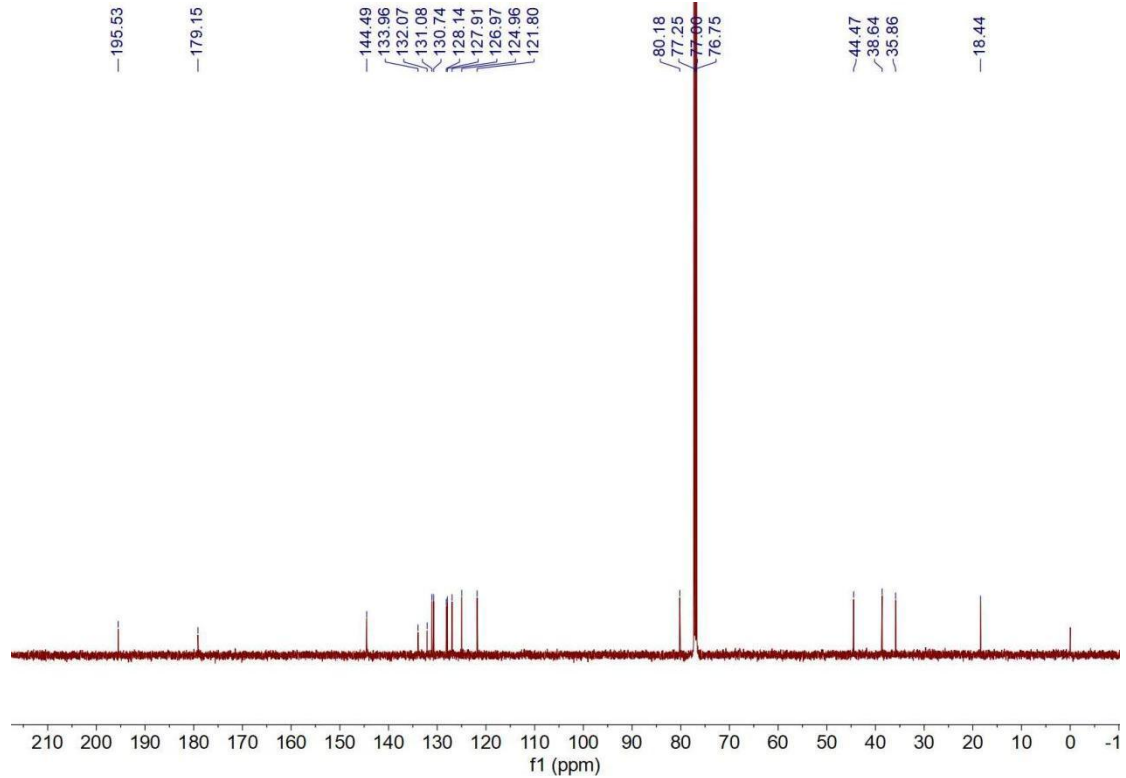

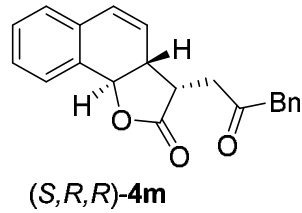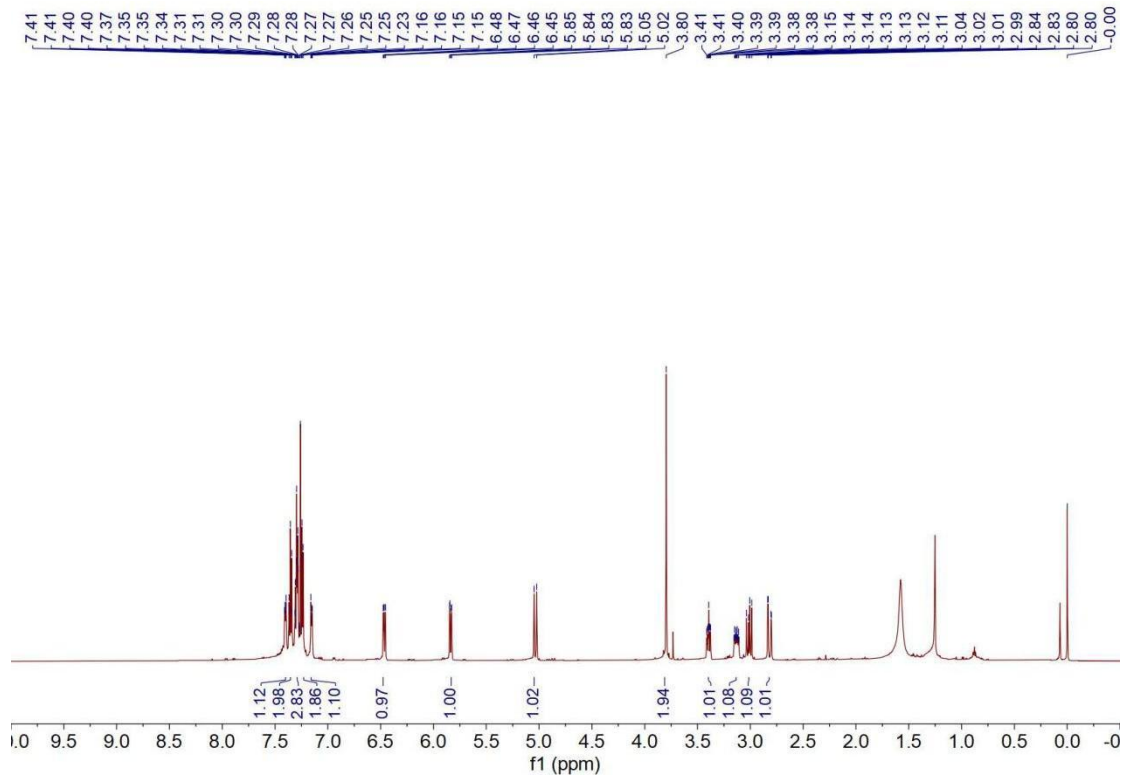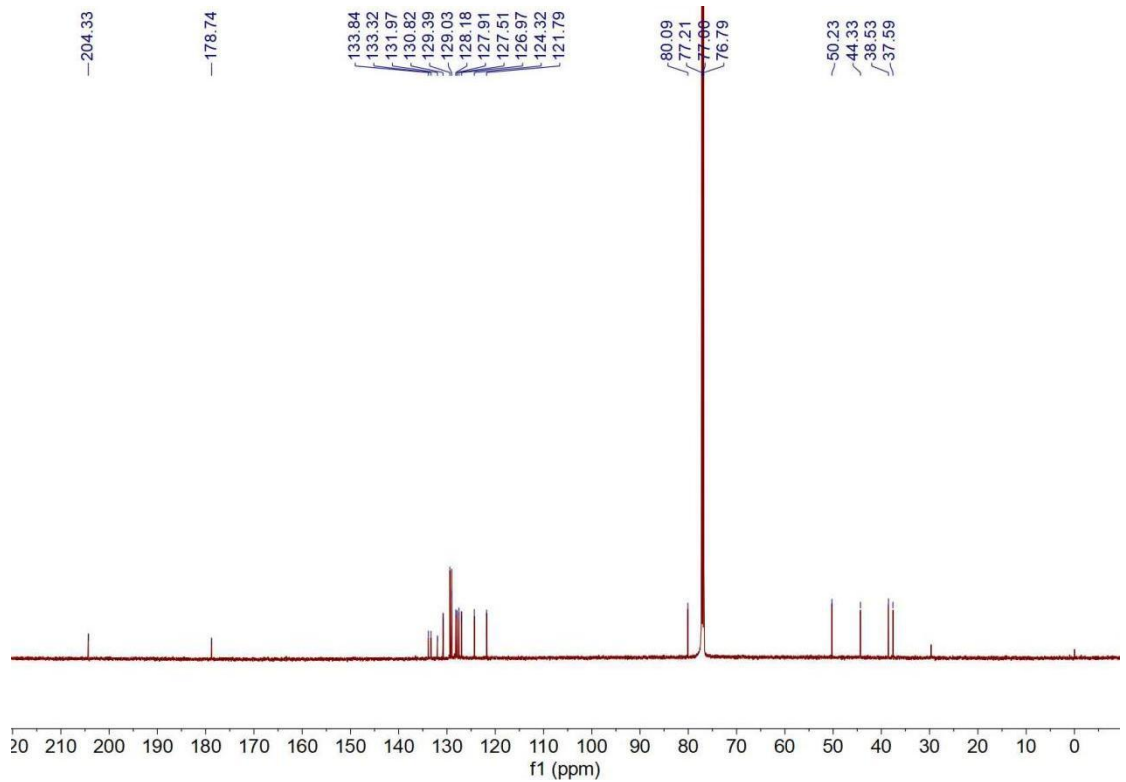

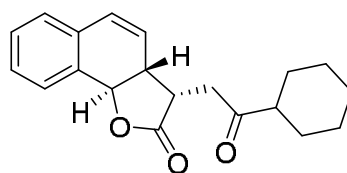

(*S,R,R*)-4n

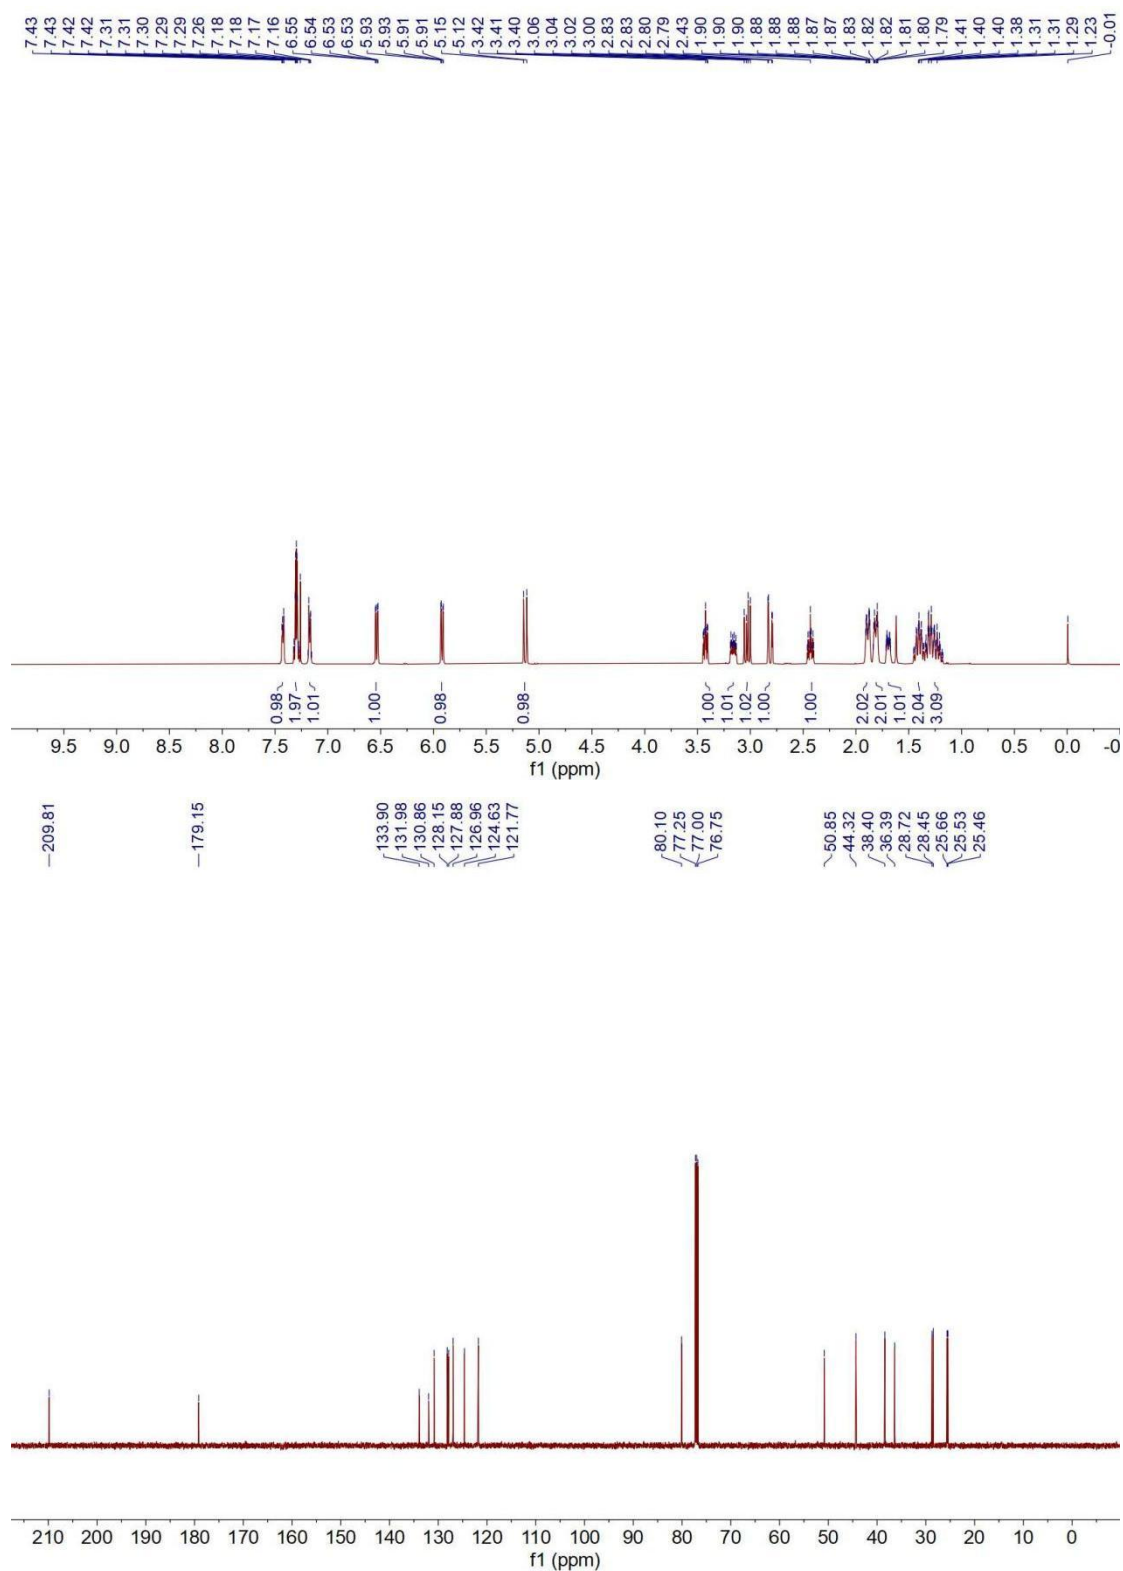

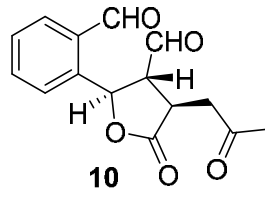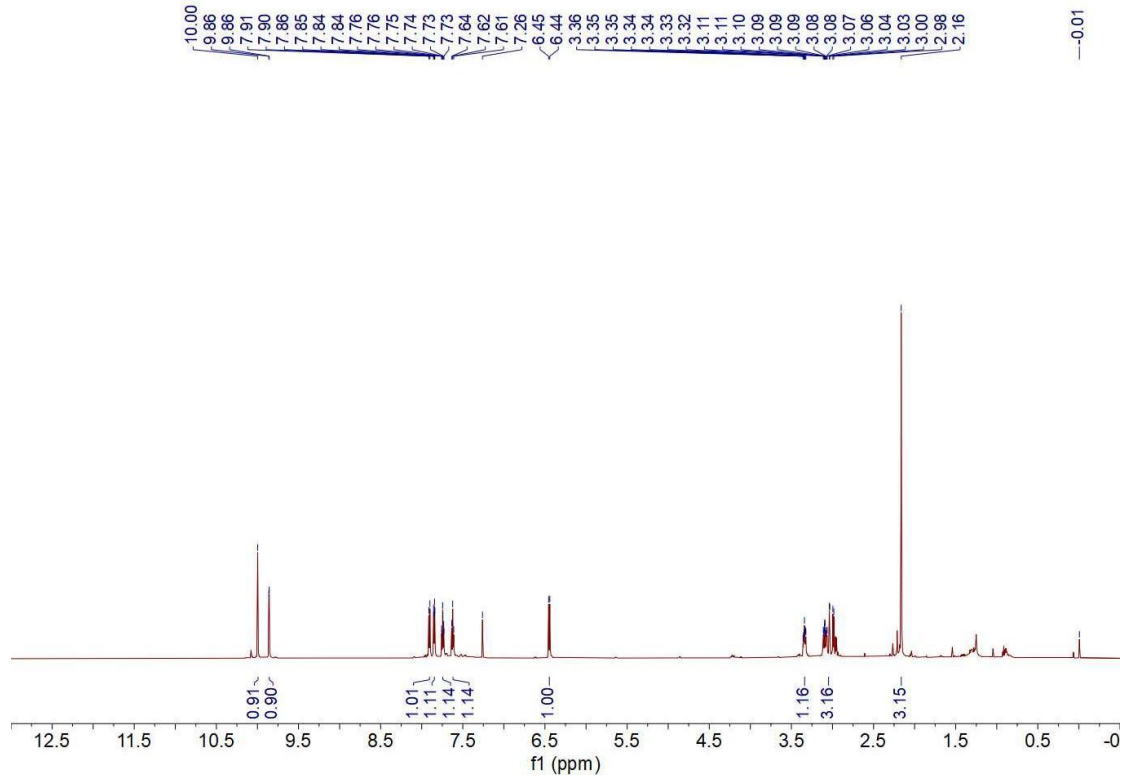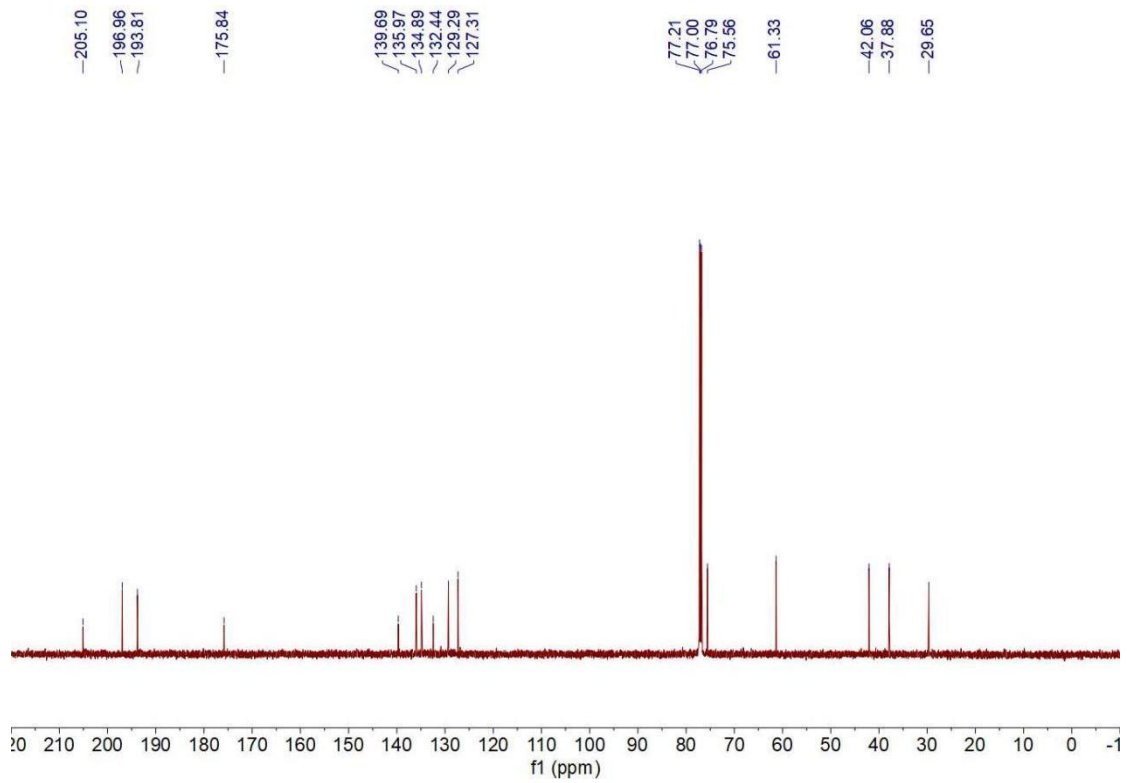

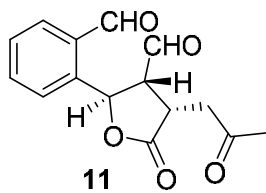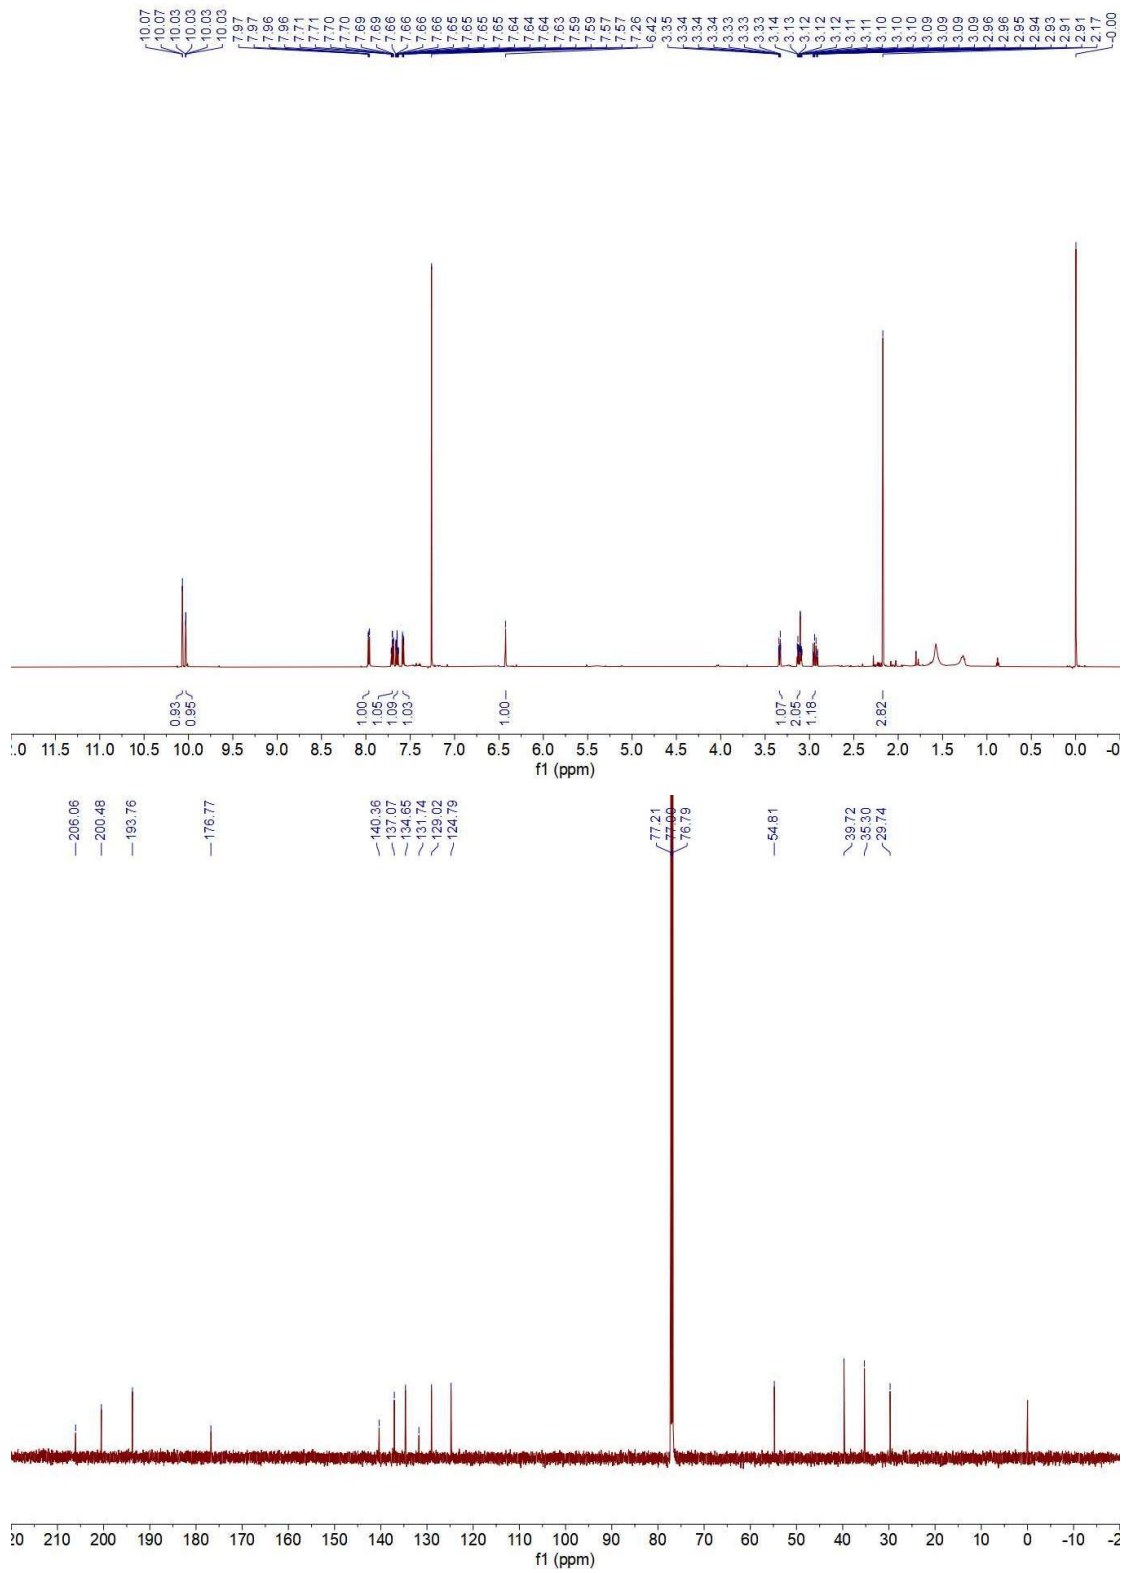

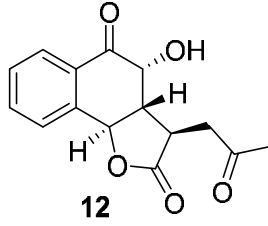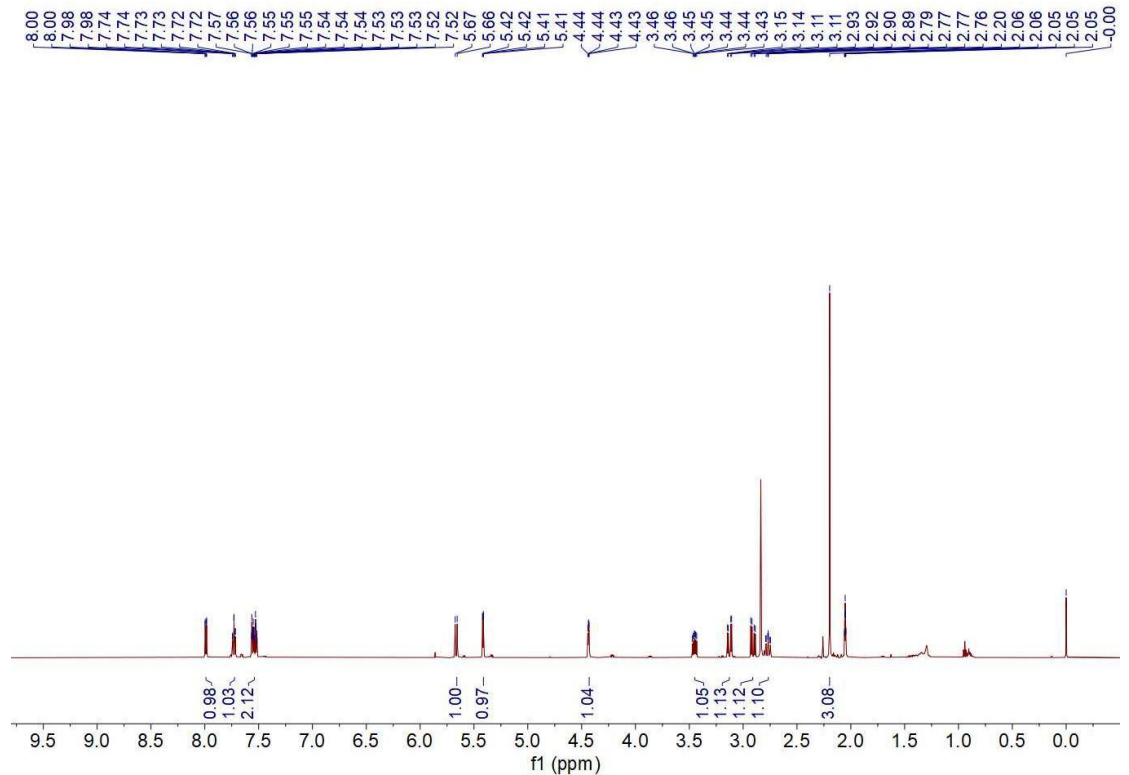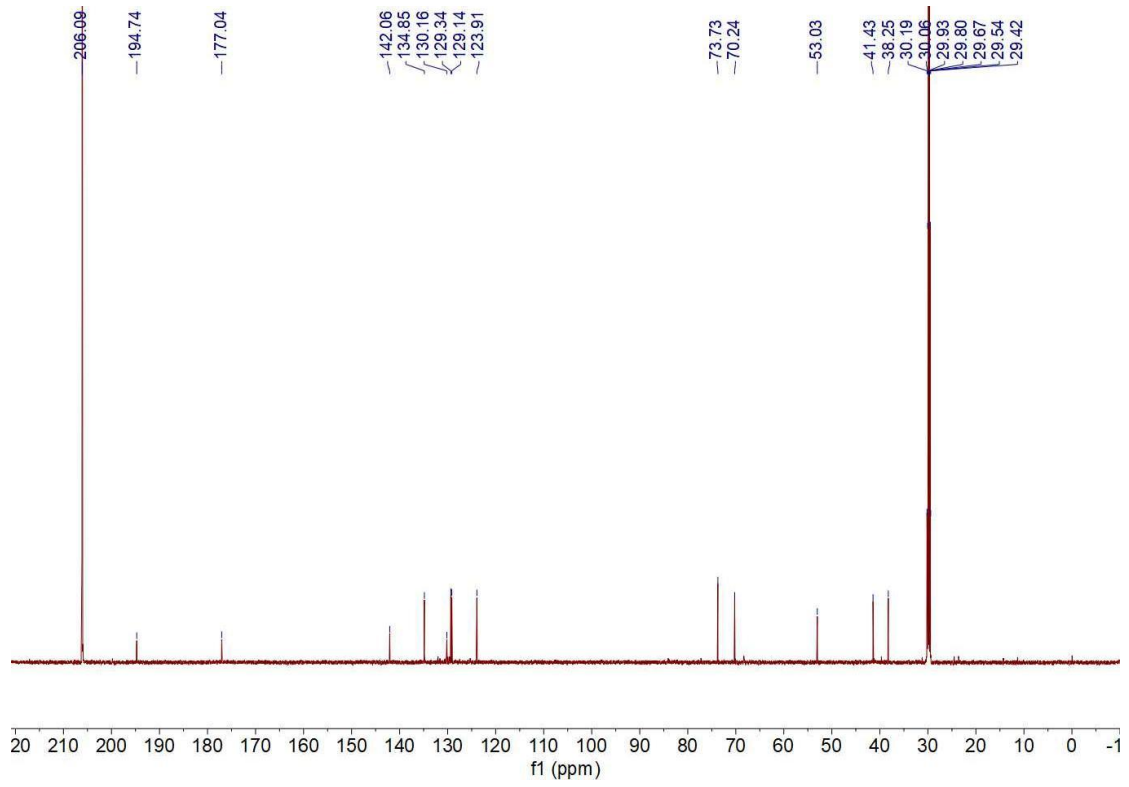

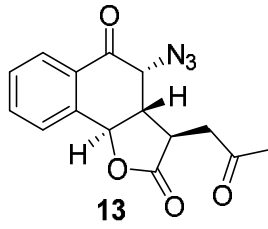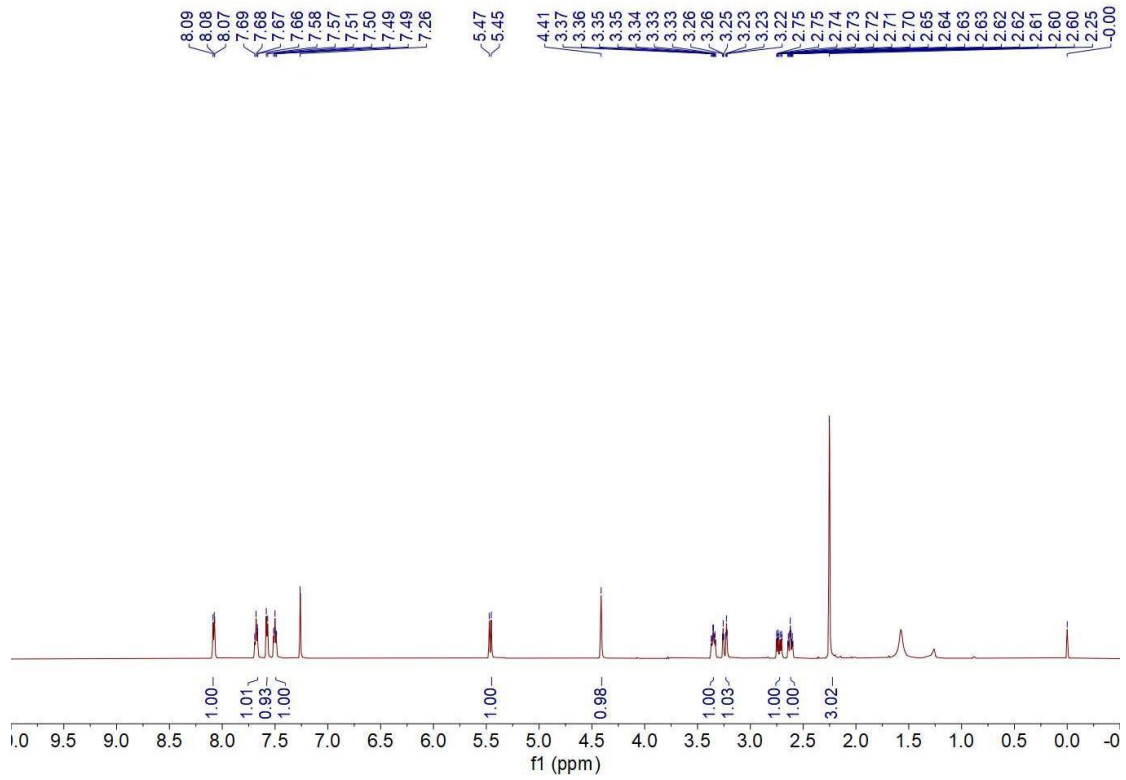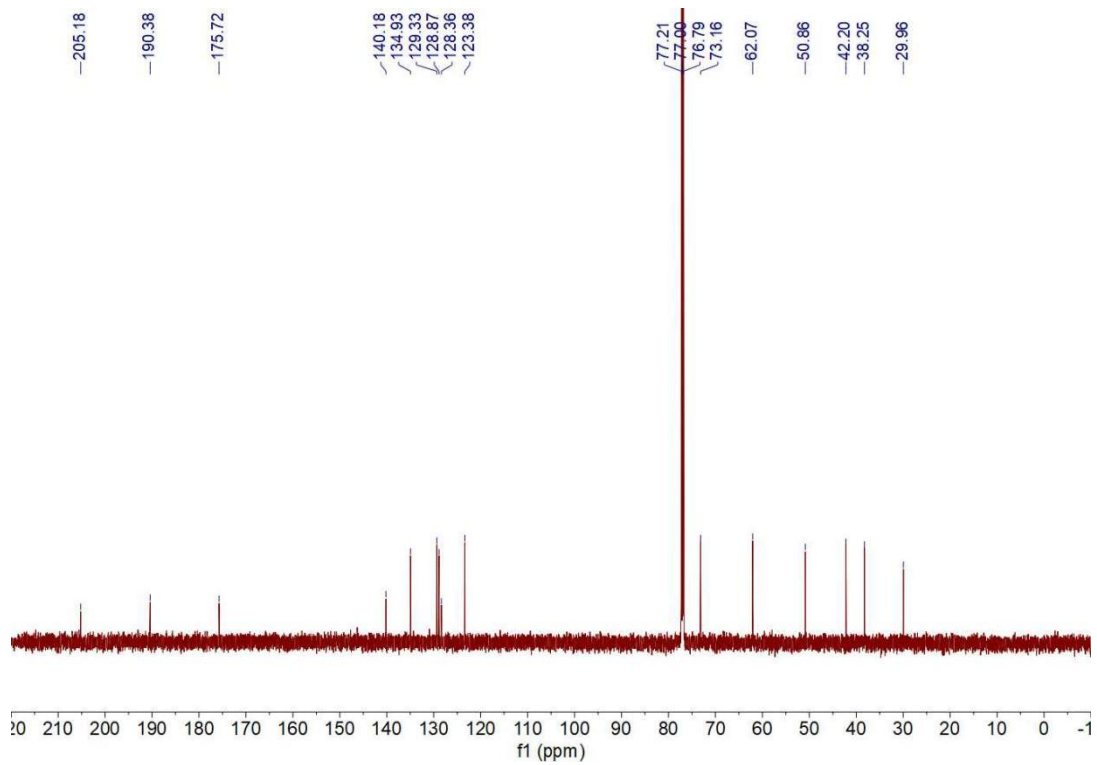

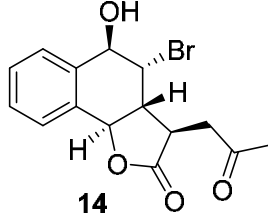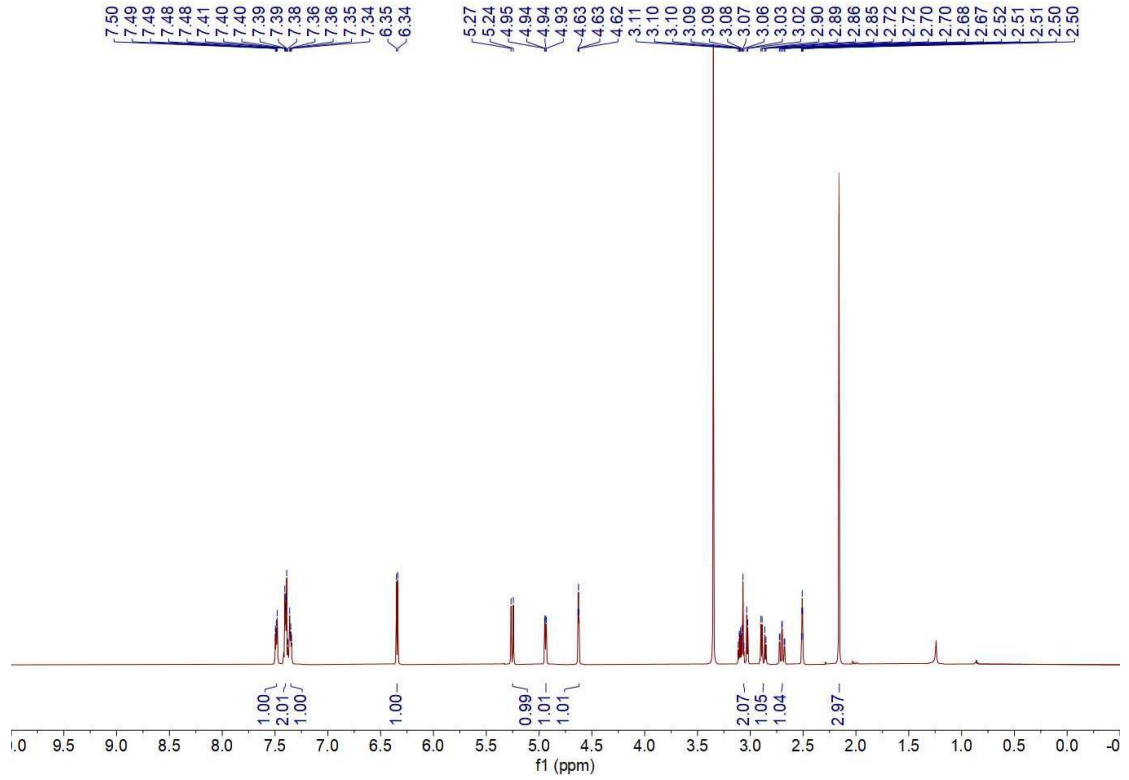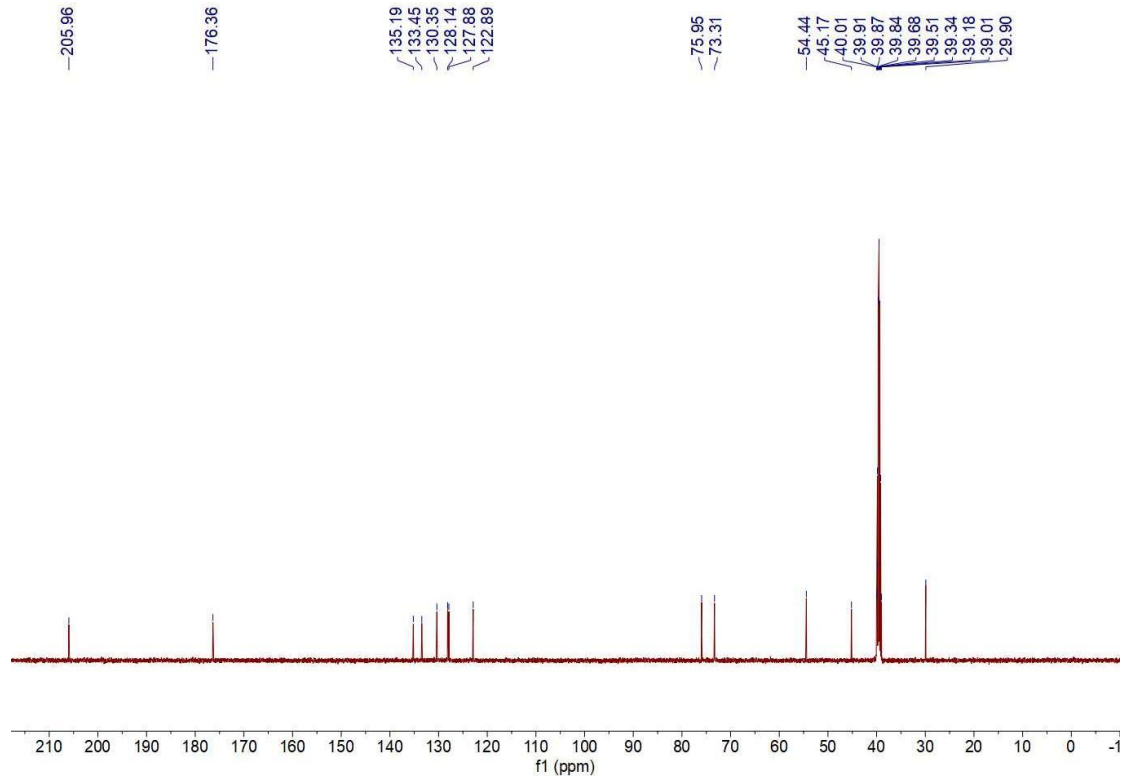

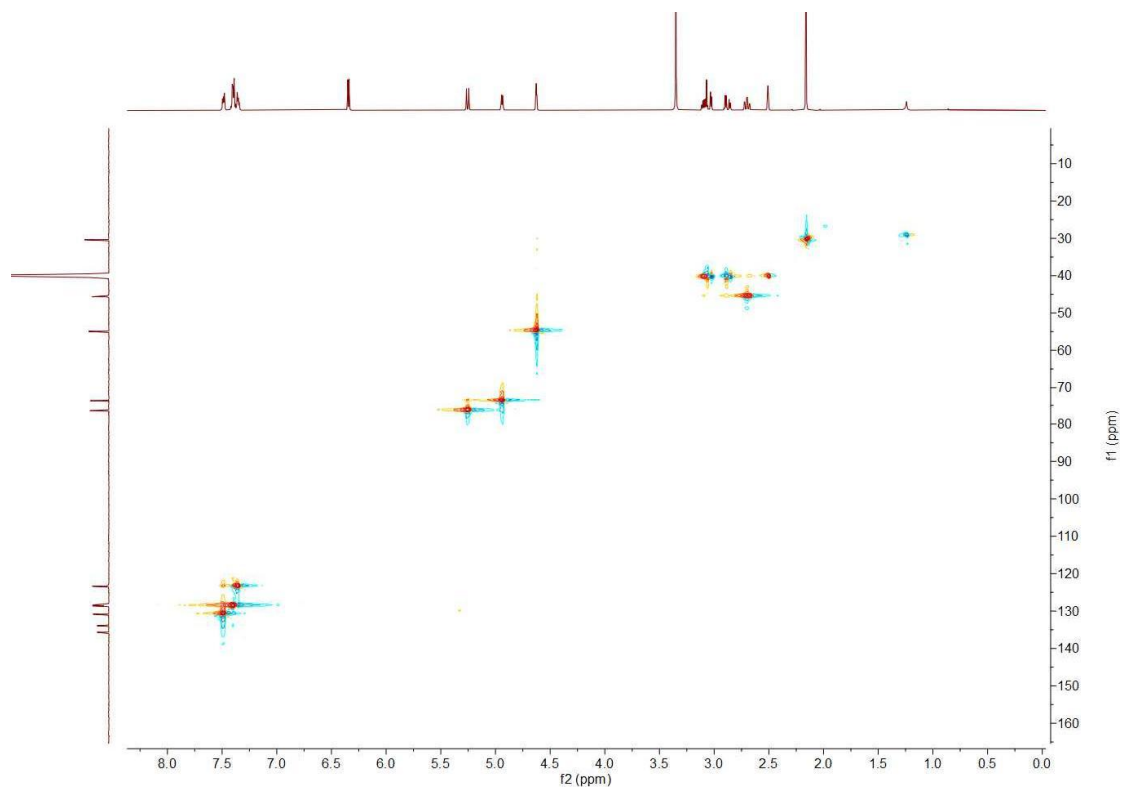

HSQC (500 MHz, DMSO-*d*6)

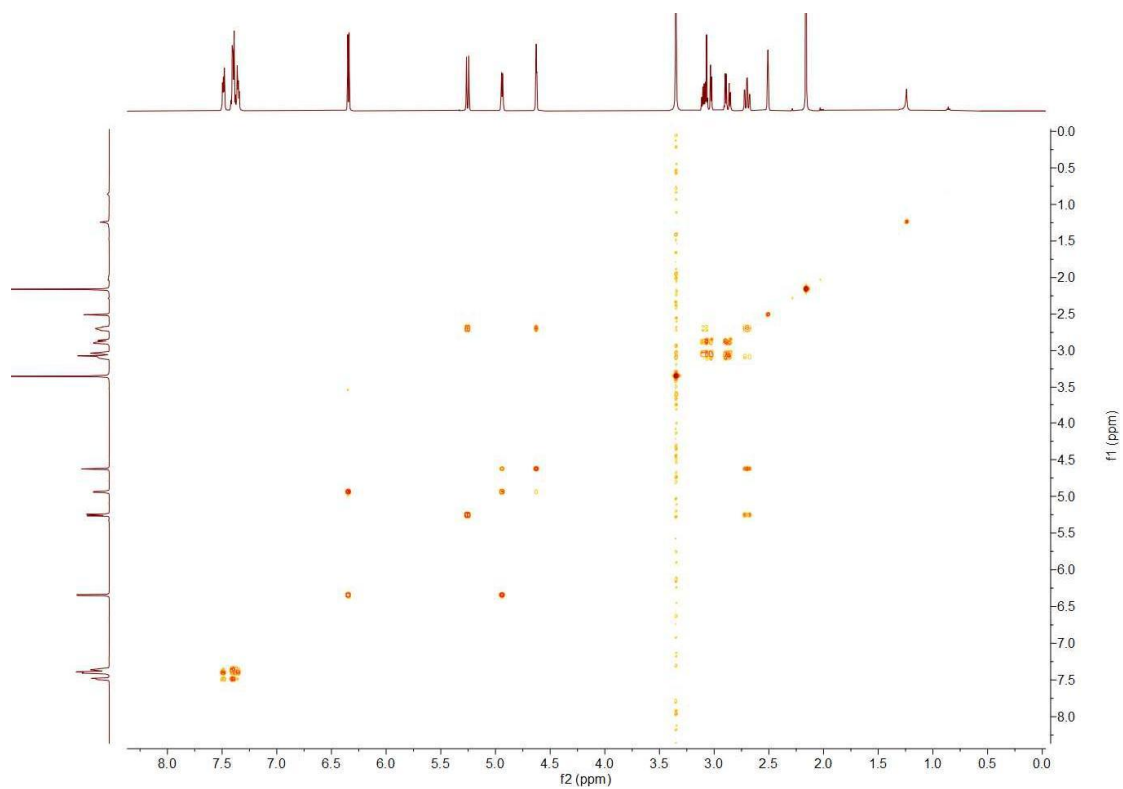

COSY (500 MHz, DMSO-*d*6)

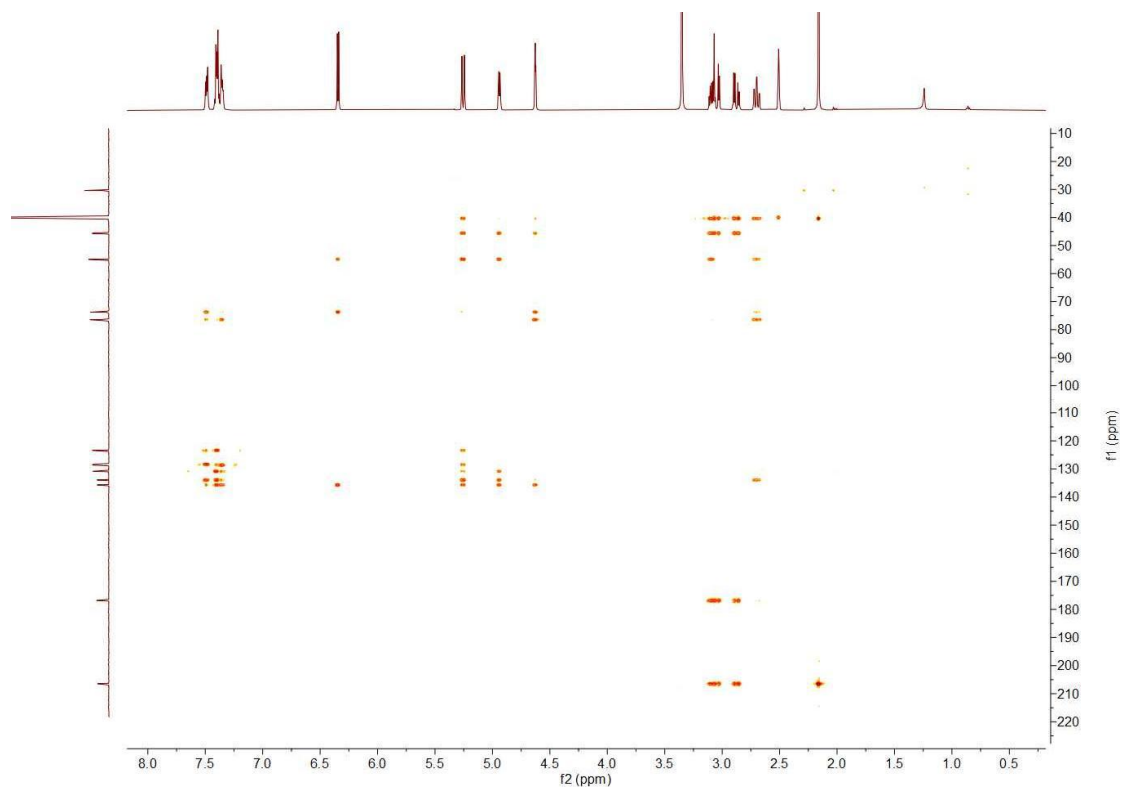

HMBC (500 MHz, DMSO-*d*<sub>6</sub>)

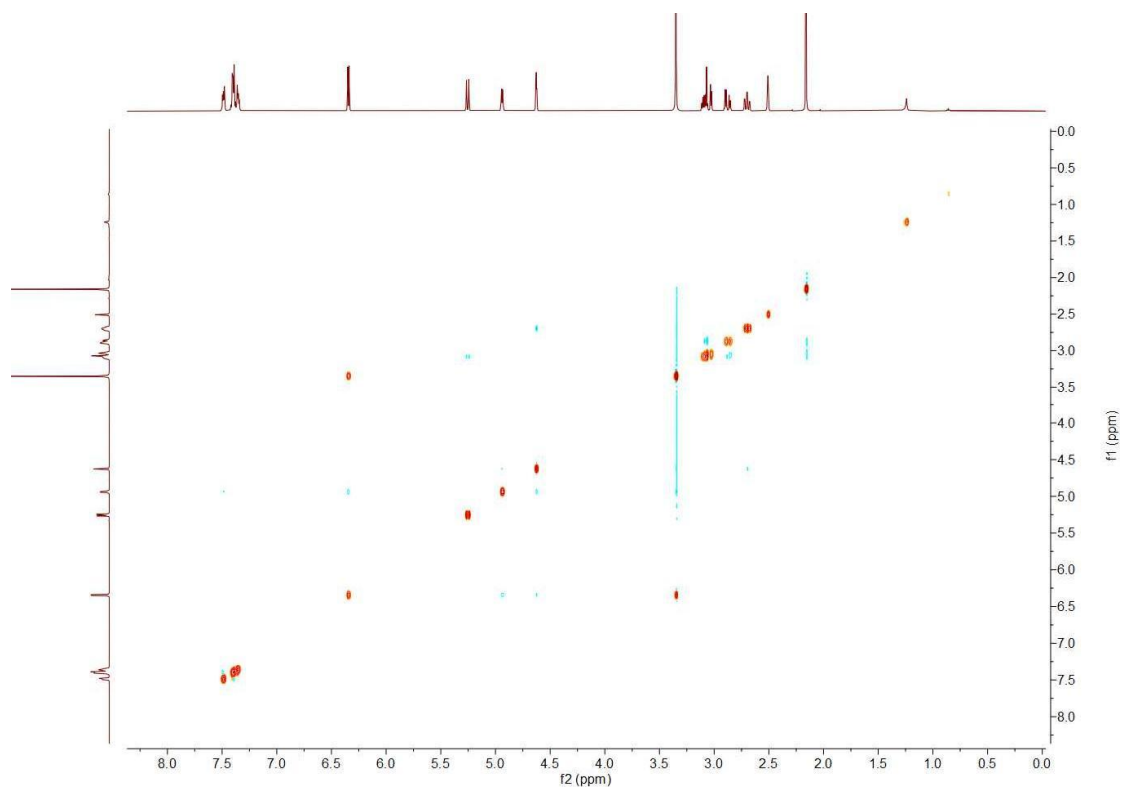

NOESY (500 MHz, DMSO-*d*<sub>6</sub>)

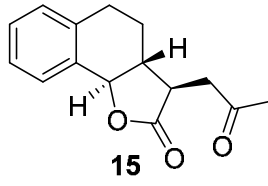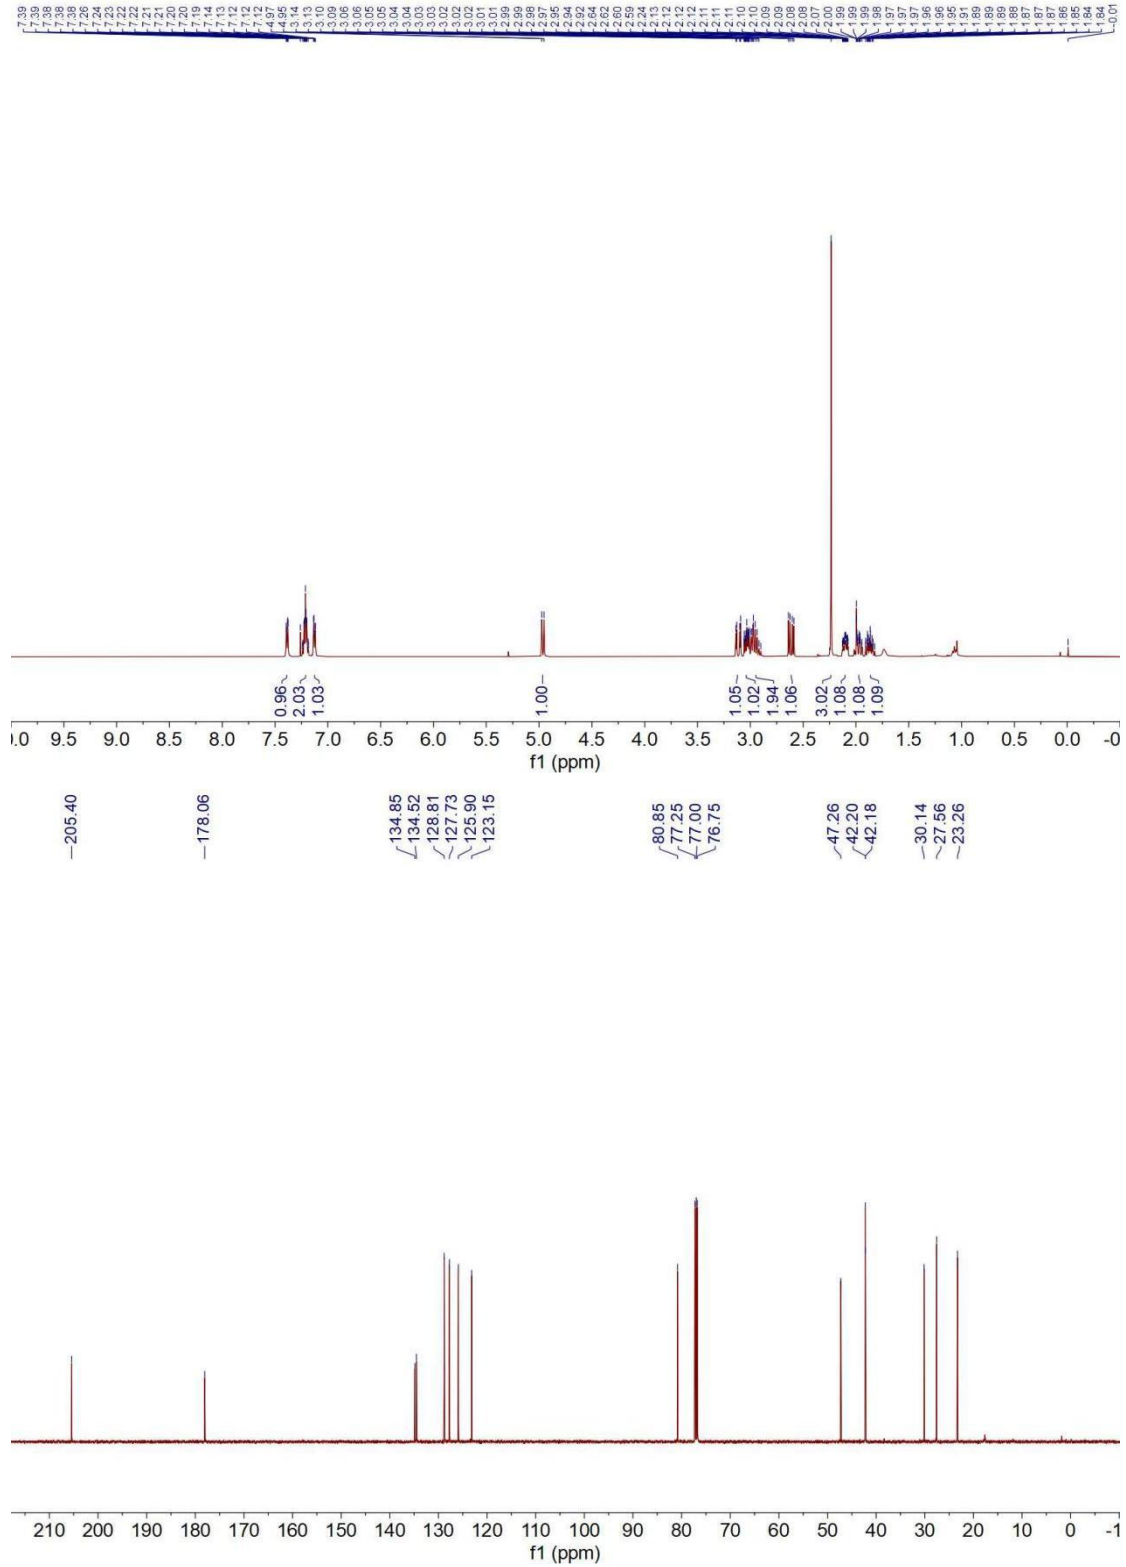

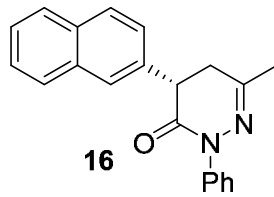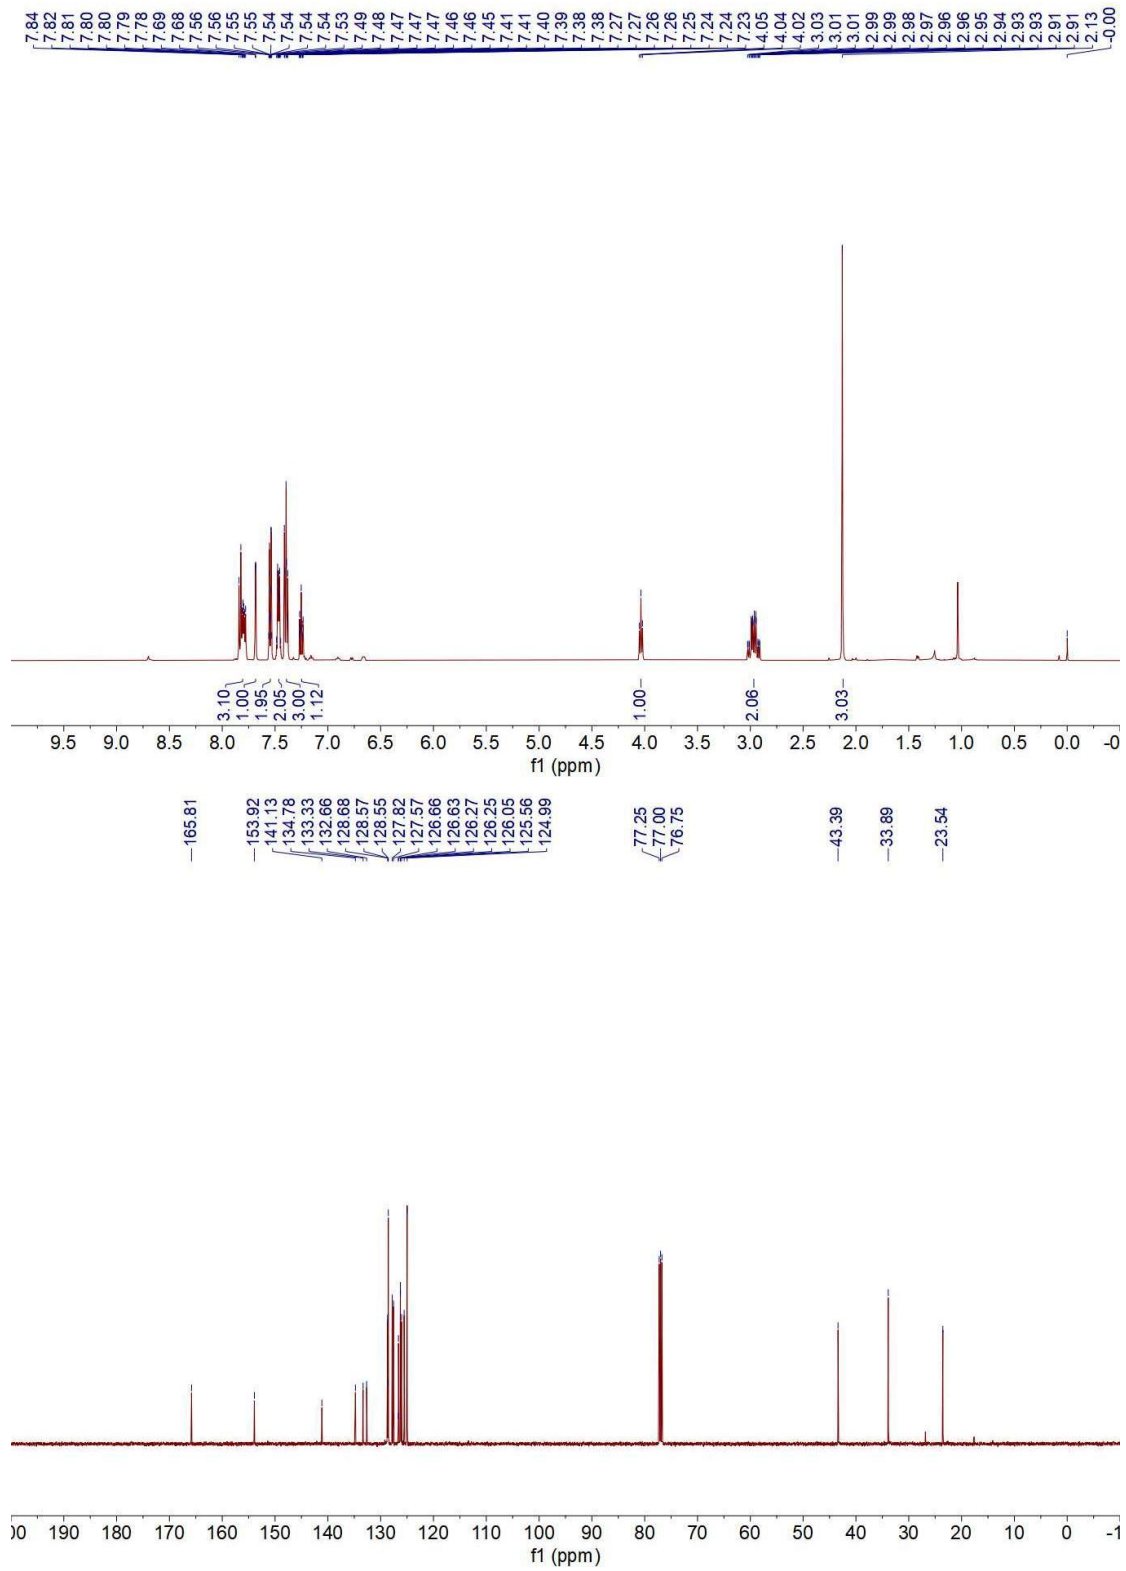

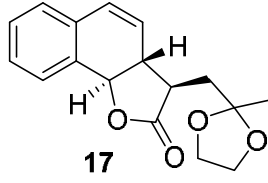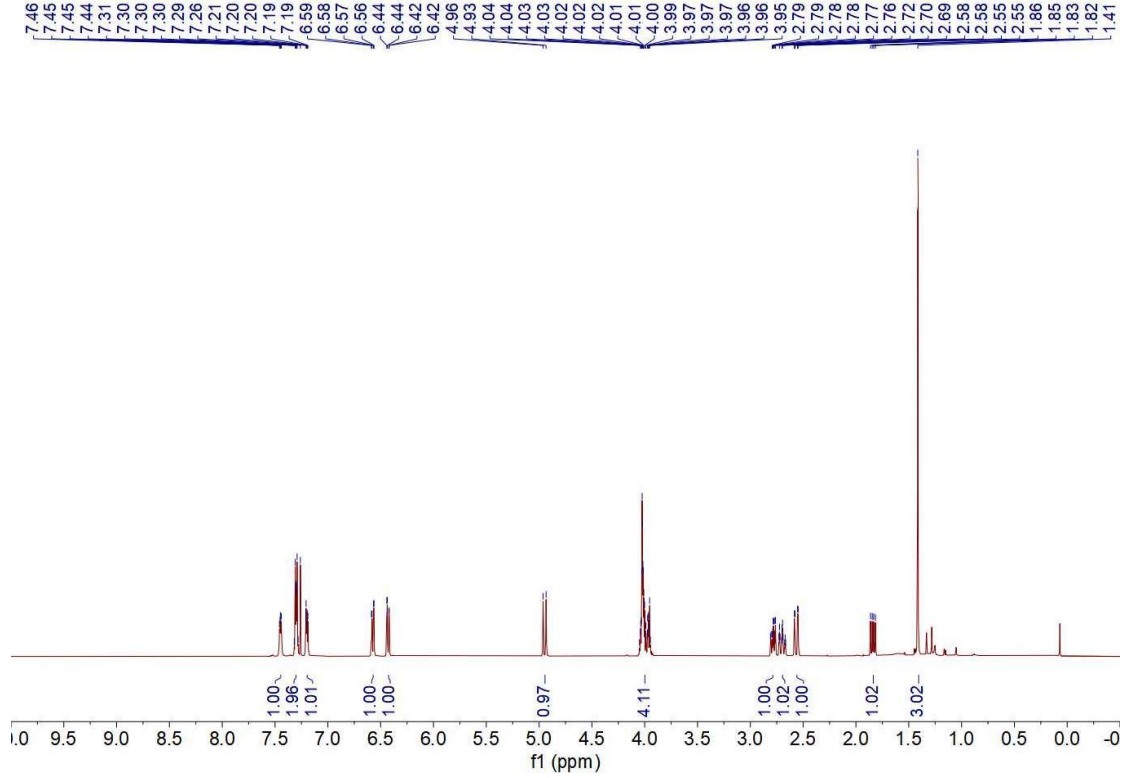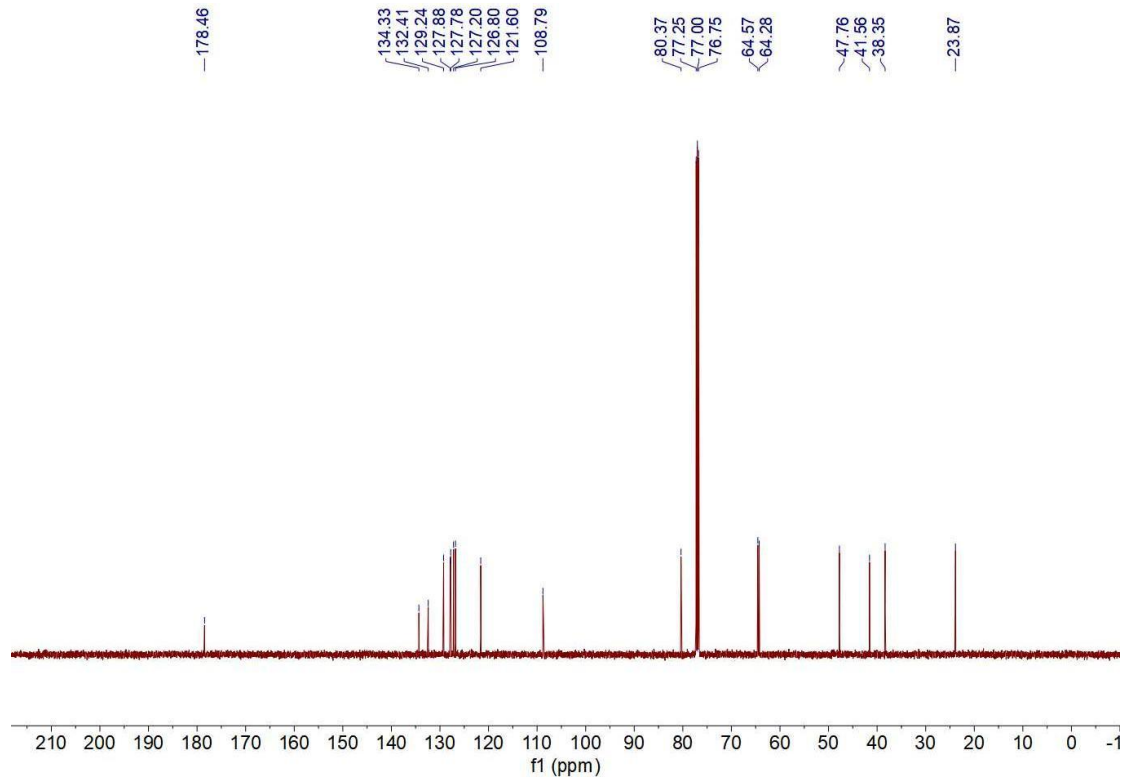

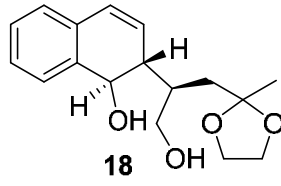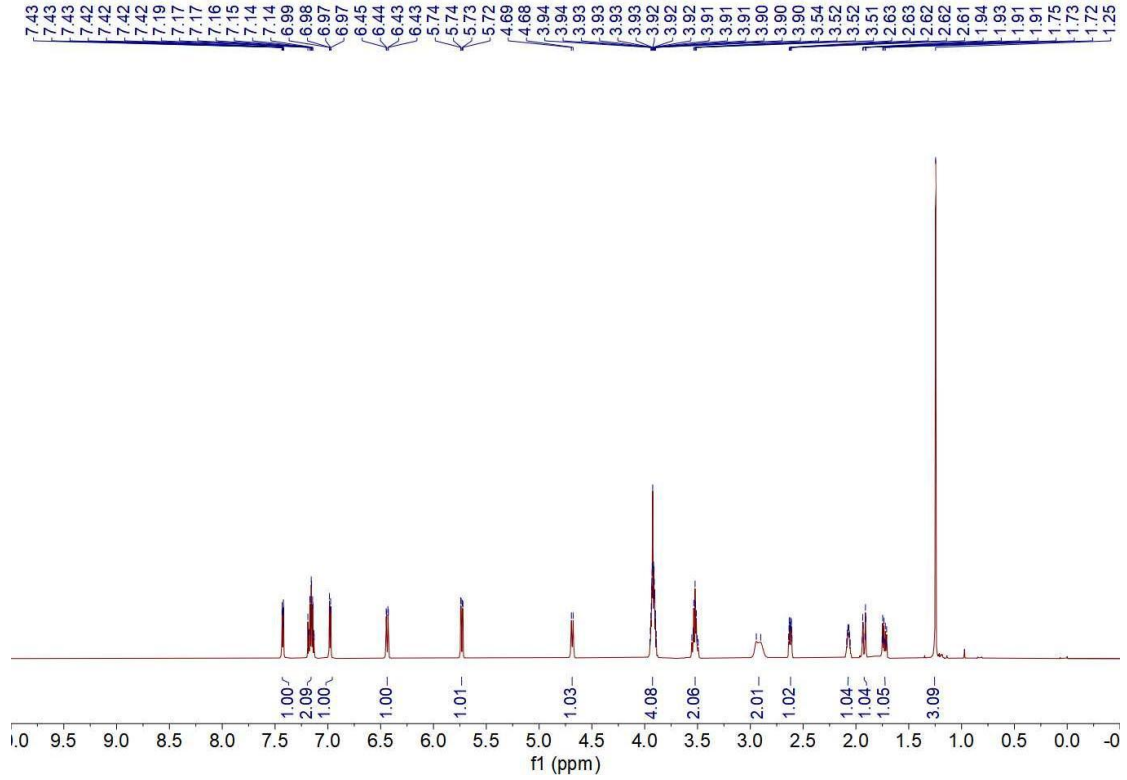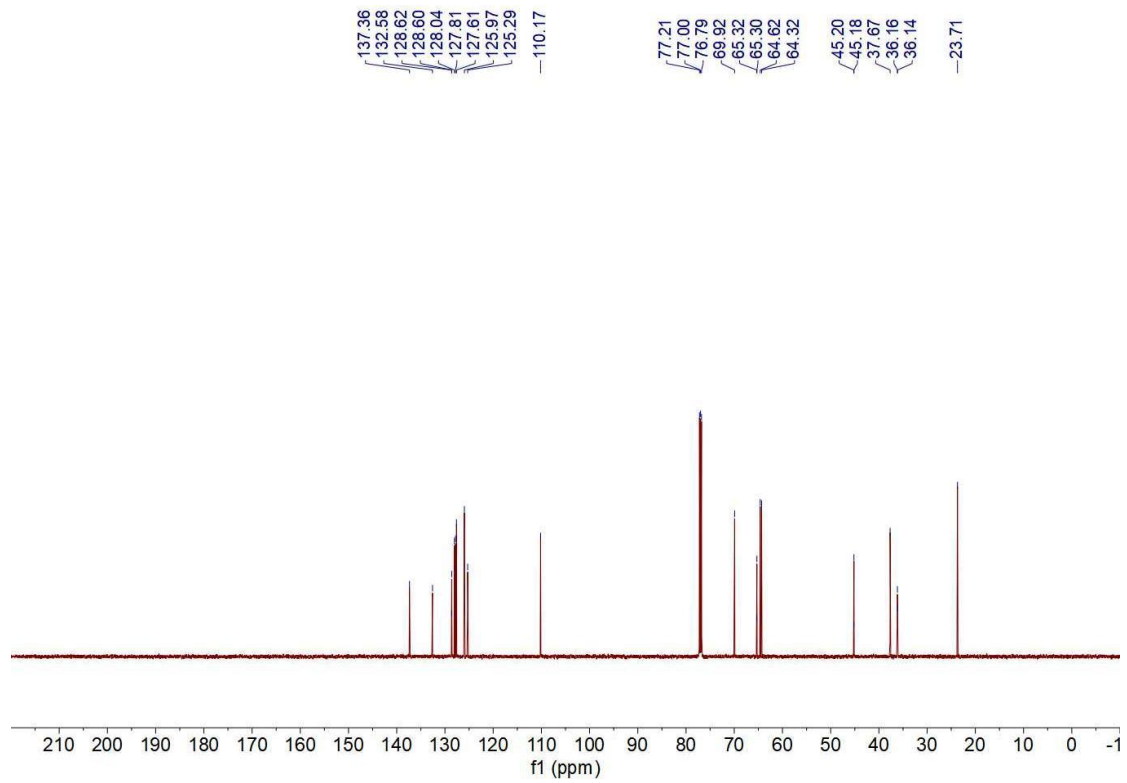

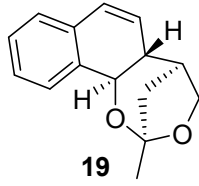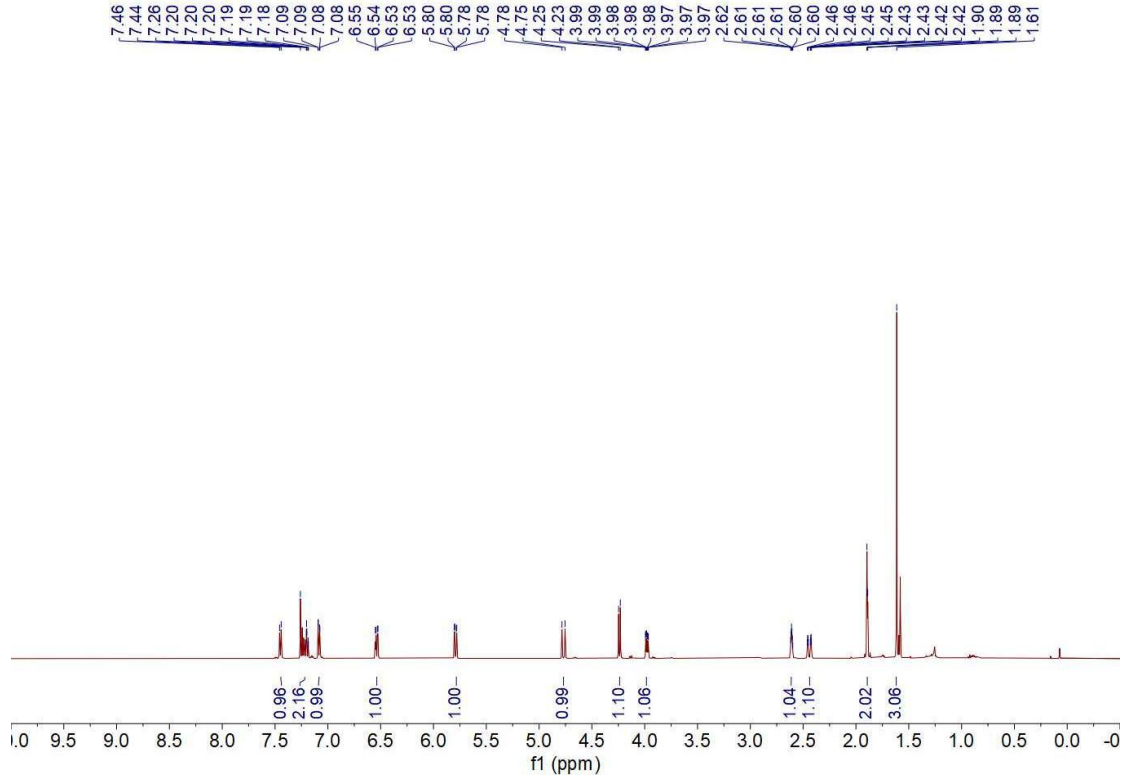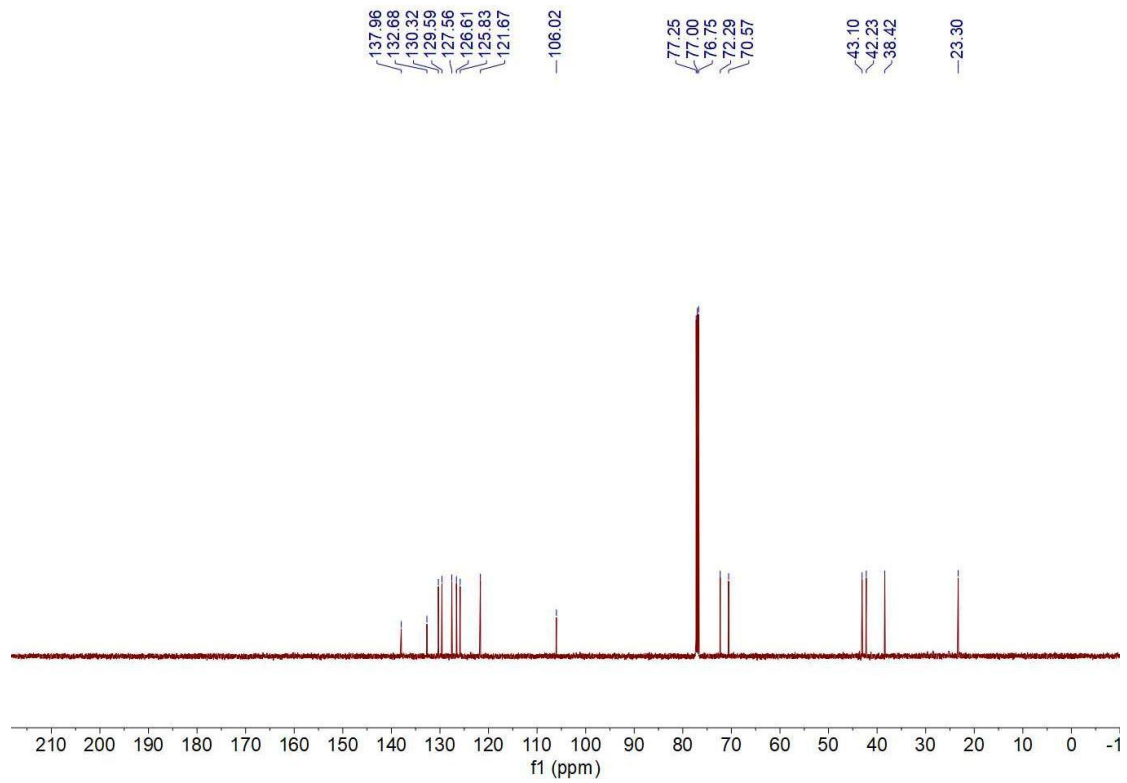

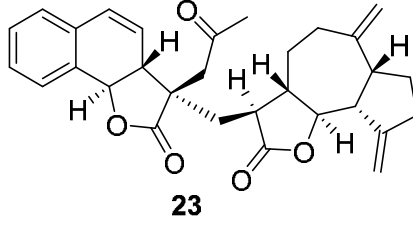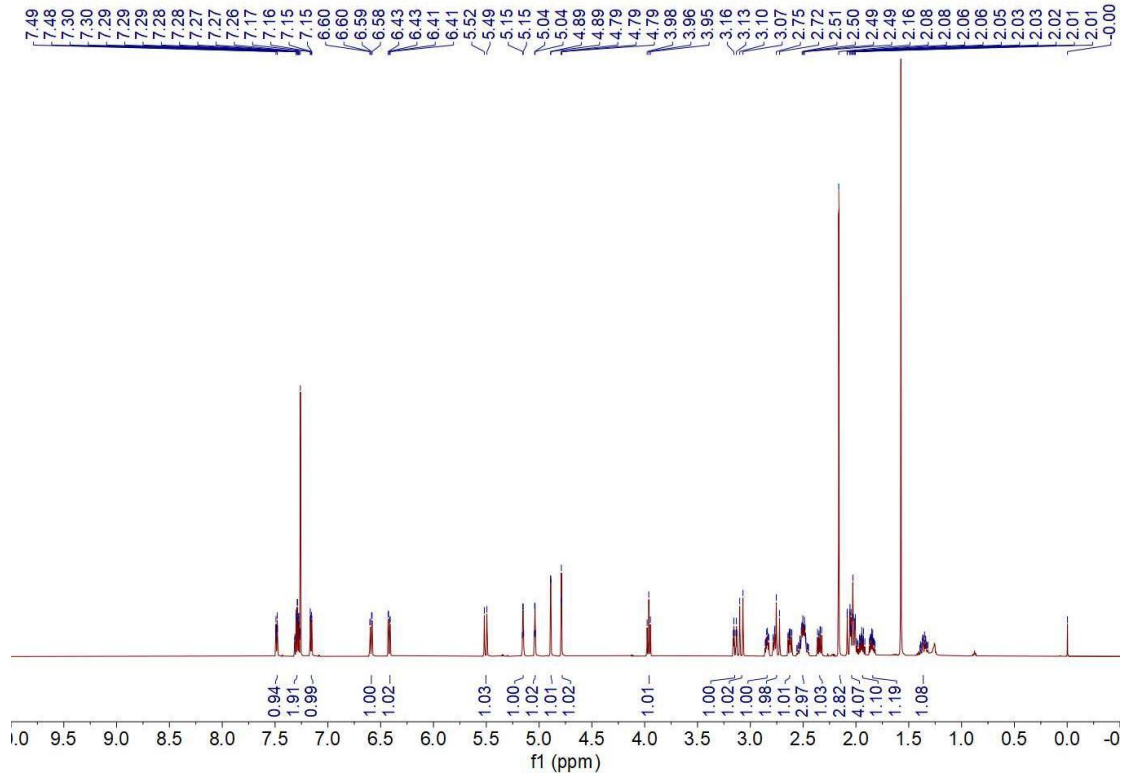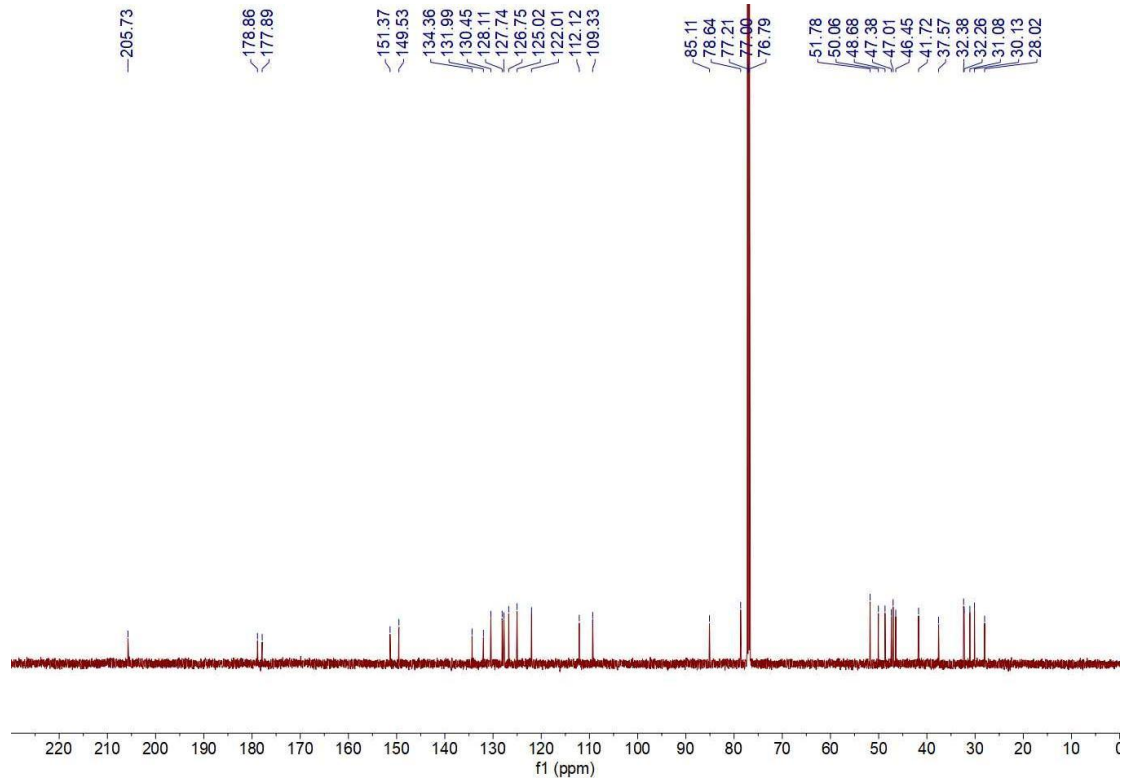

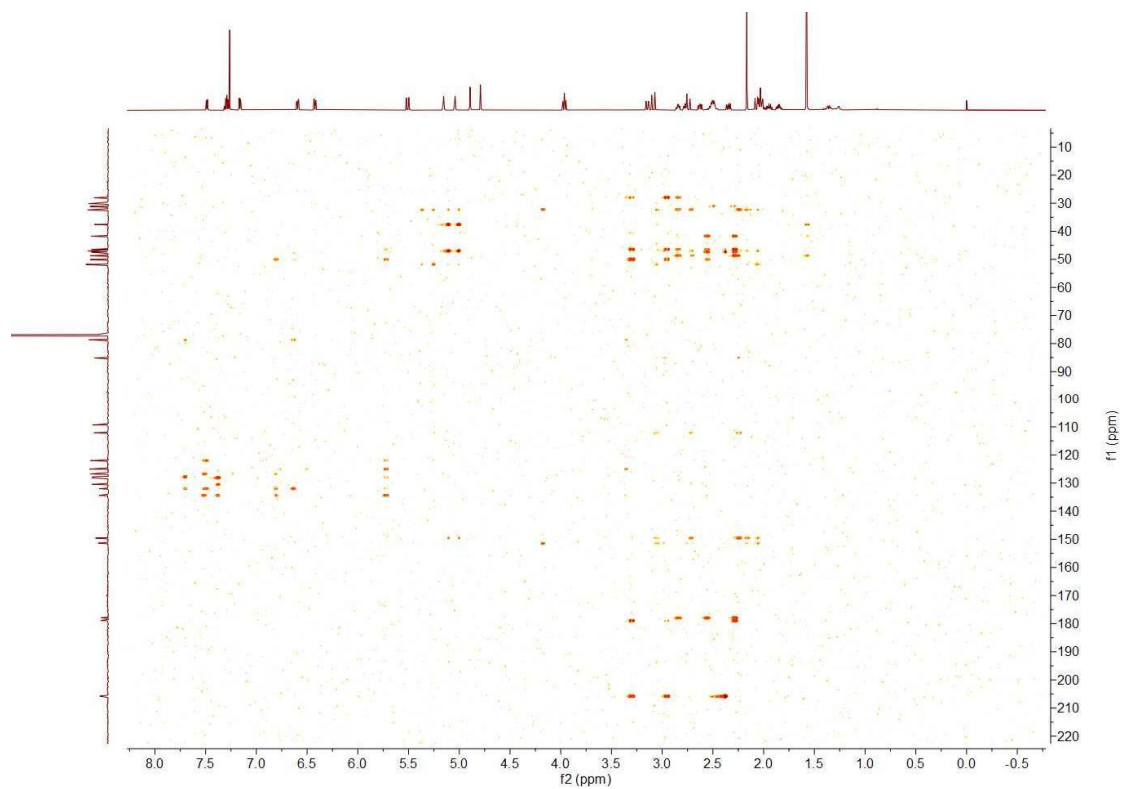

HSQC (600 MHz, CDCl<sub>3</sub>)

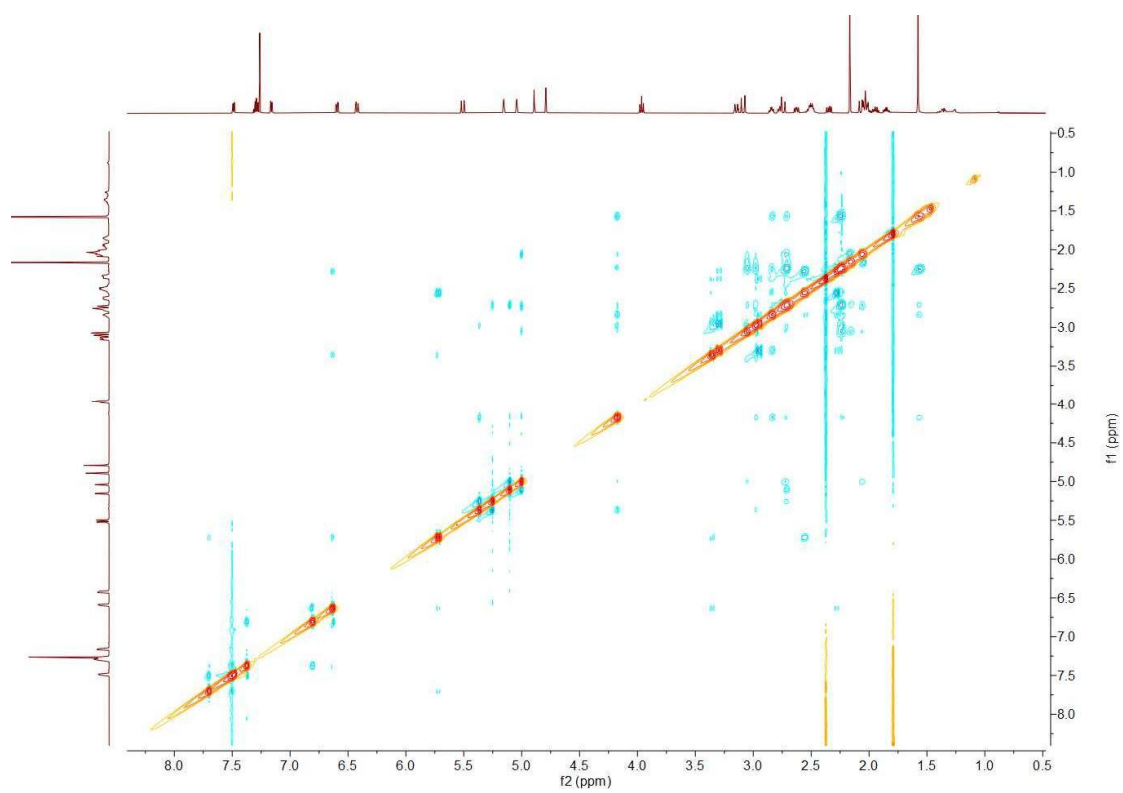

Cosy (600 MHz, CDCl<sub>3</sub>)

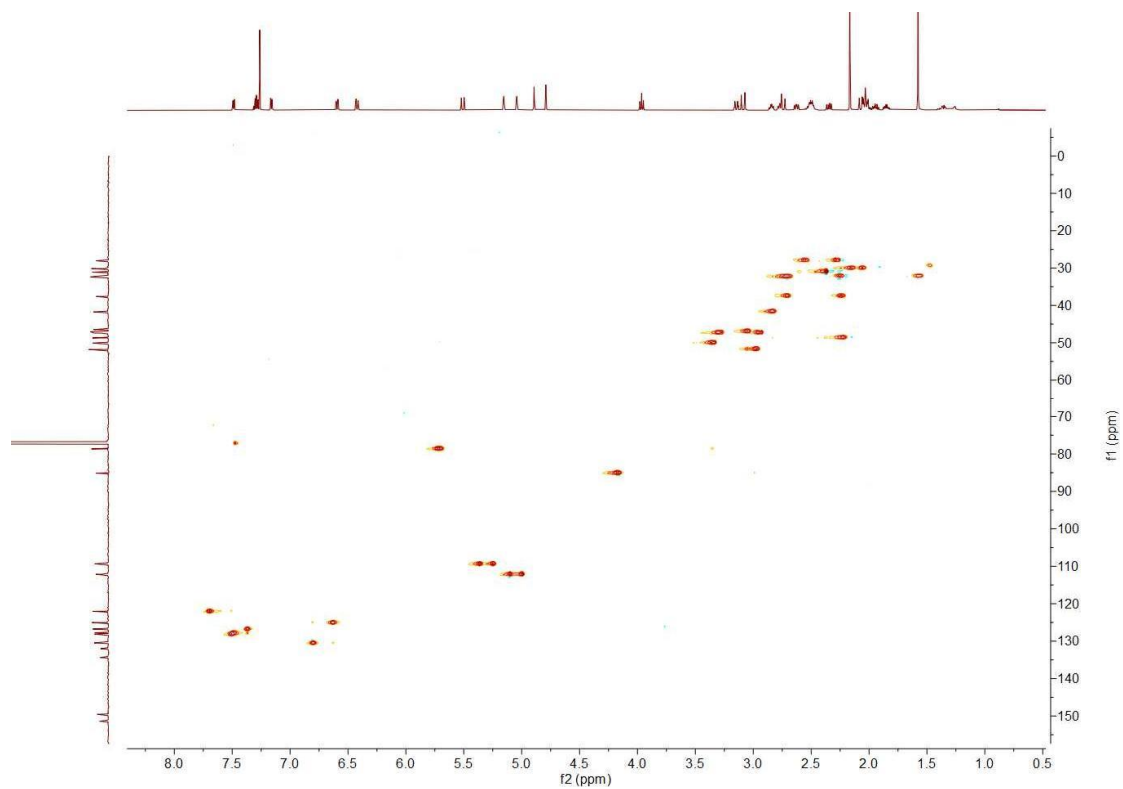

HMBC (600 MHz, CDCl<sub>3</sub>)

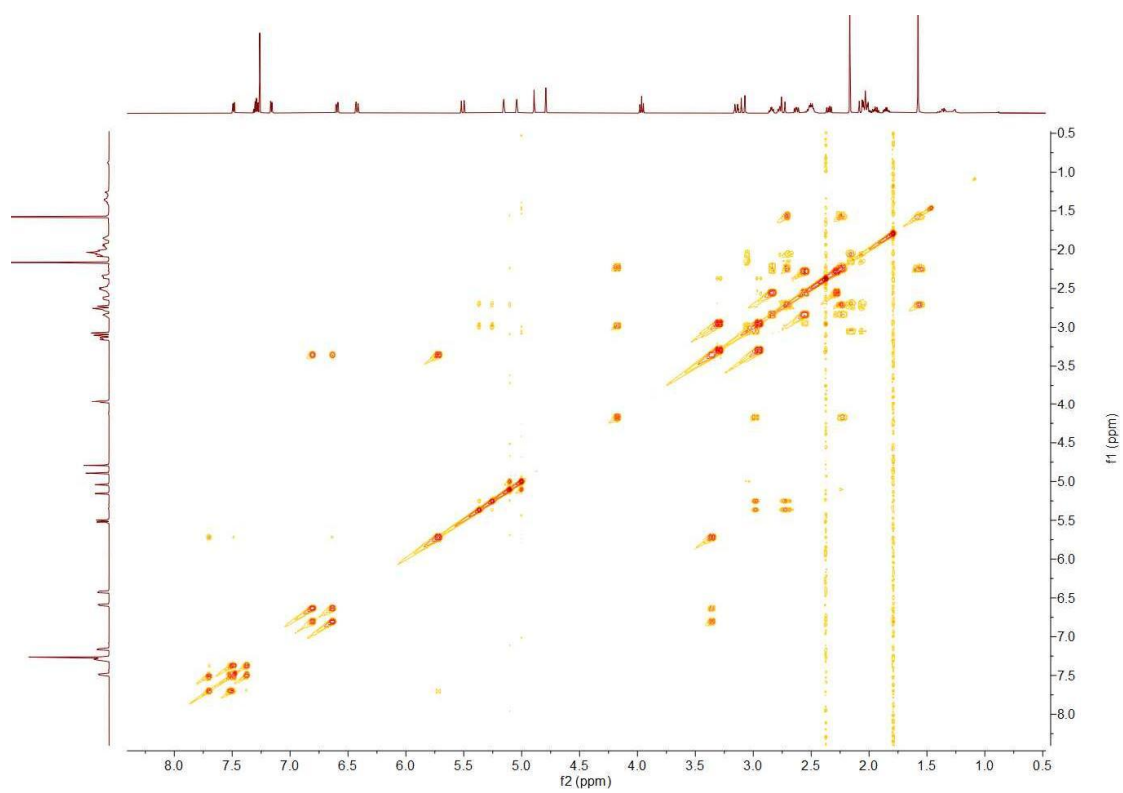

Noesy (600 MHz, CDCl<sub>3</sub>)

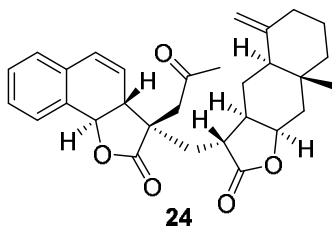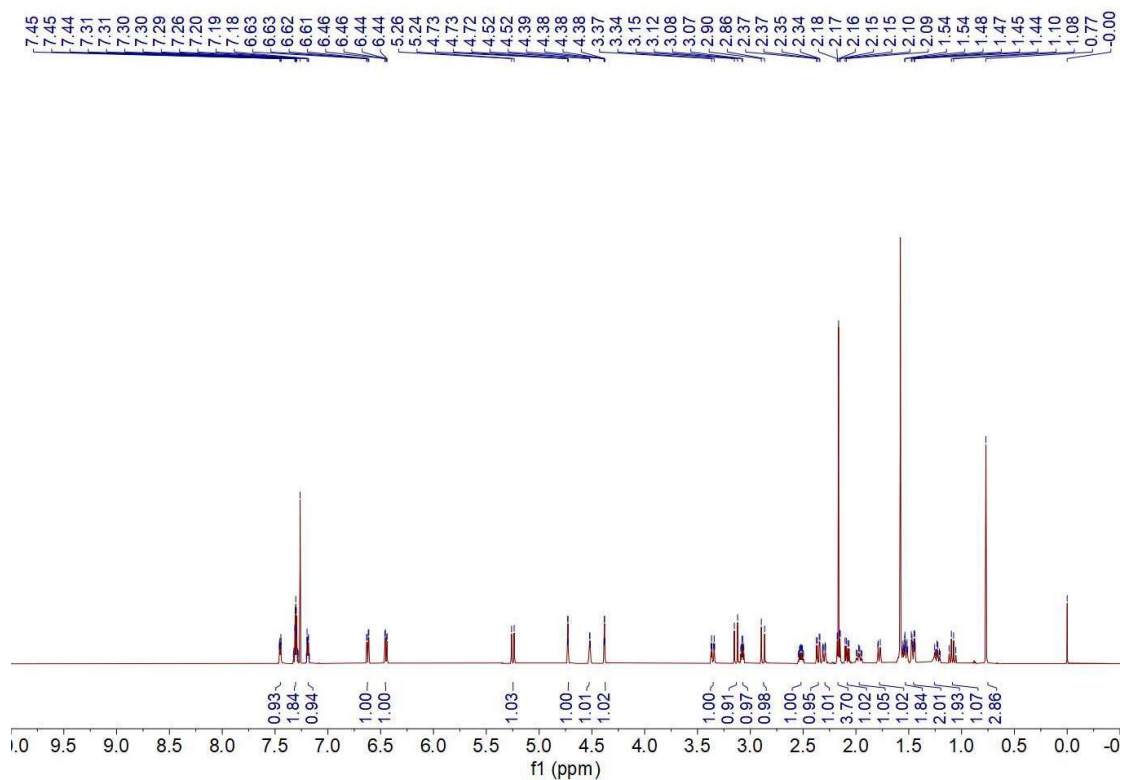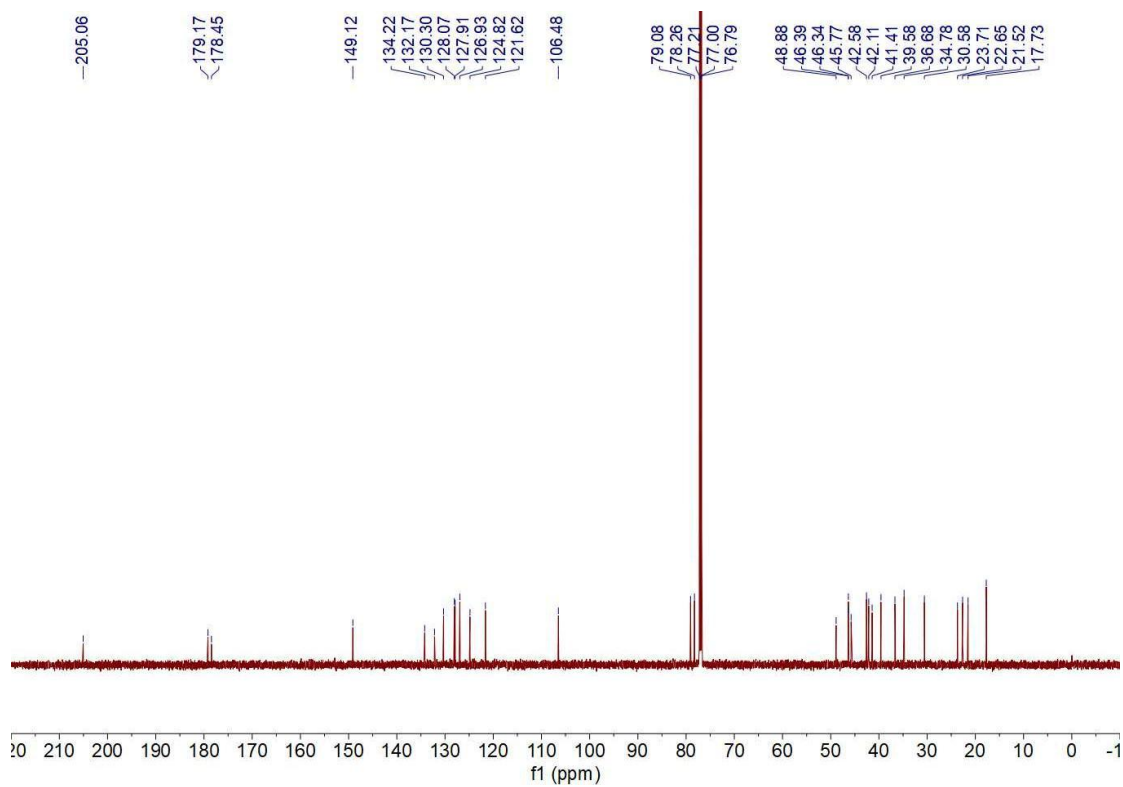

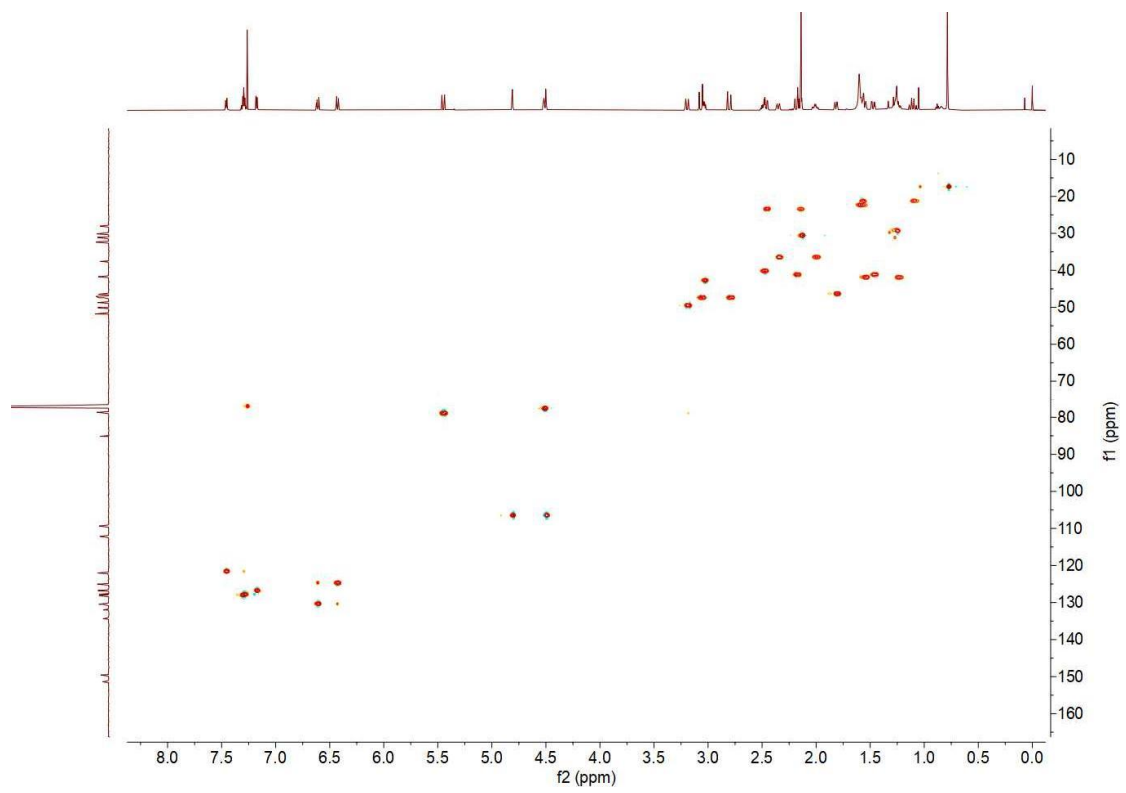

HSQC (600 MHz, CDCl<sub>3</sub>)

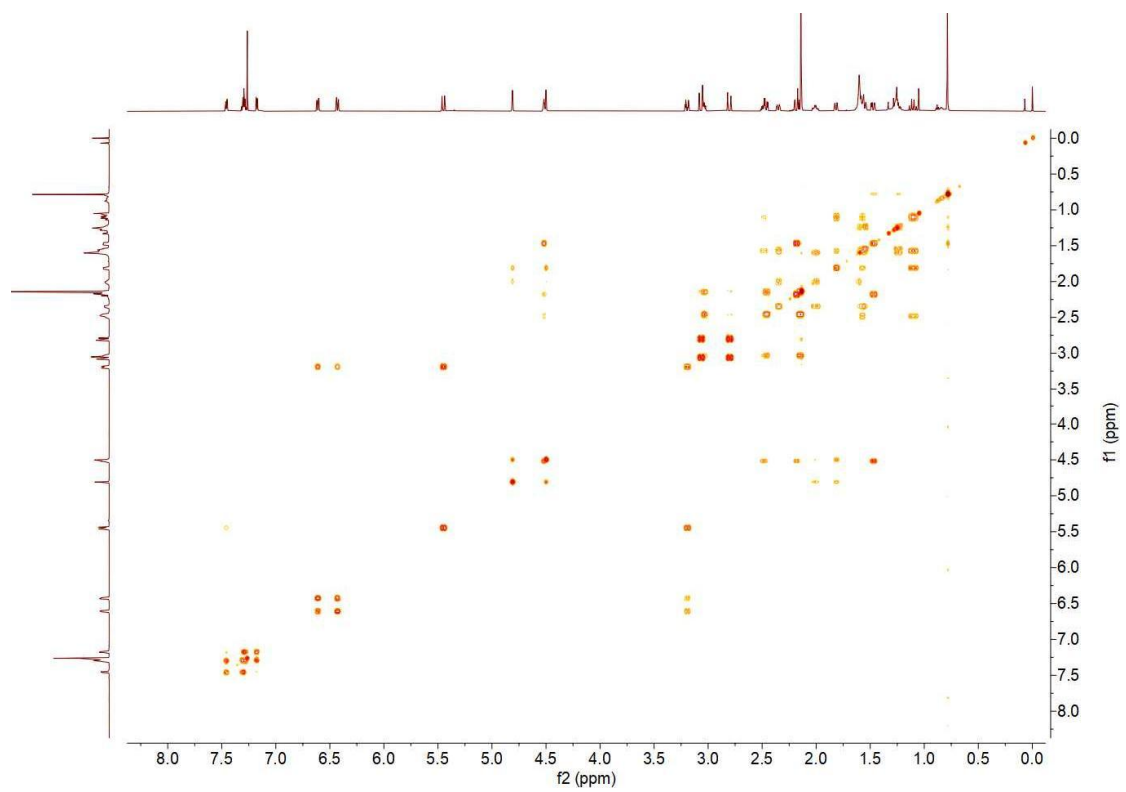

Cosy (600 MHz, CDCl<sub>3</sub>)

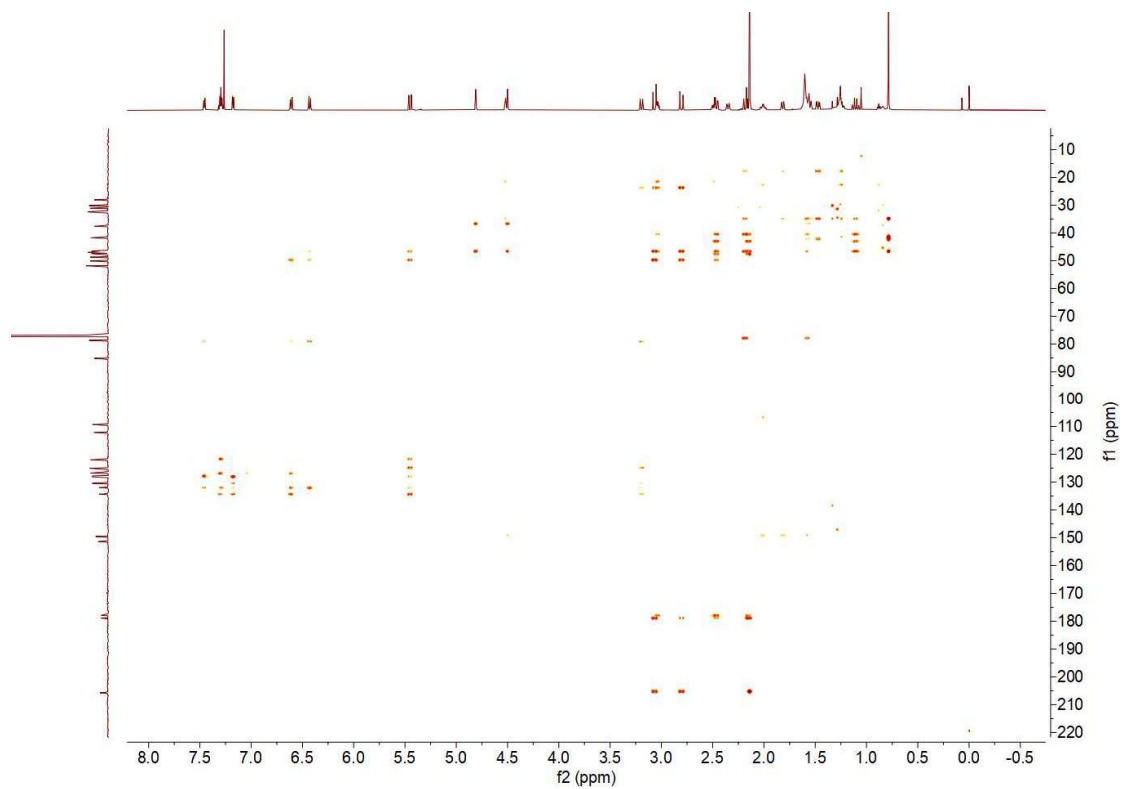

HMBC (600 MHz, CDCl<sub>3</sub>)

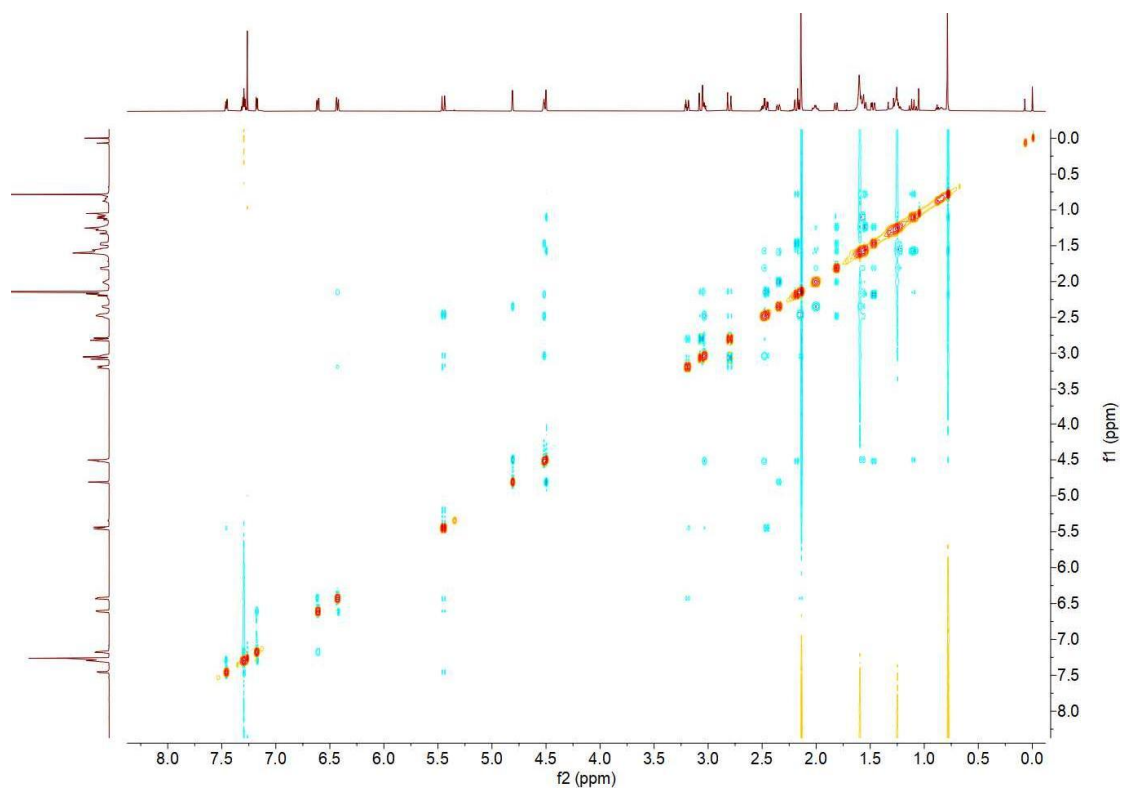

Noesy (600 MHz, CDCl<sub>3</sub>)

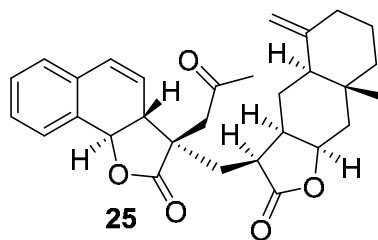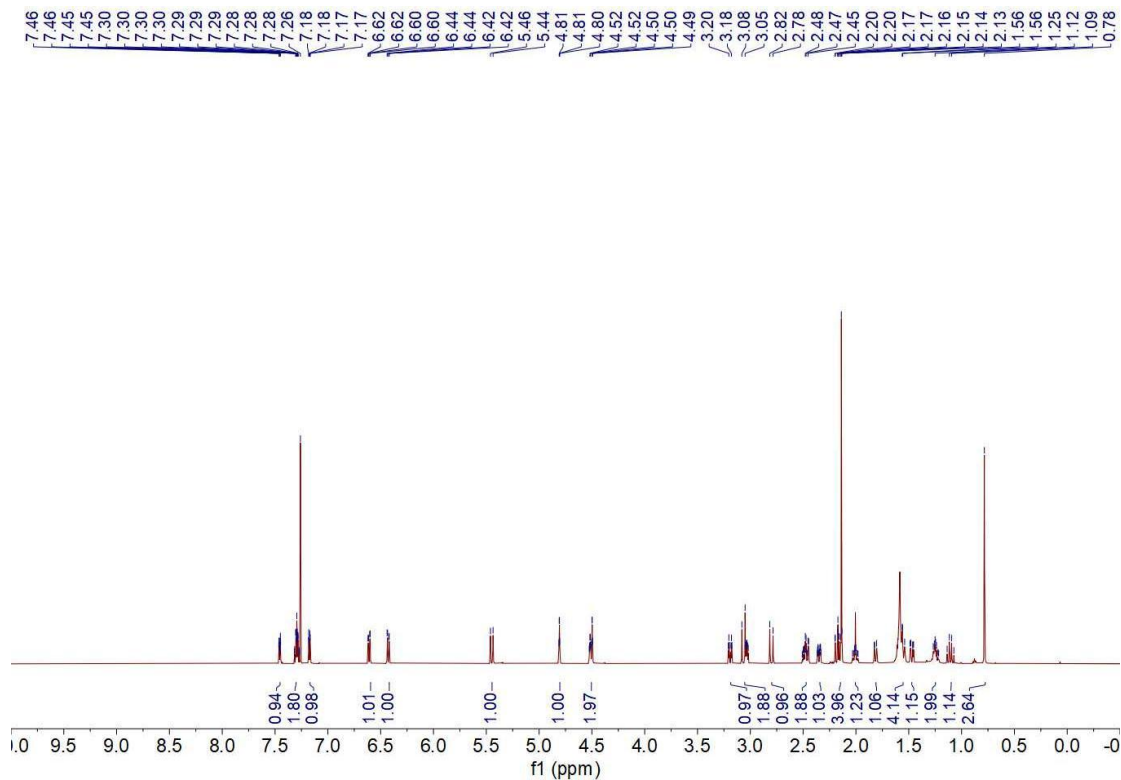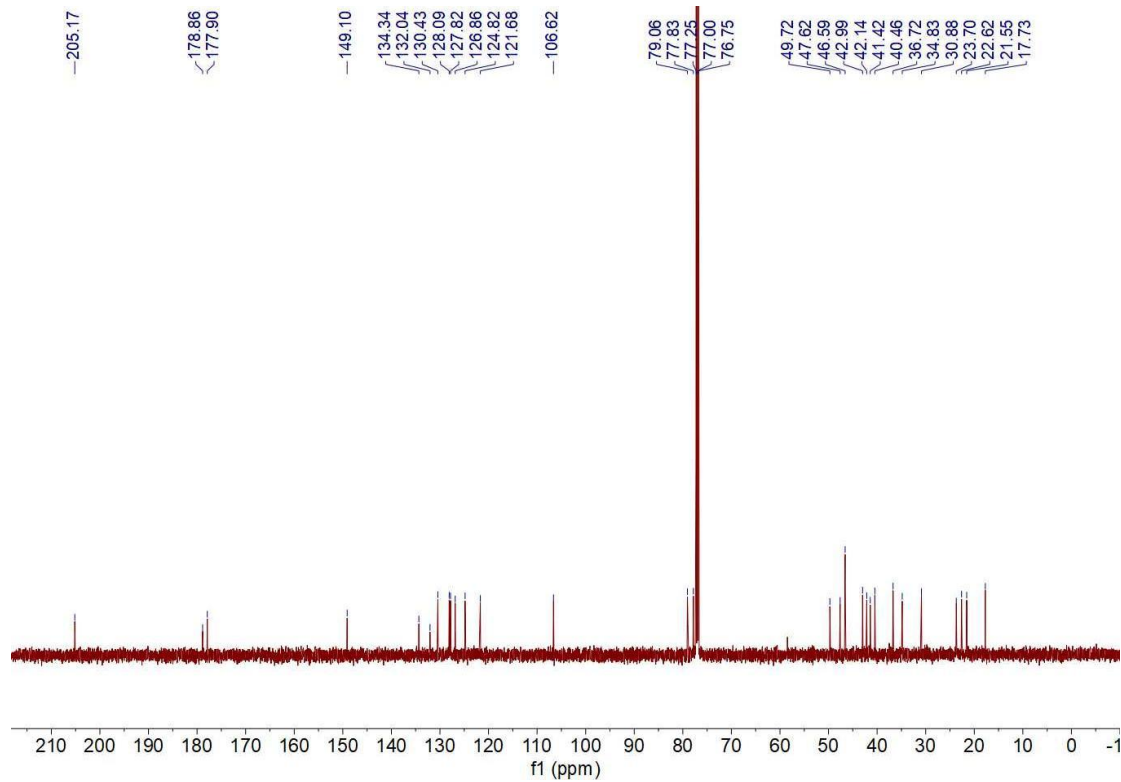

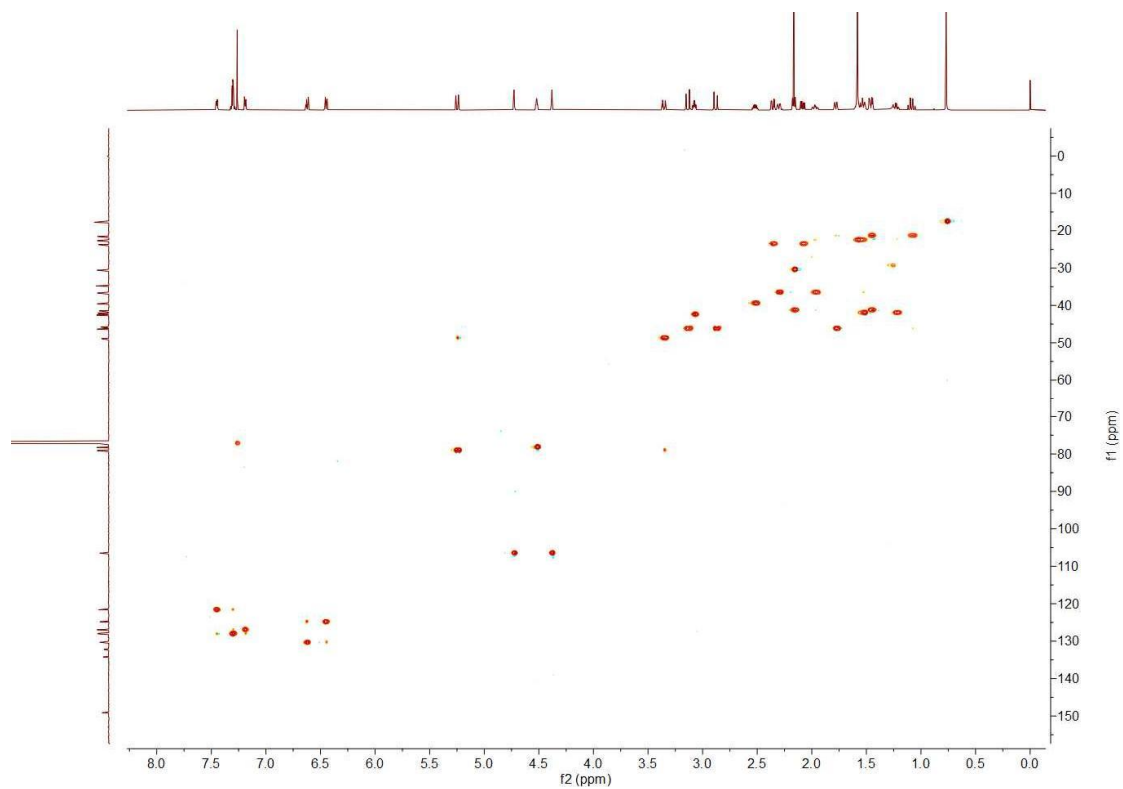

HSQC (600 MHz, CDCl<sub>3</sub>)

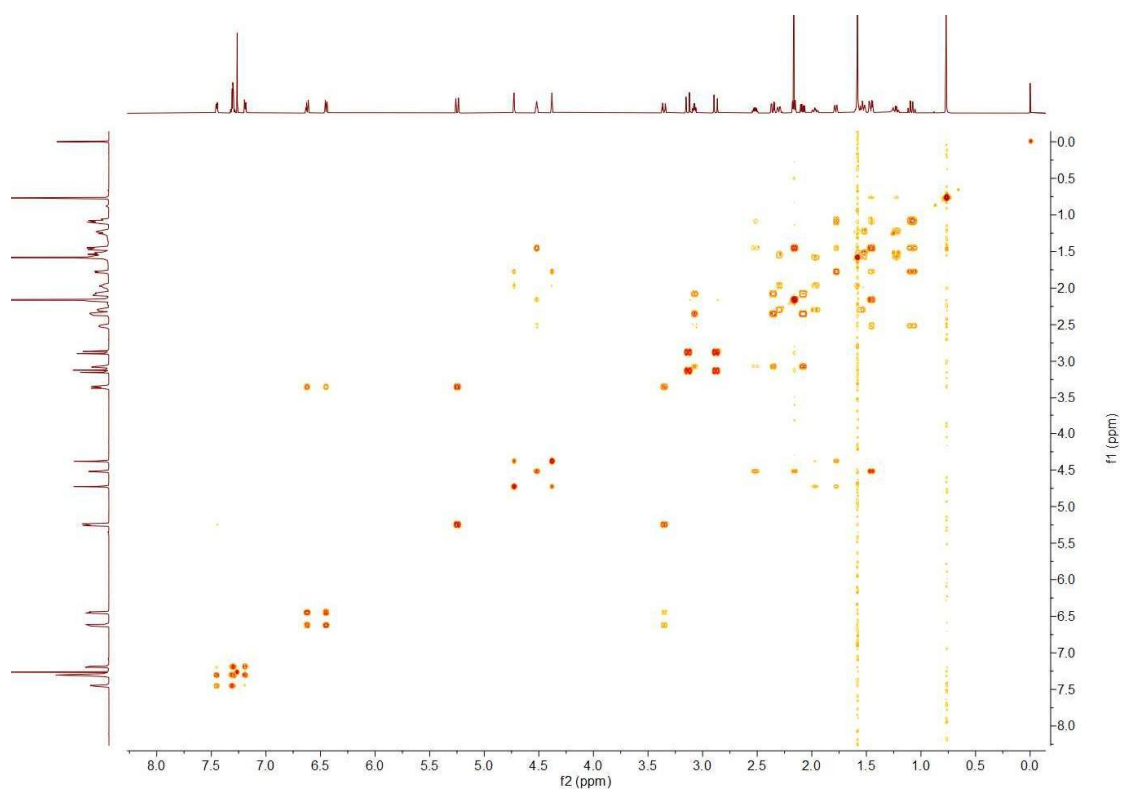

Cosy (600 MHz, CDCl<sub>3</sub>)

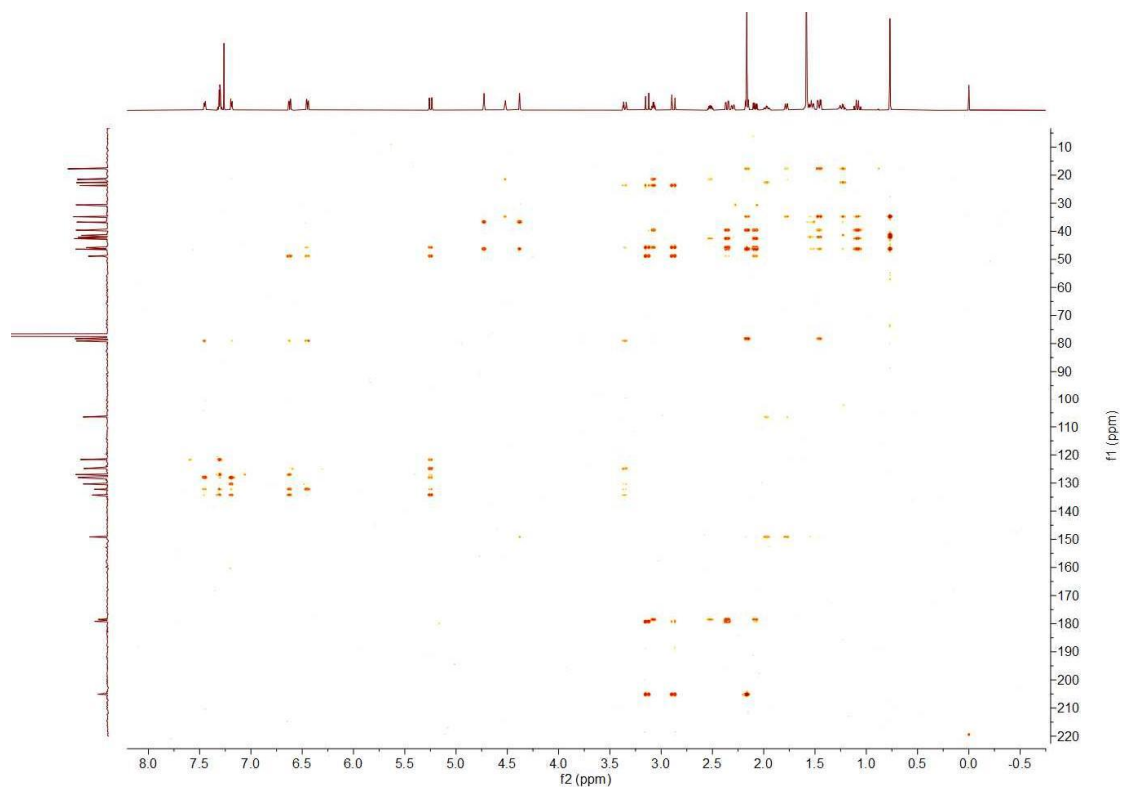

HMBC (600 MHz, CDCl<sub>3</sub>)

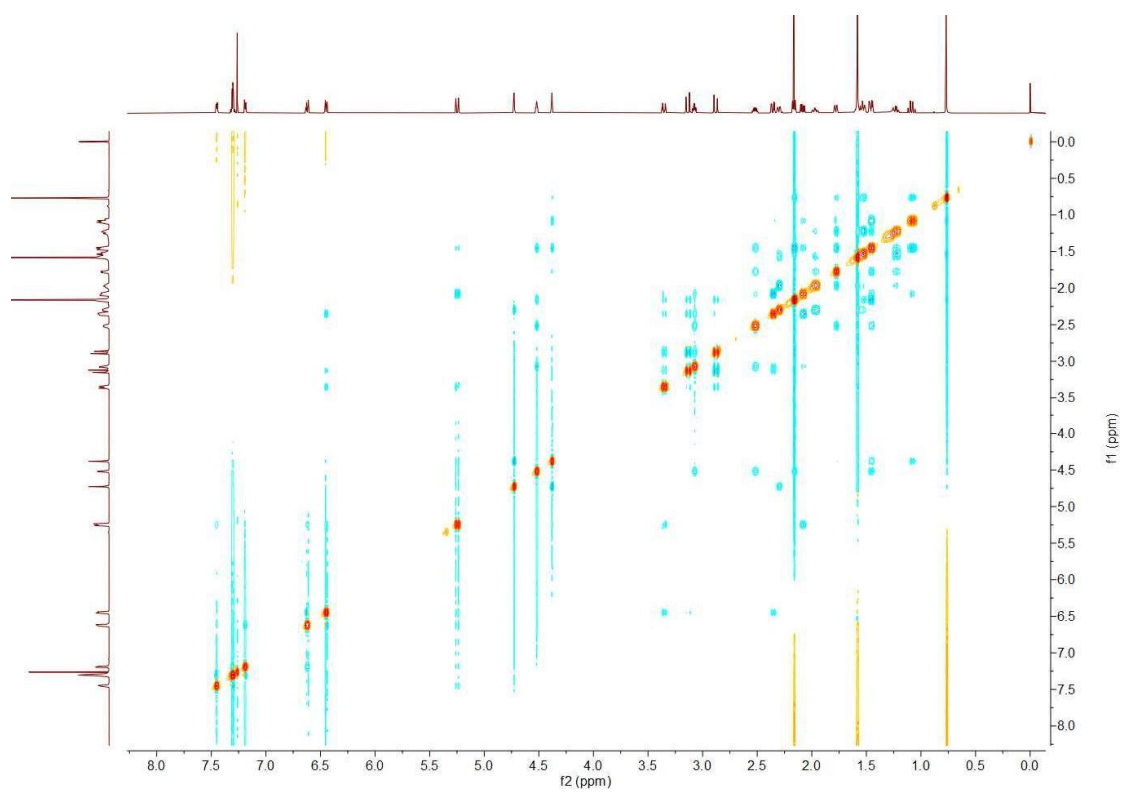

Noesy (600 MHz, CDCl<sub>3</sub>)

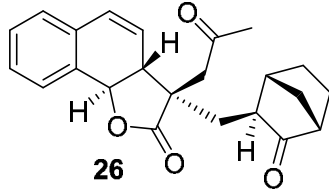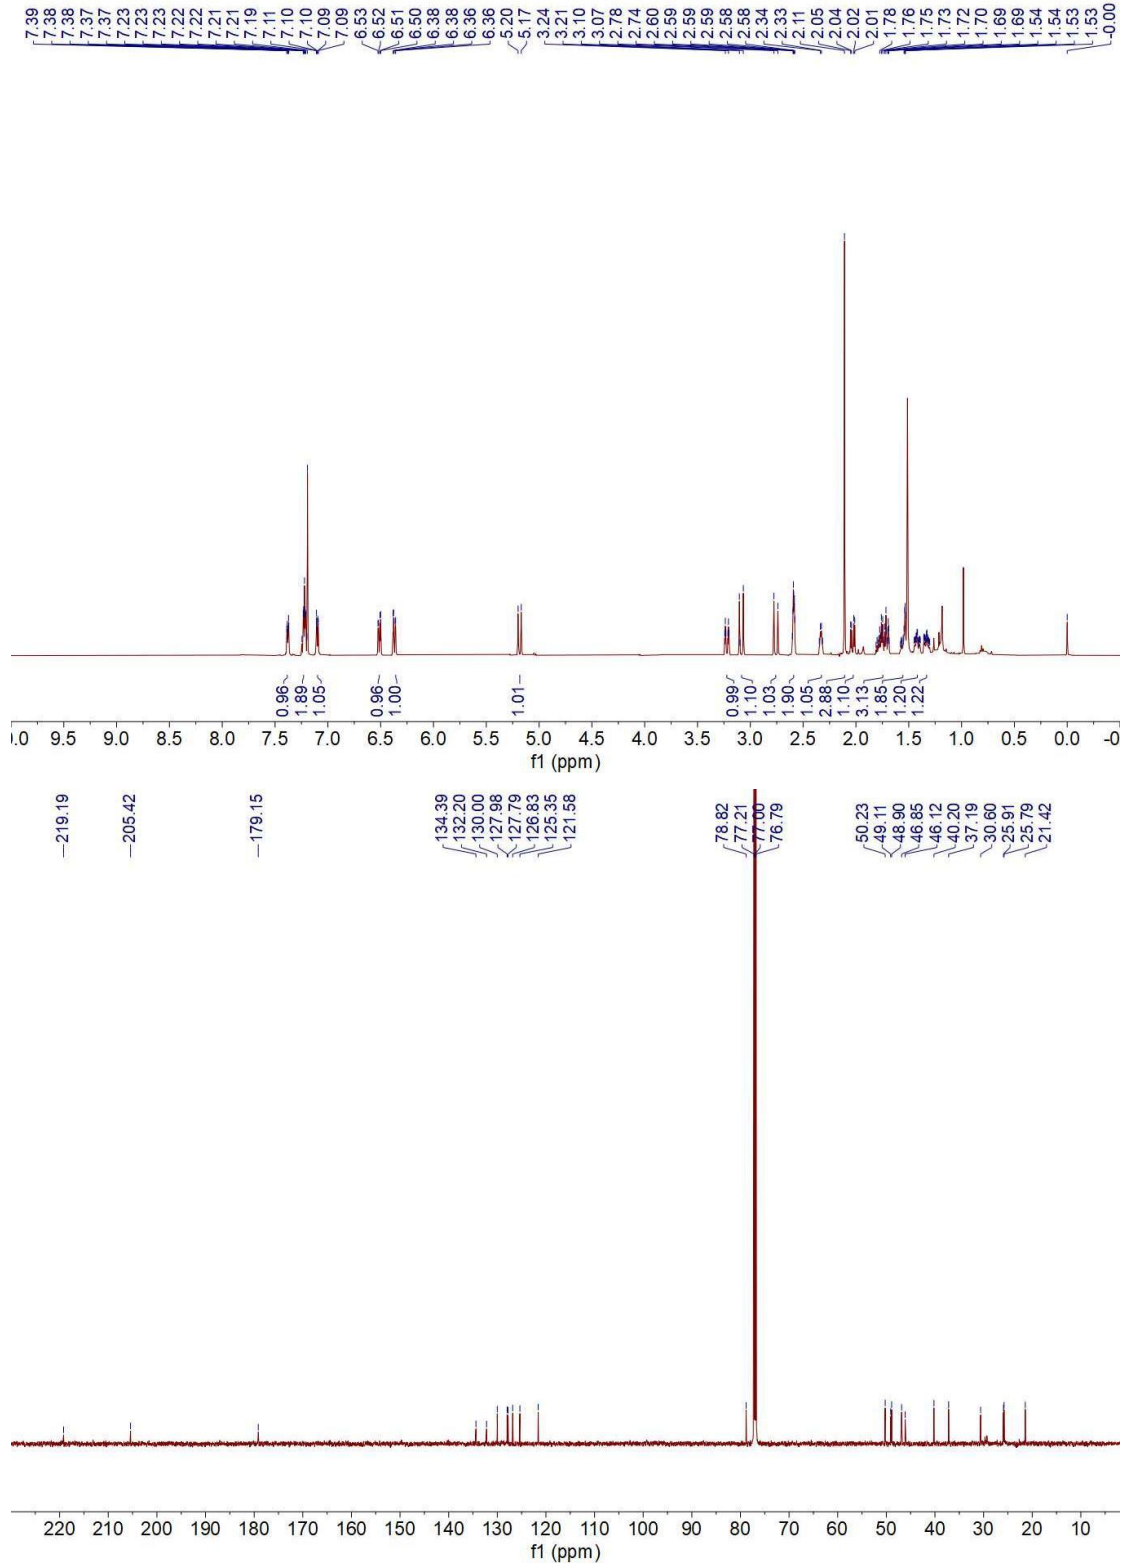

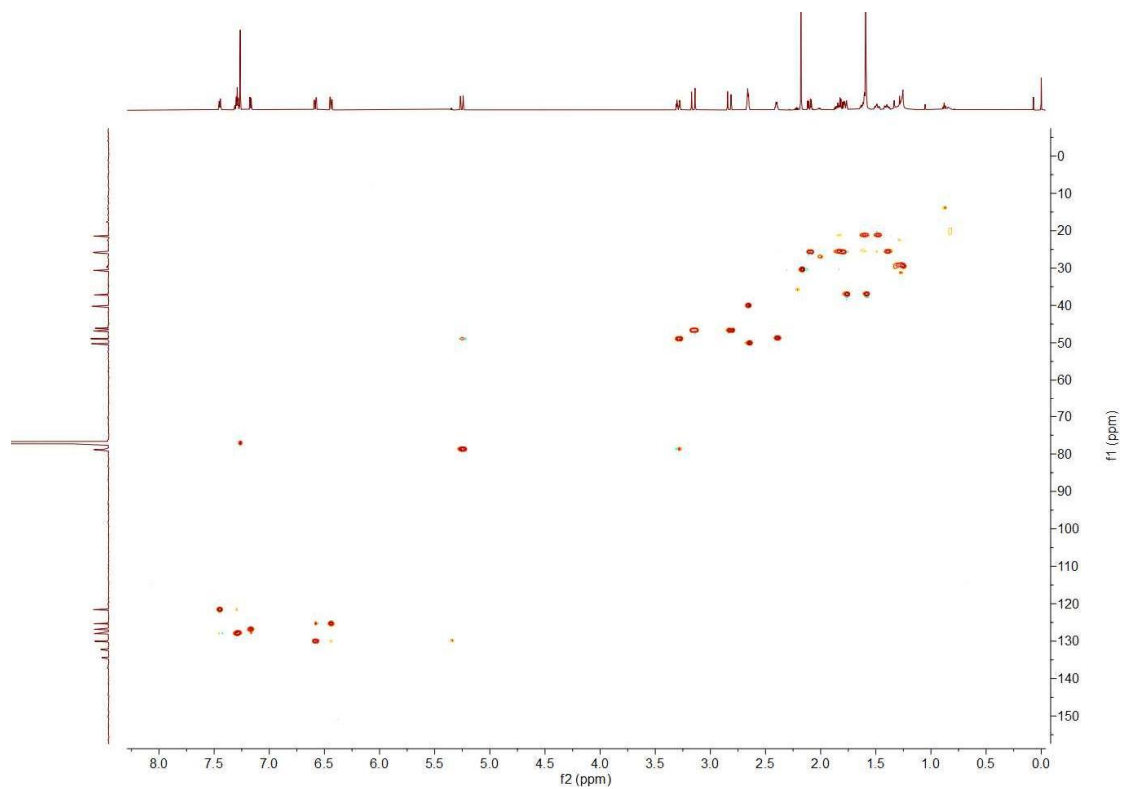

HSQC (600 MHz, CDCl<sub>3</sub>)

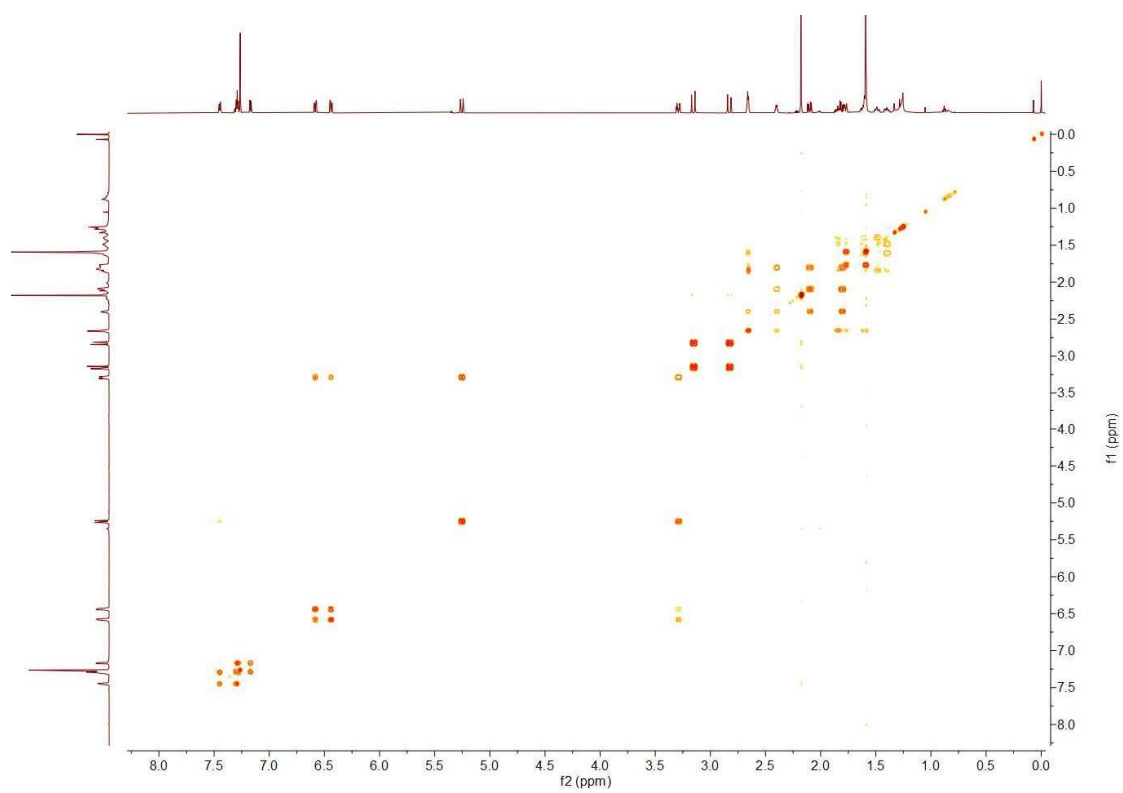

Cosy (600 MHz, CDCl<sub>3</sub>)

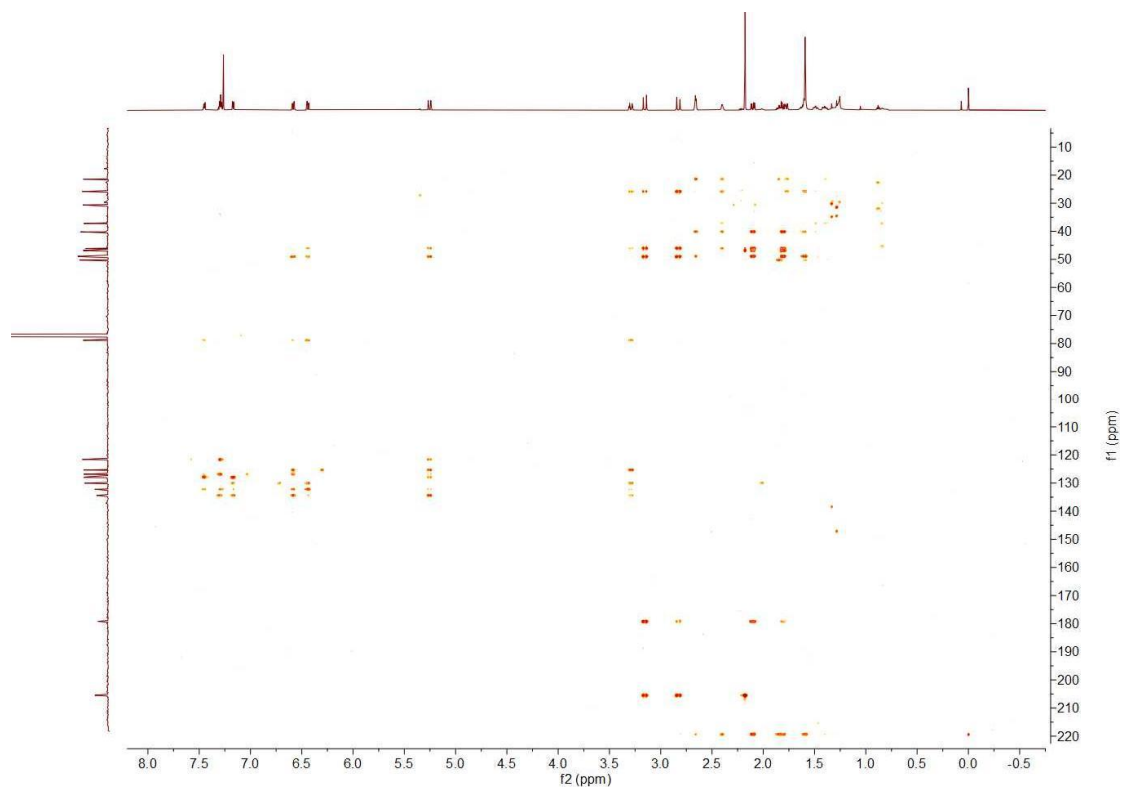

HMBC (600 MHz, CDCl<sub>3</sub>)

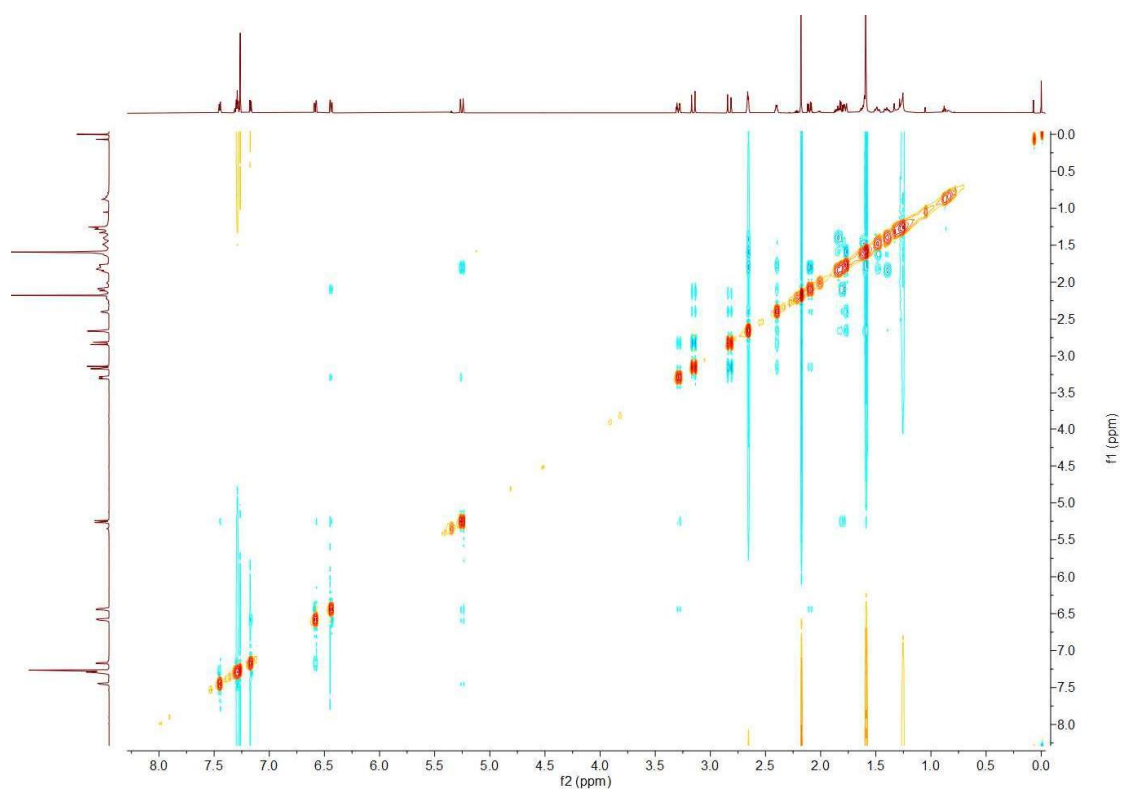

Noesy (600 MHz, CDCl<sub>3</sub>)

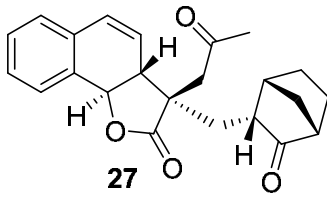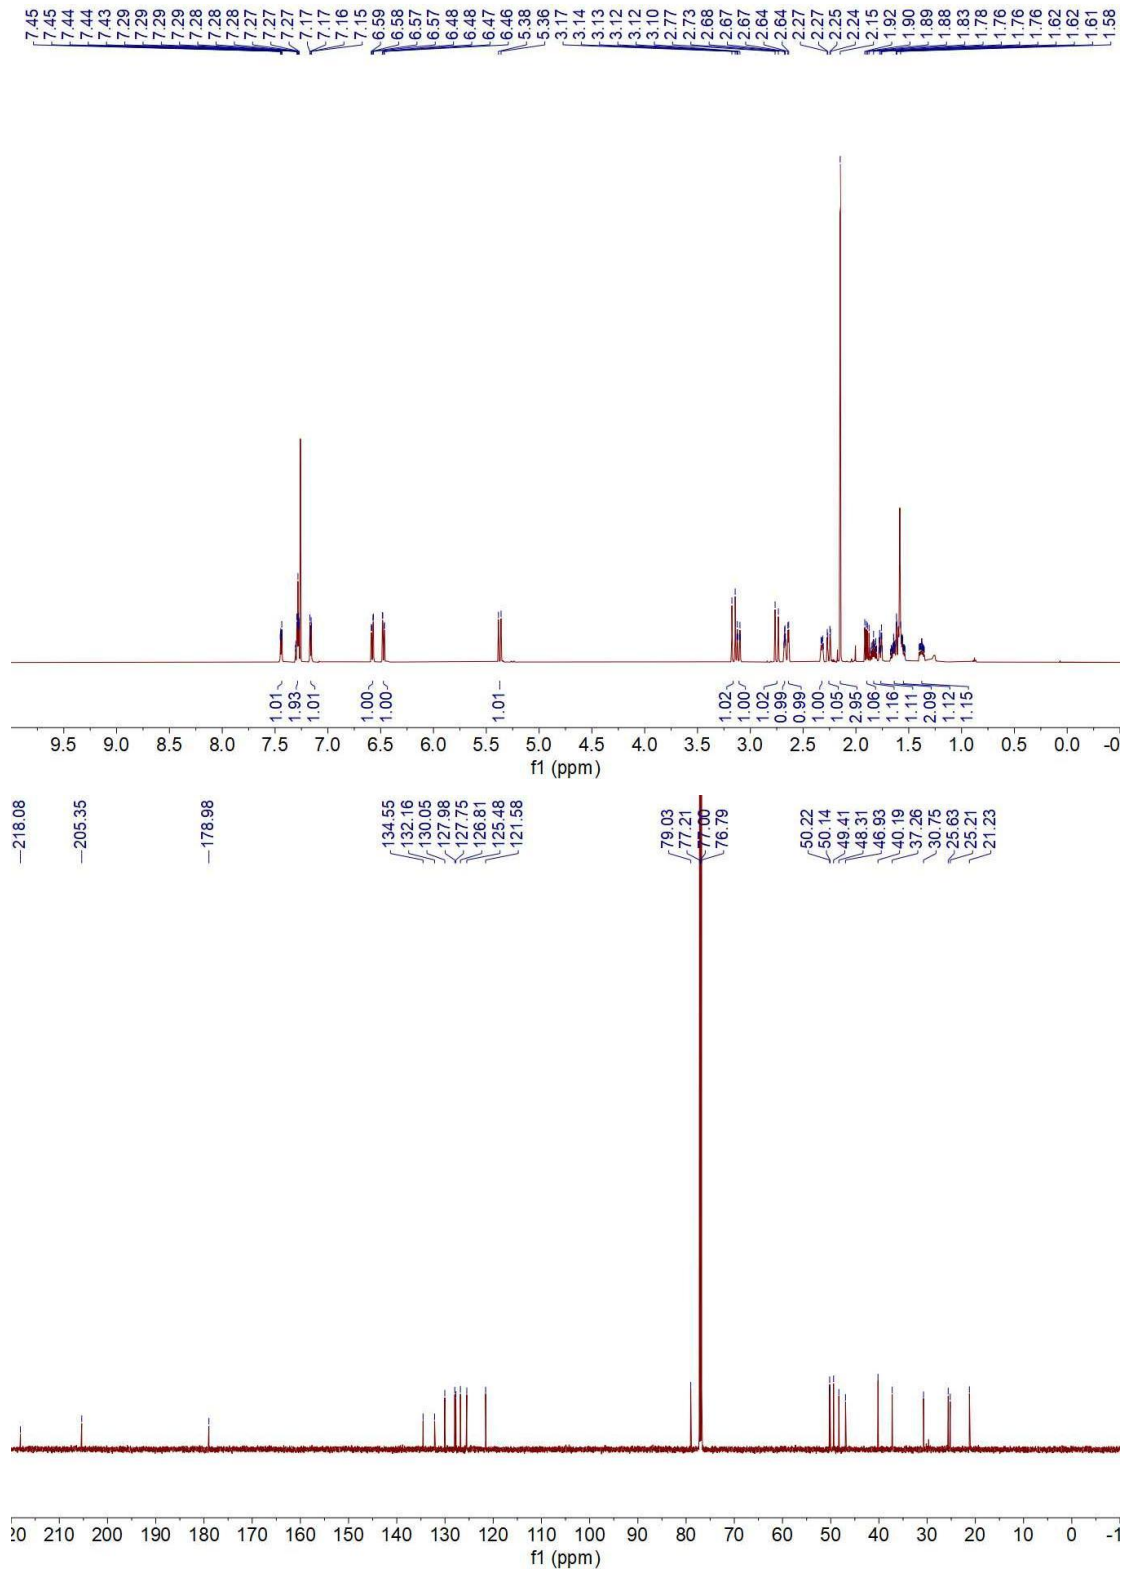

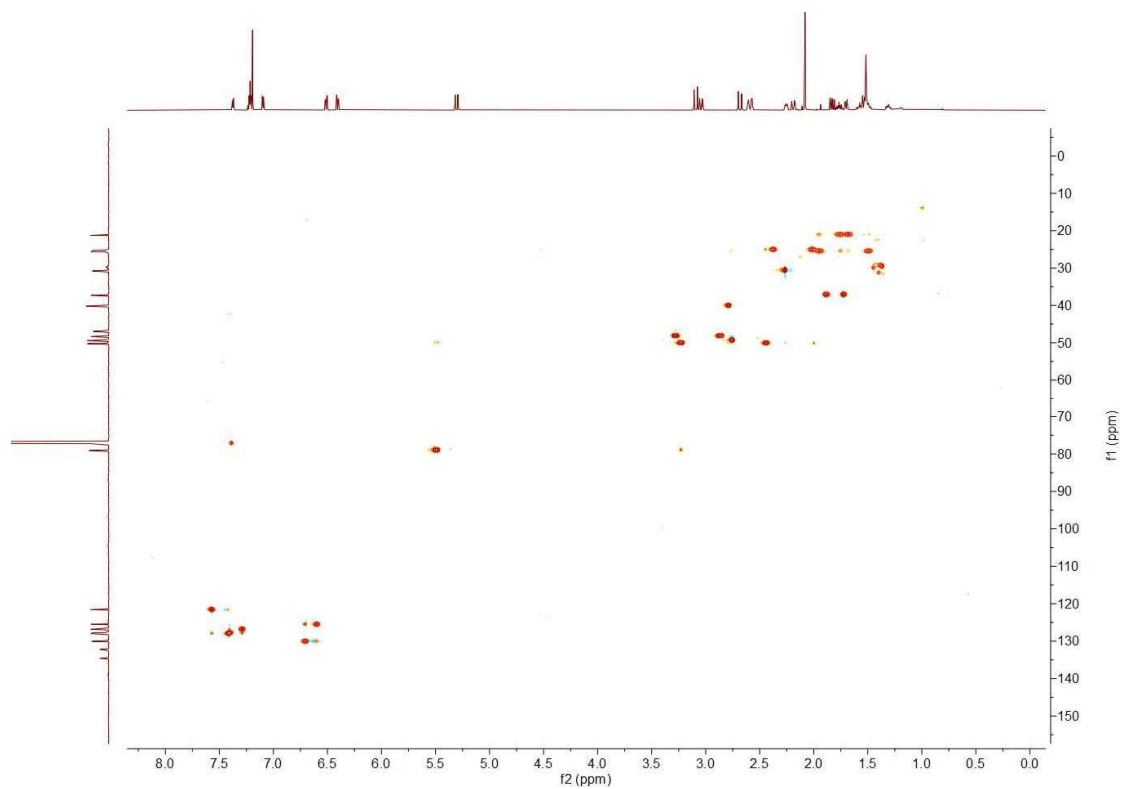

HSQC (600 MHz, CDCl<sub>3</sub>)

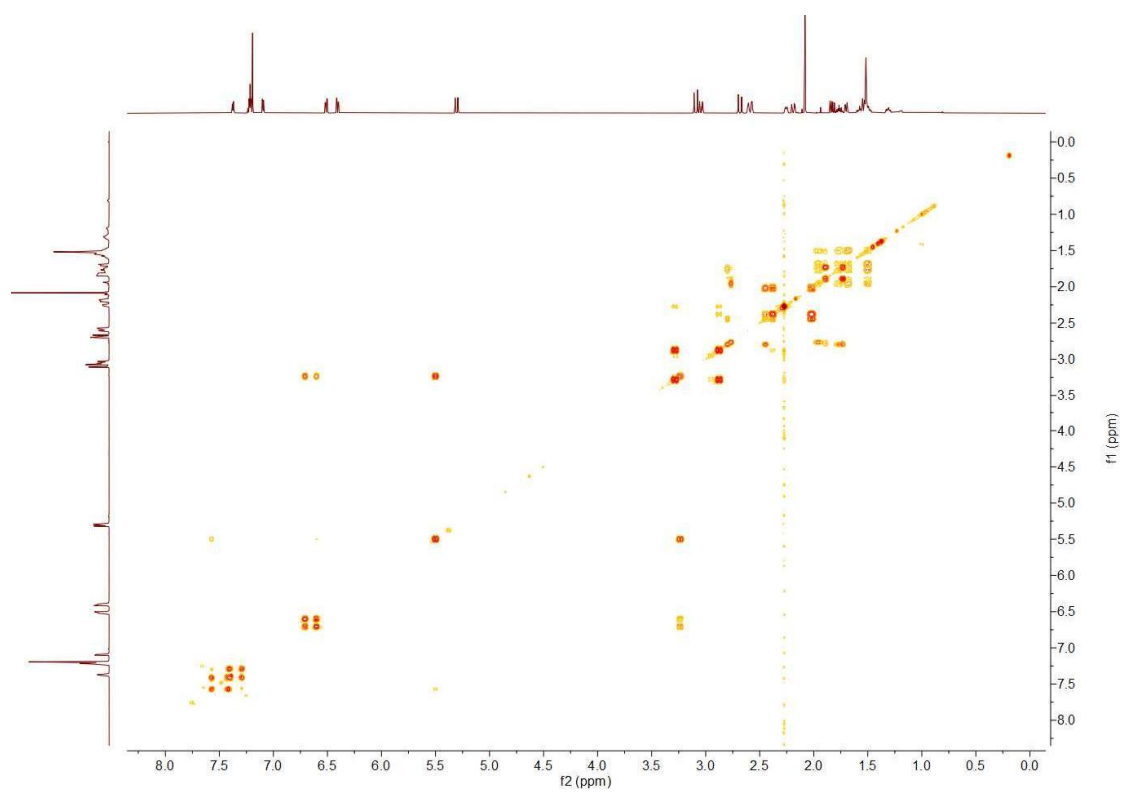

Cosy (600 MHz, CDCl<sub>3</sub>)

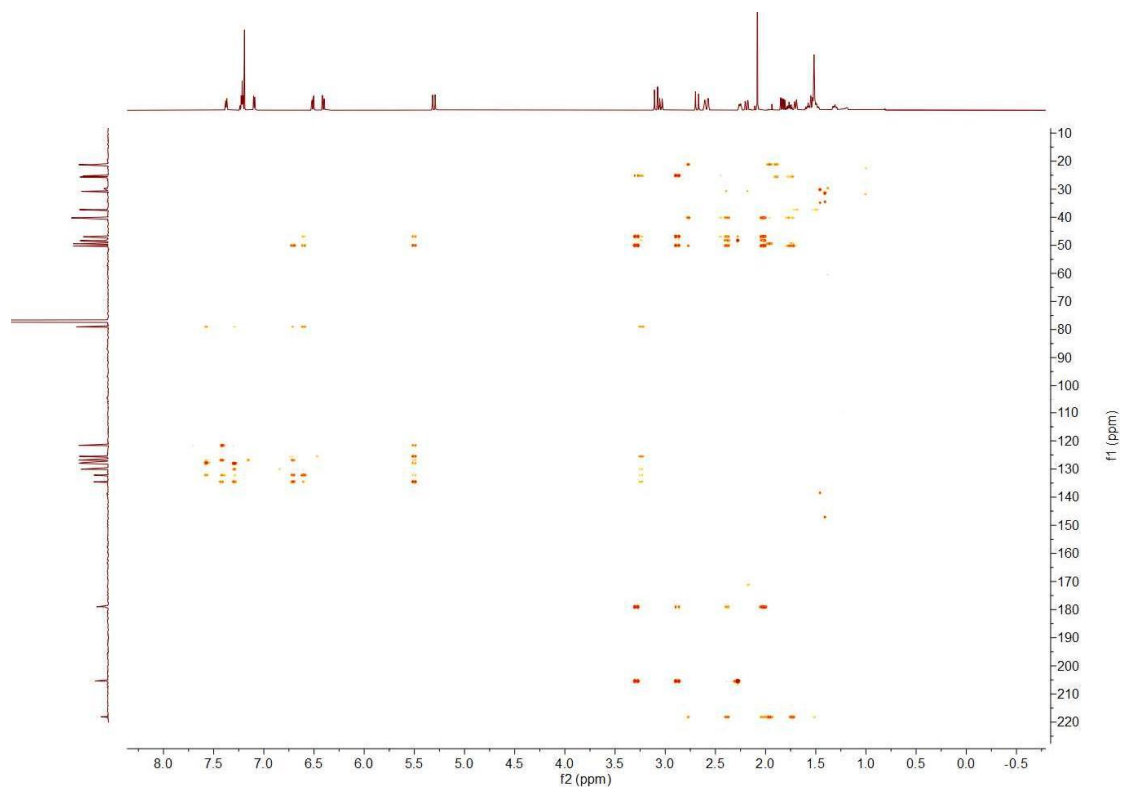

HMBC (600 MHz, CDCl<sub>3</sub>)

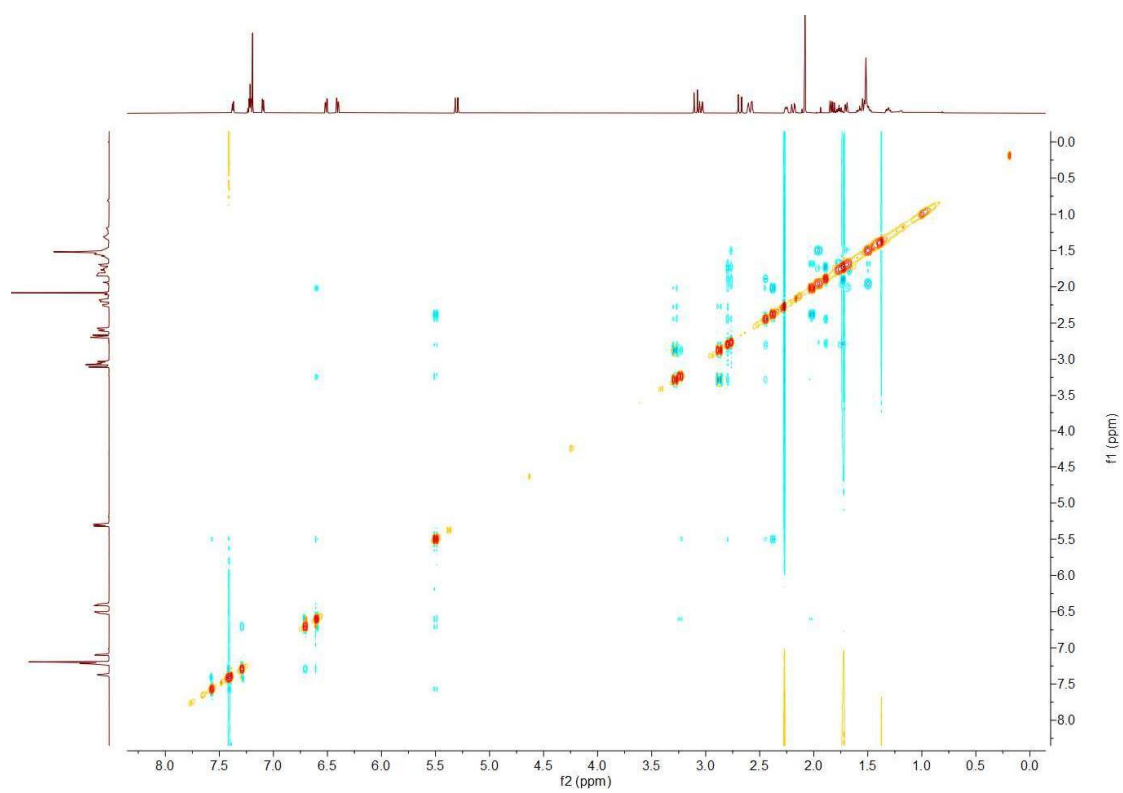

Noesy (600 MHz, CDCl<sub>3</sub>)

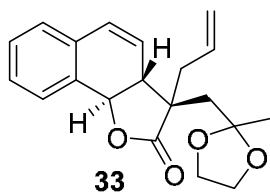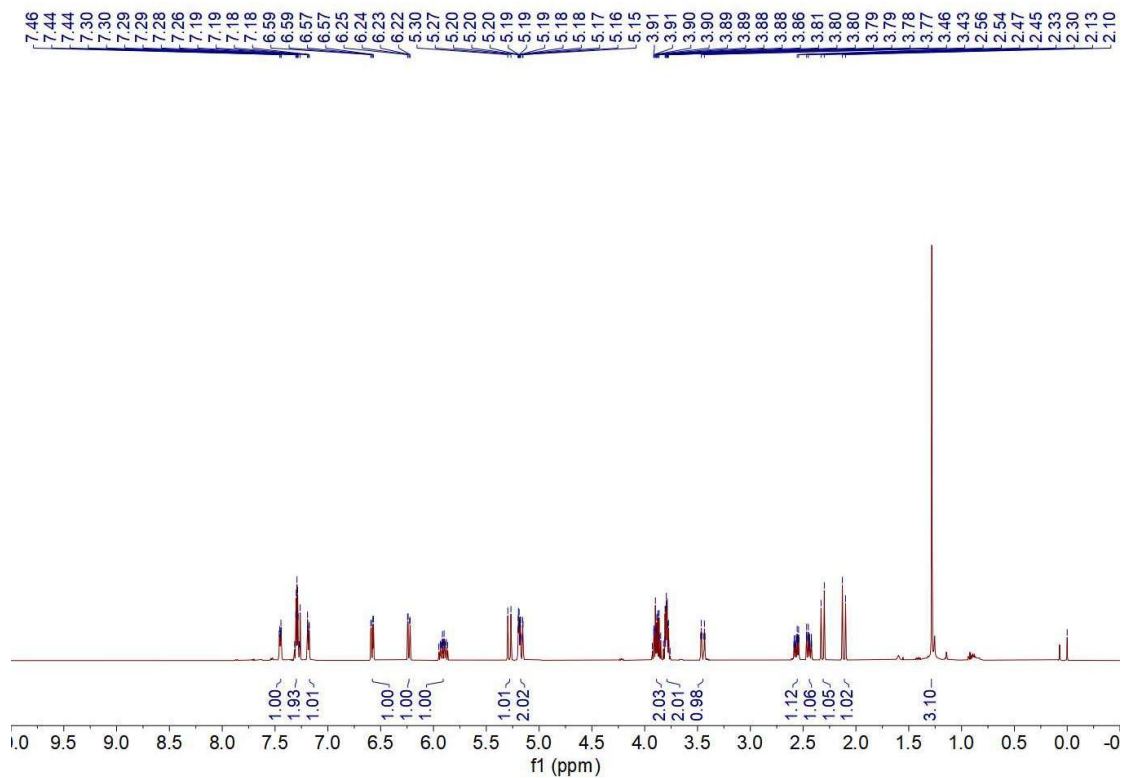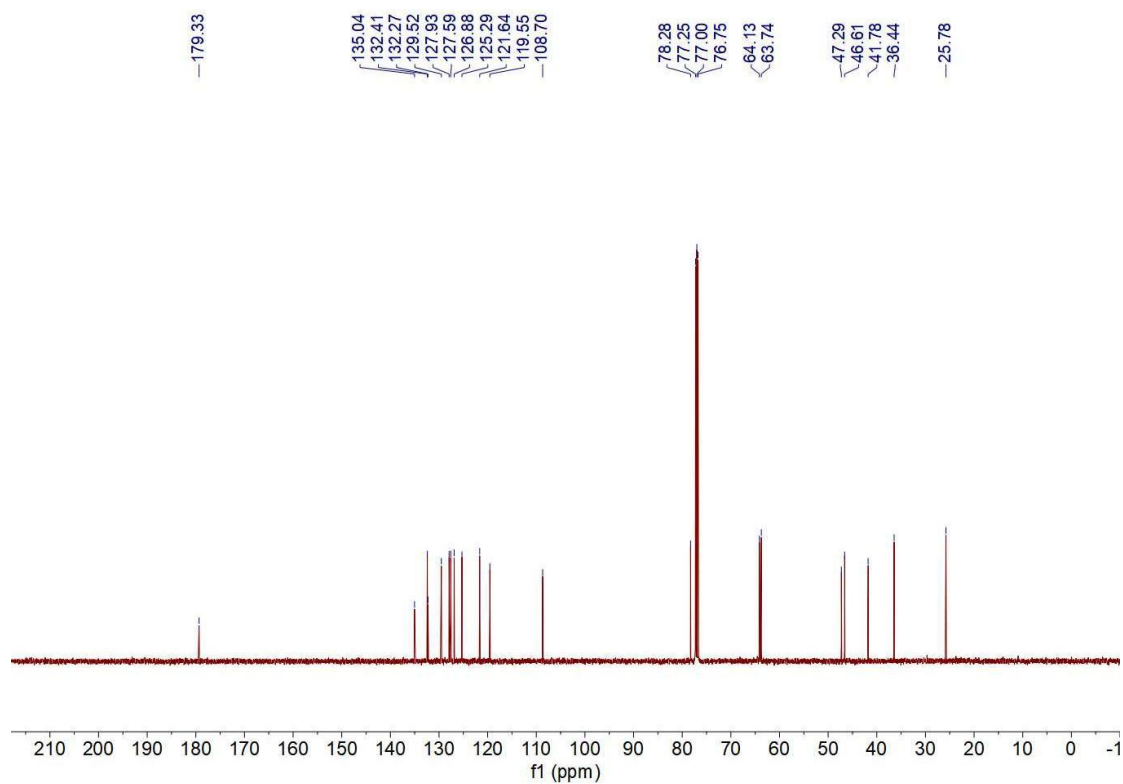

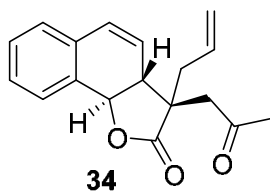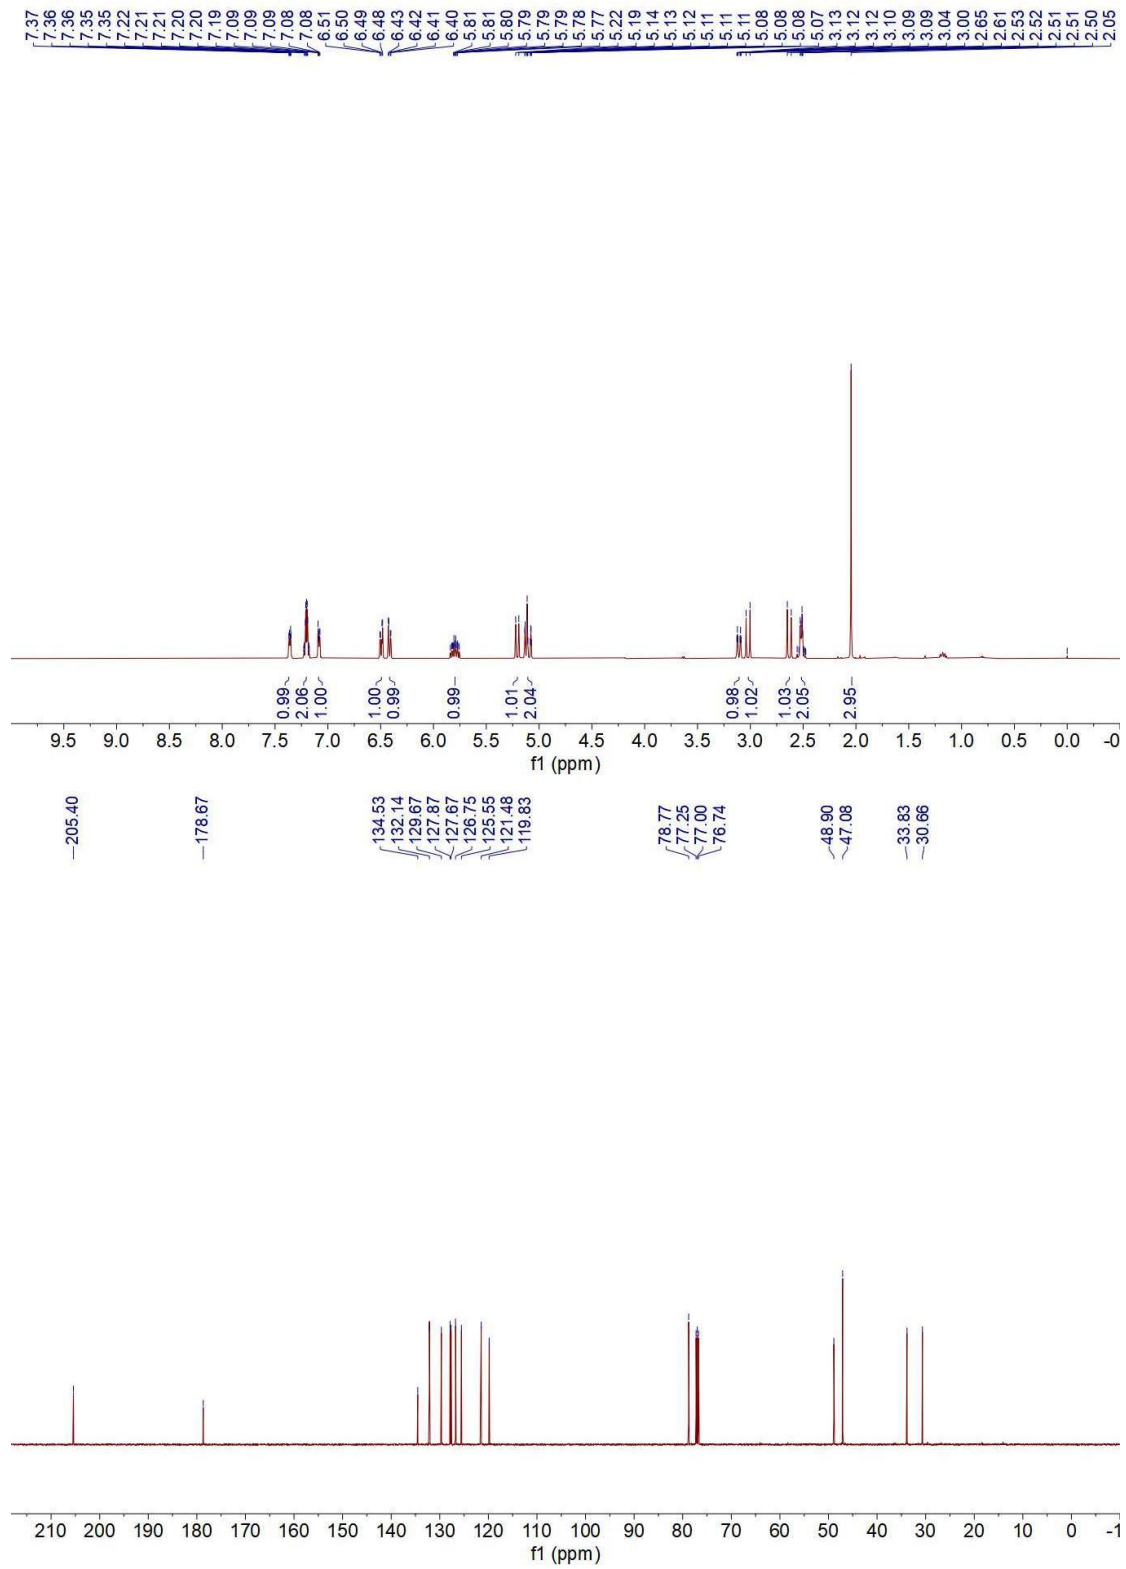

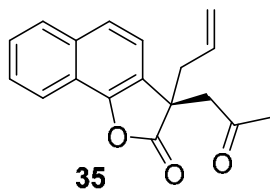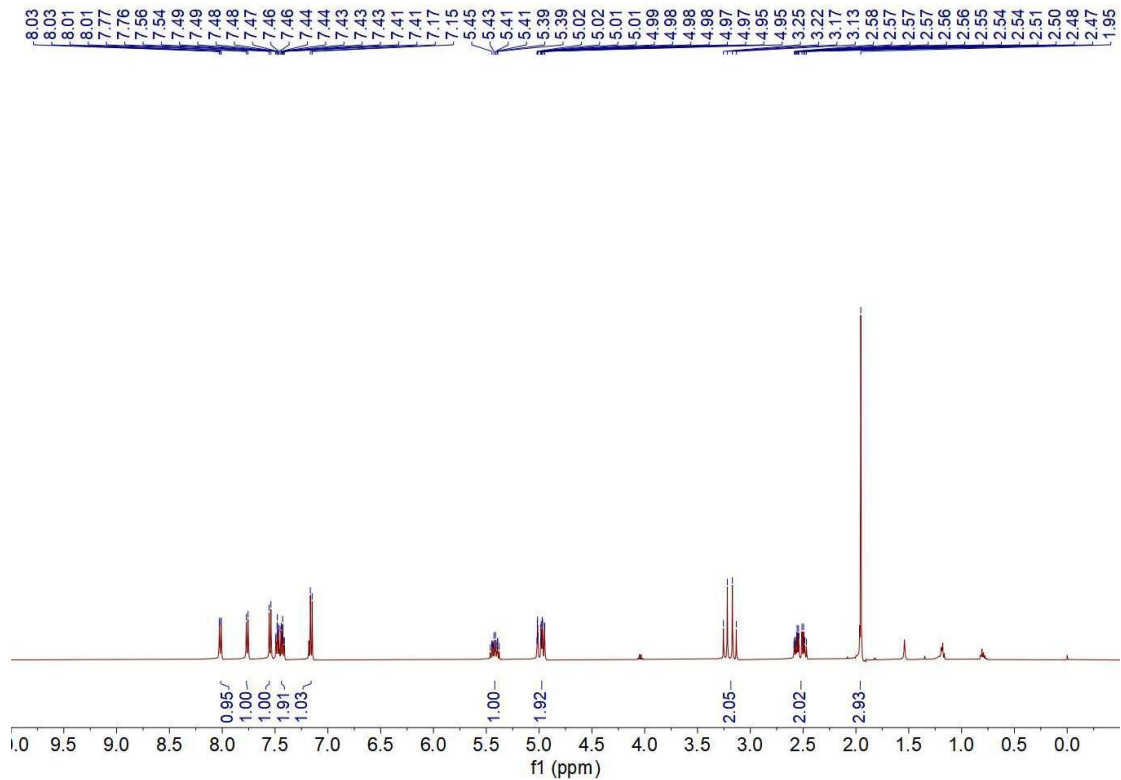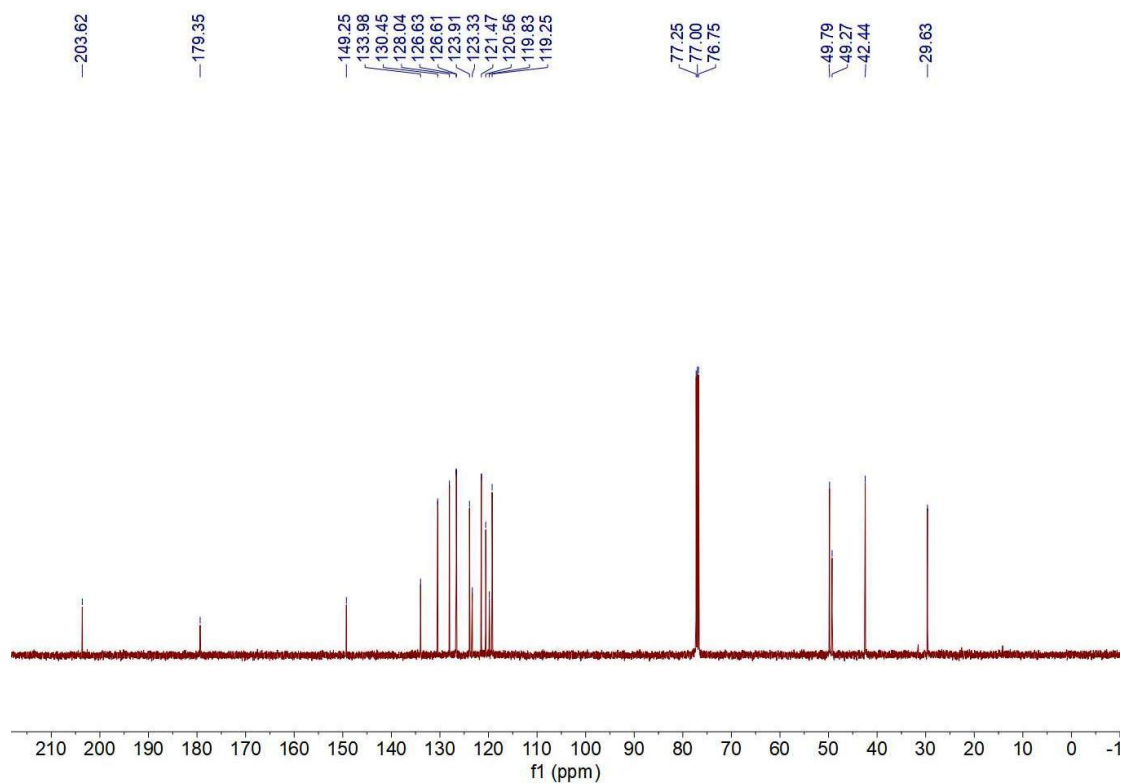

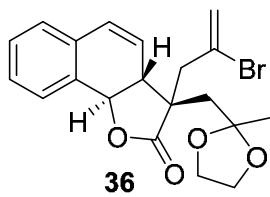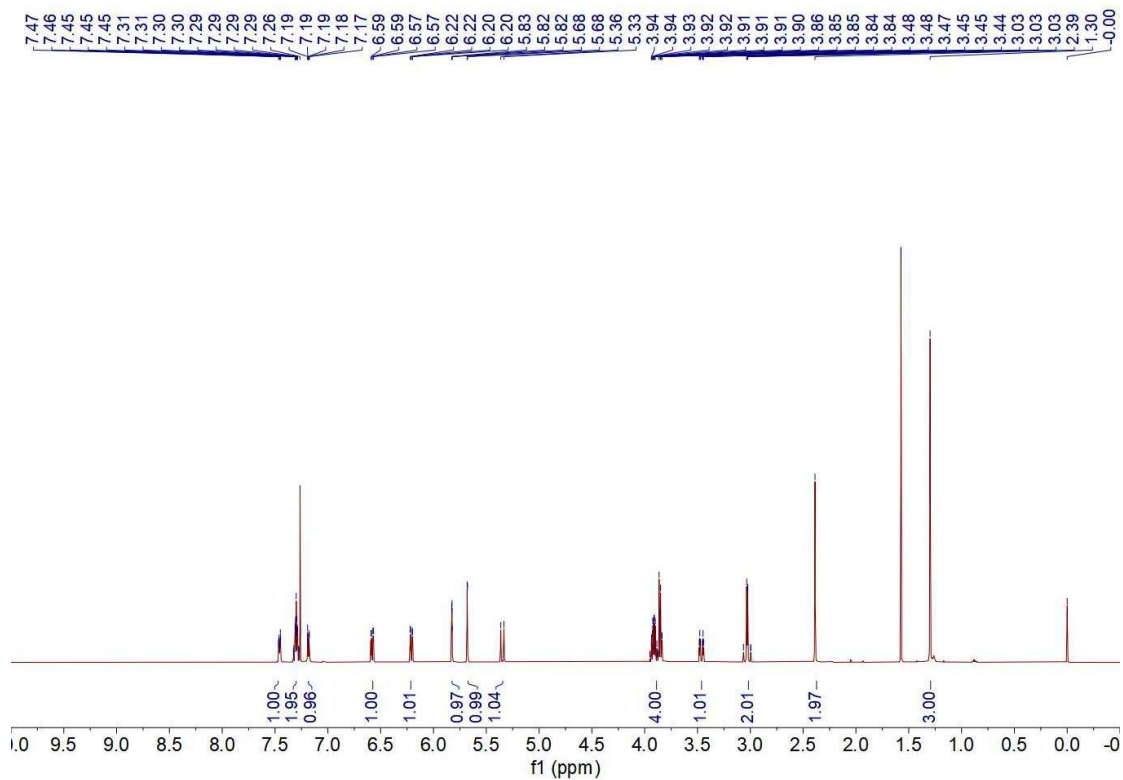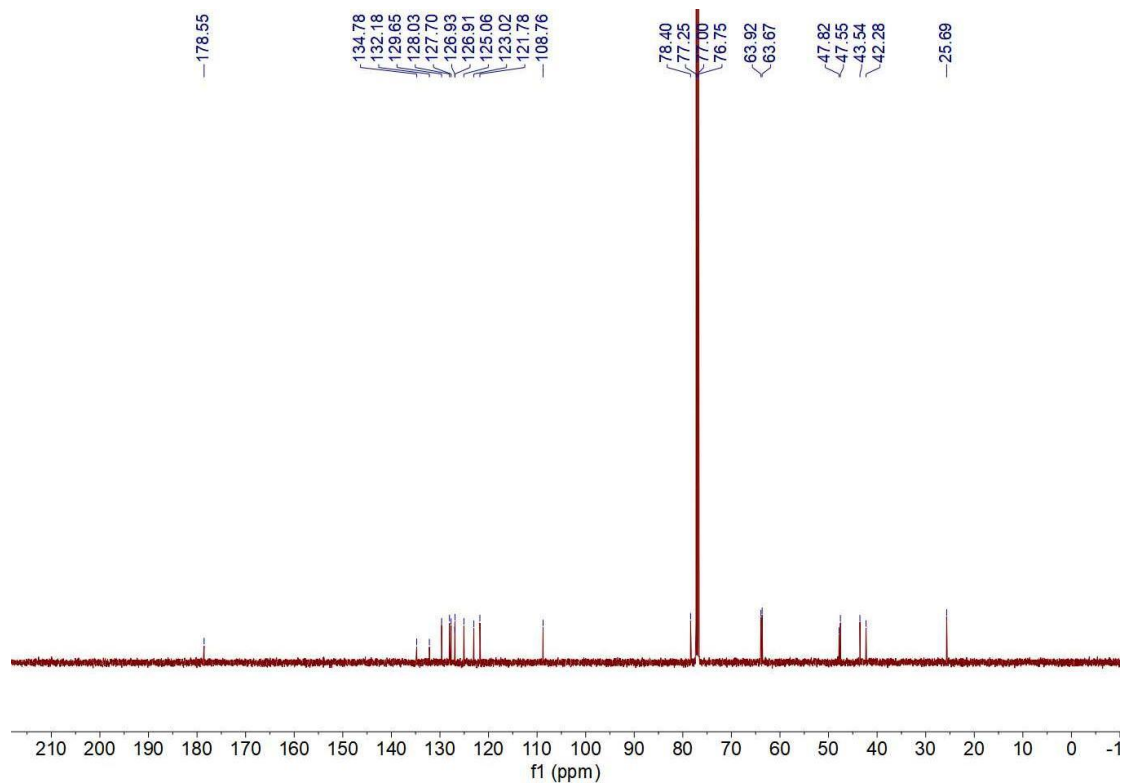

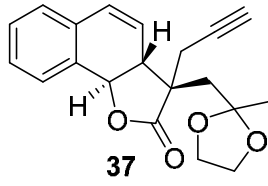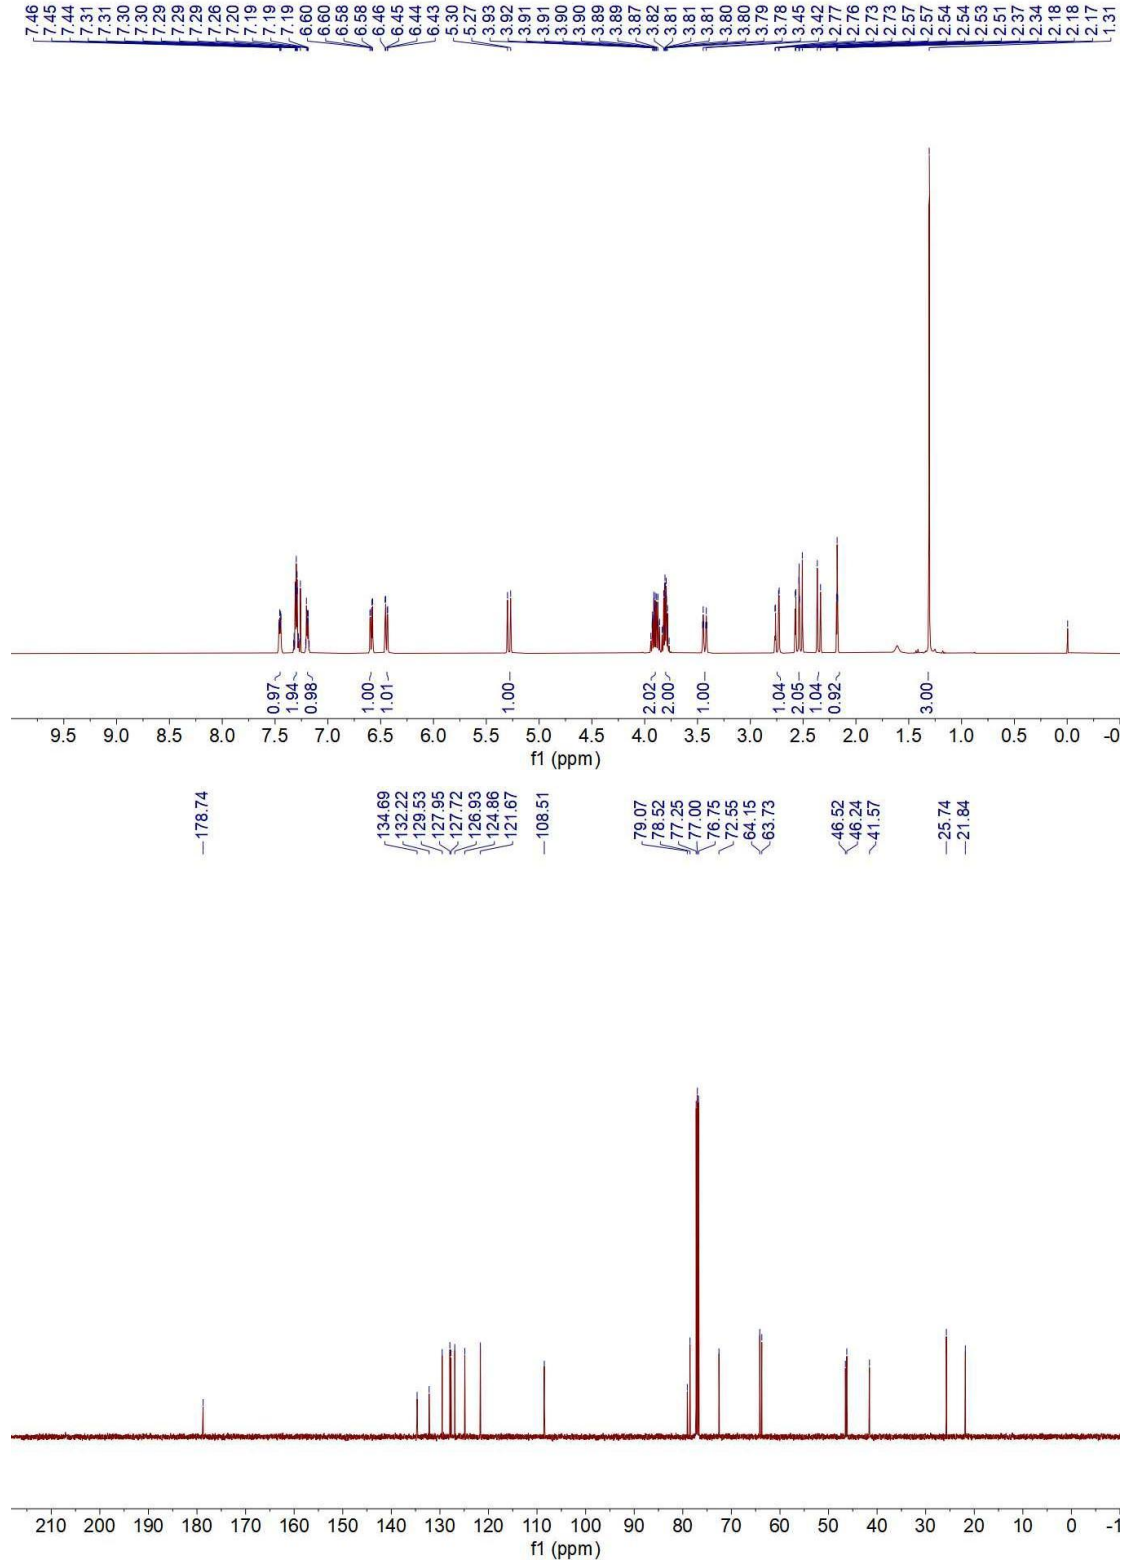

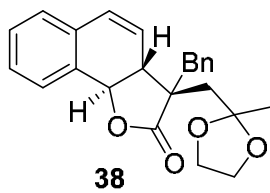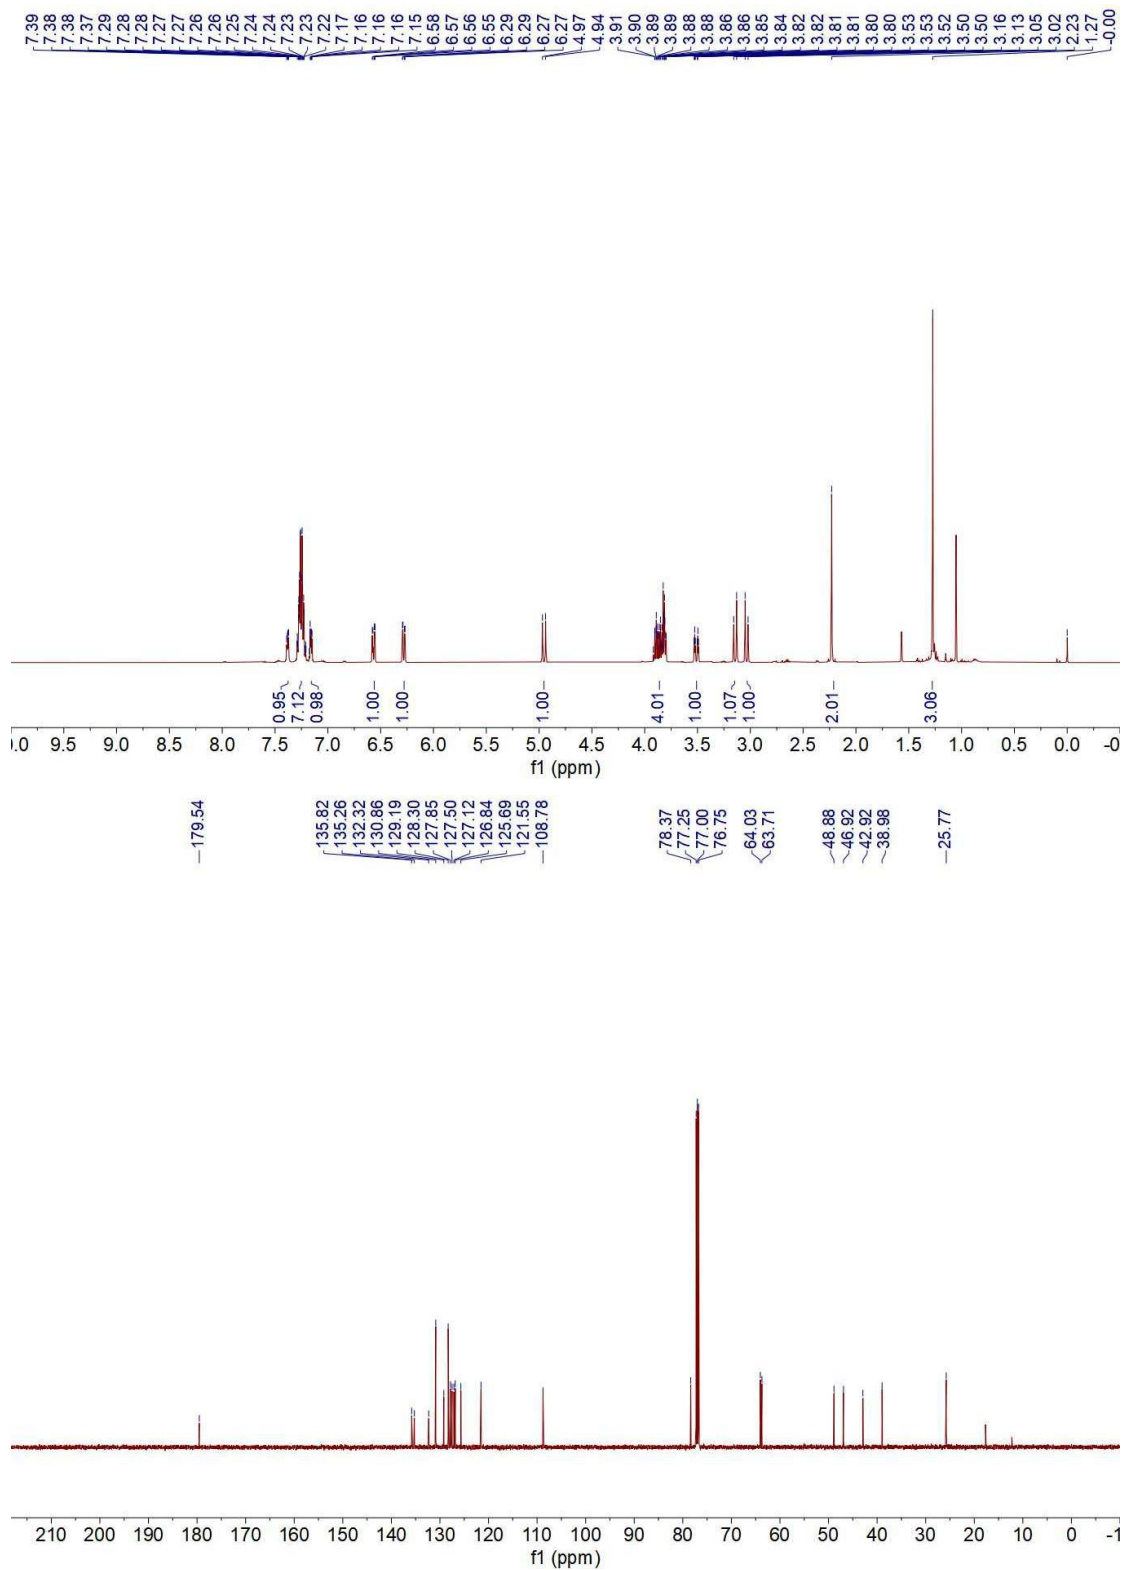

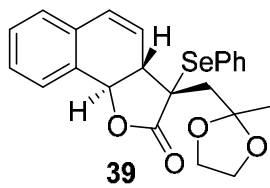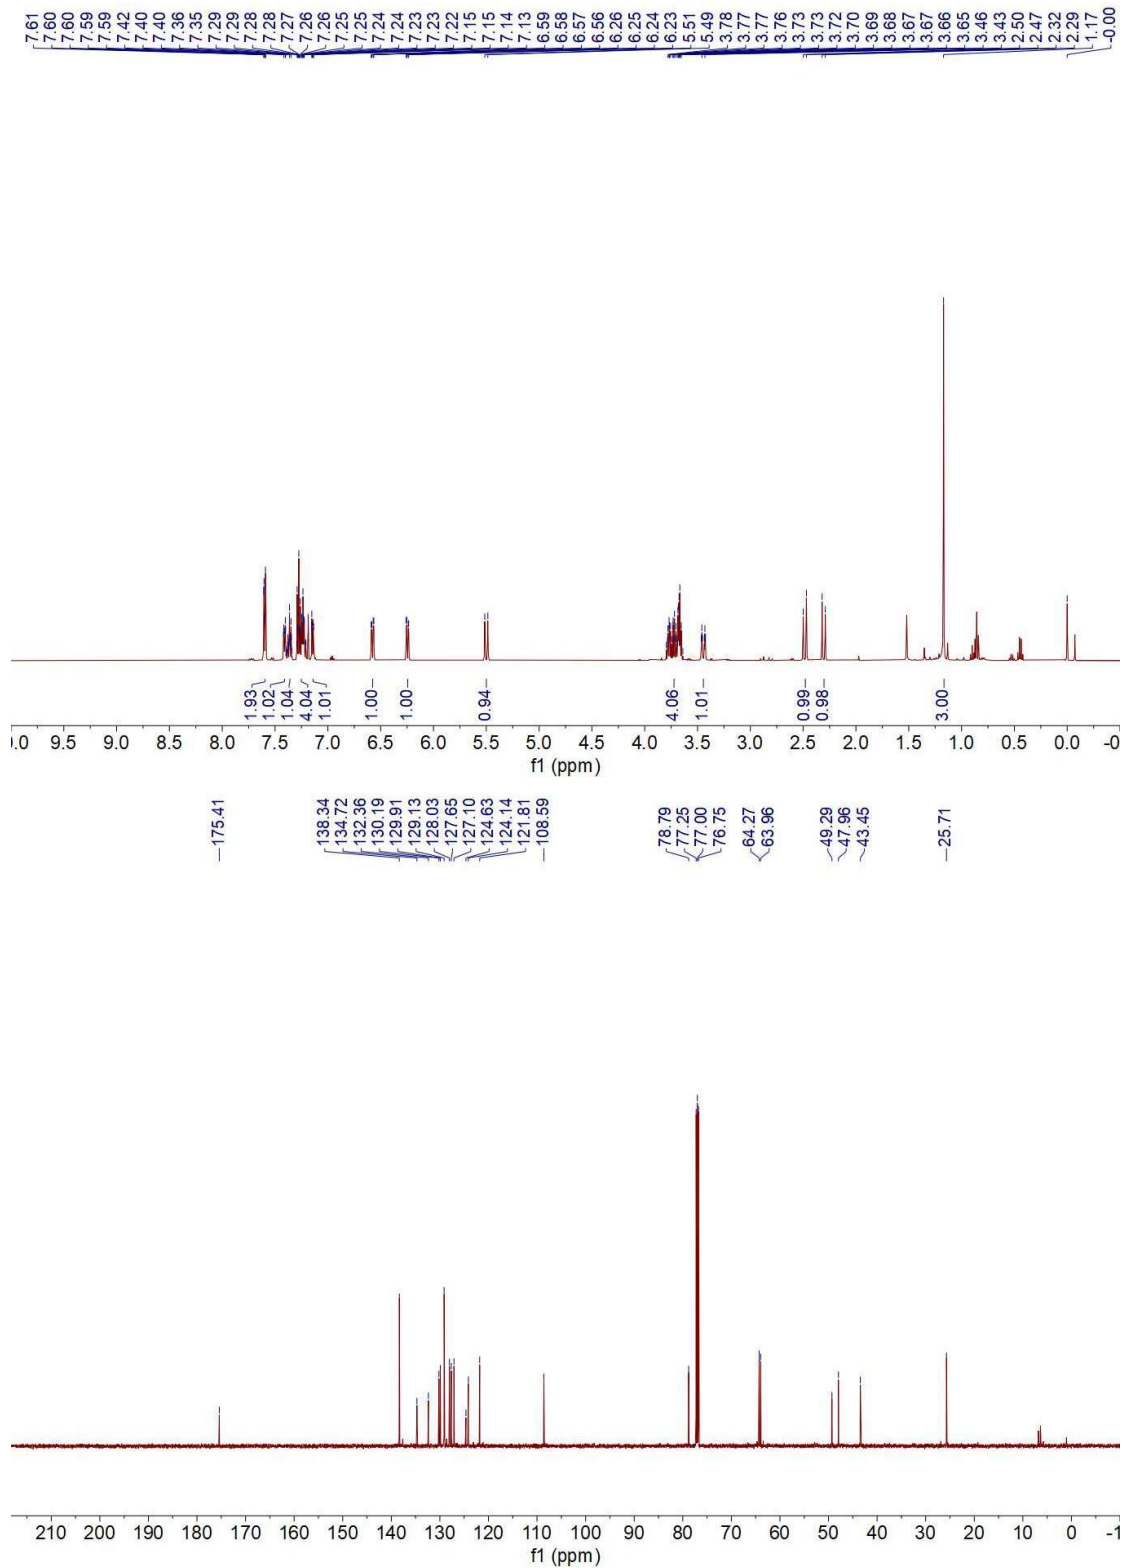

## 10. HPLC spectra

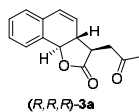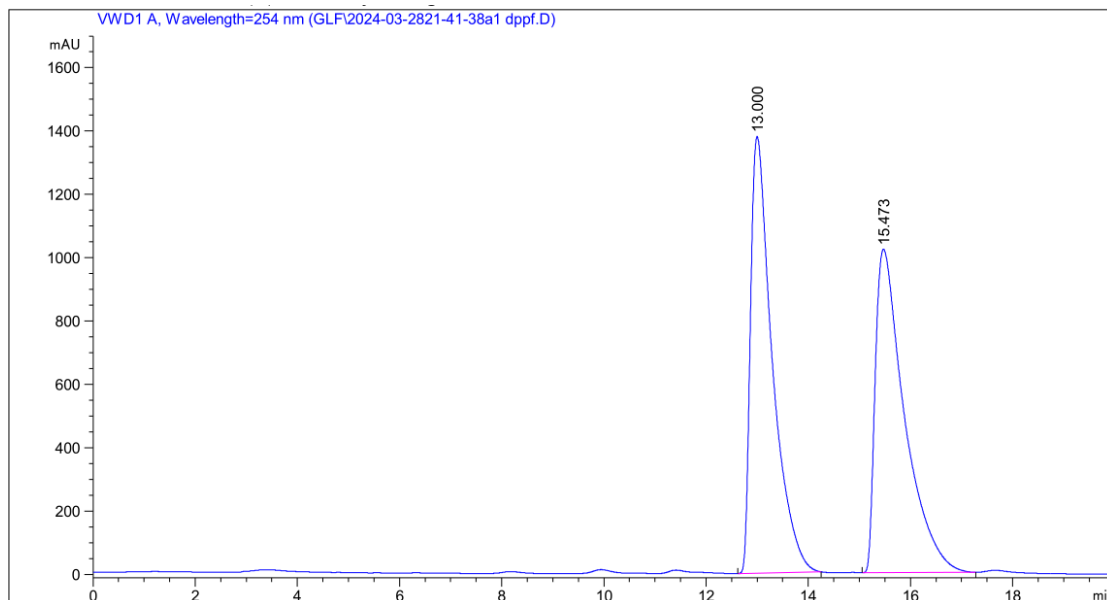

| Peak # | RetTime [min] | Type | Width [min] | Area [mAU*s] | Height [mAU] | Area %  |
|--------|---------------|------|-------------|--------------|--------------|---------|
| 1      | 13.000        | BBA  | 0.4344      | 4.08203e4    | 1378.83777   | 50.1907 |
| 2      | 15.473        | VB   | 0.5816      | 4.05101e4    | 1021.62250   | 49.8093 |

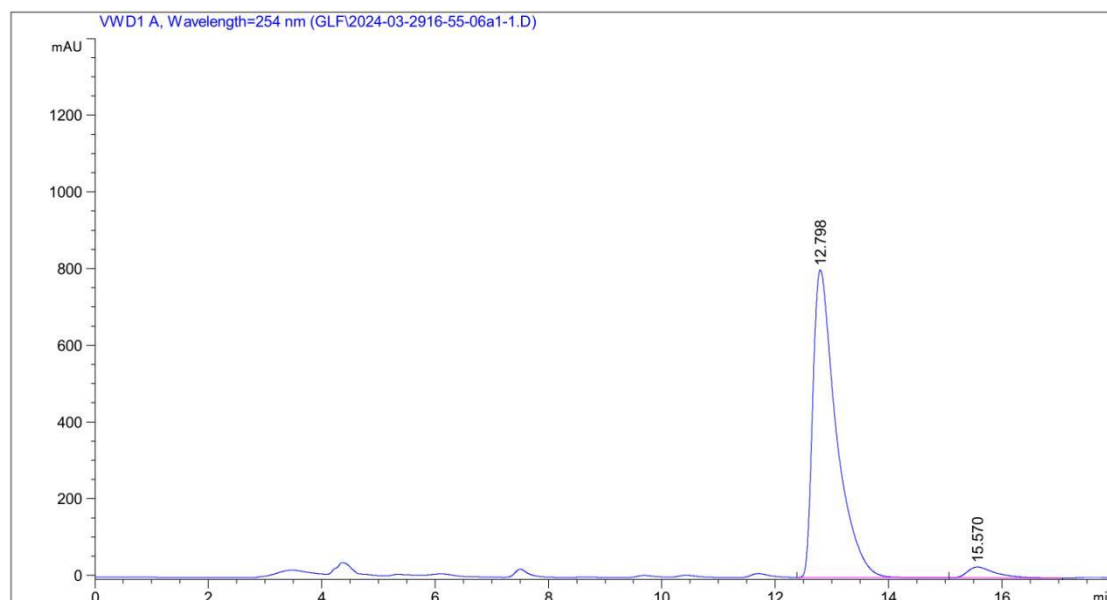

| Peak # | RetTime [min] | Type | Width [min] | Area [mAU*s] | Height [mAU] | Area %  |
|--------|---------------|------|-------------|--------------|--------------|---------|
| 1      | 12.798        | VBA  | 0.4220      | 2.29004e4    | 802.37042    | 96.0175 |
| 2      | 15.570        | BB   | 0.5013      | 949.84607    | 28.03418     | 3.9825  |

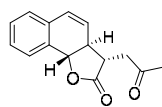

(S,S,S)-3a

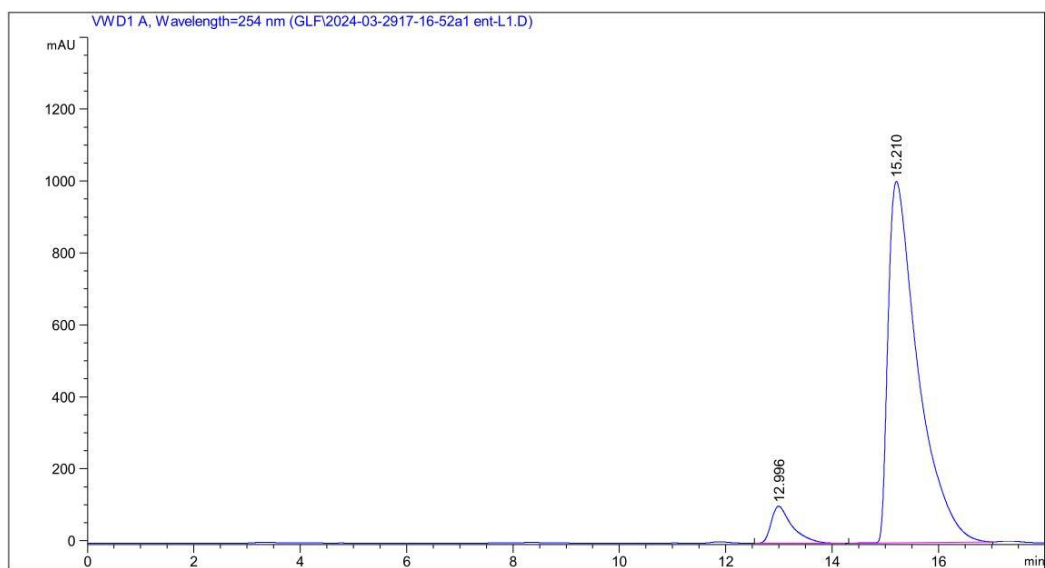

| Peak # | RetTime [min] | Type | Width [min] | Area [mAU*s] | Height [mAU] | Area %  |
|--------|---------------|------|-------------|--------------|--------------|---------|
| 1      | 12.996        | BB   | 0.3997      | 2816.30469   | 103.09399    | 6.7326  |
| 2      | 15.210        | VB R | 0.5739      | 3.90143e4    | 1004.90173   | 93.2674 |

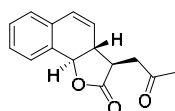

Gram-scale reaction of (R,R,R)-3a

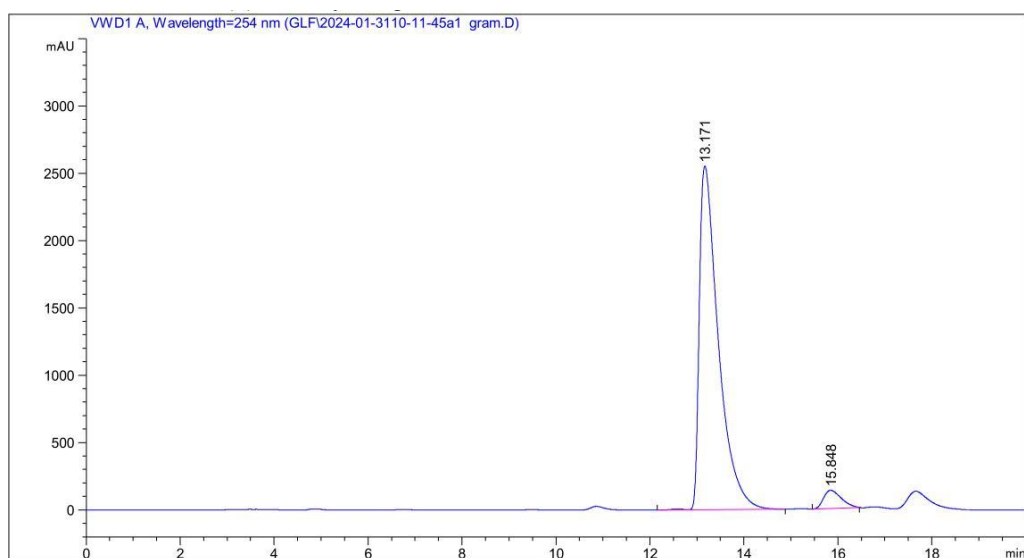

| Peak # | RetTime [min] | Type | Width [min] | Area [mAU*s] | Height [mAU] | Area %  |
|--------|---------------|------|-------------|--------------|--------------|---------|
| 1      | 13.171        | VB R | 0.4151      | 7.19555e4    | 2553.76660   | 95.3345 |
| 2      | 15.848        | BBA  | 0.4114      | 3521.35327   | 134.95117    | 4.6655  |

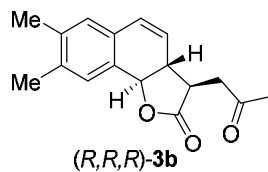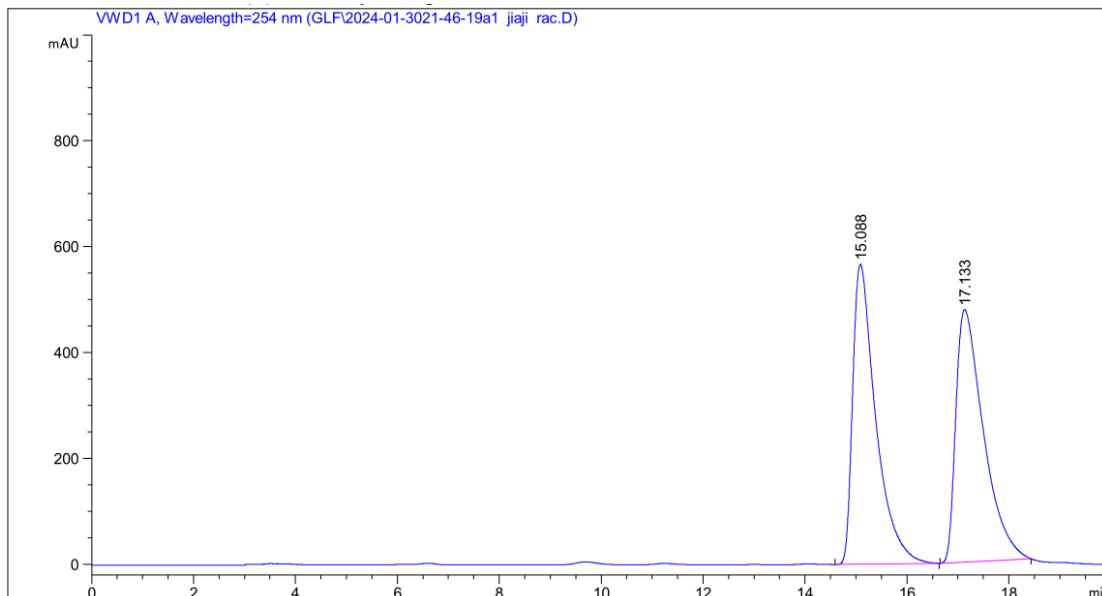

| Peak # | RetTime [min] | Type | Width [min] | Area [mAU*s] | Height [mAU] | Area %  |
|--------|---------------|------|-------------|--------------|--------------|---------|
| 1      | 15.088        | BB   | 0.4644      | 1.78405e4    | 566.51367    | 49.8618 |
| 2      | 17.133        | BBA  | 0.5629      | 1.79393e4    | 476.83020    | 50.1382 |

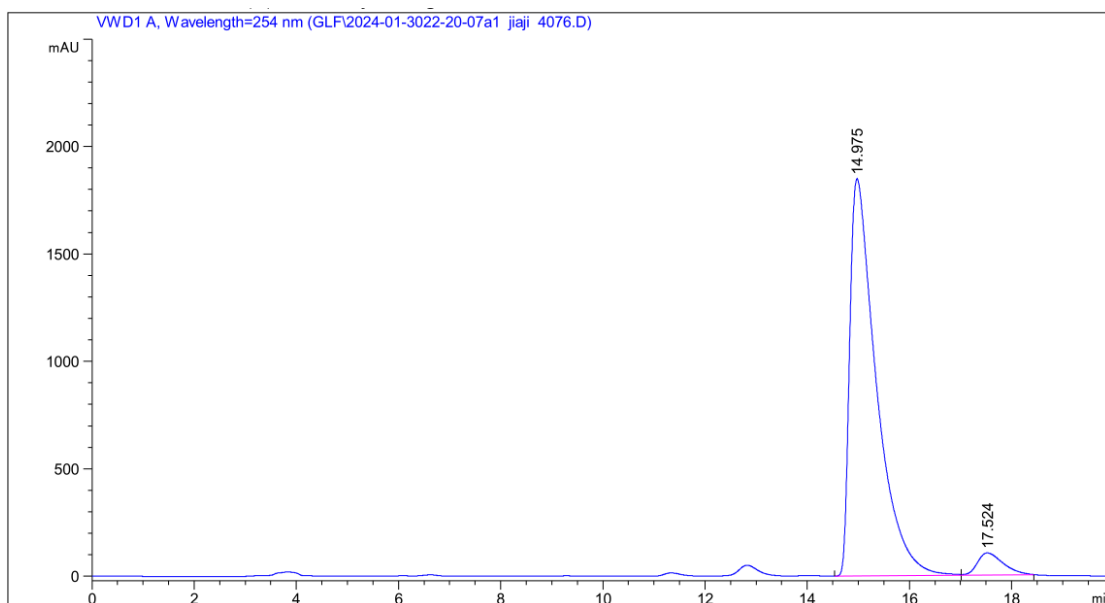

| Peak # | RetTime [min] | Type | Width [min] | Area [mAU*s] | Height [mAU] | Area %  |
|--------|---------------|------|-------------|--------------|--------------|---------|
| 1      | 14.975        | BV   | 0.5206      | 6.66364e4    | 1848.37341   | 94.9169 |
| 2      | 17.524        | VBA  | 0.5317      | 3568.59790   | 102.63236    | 5.0831  |

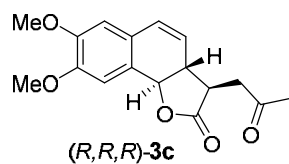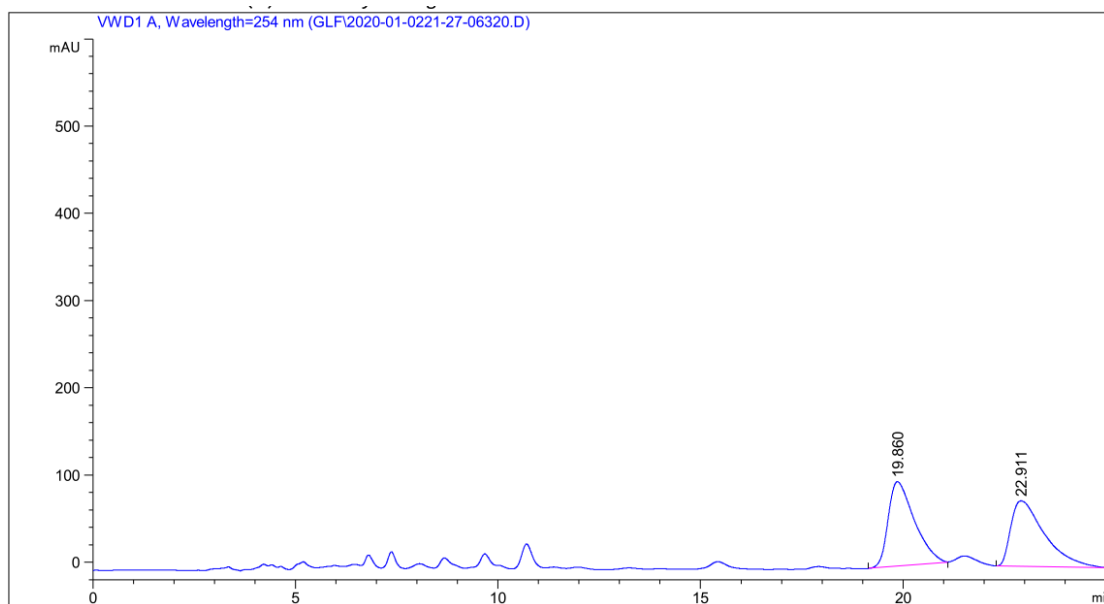

| Peak # | RetTime [min] | Type | Width [min] | Area [mAU*s] | Height [mAU] | Area %  |
|--------|---------------|------|-------------|--------------|--------------|---------|
| 1      | 19.860        | BB   | 0.6935      | 4343.51660   | 96.80798     | 49.7937 |
| 2      | 22.911        | BB   | 0.8339      | 4379.51025   | 75.14533     | 50.2063 |

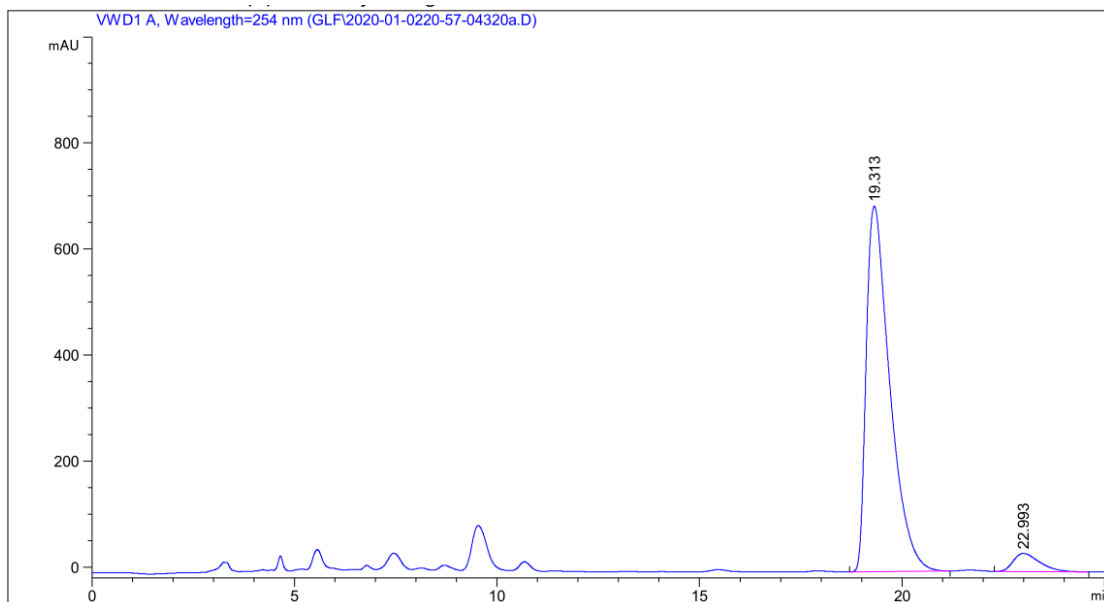

| Peak # | RetTime [min] | Type | Width [min] | Area [mAU*s] | Height [mAU] | Area %  |
|--------|---------------|------|-------------|--------------|--------------|---------|
| 1      | 19.313        | BBA  | 0.5975      | 2.79359e4    | 689.74207    | 94.6962 |
| 2      | 22.993        | BB   | 0.6978      | 1564.64941   | 34.25805     | 5.3038  |

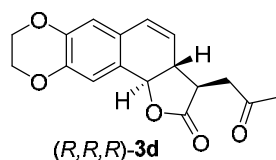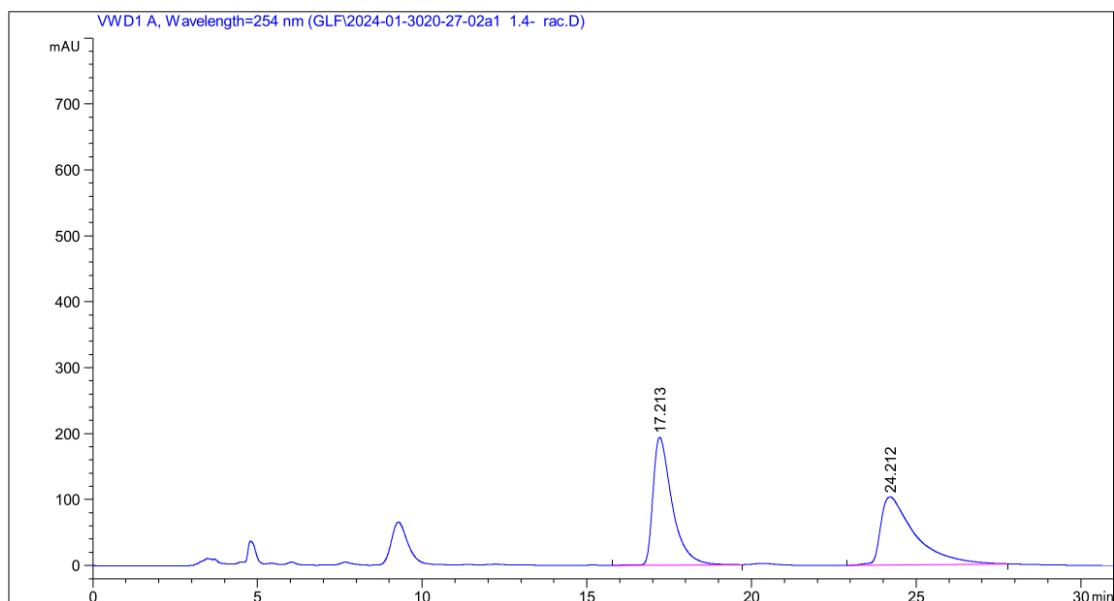

| Peak # | RetTime [min] | Type | Width [min] | Area [mAU*s] | Height [mAU] | Area %  |
|--------|---------------|------|-------------|--------------|--------------|---------|
| 1      | 17.213        | BB   | 0.6032      | 7816.28809   | 193.95479    | 51.2585 |
| 2      | 24.212        | BBA  | 1.0350      | 7432.47705   | 103.22648    | 48.7415 |

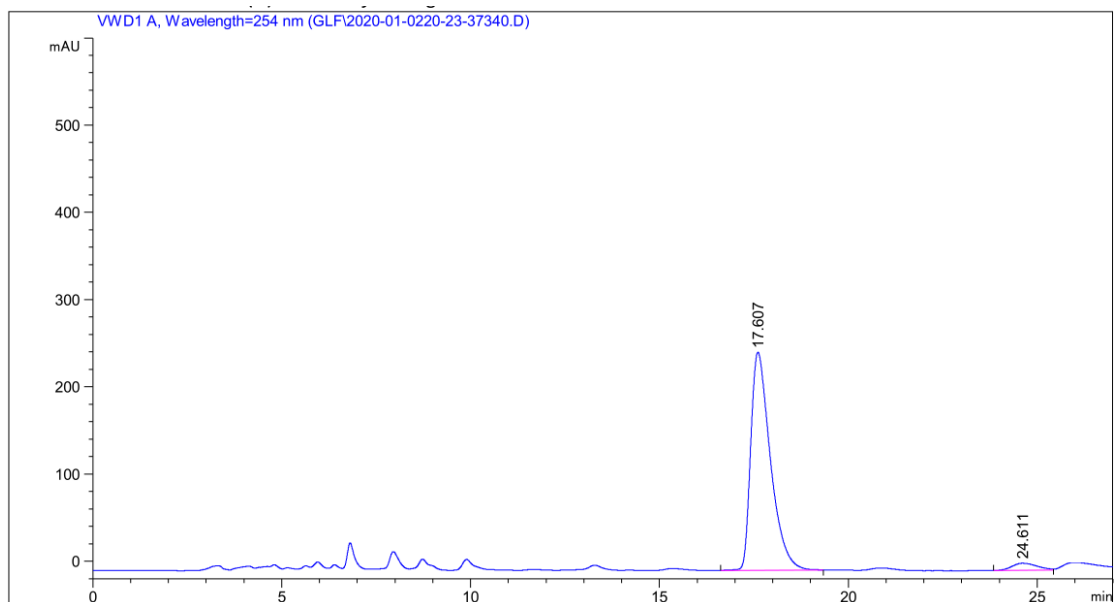

| Peak # | RetTime [min] | Type | Width [min] | Area [mAU*s] | Height [mAU] | Area %  |
|--------|---------------|------|-------------|--------------|--------------|---------|
| 1      | 17.607        | BB   | 0.5594      | 9029.73145   | 249.97353    | 96.1122 |
| 2      | 24.611        | BV   | 0.6993      | 365.26108    | 8.00548      | 3.8878  |

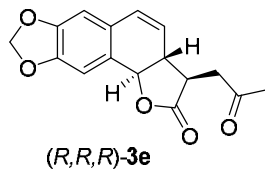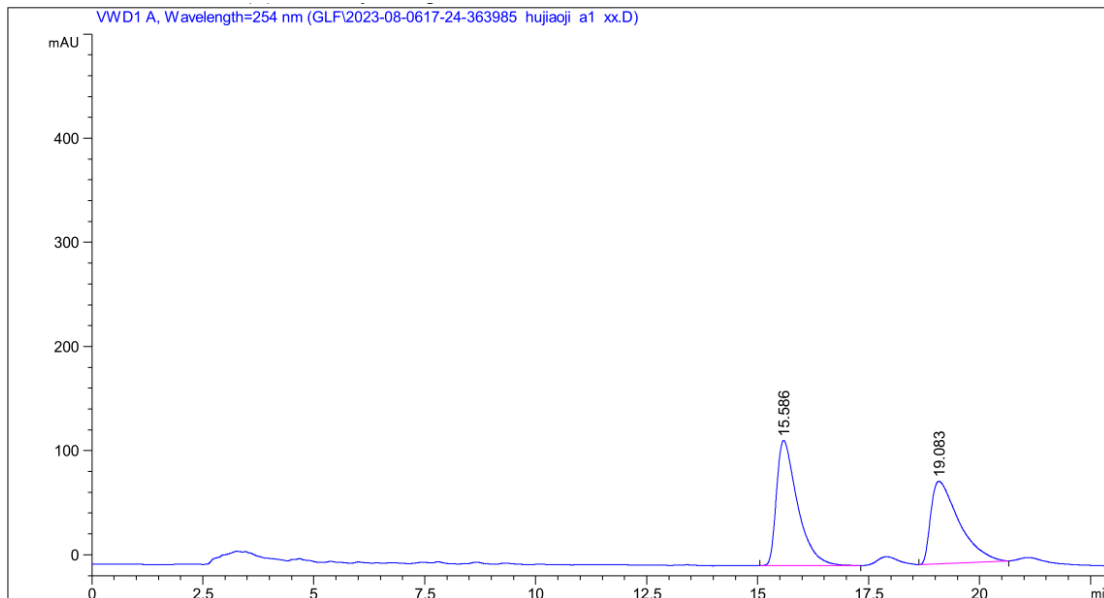

| Peak # | RetTime [min] | Type | Width [min] | Area [mAU*s] | Height [mAU] | Area %  |
|--------|---------------|------|-------------|--------------|--------------|---------|
| 1      | 15.586        | BB   | 0.4878      | 3952.66553   | 120.15372    | 51.0600 |
| 2      | 19.083        | BB   | 0.6407      | 3496.76392   | 79.25530     | 48.9400 |

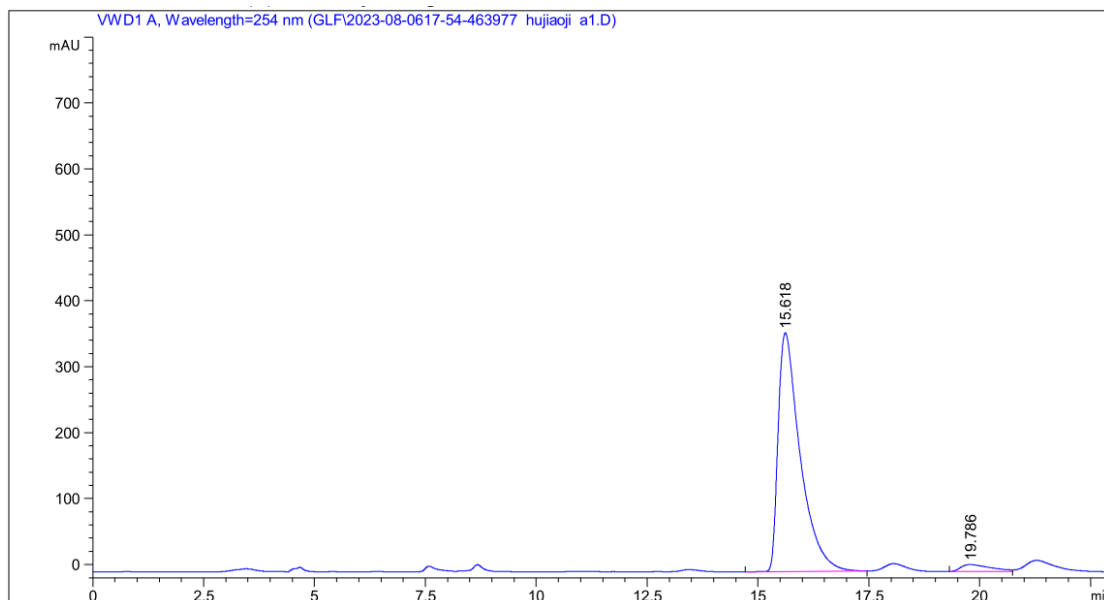

| Peak # | RetTime [min] | Type | Width [min] | Area [mAU*s] | Height [mAU] | Area %  |
|--------|---------------|------|-------------|--------------|--------------|---------|
| 1      | 15.618        | BB   | 0.5125      | 1.25179e4    | 361.92499    | 96.1034 |
| 2      | 19.786        | BV   | 0.6701      | 507.55212    | 10.72527     | 3.8966  |

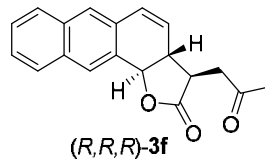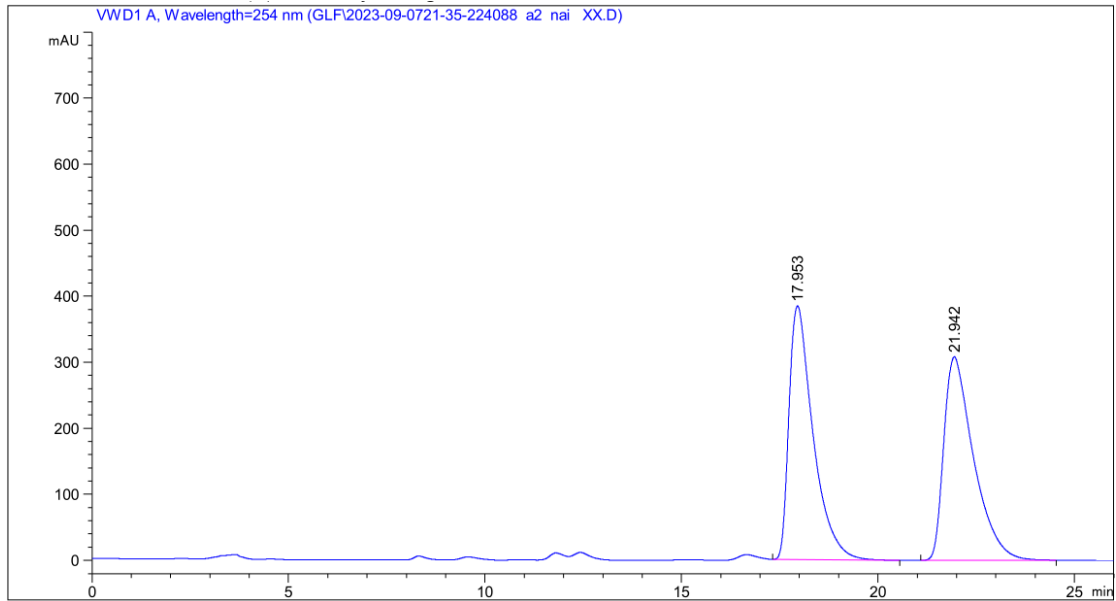

| Peak # | RetTime [min] | Type | Width [min] | Area [mAU*s] | Height [mAU] | Area %  |
|--------|---------------|------|-------------|--------------|--------------|---------|
| 1      | 17.953        | BB   | 0.6312      | 1.64008e4    | 384.06769    | 50.3130 |
| 2      | 21.942        | BB   | 0.7932      | 1.61967e4    | 308.13519    | 49.6870 |

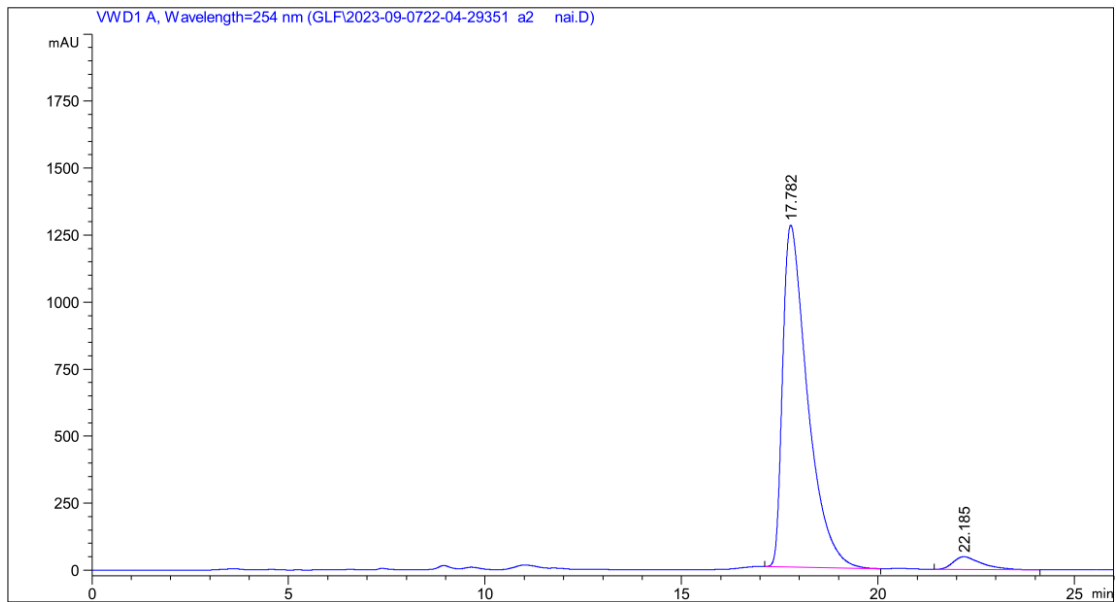

| Peak # | RetTime [min] | Type | Width [min] | Area [mAU*s] | Height [mAU] | Area %  |
|--------|---------------|------|-------------|--------------|--------------|---------|
| 1      | 17.782        | VB R | 0.6729      | 5.73954e4    | 1283.37646   | 95.9614 |
| 2      | 22.185        | BB   | 0.7391      | 2415.49951   | 47.51360     | 4.0386  |

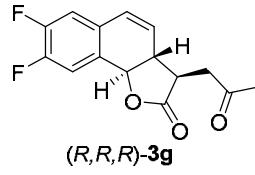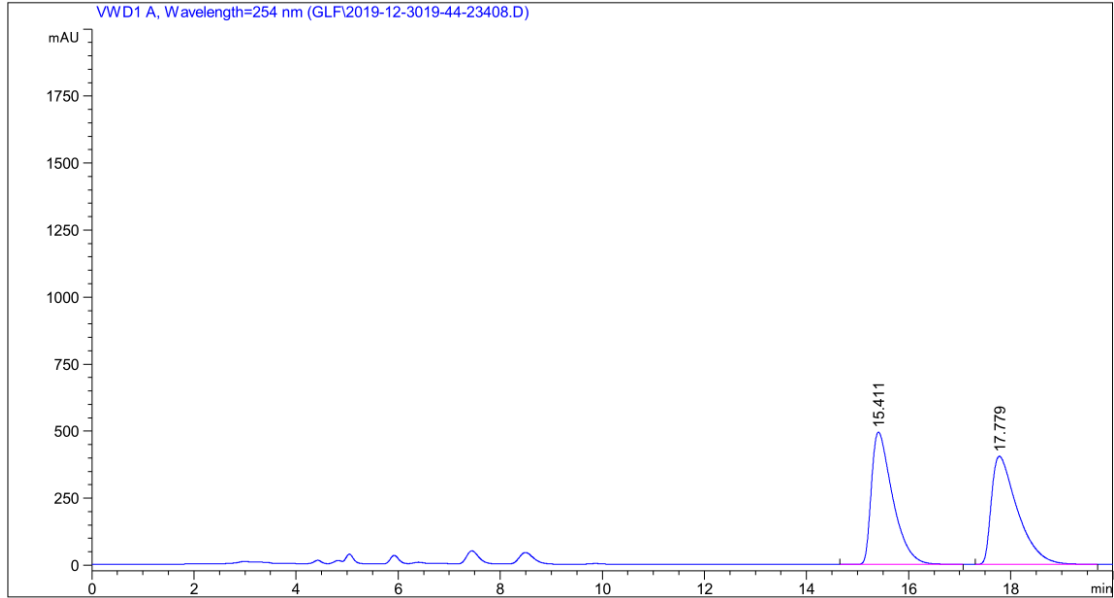

| Peak # | RetTime [min] | Type | Width [min] | Area [mAU*s] | Height [mAU] | Area %  |
|--------|---------------|------|-------------|--------------|--------------|---------|
| 1      | 15.411        | VB R | 0.4312      | 1.42697e4    | 493.71988    | 49.9553 |
| 2      | 17.779        | BB   | 0.5286      | 1.42953e4    | 403.19778    | 50.0447 |

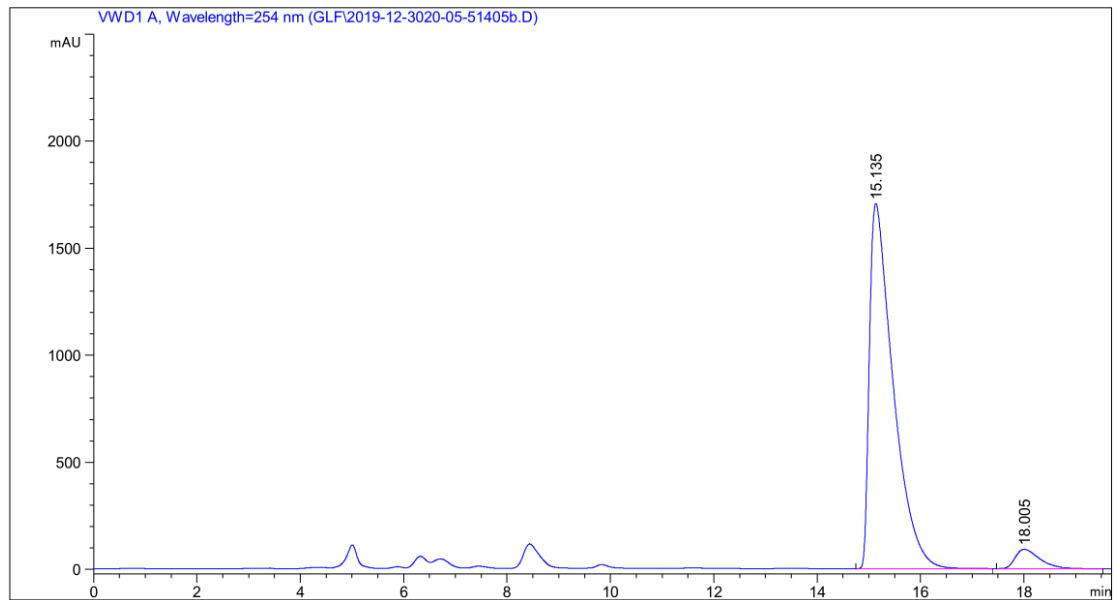

| Peak # | RetTime [min] | Type | Width [min] | Area [mAU*s] | Height [mAU] | Area %  |
|--------|---------------|------|-------------|--------------|--------------|---------|
| 1      | 15.135        | BB   | 0.4624      | 5.42620e4    | 1704.73267   | 94.8186 |
| 2      | 18.005        | BB   | 0.5008      | 2965.13916   | 90.12718     | 5.1814  |

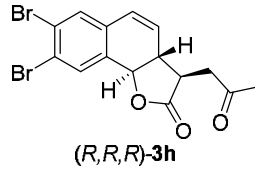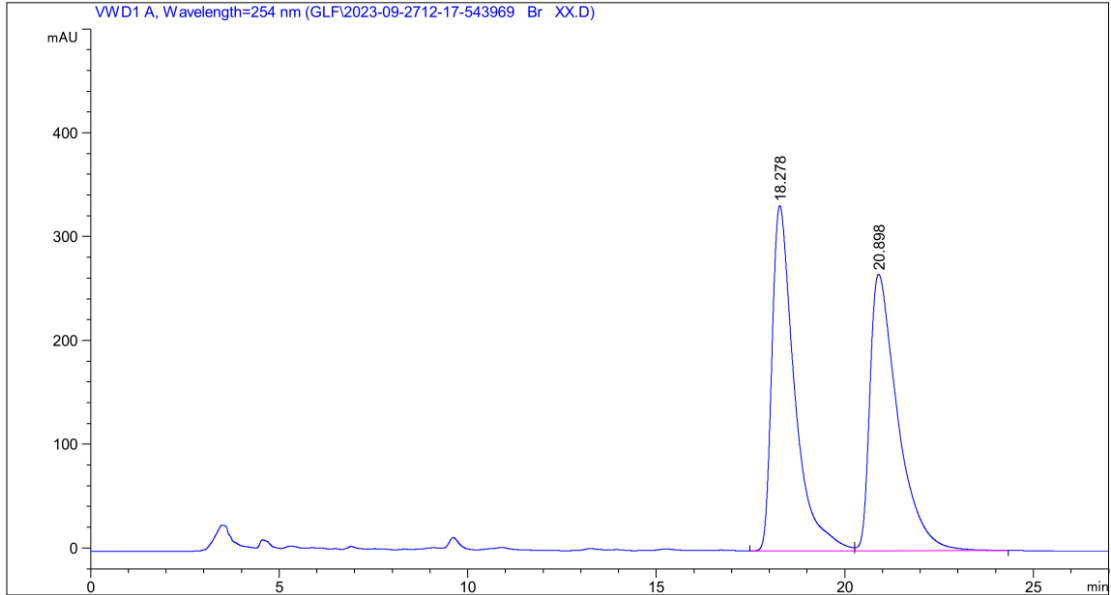

| Peak # | RetTime [min] | Type | Width [min] | Area [mAU*s] | Height [mAU] | Area %  |
|--------|---------------|------|-------------|--------------|--------------|---------|
| 1      | 18.278        | BV   | 0.6187      | 1.38761e4    | 332.63184    | 50.5339 |
| 2      | 20.898        | VB   | 0.7451      | 1.35828e4    | 266.28275    | 49.4661 |

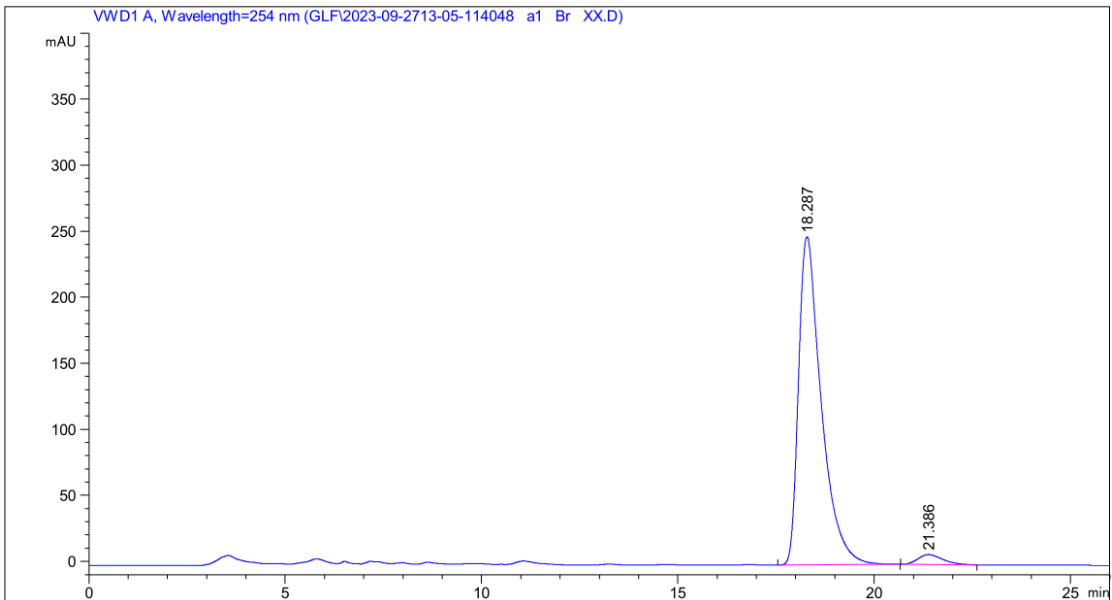

| Peak # | RetTime [min] | Type | Width [min] | Area [mAU*s] | Height [mAU] | Area %  |
|--------|---------------|------|-------------|--------------|--------------|---------|
| 1      | 18.287        | BB   | 0.5891      | 1.00078e4    | 248.37762    | 96.8121 |
| 2      | 21.386        | BB   | 0.6250      | 329.54251    | 7.58247      | 3.1879  |

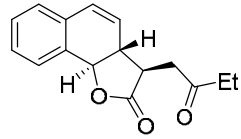

(*R,R,R*)-3i

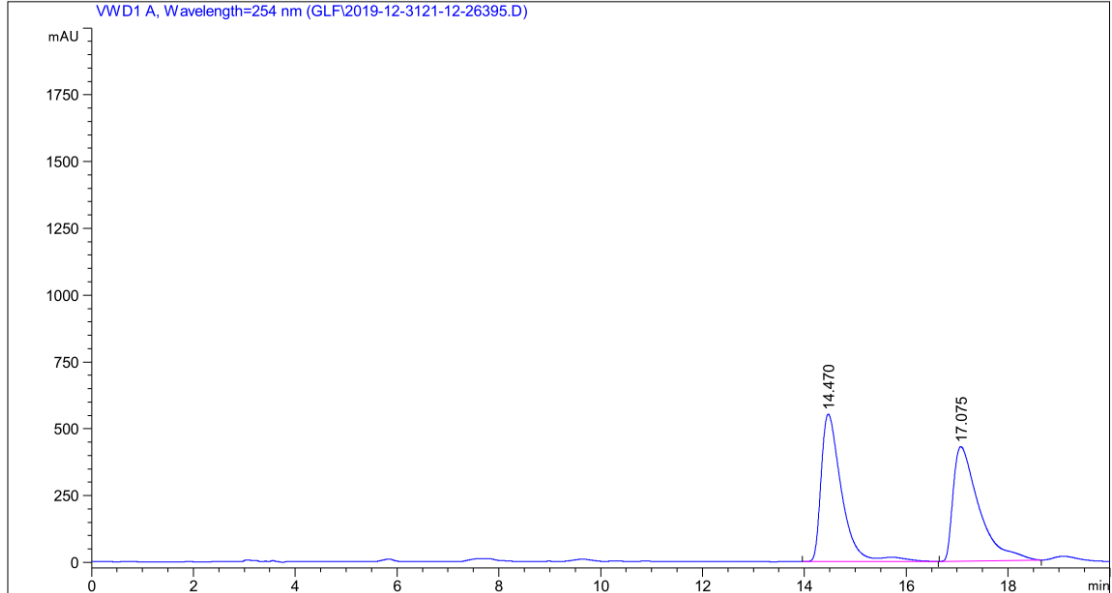

| Peak # | RetTime [min] | Type | Width [min] | Area [mAU*s] | Height [mAU] | Area %  |
|--------|---------------|------|-------------|--------------|--------------|---------|
| 1      | 14.470        | BV R | 0.4075      | 1.54567e4    | 551.86664    | 50.6783 |
| 2      | 17.075        | BBA  | 0.5219      | 1.50430e4    | 428.14230    | 49.3217 |

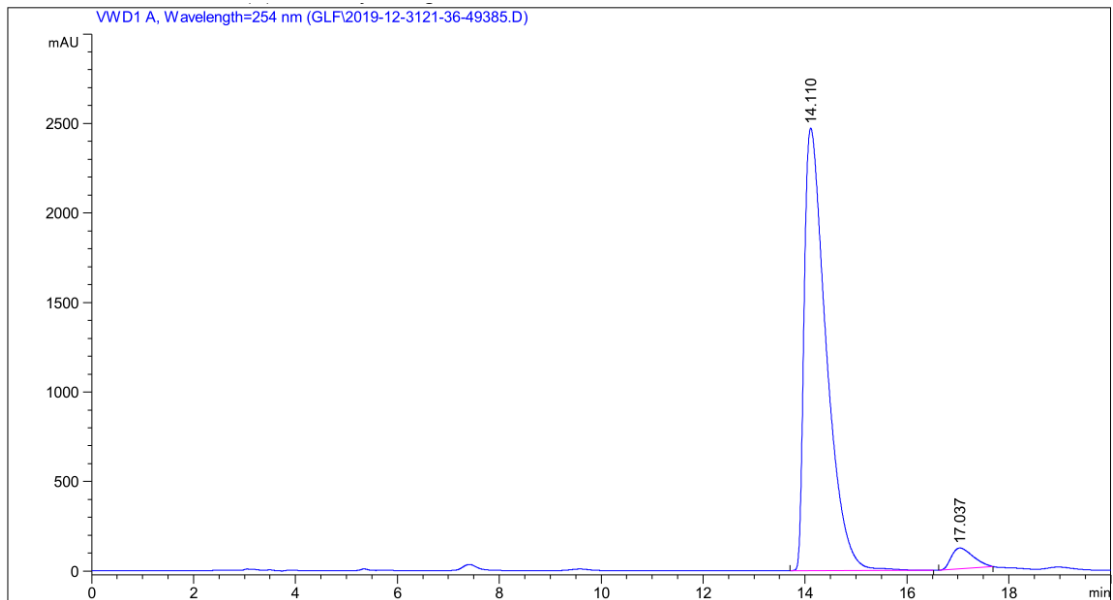

| Peak # | RetTime [min] | Type | Width [min] | Area [mAU*s] | Height [mAU] | Area %  |
|--------|---------------|------|-------------|--------------|--------------|---------|
| 1      | 14.110        | BB   | 0.4503      | 7.39885e4    | 2470.89868   | 95.5700 |
| 2      | 17.037        | BBA  | 0.4653      | 3429.59985   | 116.22460    | 4.4300  |

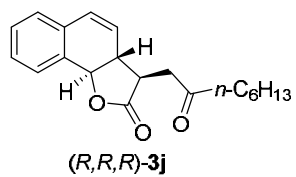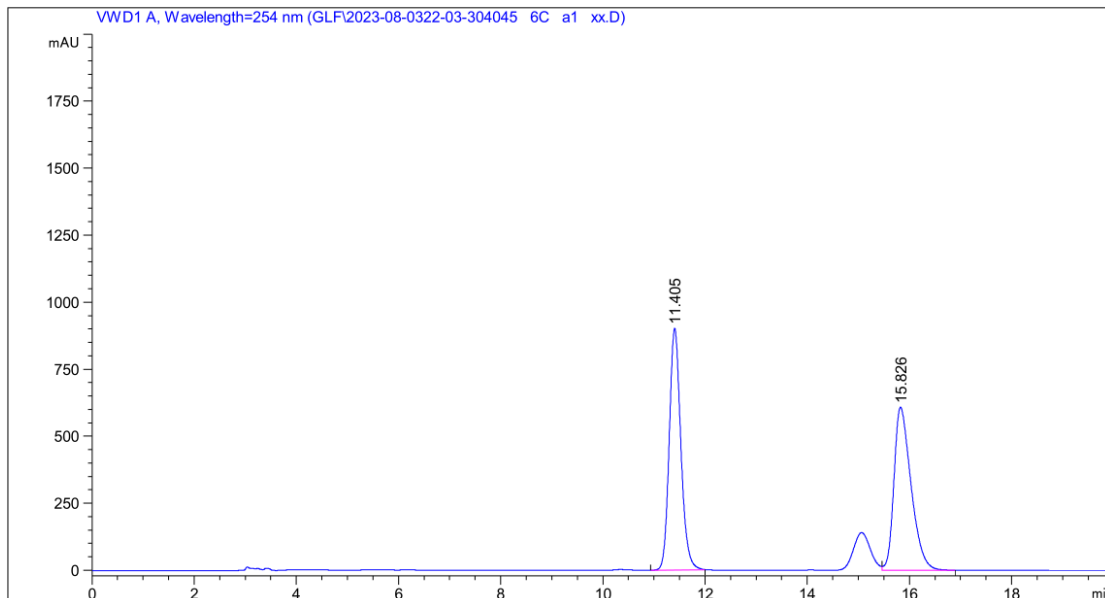

| Peak # | RetTime [min] | Type | Width [min] | Area [mAU*s] | Height [mAU] | Area %  |
|--------|---------------|------|-------------|--------------|--------------|---------|
| 1      | 11.405        | BBA  | 0.2416      | 1.41894e4    | 901.59021    | 50.0913 |
| 2      | 15.826        | VB   | 0.3563      | 1.41377e4    | 608.05292    | 49.9087 |

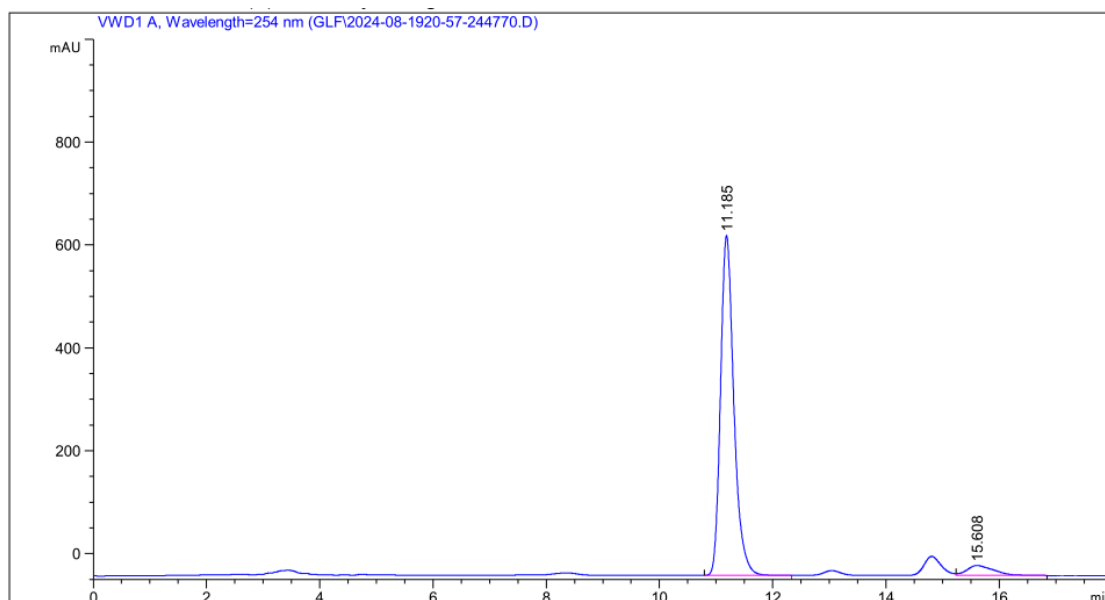

| Peak # | RetTime [min] | Type | Width [min] | Area [mAU*s] | Height [mAU] | Area %  |
|--------|---------------|------|-------------|--------------|--------------|---------|
| 1      | 11.185        | BB   | 0.2506      | 1.07907e4    | 660.61005    | 94.3161 |
| 2      | 15.608        | VB   | 0.4738      | 650.30042    | 19.66288     | 5.6839  |

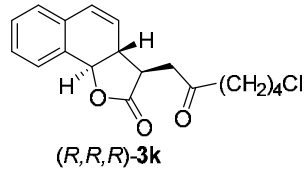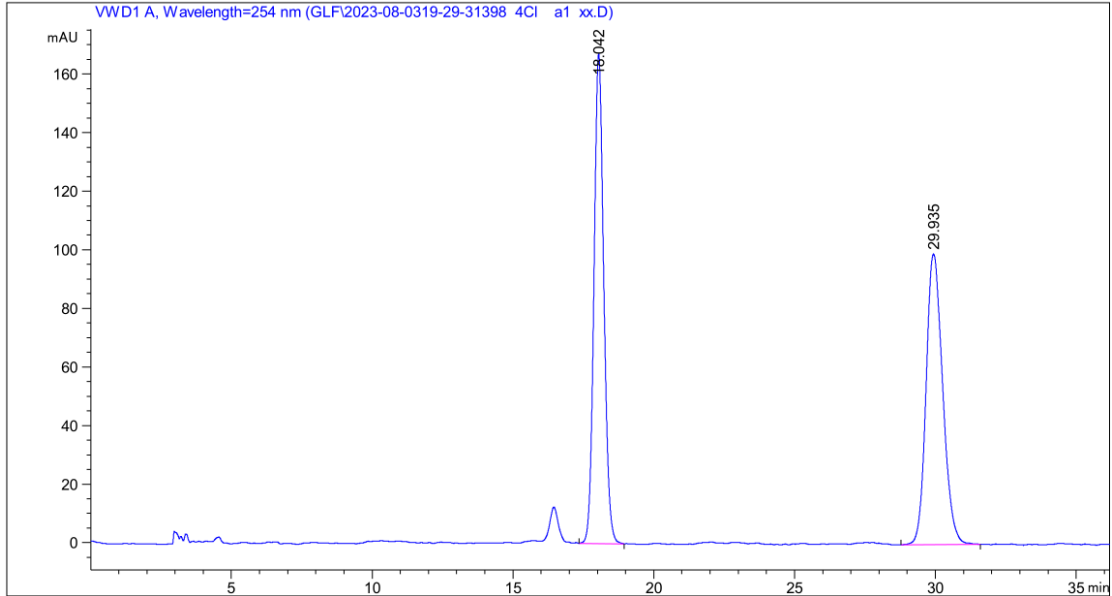

| Peak # | RetTime [min] | Type | Width [min] | Area [mAU*s] | Height [mAU] | Area %  |
|--------|---------------|------|-------------|--------------|--------------|---------|
| 1      | 18.042        | BB   | 0.3675      | 4035.97314   | 167.24492    | 49.7586 |
| 2      | 29.935        | BB   | 0.6372      | 4075.12988   | 99.21137     | 50.2414 |

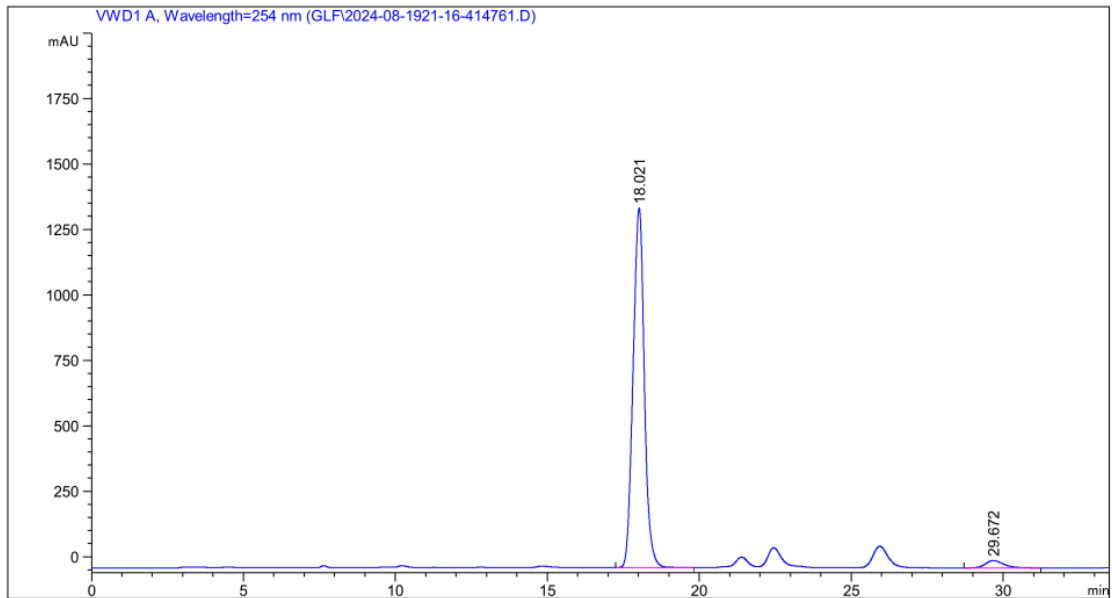

| Peak # | RetTime [min] | Type | Width [min] | Area [mAU*s] | Height [mAU] | Area %  |
|--------|---------------|------|-------------|--------------|--------------|---------|
| 1      | 18.021        | BB   | 0.3977      | 3.53767e4    | 1372.37109   | 96.8333 |
| 2      | 29.672        | BB   | 0.6123      | 1156.91223   | 28.22020     | 3.1667  |

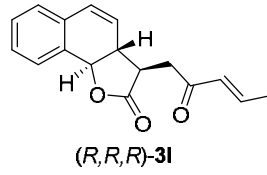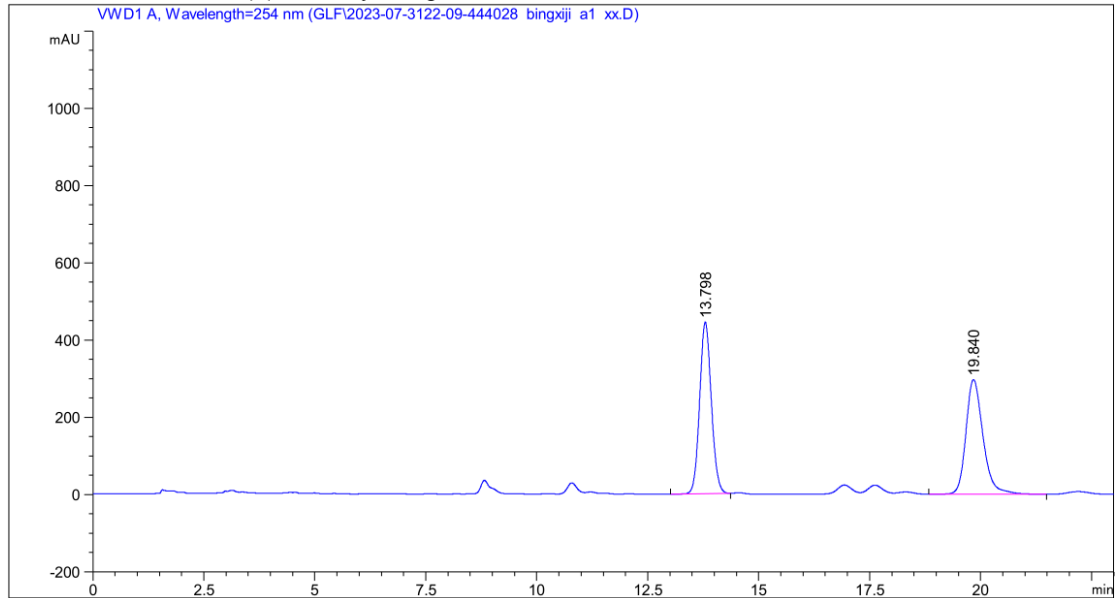

| Peak # | RetTime [min] | Type | Width [min] | Area [mAU*s] | Height [mAU] | Area %  |
|--------|---------------|------|-------------|--------------|--------------|---------|
| 1      | 13.798        | BB   | 0.2825      | 8131.71582   | 444.39746    | 50.5505 |
| 2      | 19.840        | BB   | 0.4055      | 7954.60645   | 296.96661    | 49.4495 |

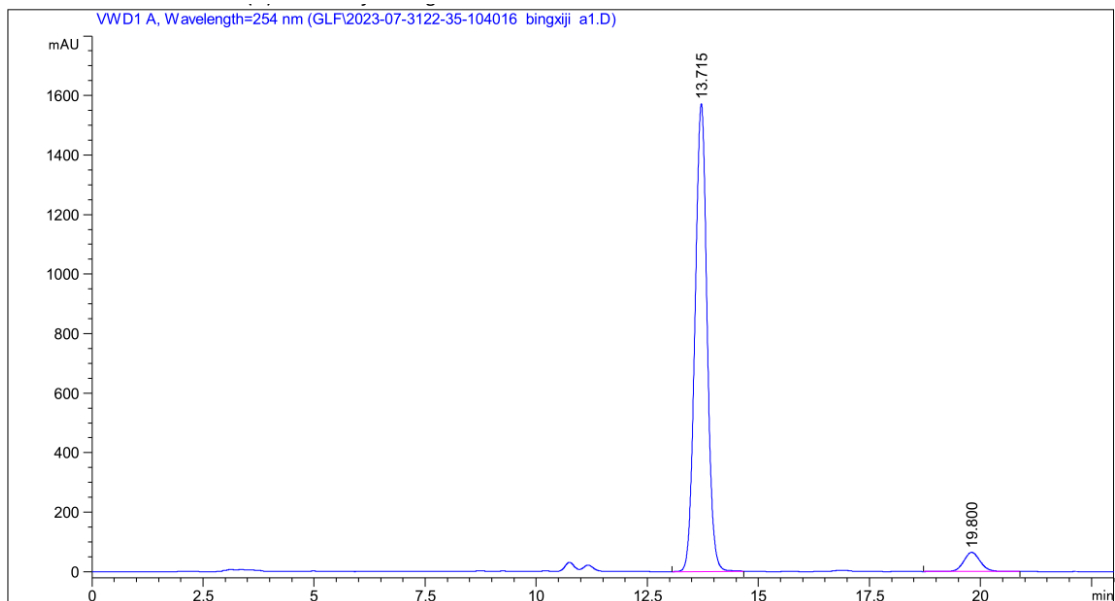

| Peak # | RetTime [min] | Type | Width [min] | Area [mAU*s] | Height [mAU] | Area %  |
|--------|---------------|------|-------------|--------------|--------------|---------|
| 1      | 13.715        | BBA  | 0.2941      | 2.96646e4    | 1572.15454   | 94.6519 |
| 2      | 19.800        | BB   | 0.3986      | 1676.13782   | 64.61974     | 5.3481  |

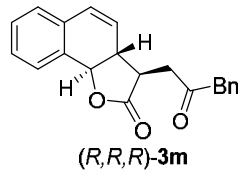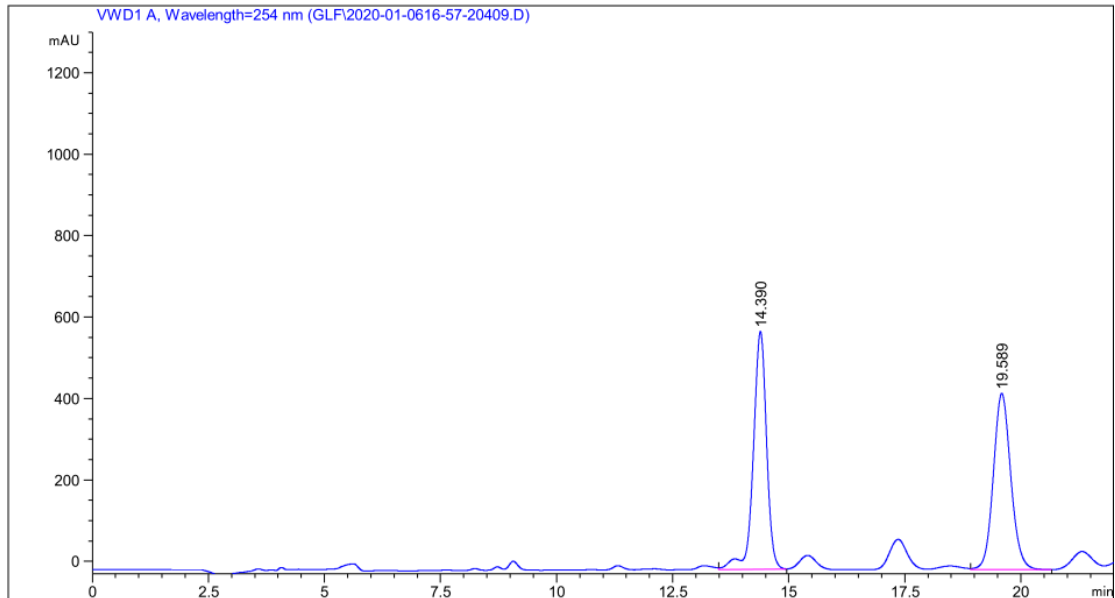

| Peak # | RetTime [min] | Type | Width [min] | Area [mAU*s] | Height [mAU] | Area %  |
|--------|---------------|------|-------------|--------------|--------------|---------|
| 1      | 14.390        | FM   | 0.3318      | 1.16168e4    | 583.56964    | 50.4822 |
| 2      | 19.589        | VB   | 0.4061      | 1.13949e4    | 432.90631    | 49.5178 |

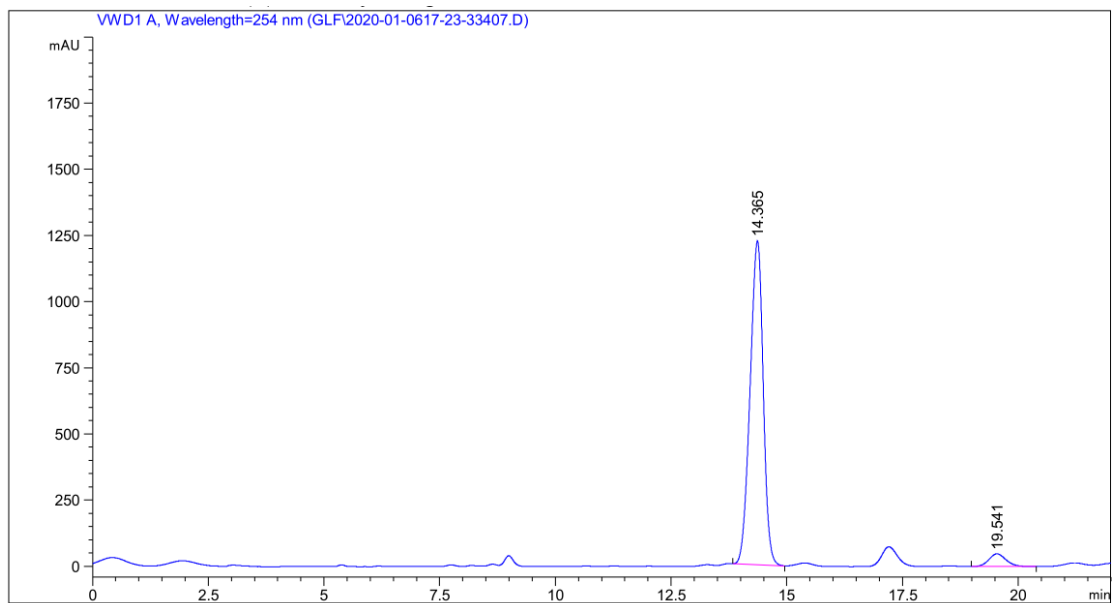

| Peak # | RetTime [min] | Type | Width [min] | Area [mAU*s] | Height [mAU] | Area %  |
|--------|---------------|------|-------------|--------------|--------------|---------|
| 1      | 14.365        | BB   | 0.3055      | 2.40758e4    | 1223.87354   | 95.0918 |
| 2      | 19.541        | BB   | 0.3965      | 1242.67444   | 48.09024     | 4.9082  |

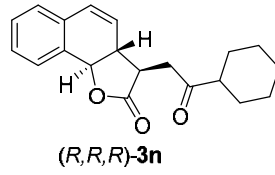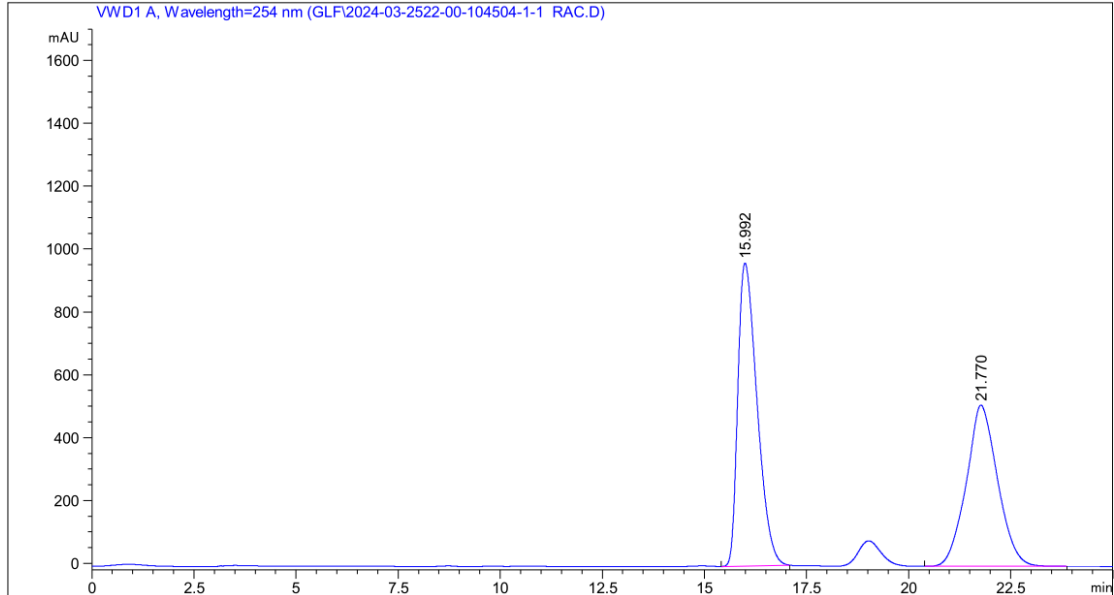

| Peak # | RetTime [min] | Type | Width [min] | Area [mAU*s] | Height [mAU] | Area %  |
|--------|---------------|------|-------------|--------------|--------------|---------|
| 1      | 15.992        | BBA  | 0.5081      | 3.14871e4    | 963.89435    | 51.5244 |
| 2      | 21.770        | BB   | 0.7876      | 2.73404e4    | 513.15039    | 49.4756 |

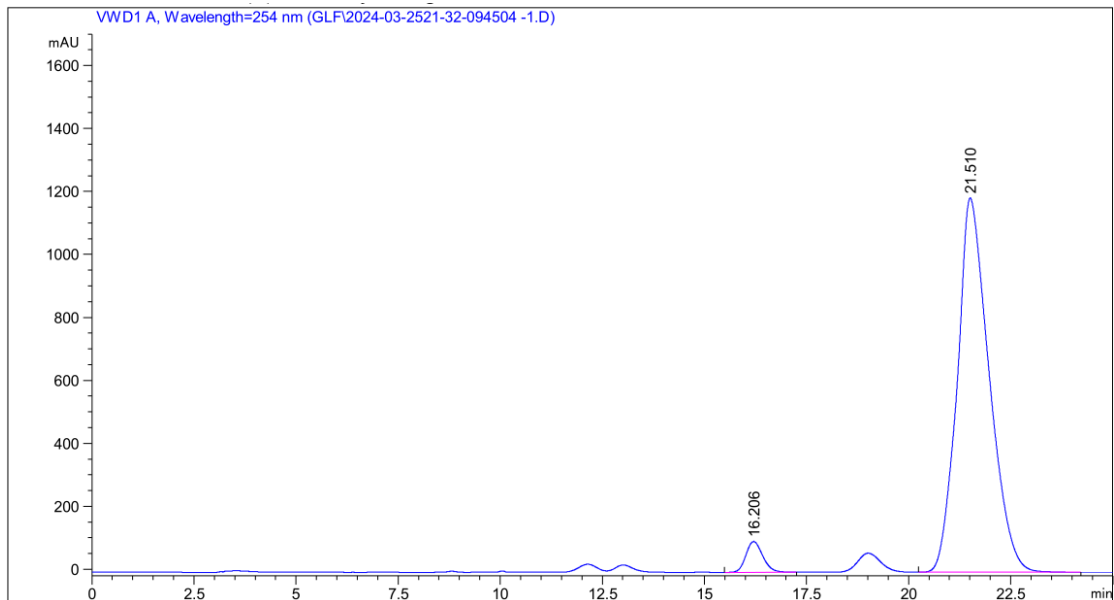

| Peak # | RetTime [min] | Type | Width [min] | Area [mAU*s] | Height [mAU] | Area %  |
|--------|---------------|------|-------------|--------------|--------------|---------|
| 1      | 16.206        | BB   | 0.4437      | 2793.60449   | 97.67126     | 4.1584  |
| 2      | 21.510        | BB   | 0.7918      | 6.43867e4    | 1188.94397   | 95.8416 |

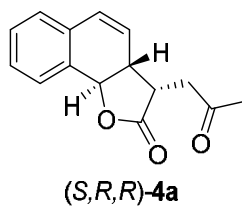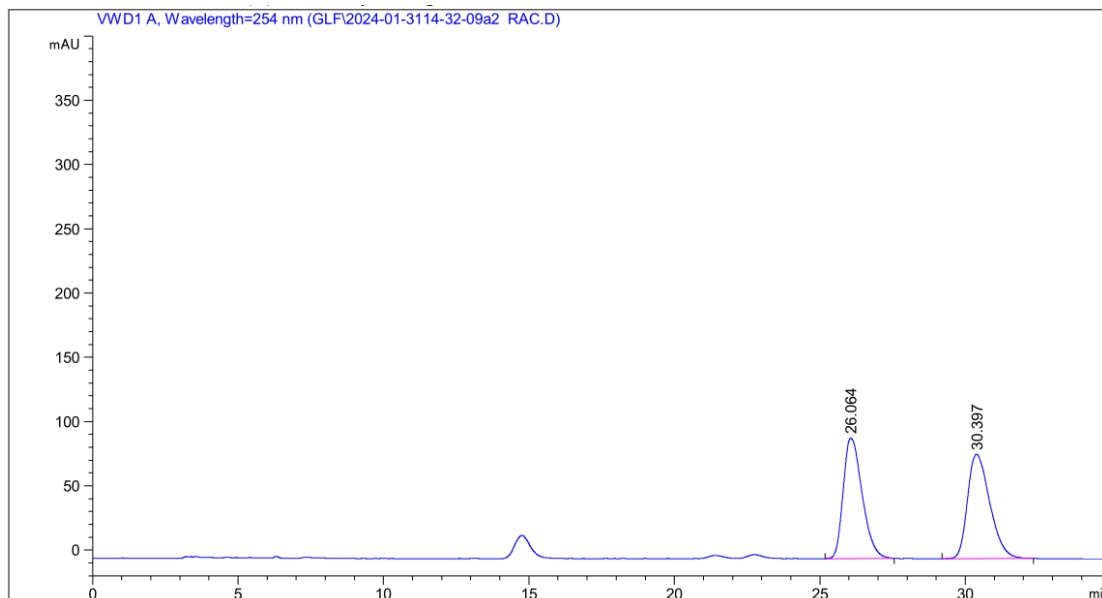

| Peak # | RetTime [min] | Type | Width [min] | Area [mAU*s] | Height [mAU] | Area %  |
|--------|---------------|------|-------------|--------------|--------------|---------|
| 1      | 26.064        | BB   | 0.6815      | 4242.12207   | 93.64829     | 49.4446 |
| 2      | 30.397        | BV R | 0.8131      | 4337.42383   | 81.46808     | 50.5554 |

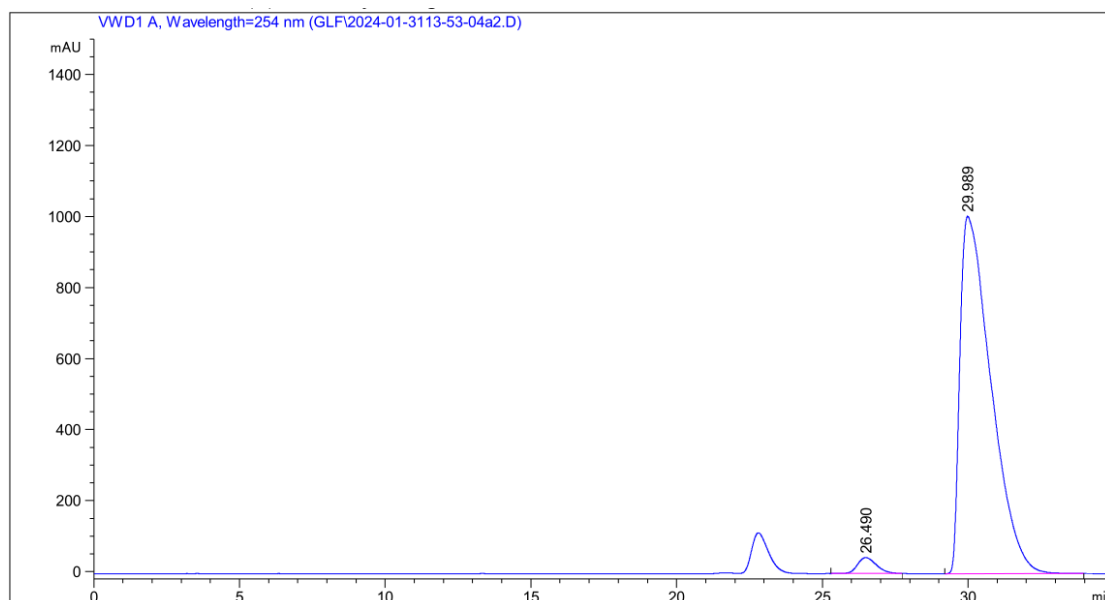

| Peak # | RetTime [min] | Type | Width [min] | Area [mAU*s] | Height [mAU] | Area %  |
|--------|---------------|------|-------------|--------------|--------------|---------|
| 1      | 26.490        | BB   | 0.6882      | 2031.70007   | 44.87866     | 2.6608  |
| 2      | 29.989        | BB   | 1.0817      | 7.43253e4    | 1006.30078   | 97.3392 |

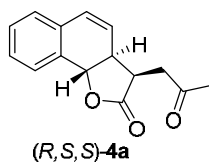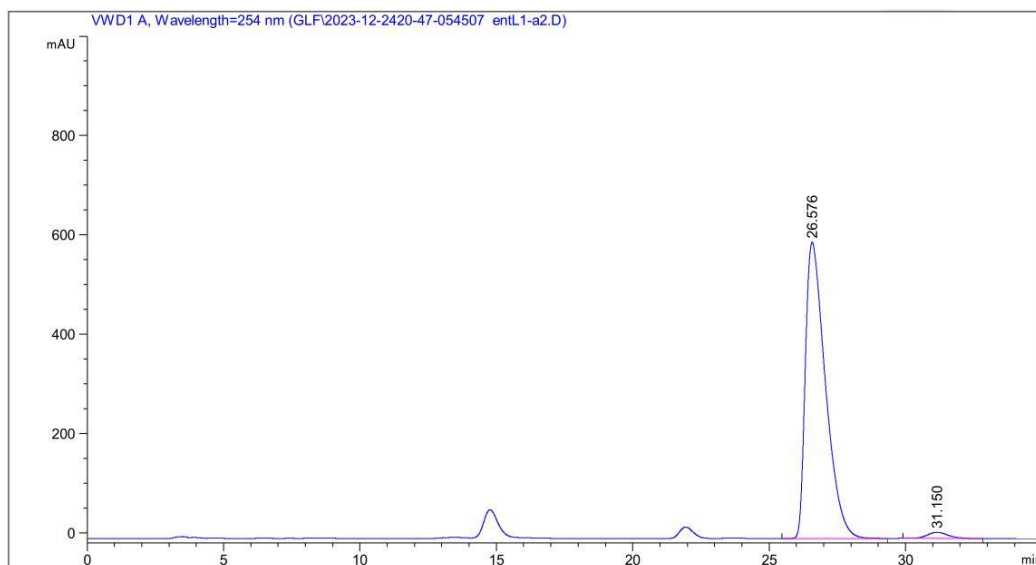

| Peak # | RetTime [min] | Type | Width [min] | Area [mAU*s] | Height [mAU] | Area %  |
|--------|---------------|------|-------------|--------------|--------------|---------|
| 1      | 26.576        | BB   | 0.7870      | 3.04363e4    | 596.79474    | 97.8642 |
| 2      | 31.150        | BB   | 0.8203      | 664.23163    | 12.33436     | 2.1358  |

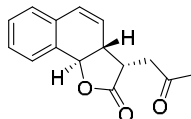

Gram-scale reaction of  
**(S,R,R)-4a**

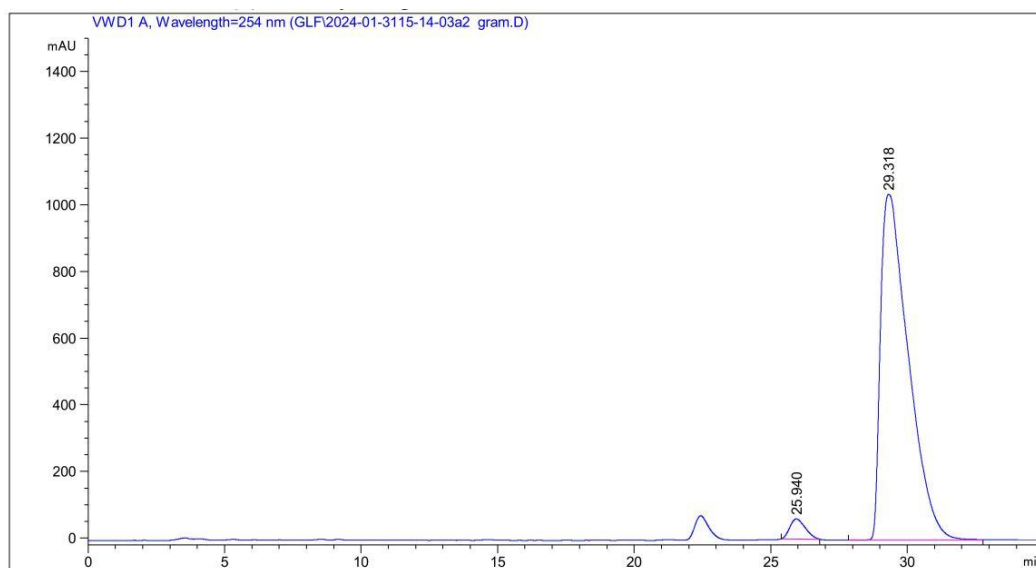

| Peak # | RetTime [min] | Type | Width [min] | Area [mAU*s] | Height [mAU] | Area %  |
|--------|---------------|------|-------------|--------------|--------------|---------|
| 1      | 25.940        | HBA  | 0.6242      | 2354.52246   | 60.33988     | 3.1016  |
| 2      | 29.318        | HH   | 1.0055      | 7.35591e4    | 1037.08557   | 96.8984 |

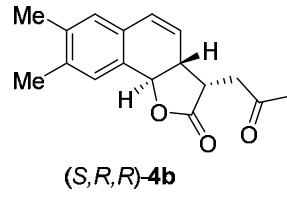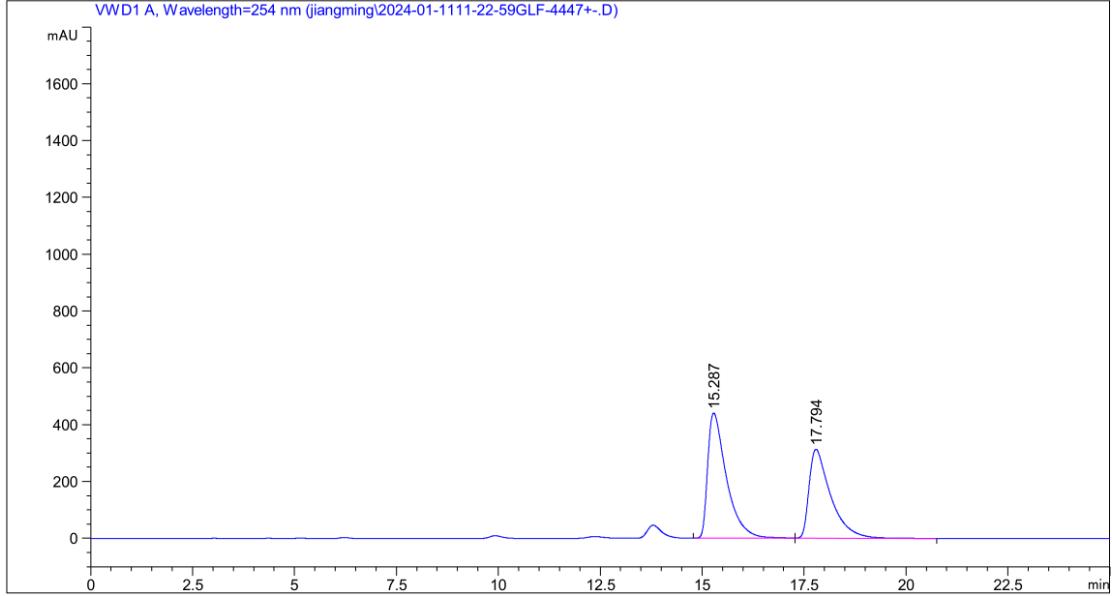

| Peak # | RetTime [min] | Type | Width [min] | Area [mAU*s] | Height [mAU] | Area %  |
|--------|---------------|------|-------------|--------------|--------------|---------|
| 1      | 15.287        | BV   | 0.4773      | 1.41491e4    | 441.03333    | 52.5846 |
| 2      | 17.794        | VB   | 0.5359      | 1.15837e4    | 313.66385    | 47.4154 |

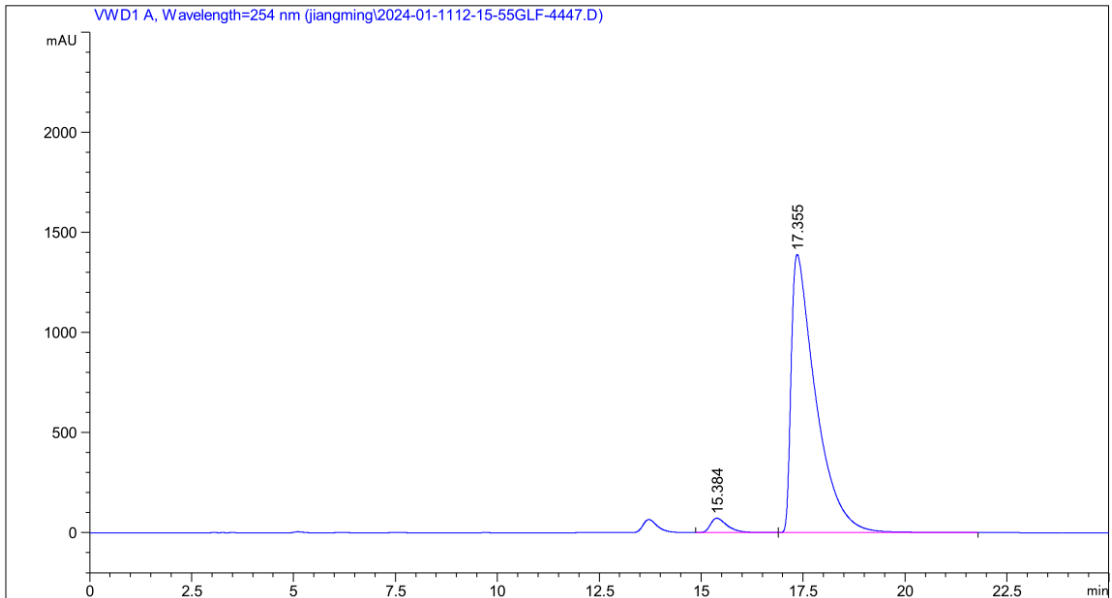

| Peak # | RetTime [min] | Type | Width [min] | Area [mAU*s] | Height [mAU] | Area %  |
|--------|---------------|------|-------------|--------------|--------------|---------|
| 1      | 15.384        | BB   | 0.4353      | 2104.88184   | 72.37424     | 3.4857  |
| 2      | 17.355        | BB   | 0.6065      | 5.82814e4    | 1389.19360   | 96.5143 |

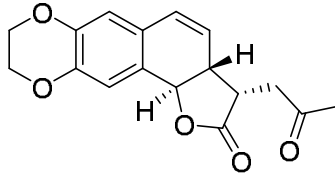

(S,R,R)-4d

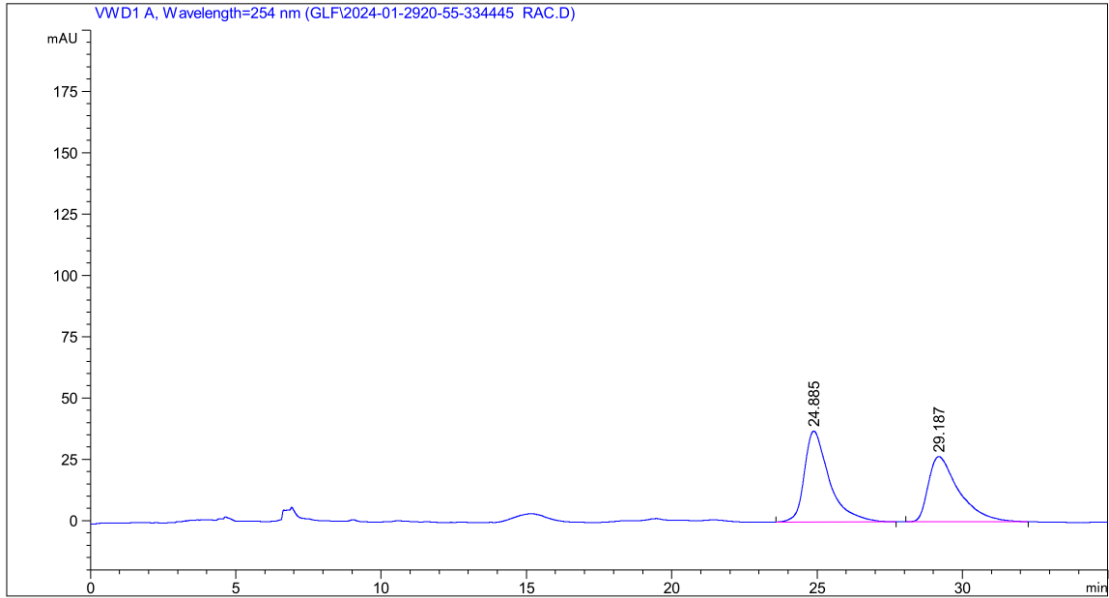

| Peak # | RetTime [min] | Type | Width [min] | Area [mAU*s] | Height [mAU] | Area %  |
|--------|---------------|------|-------------|--------------|--------------|---------|
| 1      | 24.885        | BB   | 0.8780      | 2210.00024   | 36.99292     | 50.2801 |
| 2      | 29.187        | BB   | 1.0680      | 1937.89343   | 26.66140     | 49.7199 |

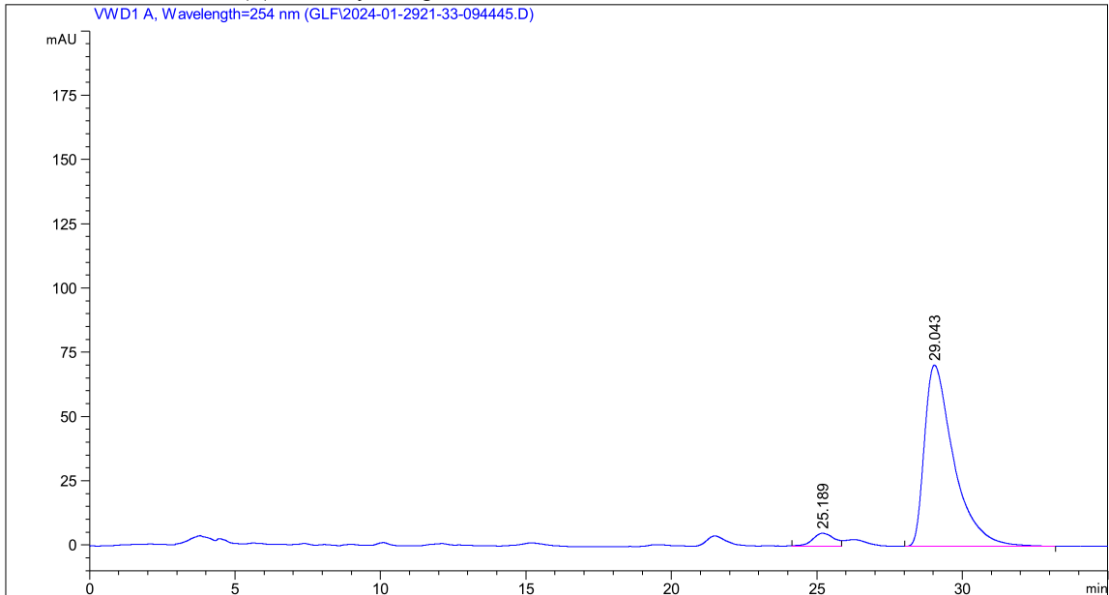

| Peak # | RetTime [min] | Type | Width [min] | Area [mAU*s] | Height [mAU] | Area %  |
|--------|---------------|------|-------------|--------------|--------------|---------|
| 1      | 25.189        | BB   | 0.5718      | 149.67645    | 3.73314      | 2.9465  |
| 2      | 29.043        | BB   | 1.0463      | 4930.14111   | 70.54834     | 97.0535 |

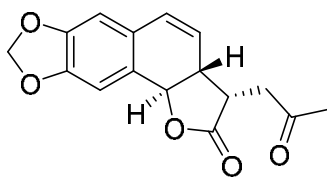

(S,R,R)-4e

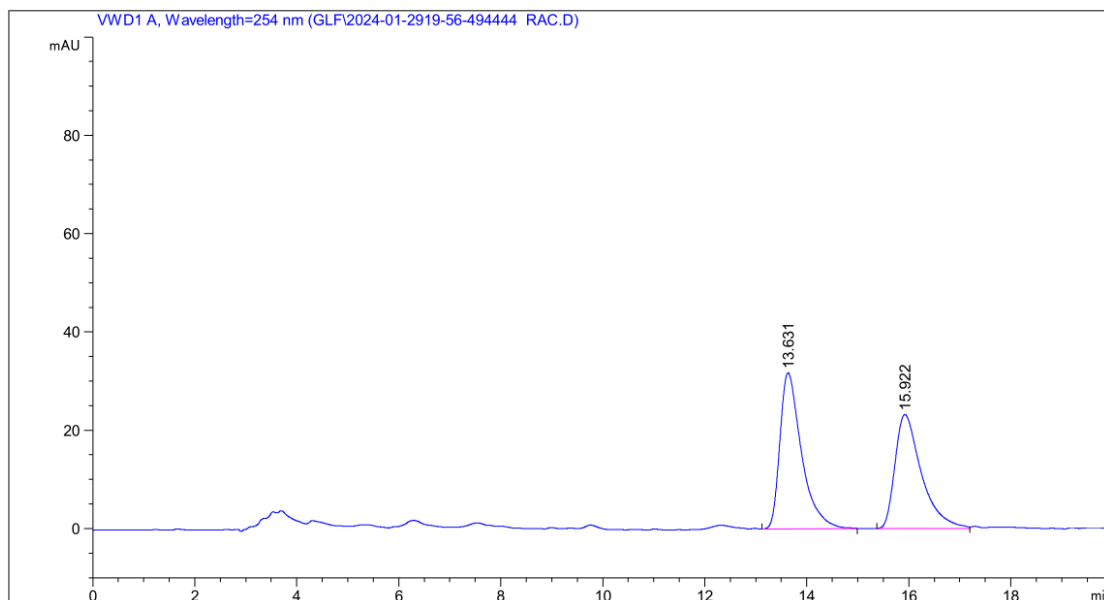

| Peak # | RetTime [min] | Type | Width [min] | Area [mAU*s] | Height [mAU] | Area %  |
|--------|---------------|------|-------------|--------------|--------------|---------|
| 1      | 13.631        | BBA  | 0.4408      | 938.40216    | 31.74929     | 50.9179 |
| 2      | 15.922        | HH   | 0.5363      | 834.91632    | 23.17597     | 49.0821 |

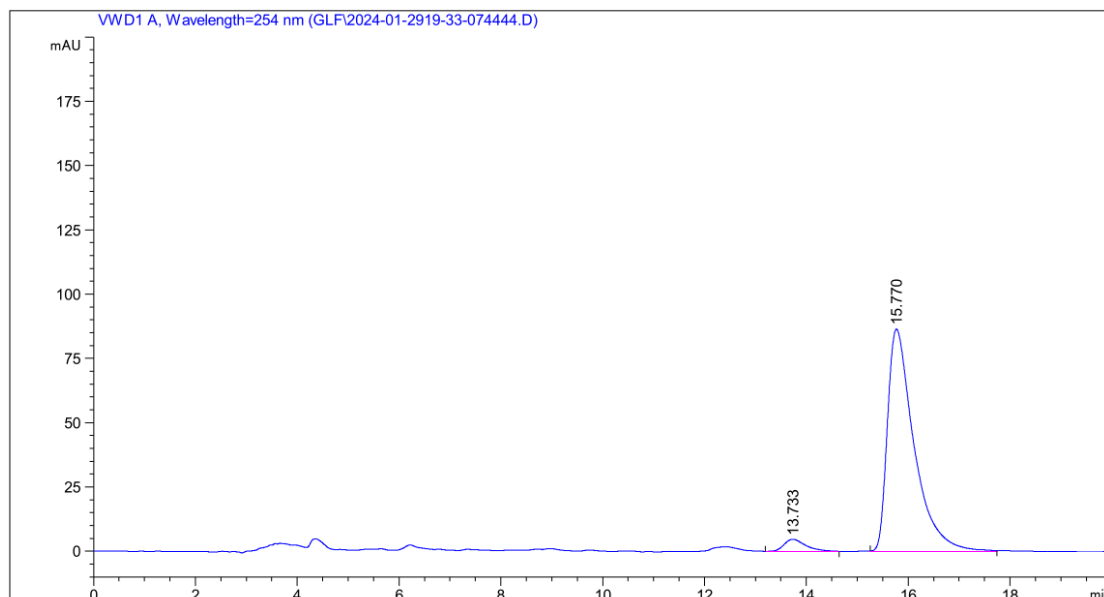

| Peak # | RetTime [min] | Type | Width [min] | Area [mAU*s] | Height [mAU] | Area %  |
|--------|---------------|------|-------------|--------------|--------------|---------|
| 1      | 13.733        | BB   | 0.4397      | 137.74564    | 4.67572      | 4.2044  |
| 2      | 15.770        | HH   | 0.5396      | 3138.47998   | 86.43583     | 95.7956 |

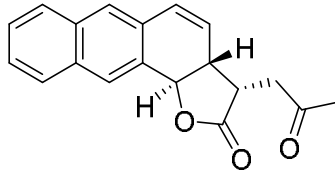

(S,R,R)-4f

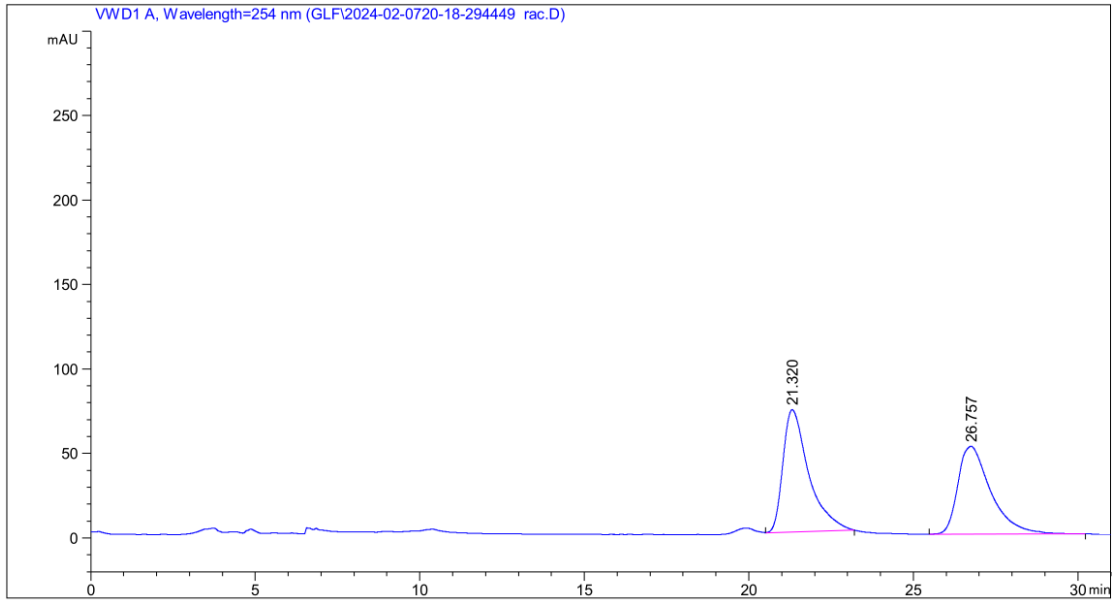

| Peak # | RetTime [min] | Type | Width [min] | Area [mAU*s] | Height [mAU] | Area %  |
|--------|---------------|------|-------------|--------------|--------------|---------|
| 1      | 21.320        | BBA  | 0.8109      | 3935.29443   | 72.31099     | 50.0895 |
| 2      | 26.757        | BB   | 0.9946      | 3619.57886   | 51.96527     | 49.9105 |

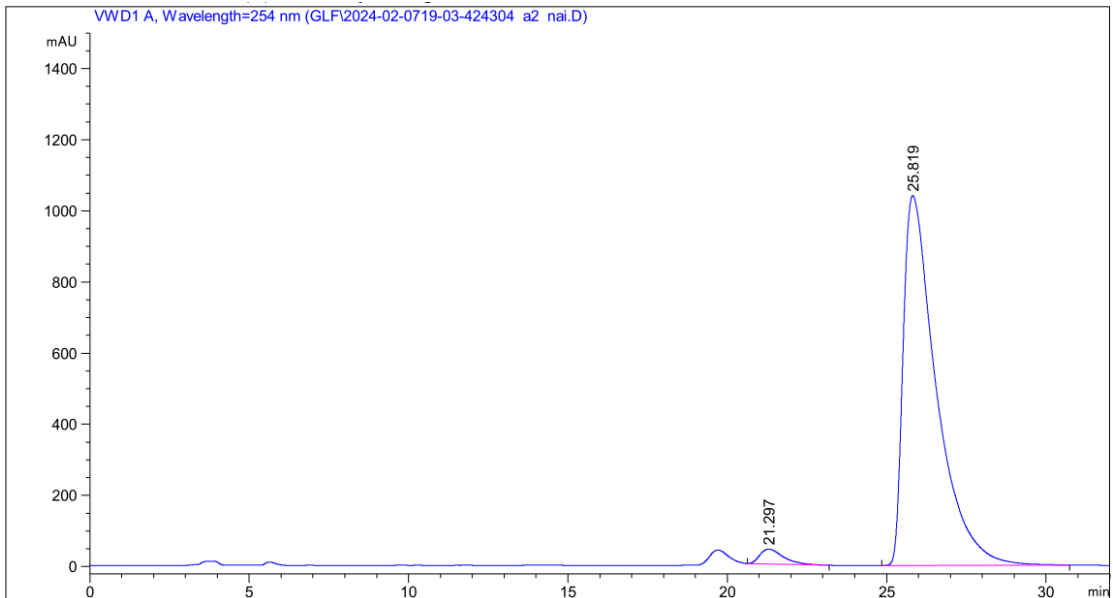

| Peak # | RetTime [min] | Type | Width [min] | Area [mAU*s] | Height [mAU] | Area %  |
|--------|---------------|------|-------------|--------------|--------------|---------|
| 1      | 21.297        | BBA  | 0.7888      | 2127.41431   | 41.72719     | 2.7676  |
| 2      | 25.819        | BB   | 1.0520      | 7.47421e4    | 1039.36316   | 97.2324 |

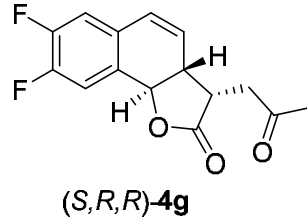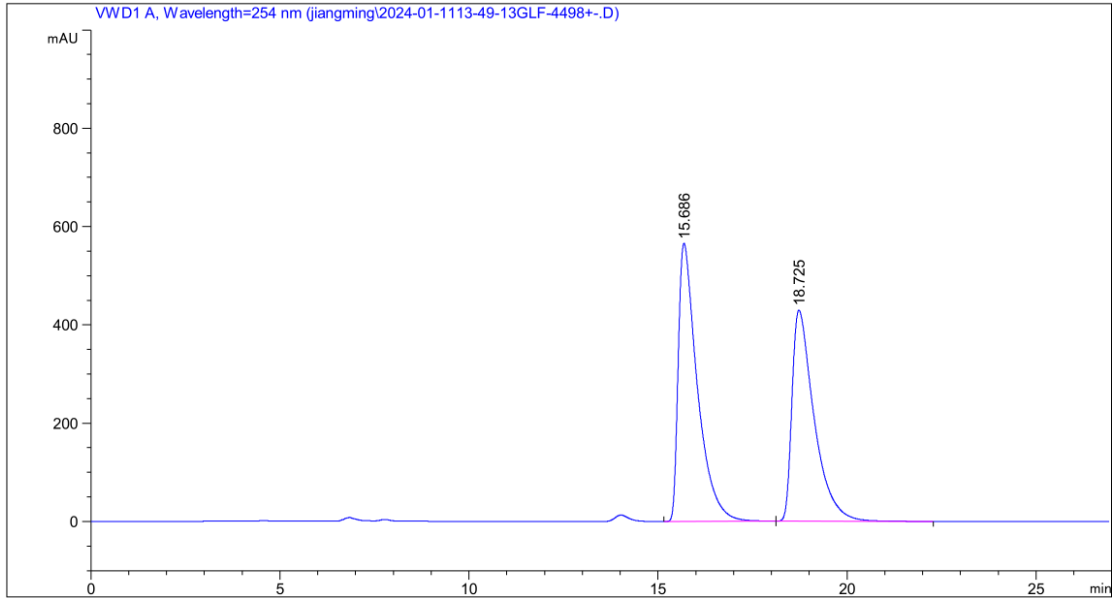

| Peak # | RetTime [min] | Type | Width [min] | Area [mAU*s] | Height [mAU] | Area %  |
|--------|---------------|------|-------------|--------------|--------------|---------|
| 1      | 15.686        | BB   | 0.5253      | 1.98731e4    | 566.48511    | 52.2398 |
| 2      | 18.725        | BB   | 0.5990      | 1.74545e4    | 429.58163    | 47.7602 |

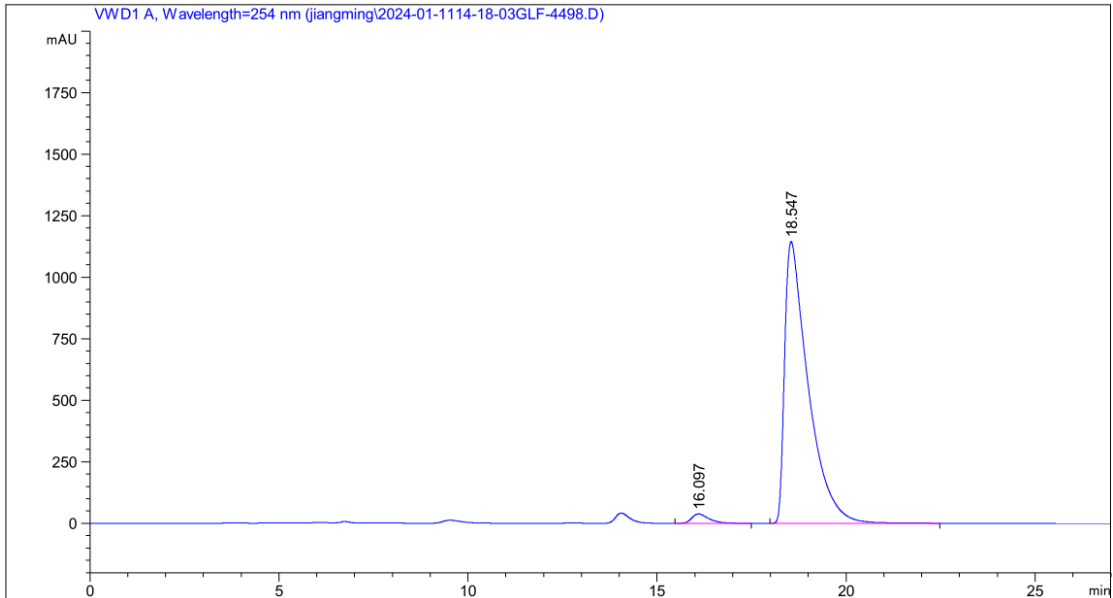

| Peak # | RetTime [min] | Type | Width [min] | Area [mAU*s] | Height [mAU] | Area %  |
|--------|---------------|------|-------------|--------------|--------------|---------|
| 1      | 16.097        | BB   | 0.4716      | 1212.55603   | 38.58886     | 2.3880  |
| 2      | 18.547        | BB   | 0.6183      | 4.95636e4    | 1144.35962   | 97.6120 |

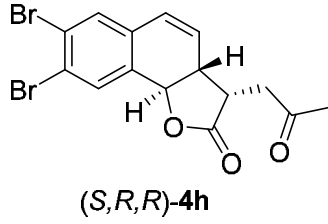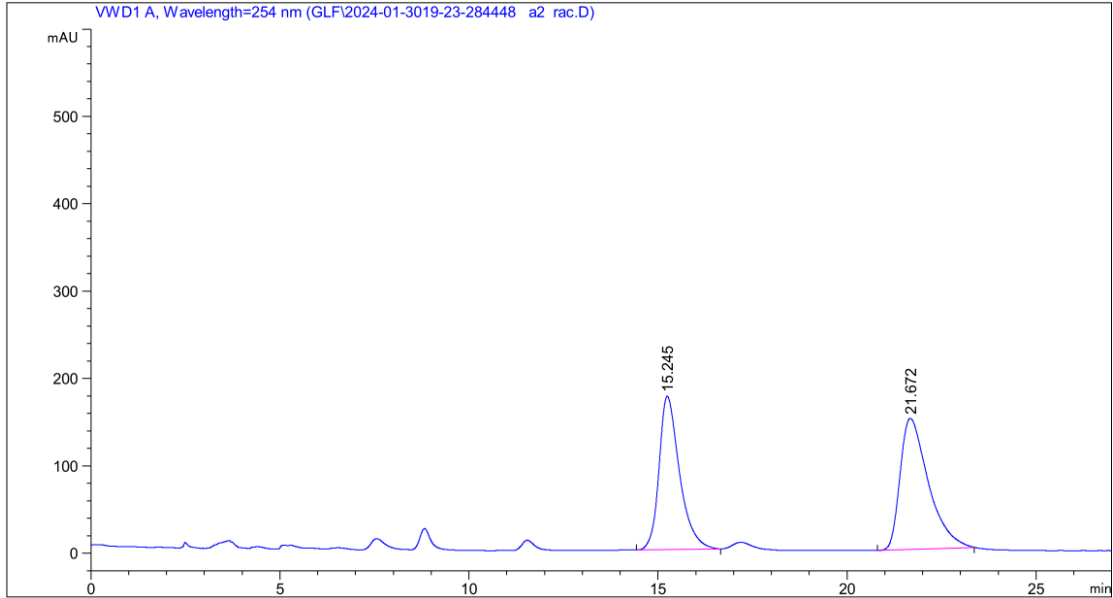

| Peak # | RetTime [min] | Type | Width [min] | Area [mAU*s] | Height [mAU] | Area %  |
|--------|---------------|------|-------------|--------------|--------------|---------|
| 1      | 15.245        | BB   | 0.5671      | 6619.77197   | 175.46933    | 47.9278 |
| 2      | 21.672        | BBA  | 0.7694      | 7793.65234   | 149.95270    | 52.0722 |

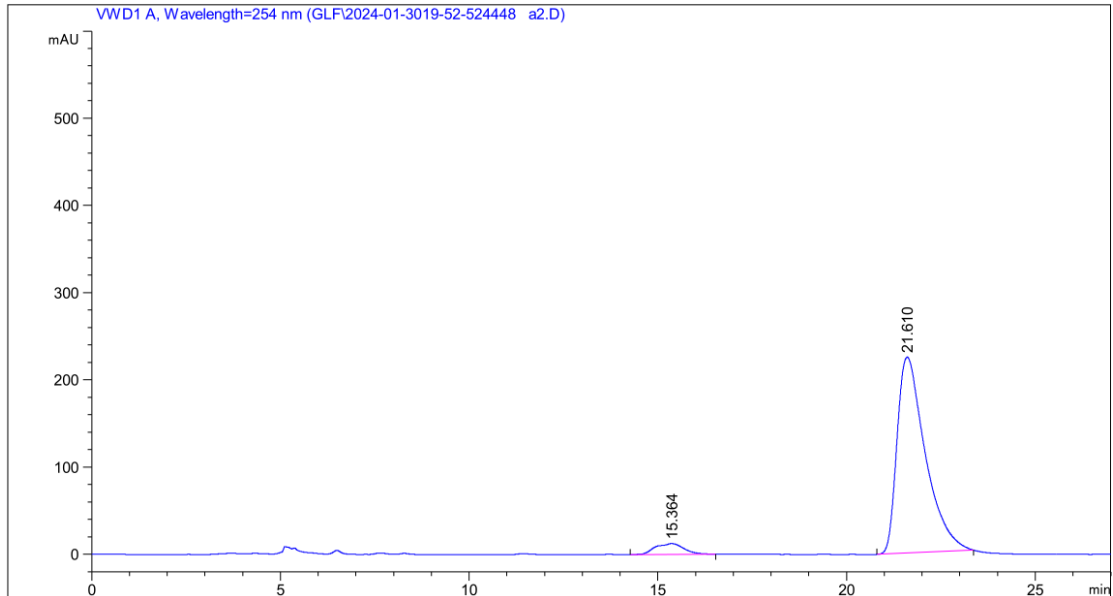

| Peak # | RetTime [min] | Type | Width [min] | Area [mAU*s] | Height [mAU] | Area %  |
|--------|---------------|------|-------------|--------------|--------------|---------|
| 1      | 15.364        | BB   | 0.7201      | 643.37189    | 12.32352     | 5.2100  |
| 2      | 21.610        | BBA  | 0.7597      | 1.17055e4    | 224.72862    | 94.7900 |

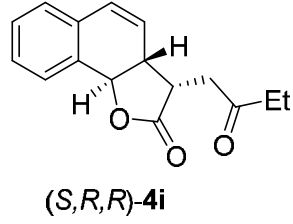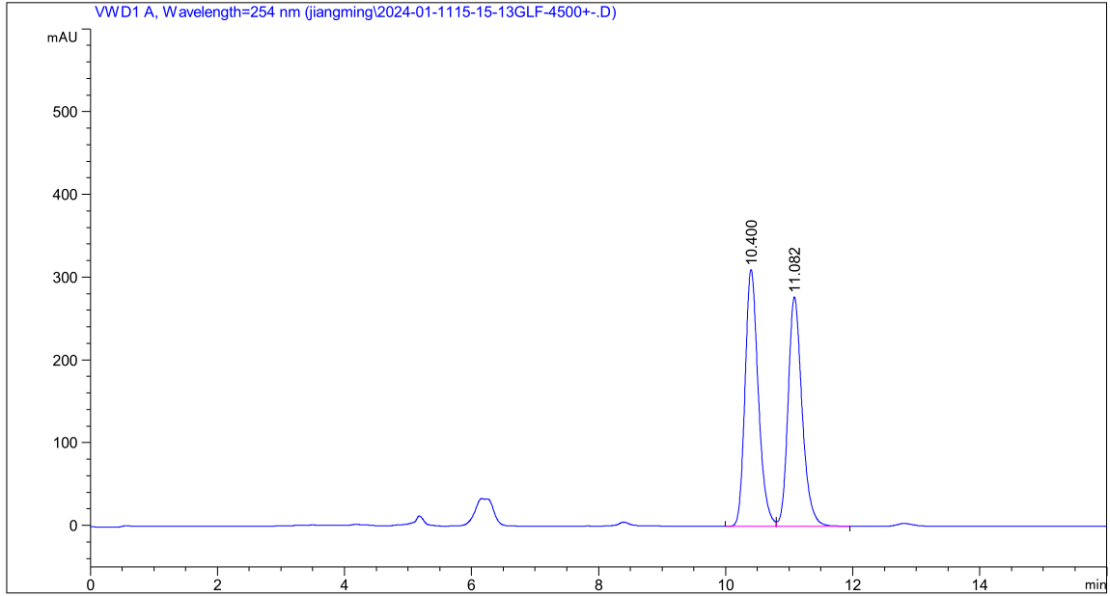

| Peak # | RetTime [min] | Type | Width [min] | Area [mAU*s] | Height [mAU] | Area %  |
|--------|---------------|------|-------------|--------------|--------------|---------|
| 1      | 10.400        | BV   | 0.2222      | 4498.04492   | 310.23553    | 50.4524 |
| 2      | 11.082        | VB   | 0.2337      | 4244.10791   | 277.05295    | 49.5476 |

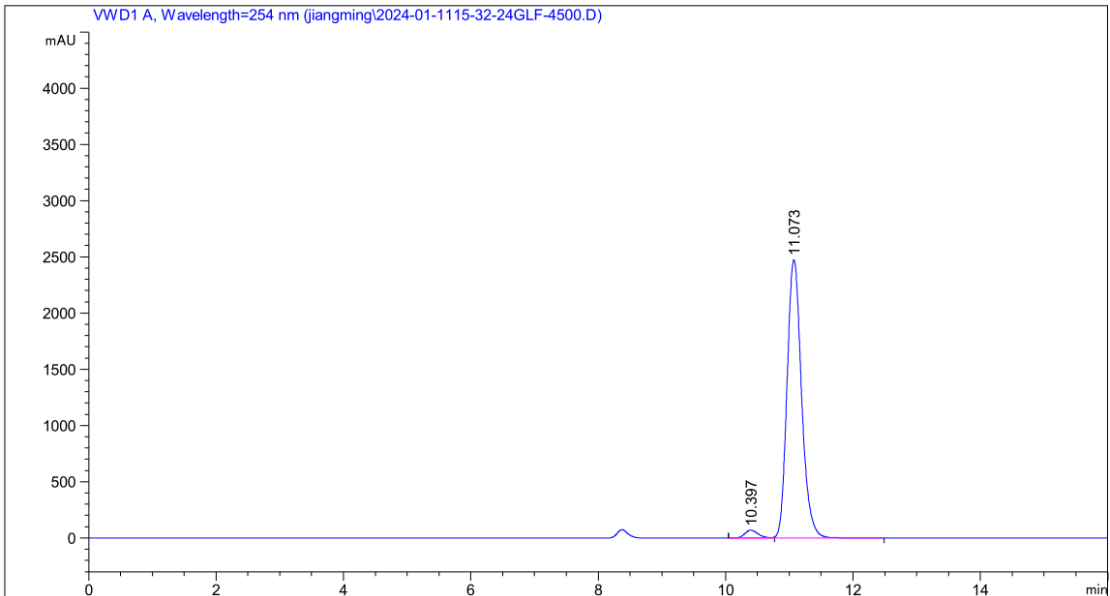

| Peak # | RetTime [min] | Type | Width [min] | Area [mAU*s] | Height [mAU] | Area %  |
|--------|---------------|------|-------------|--------------|--------------|---------|
| 1      | 10.397        | BV E | 0.2245      | 1027.01794   | 70.26724     | 2.5601  |
| 2      | 11.073        | VB R | 0.2442      | 3.90886e4    | 2475.96973   | 97.4399 |

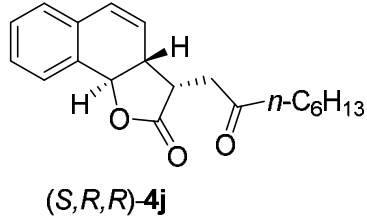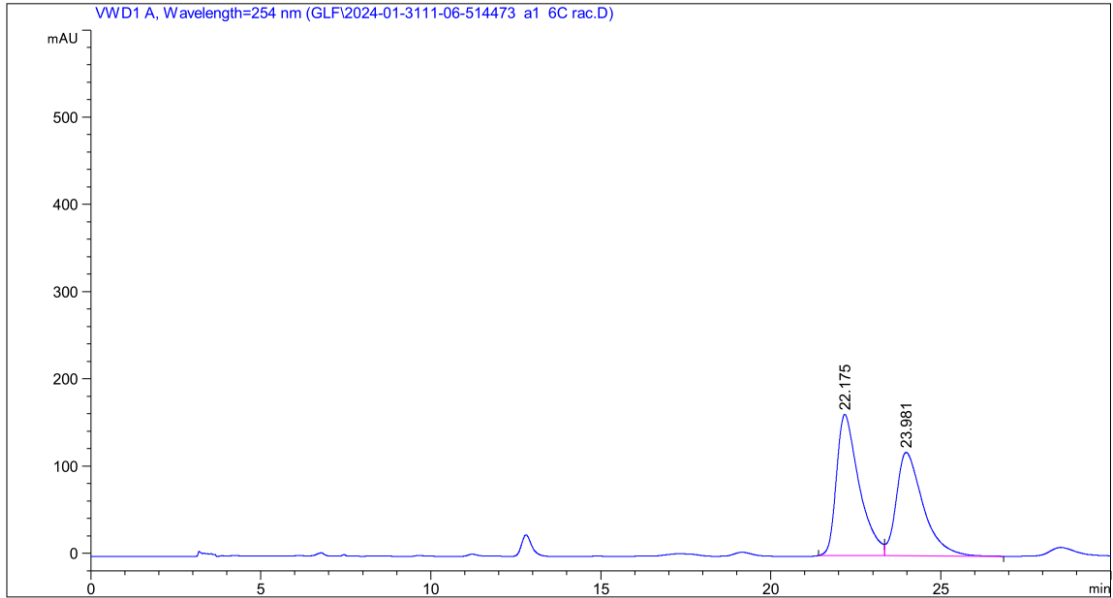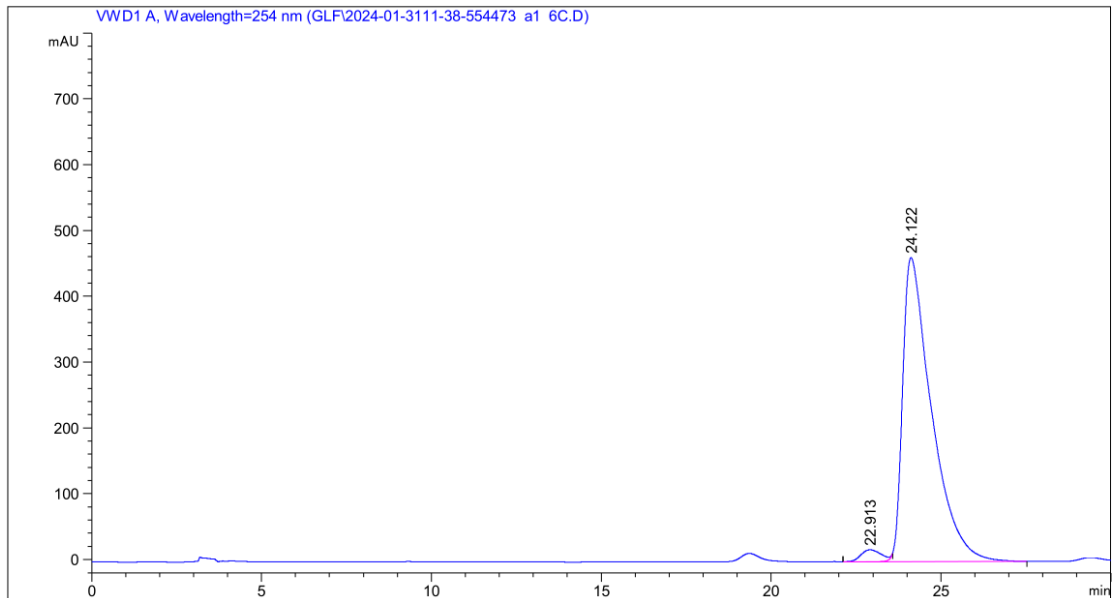

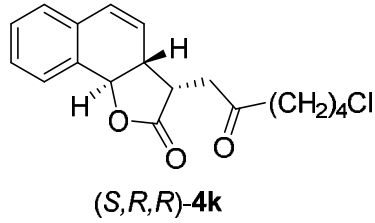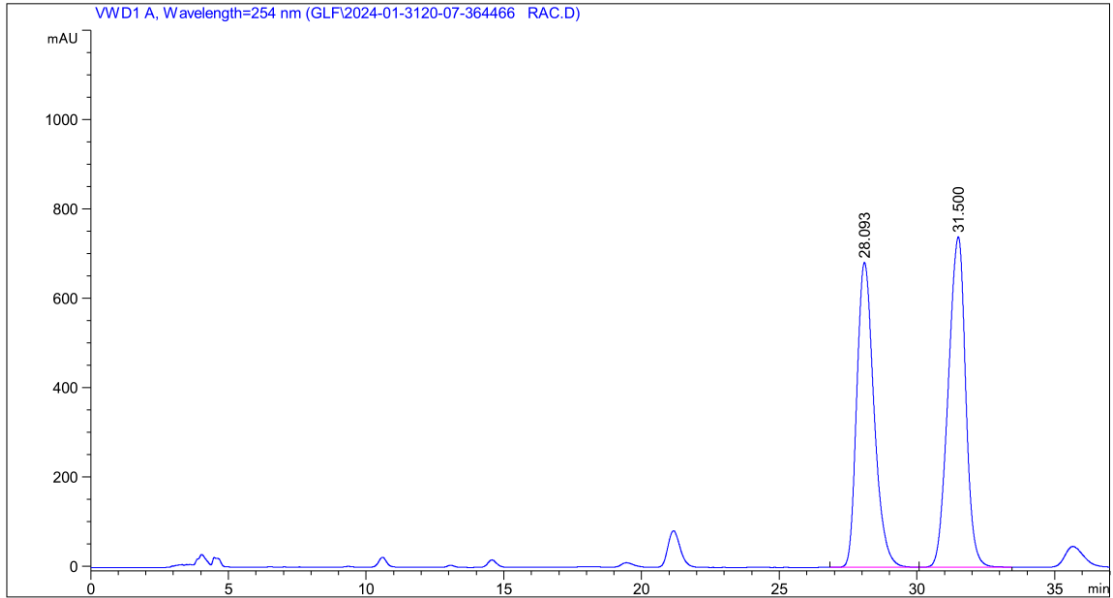

| Peak # | RetTime [min] | Type | Width [min] | Area [mAU*s] | Height [mAU] | Area %  |
|--------|---------------|------|-------------|--------------|--------------|---------|
| 1      | 28.093        | BB   | 0.6757      | 2.95557e4    | 681.89978    | 48.6748 |
| 2      | 31.500        | BB   | 0.6661      | 3.24386e4    | 739.02893    | 51.3252 |

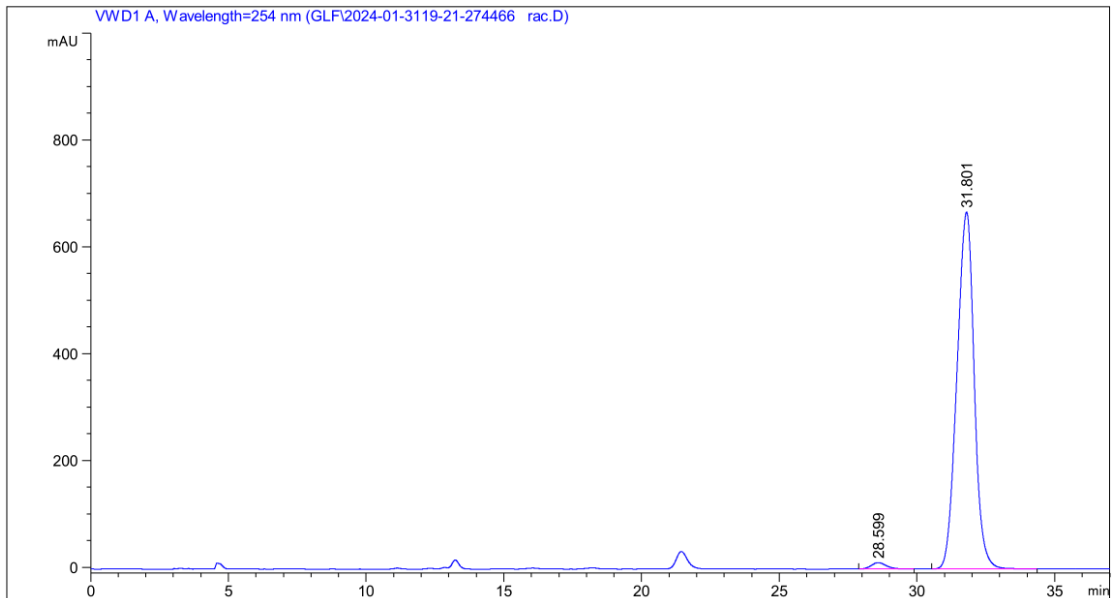

| Peak # | RetTime [min] | Type | Width [min] | Area [mAU*s] | Height [mAU] | Area %  |
|--------|---------------|------|-------------|--------------|--------------|---------|
| 1      | 28.599        | HH   | 0.5697      | 449.32431    | 11.92080     | 1.5201  |
| 2      | 31.801        | HH   | 0.6767      | 2.91101e4    | 667.57953    | 98.4799 |

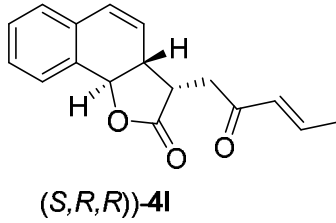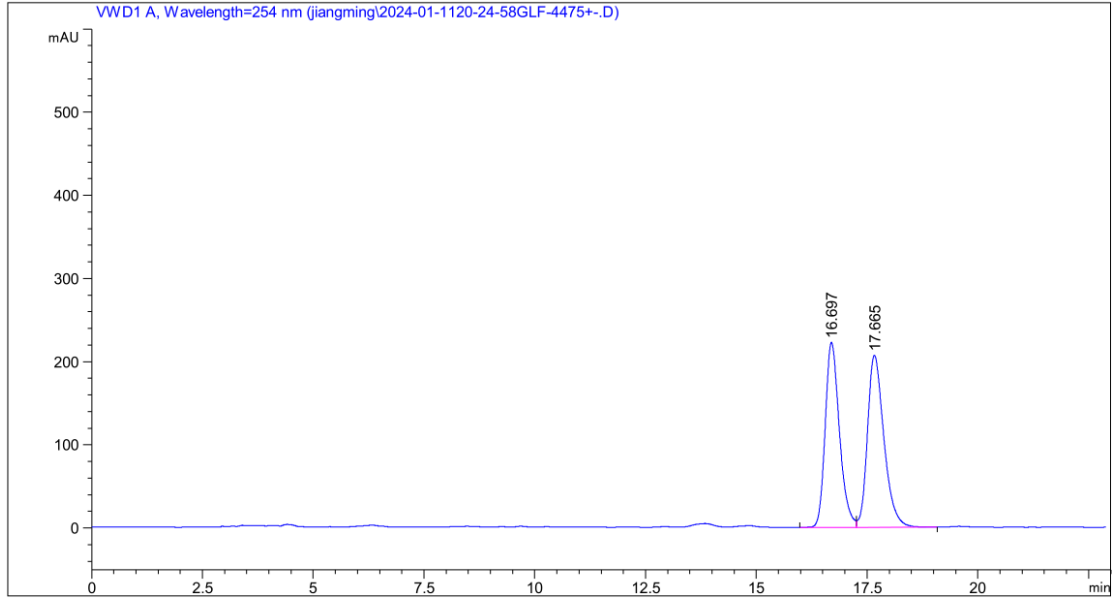

| Peak # | RetTime [min] | Type | Width [min] | Area [mAU*s] | Height [mAU] | Area %  |
|--------|---------------|------|-------------|--------------|--------------|---------|
| 1      | 16.697        | BV   | 0.3404      | 4964.72119   | 222.39754    | 48.1780 |
| 2      | 17.665        | VB   | 0.3943      | 5340.22314   | 206.75359    | 51.8220 |

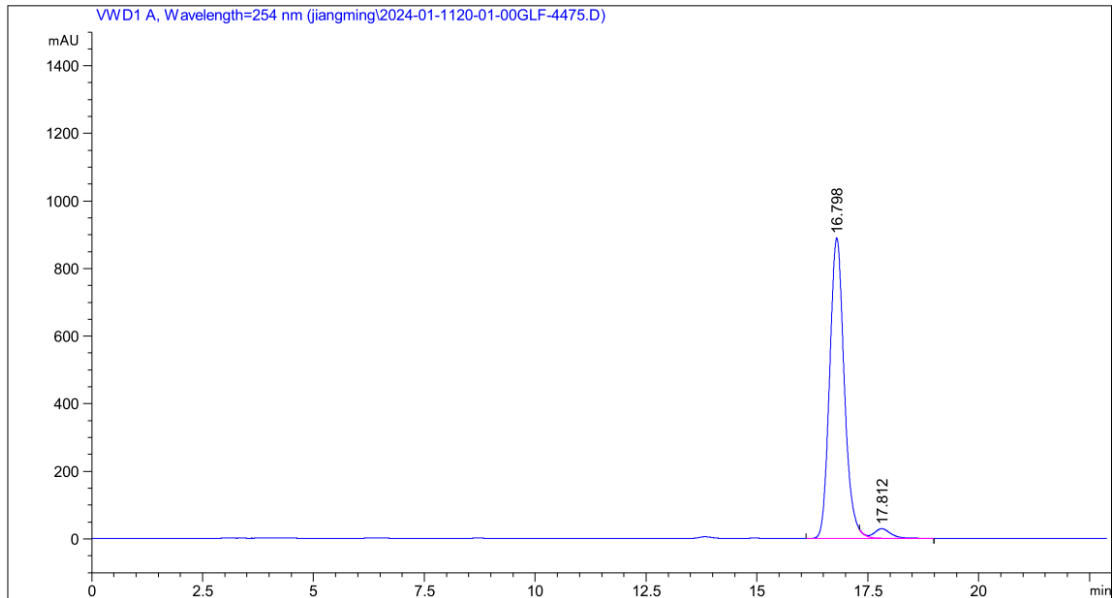

| Peak # | RetTime [min] | Type | Width [min] | Area [mAU*s] | Height [mAU] | Area %  |
|--------|---------------|------|-------------|--------------|--------------|---------|
| 1      | 16.798        | BV R | 0.3535      | 2.04728e4    | 889.54742    | 96.6243 |
| 2      | 17.812        | VB E | 0.3821      | 715.24329    | 28.18115     | 3.3757  |

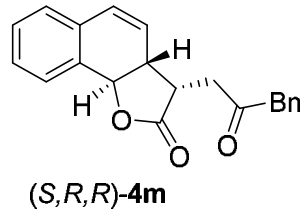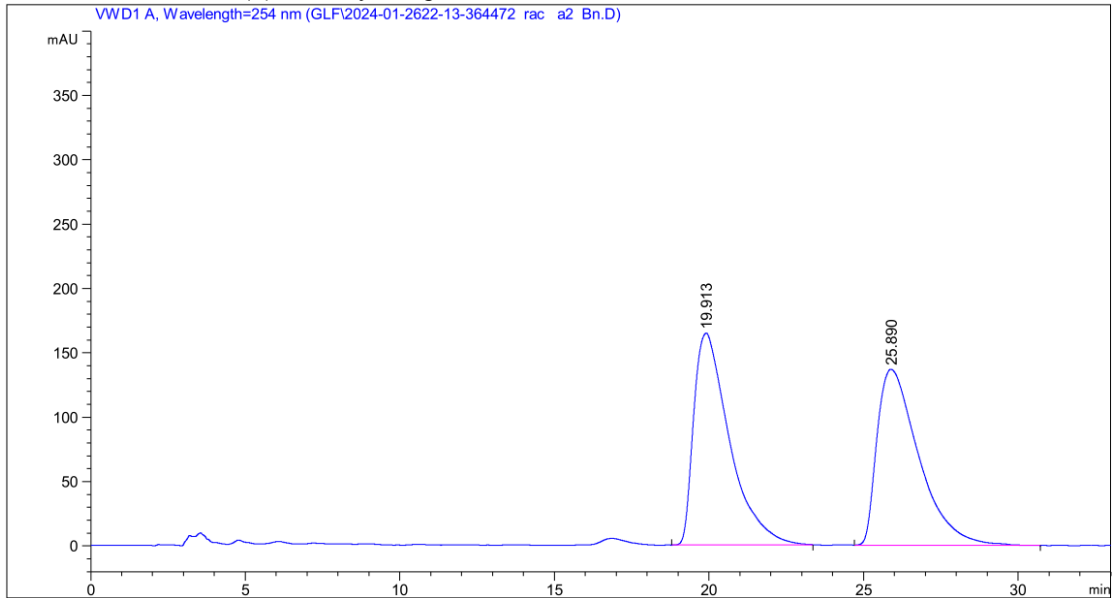

| Peak # | RetTime [min] | Type | Width [min] | Area [mAU*s] | Height [mAU] | Area %  |
|--------|---------------|------|-------------|--------------|--------------|---------|
| 1      | 19.913        | BBA  | 1.2200      | 1.32307e4    | 164.55432    | 50.7431 |
| 2      | 25.890        | BB   | 1.4113      | 1.28432e4    | 136.67883    | 49.2569 |

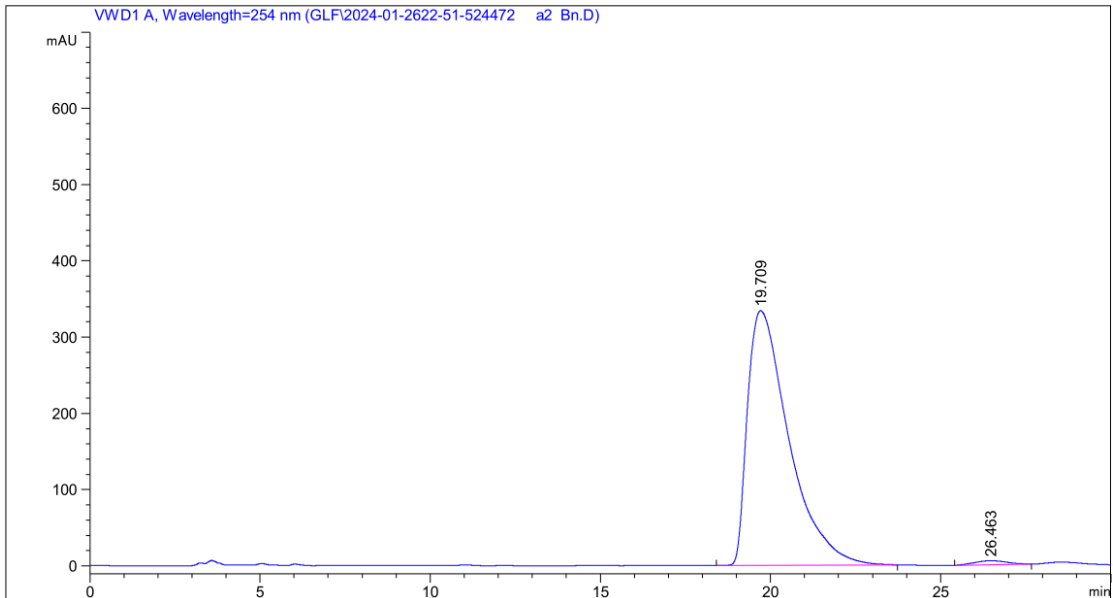

| Peak # | RetTime [min] | Type | Width [min] | Area [mAU*s] | Height [mAU] | Area %  |
|--------|---------------|------|-------------|--------------|--------------|---------|
| 1      | 19.709        | BBA  | 1.2704      | 2.81398e4    | 333.85138    | 98.7616 |
| 2      | 26.463        | BB   | 0.9230      | 352.86670    | 5.33936      | 1.2384  |

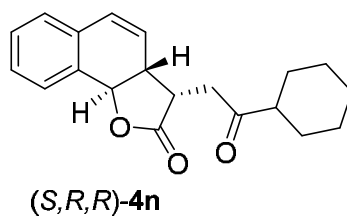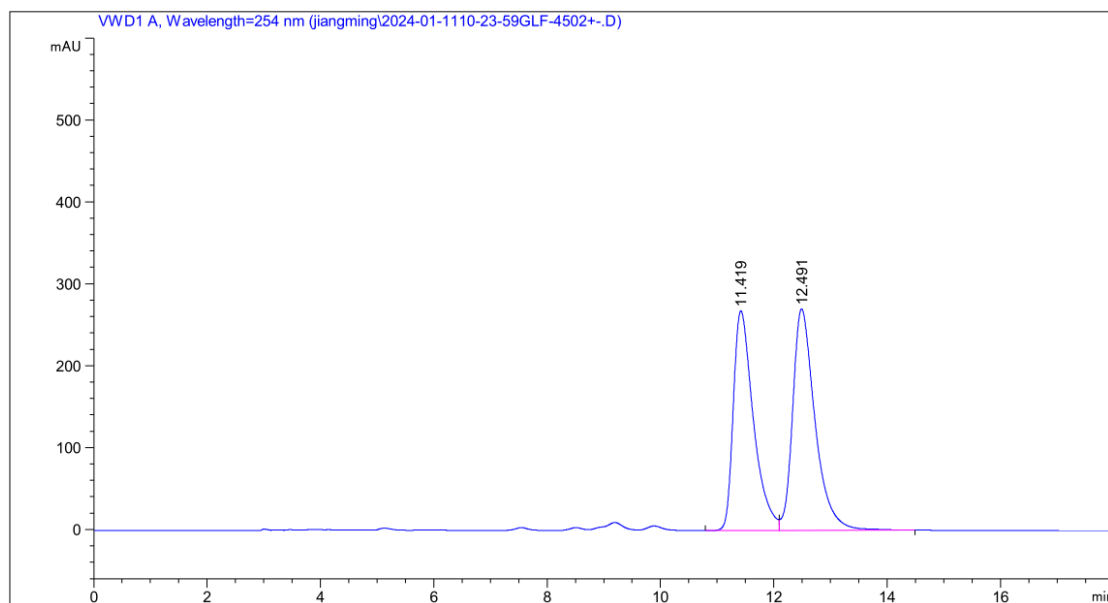

| Peak # | RetTime [min] | Type | Width [min] | Area [mAU*s] | Height [mAU] | Area %  |
|--------|---------------|------|-------------|--------------|--------------|---------|
| 1      | 11.419        | BV   | 0.3718      | 6607.56152   | 267.88489    | 49.1479 |
| 2      | 12.491        | VB   | 0.4137      | 7406.97314   | 270.27524    | 50.8521 |

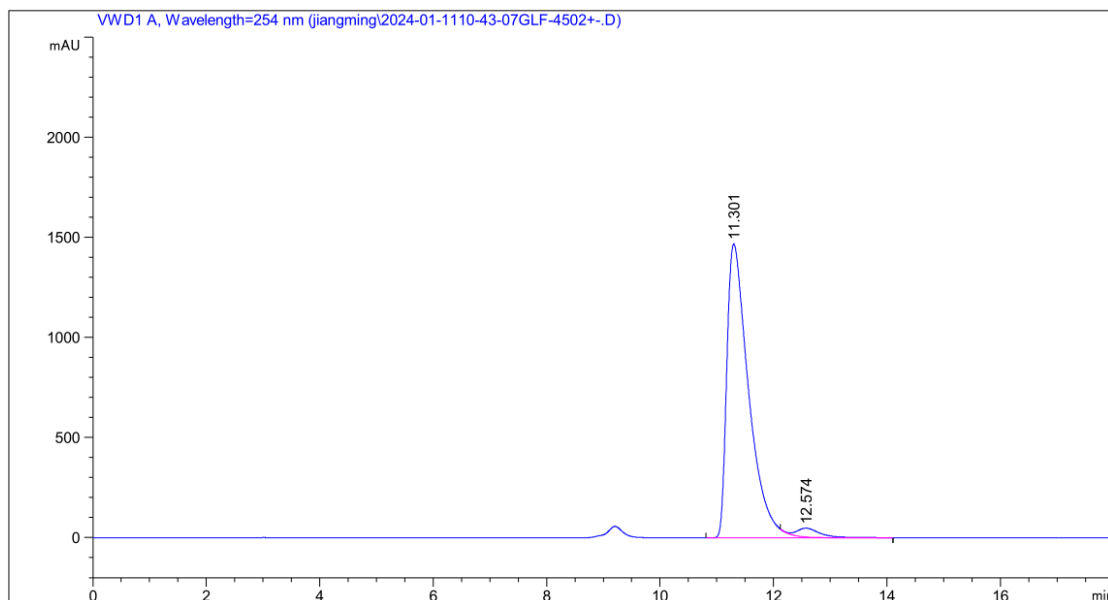

| Peak # | RetTime [min] | Type | Width [min] | Area [mAU*s] | Height [mAU] | Area %  |
|--------|---------------|------|-------------|--------------|--------------|---------|
| 1      | 11.301        | BV R | 0.3985      | 3.91821e4    | 1467.52588   | 96.8422 |
| 2      | 12.574        | VB E | 0.4324      | 1277.62854   | 43.79144     | 3.1578  |

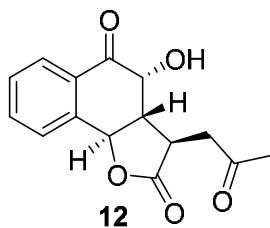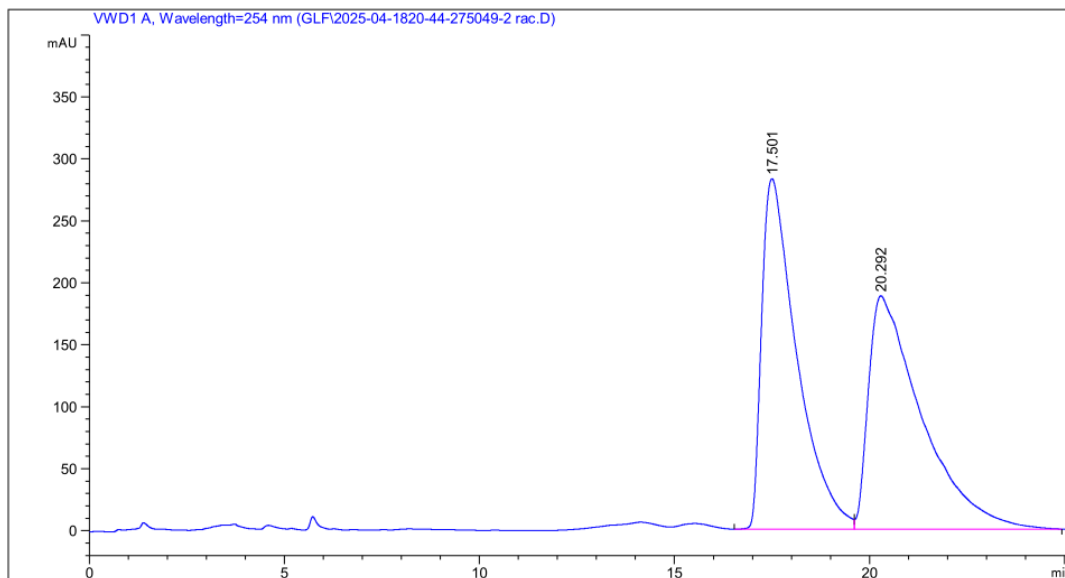

| Peak # | RetTime [min] | Type | Width [min] | Area [mAU*s] | Height [mAU] | Area %  |
|--------|---------------|------|-------------|--------------|--------------|---------|
| 1      | 17.501        | BV   | 0.8816      | 1.77135e4    | 282.84723    | 49.9258 |
| 2      | 20.292        | VBA  | 1.2470      | 1.77661e4    | 188.26498    | 50.0742 |

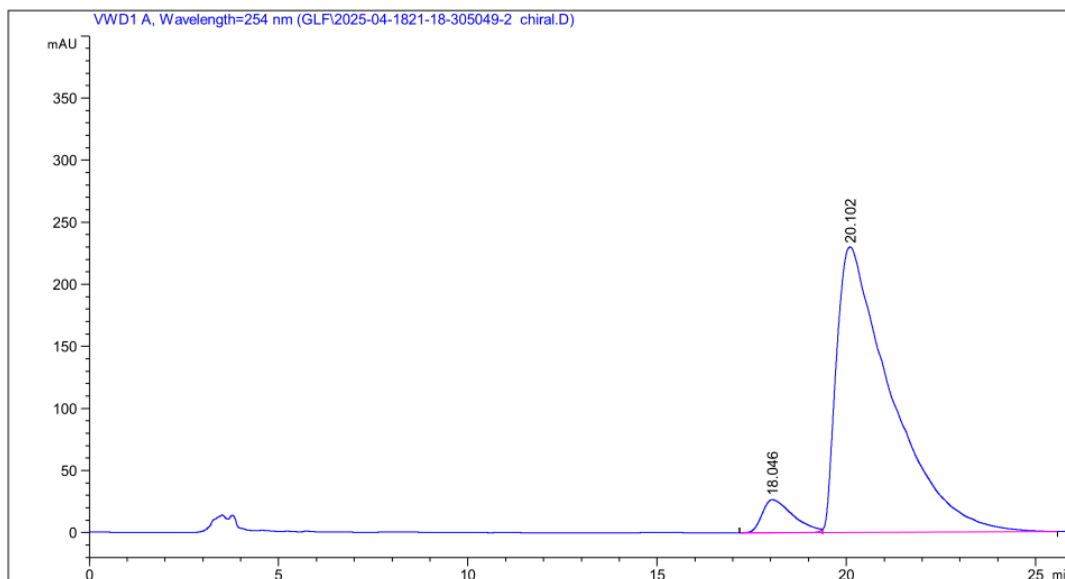

| Peak # | RetTime [min] | Type | Width [min] | Area [mAU*s] | Height [mAU] | Area %  |
|--------|---------------|------|-------------|--------------|--------------|---------|
| 1      | 18.046        | BV E | 0.8402      | 1487.53125   | 26.52913     | 6.0555  |
| 2      | 20.102        | VB R | 1.3847      | 2.30774e4    | 229.77969    | 93.9445 |

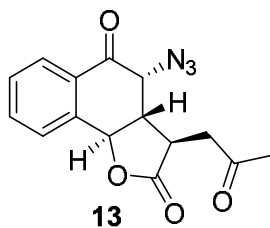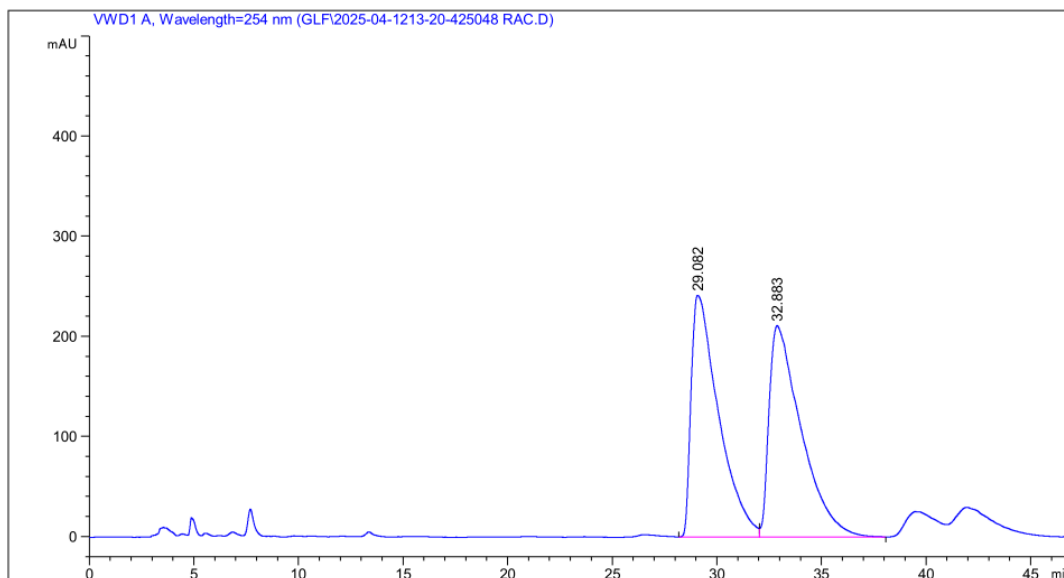

| Peak # | RetTime [min] | Type | Width [min] | Area [mAU*s] | Height [mAU] | Area %  |
|--------|---------------|------|-------------|--------------|--------------|---------|
| 1      | 29.082        | BV   | 1.2755      | 2.20437e4    | 241.37202    | 49.4967 |
| 2      | 32.883        | VB   | 1.4466      | 2.24921e4    | 211.00339    | 50.5033 |

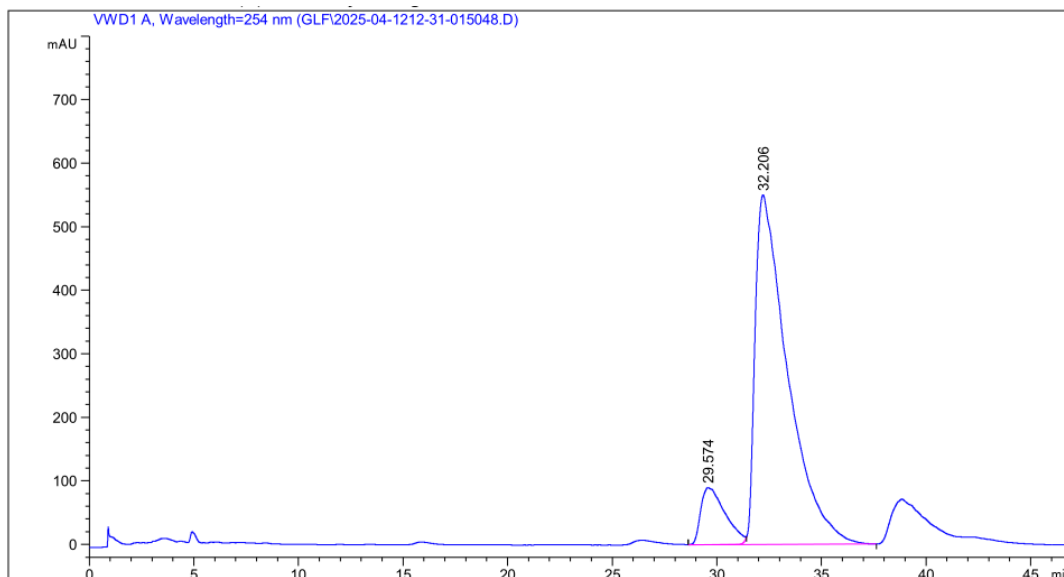

| Peak # | RetTime [min] | Type | Width [min] | Area [mAU*s] | Height [mAU] | Area %  |
|--------|---------------|------|-------------|--------------|--------------|---------|
| 1      | 29.574        | BV E | 1.0838      | 7256.35742   | 89.70256     | 10.9142 |
| 2      | 32.206        | VB R | 1.4300      | 5.92291e4    | 550.15436    | 89.0858 |

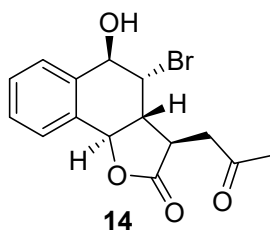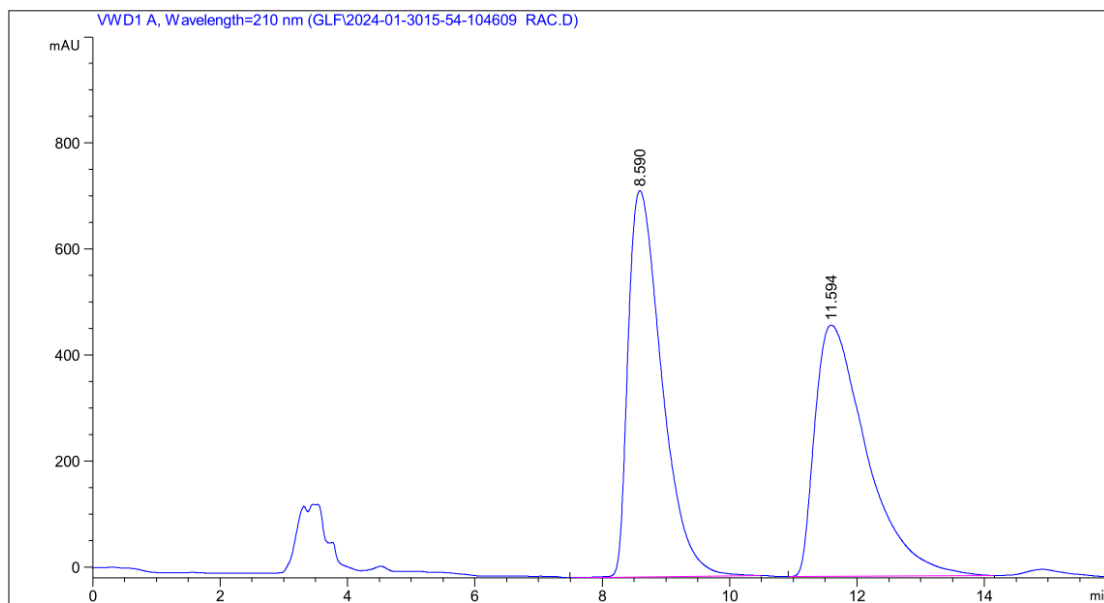

| Peak # | RetTime [min] | Type | Width [min] | Area [mAU*s] | Height [mAU] | Area %  |
|--------|---------------|------|-------------|--------------|--------------|---------|
| 1      | 8.590         | BB   | 0.5682      | 2.67442e4    | 728.67029    | 50.0465 |
| 2      | 11.594        | BB   | 0.8367      | 2.66946e4    | 474.24036    | 49.9535 |

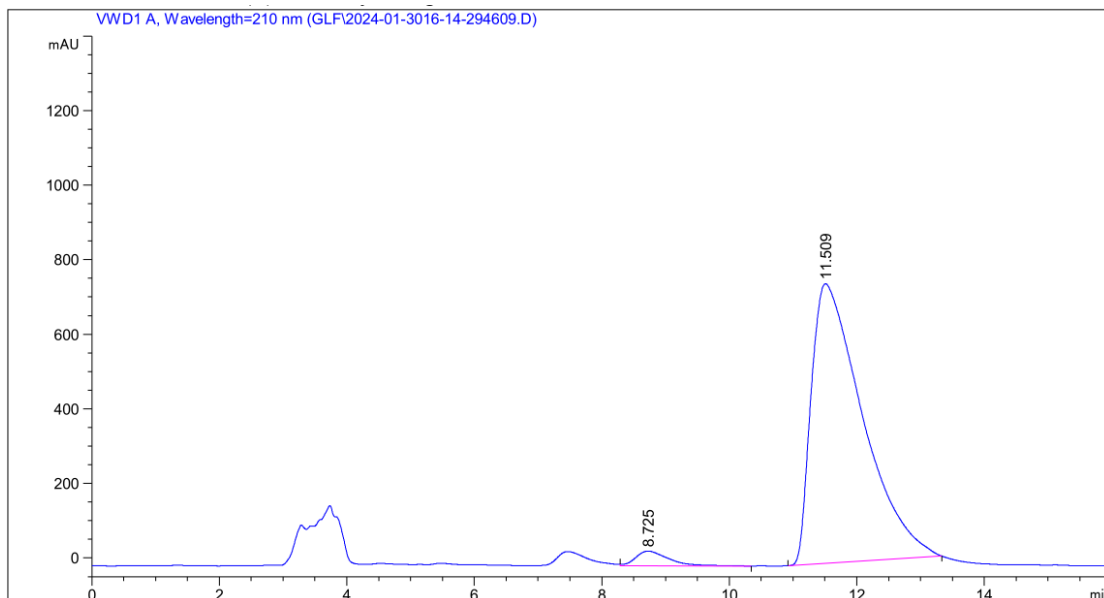

| Peak # | RetTime [min] | Type | Width [min] | Area [mAU*s] | Height [mAU] | Area %  |
|--------|---------------|------|-------------|--------------|--------------|---------|
| 1      | 8.725         | VB   | 0.5324      | 1422.11011   | 39.46996     | 3.2827  |
| 2      | 11.509        | BBA  | 0.8399      | 4.18990e4    | 749.84259    | 96.7173 |

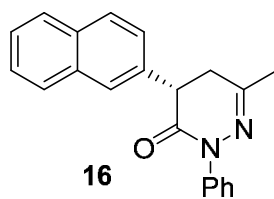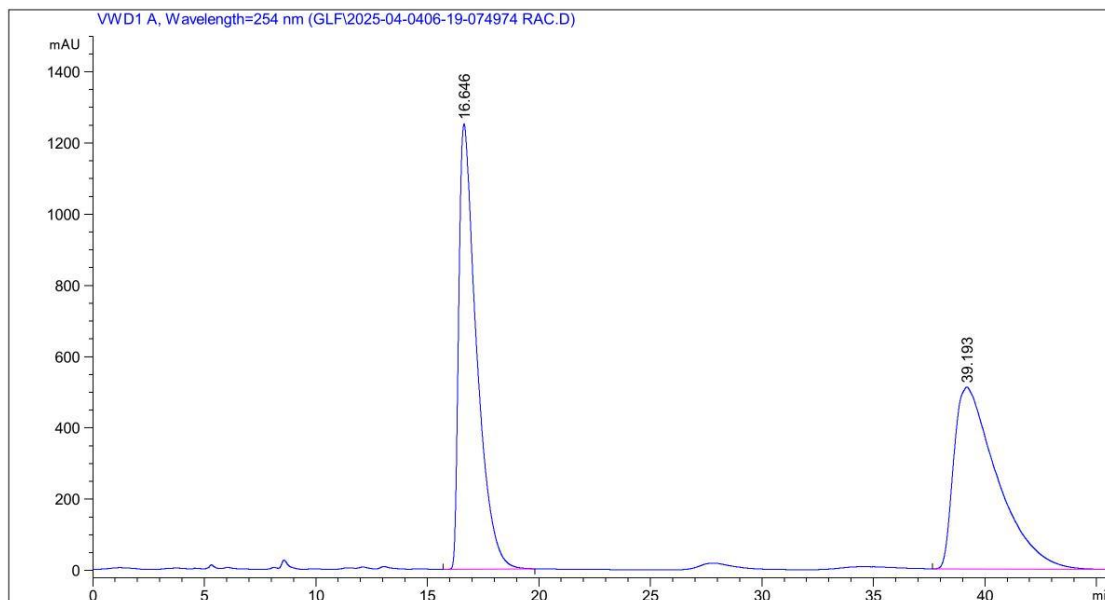

| Peak # | RetTime [min] | Type | Width [min] | Area [mAU*s] | Height [mAU] | Area %  |
|--------|---------------|------|-------------|--------------|--------------|---------|
| 1      | 16.646        | BB   | 0.8184      | 6.91554e4    | 1250.11572   | 50.0333 |
| 2      | 39.193        | BBA  | 1.8290      | 6.90634e4    | 510.62399    | 49.9667 |

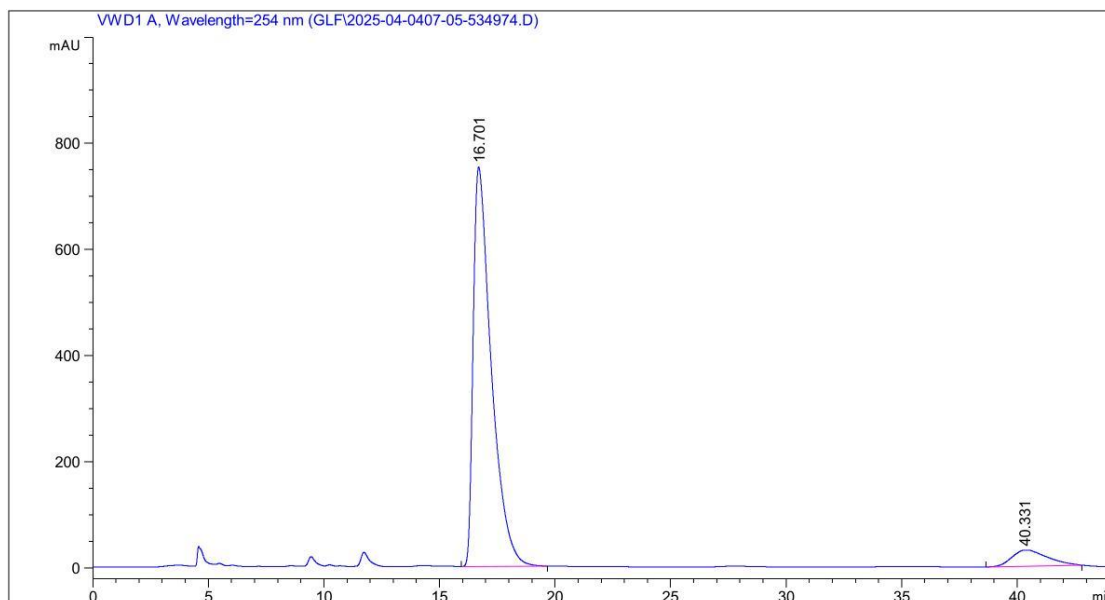

| Peak # | RetTime [min] | Type | Width [min] | Area [mAU*s] | Height [mAU] | Area %  |
|--------|---------------|------|-------------|--------------|--------------|---------|
| 1      | 16.701        | BB   | 0.8060      | 4.09719e4    | 752.73364    | 92.7546 |
| 2      | 40.331        | BBA  | 1.3952      | 3200.48315   | 30.35250     | 7.2454  |

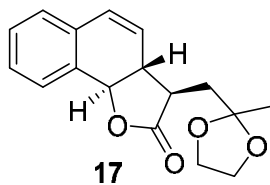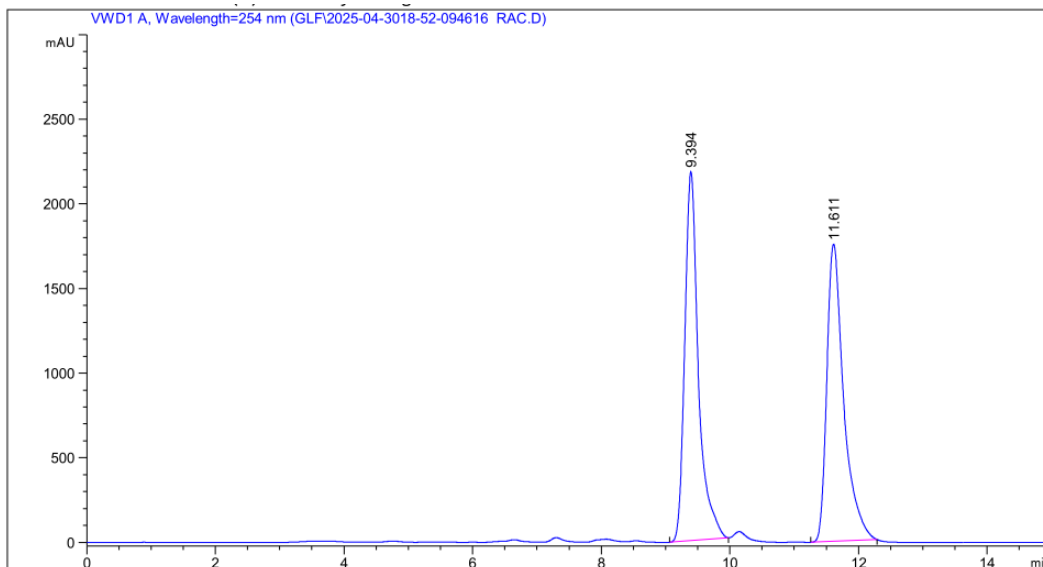

| Peak # | RetTime [min] | Type | Width [min] | Area [mAU*s] | Height [mAU] | Area %  |
|--------|---------------|------|-------------|--------------|--------------|---------|
| 1      | 9.394         | BB   | 0.2202      | 3.21605e4    | 2178.97290   | 50.1238 |
| 2      | 11.611        | BBA  | 0.2726      | 3.20017e4    | 1755.99670   | 49.8762 |

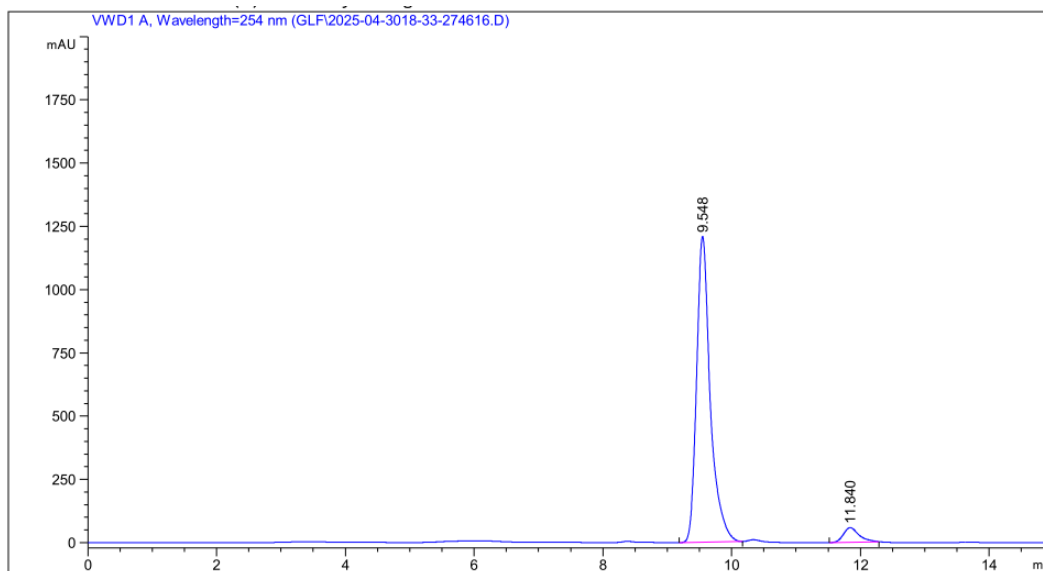

| Peak # | RetTime [min] | Type | Width [min] | Area [mAU*s] | Height [mAU] | Area %  |
|--------|---------------|------|-------------|--------------|--------------|---------|
| 1      | 9.548         | BB   | 0.2202      | 1.78459e4    | 1208.82666   | 94.8876 |
| 2      | 11.840        | BBA  | 0.2522      | 961.49896    | 57.46272     | 5.1124  |

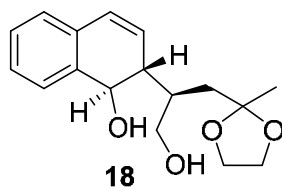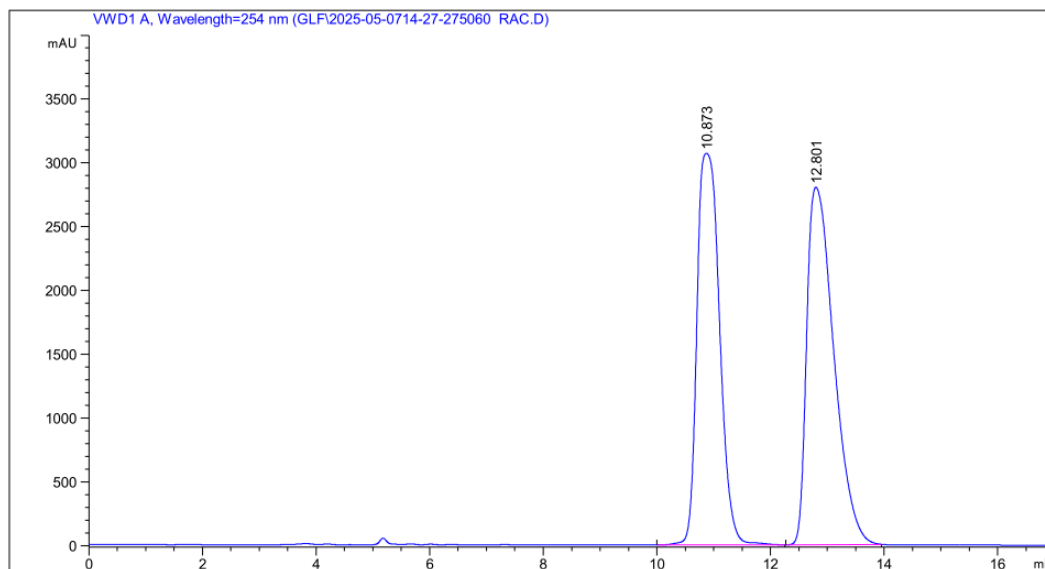

| Peak # | RetTime [min] | Type | Width [min] | Area [mAU*s] | Height [mAU] | Area %  |
|--------|---------------|------|-------------|--------------|--------------|---------|
| 1      | 10.873        | BB   | 0.4341      | 8.47123e4    | 3068.78149   | 47.7950 |
| 2      | 12.801        | BBA  | 0.5055      | 9.25287e4    | 2800.05688   | 52.2050 |

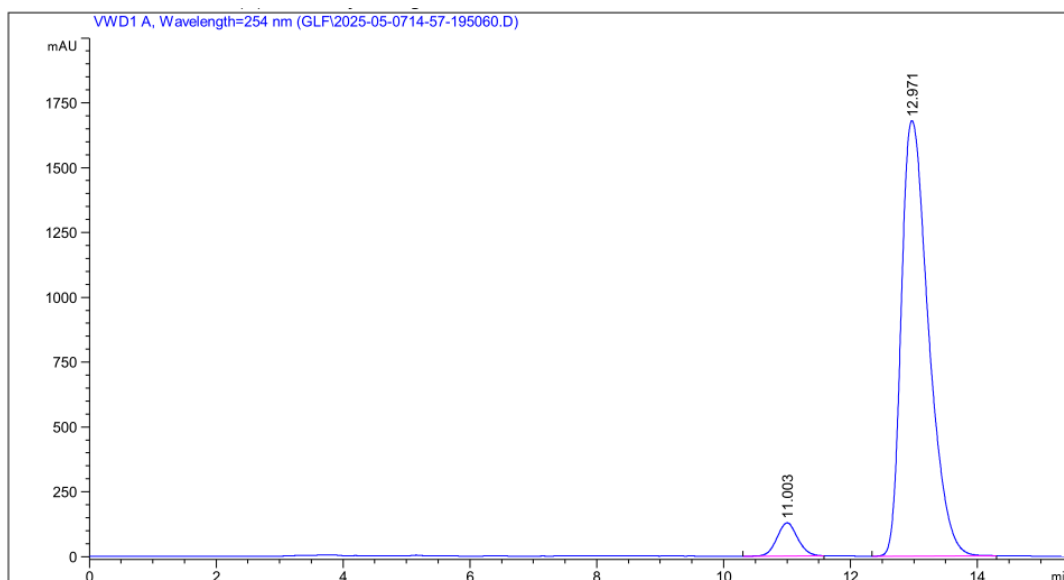

| Peak # | RetTime [min] | Type | Width [min] | Area [mAU*s] | Height [mAU] | Area %  |
|--------|---------------|------|-------------|--------------|--------------|---------|
| 1      | 11.003        | BBA  | 0.3481      | 2890.78613   | 127.71815    | 5.4748  |
| 2      | 12.971        | BBA  | 0.4508      | 4.99113e4    | 1678.91138   | 94.5252 |

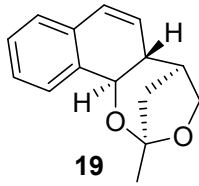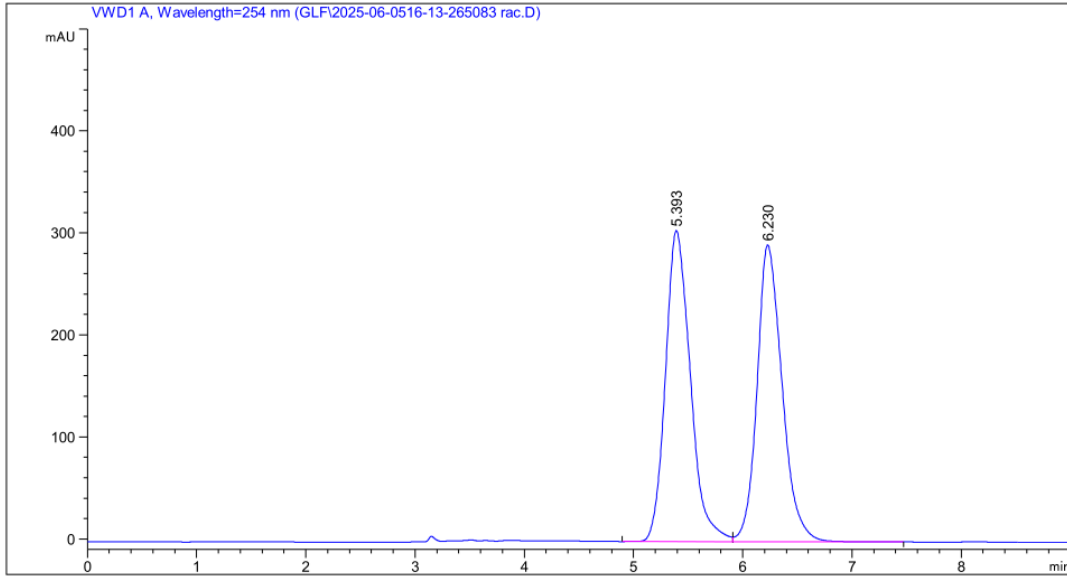

| Peak # | RetTime [min] | Type | Width [min] | Area [mAU*s] | Height [mAU] | Area %  |
|--------|---------------|------|-------------|--------------|--------------|---------|
| 1      | 5.393         | BV   | 0.2511      | 4838.28320   | 304.94125    | 51.0174 |
| 2      | 6.230         | VB   | 0.2473      | 4645.30566   | 290.83701    | 48.9826 |

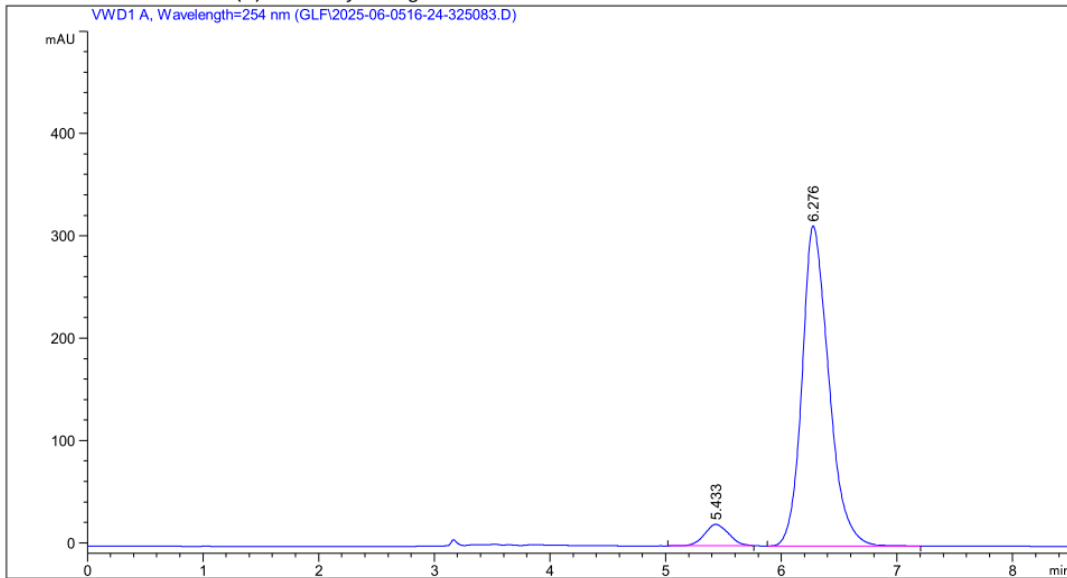

| Peak # | RetTime [min] | Type | Width [min] | Area [mAU*s] | Height [mAU] | Area %  |
|--------|---------------|------|-------------|--------------|--------------|---------|
| 1      | 5.433         | BBA  | 0.2300      | 301.59552    | 20.94279     | 5.6539  |
| 2      | 6.276         | BBA  | 0.2477      | 5032.65479   | 312.84402    | 94.3461 |

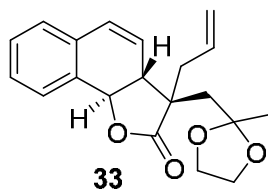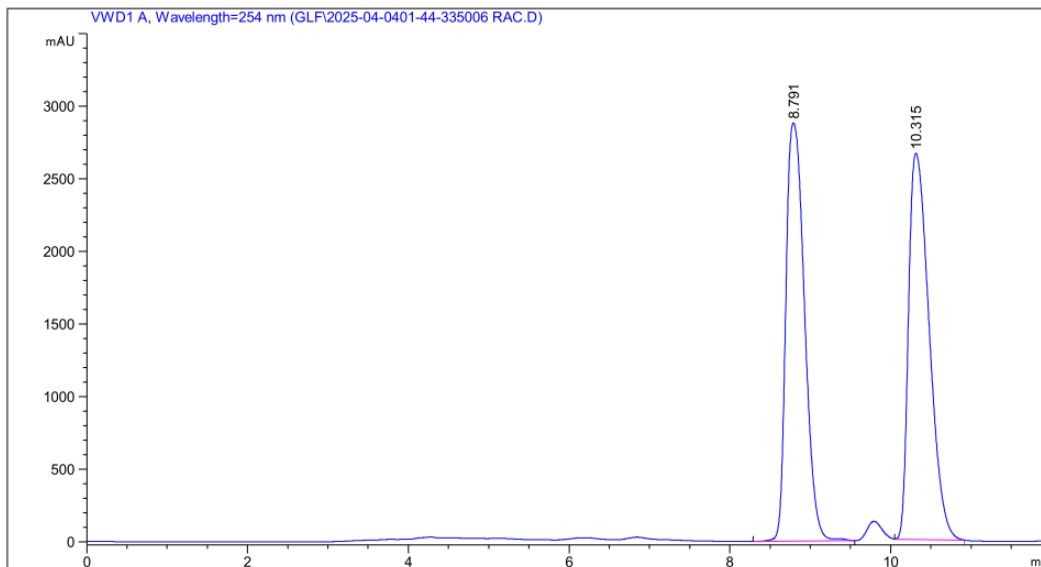

| Peak # | RetTime [min] | Type | Width [min] | Area [mAU*s] | Height [mAU] | Area %  |
|--------|---------------|------|-------------|--------------|--------------|---------|
| 1      | 8.791         | BV R | 0.2537      | 4.62110e4    | 2879.44165   | 49.4953 |
| 2      | 10.315        | BBA  | 0.2810      | 4.71535e4    | 2657.16211   | 50.5047 |

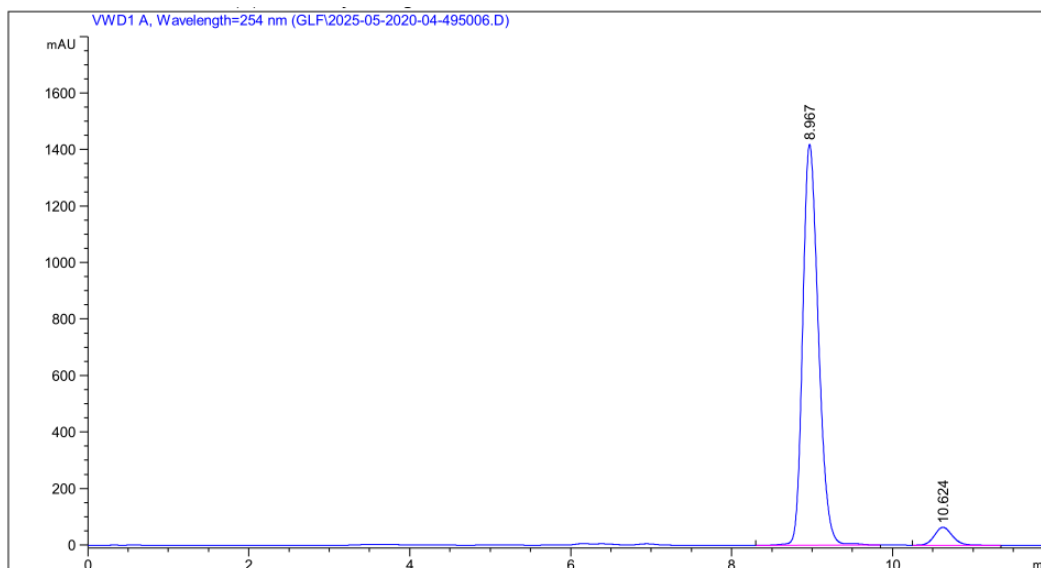

| Peak # | RetTime [min] | Type | Width [min] | Area [mAU*s] | Height [mAU] | Area %  |
|--------|---------------|------|-------------|--------------|--------------|---------|
| 1      | 8.967         | BV R | 0.2090      | 1.91633e4    | 1419.29504   | 95.1464 |
| 2      | 10.624        | BB   | 0.2388      | 977.55499    | 63.43624     | 4.8536  |

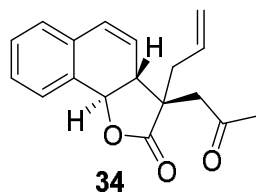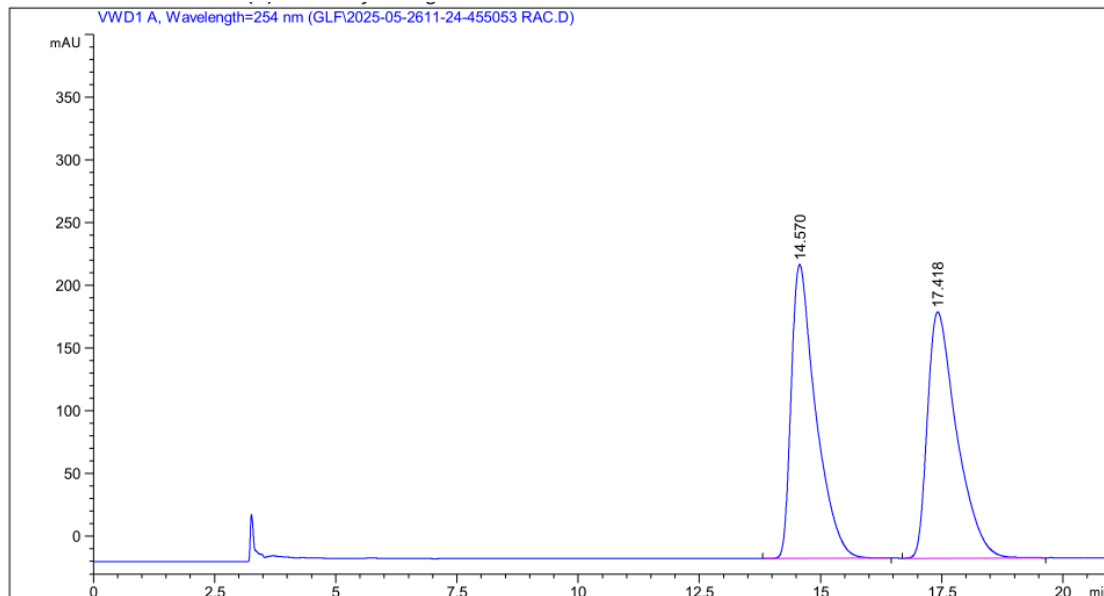

| Peak # | RetTime [min] | Type | Width [min] | Area [mAU*s] | Height [mAU] | Area %  |
|--------|---------------|------|-------------|--------------|--------------|---------|
| 1      | 14.570        | BB   | 0.5147      | 8242.87207   | 234.14523    | 49.9792 |
| 2      | 17.418        | BB   | 0.6338      | 8249.74707   | 196.10515    | 50.0208 |

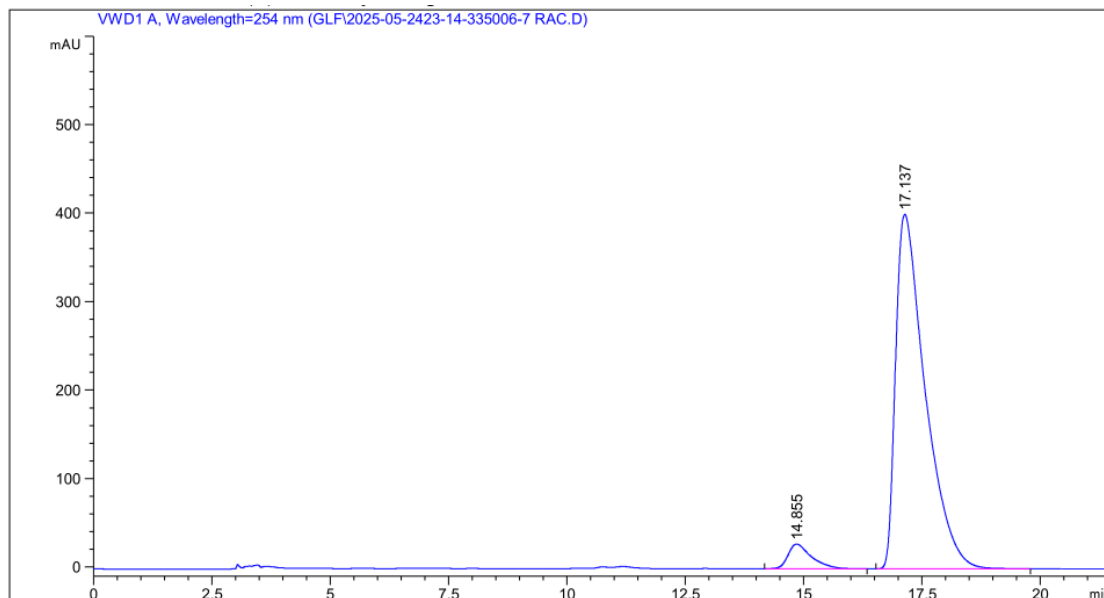

| Peak # | RetTime [min] | Type | Width [min] | Area [mAU*s] | Height [mAU] | Area %  |
|--------|---------------|------|-------------|--------------|--------------|---------|
| 1      | 14.855        | BB   | 0.5009      | 949.84540    | 27.85178     | 5.1881  |
| 2      | 17.137        | BB   | 0.6465      | 1.73583e4    | 400.62842    | 94.8119 |

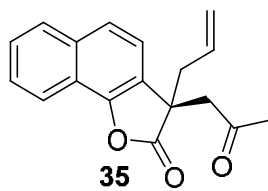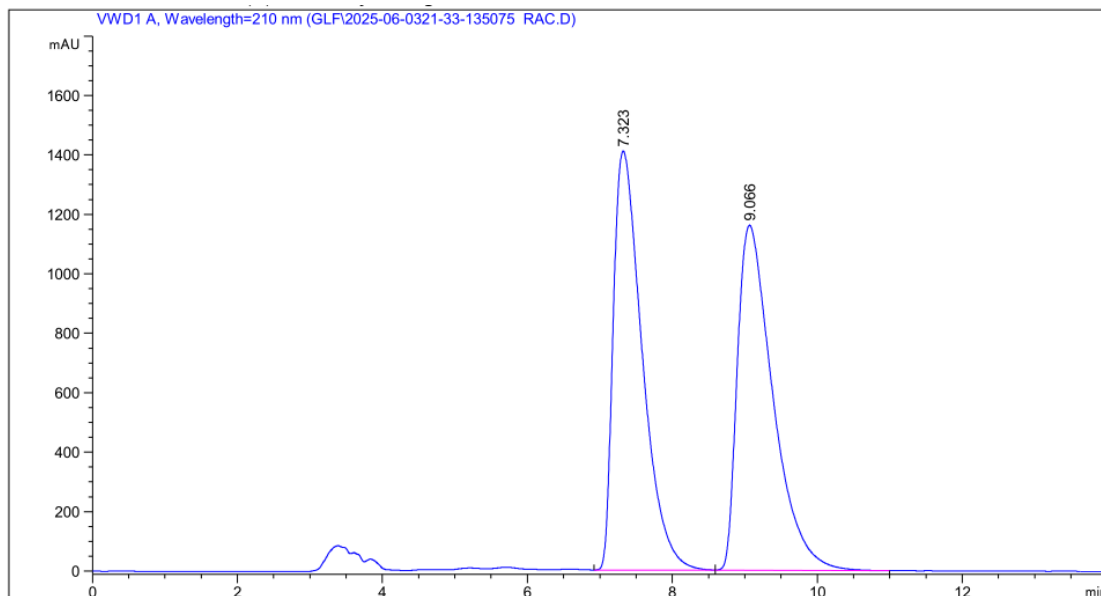

| Peak # | RetTime [min] | Type | Width [min] | Area [mAU*s] | Height [mAU] | Area %  |
|--------|---------------|------|-------------|--------------|--------------|---------|
| 1      | 7.323         | BB   | 0.4308      | 3.90107e4    | 1409.78345   | 49.7606 |
| 2      | 9.066         | BB   | 0.5192      | 3.93860e4    | 1159.69934   | 50.2394 |

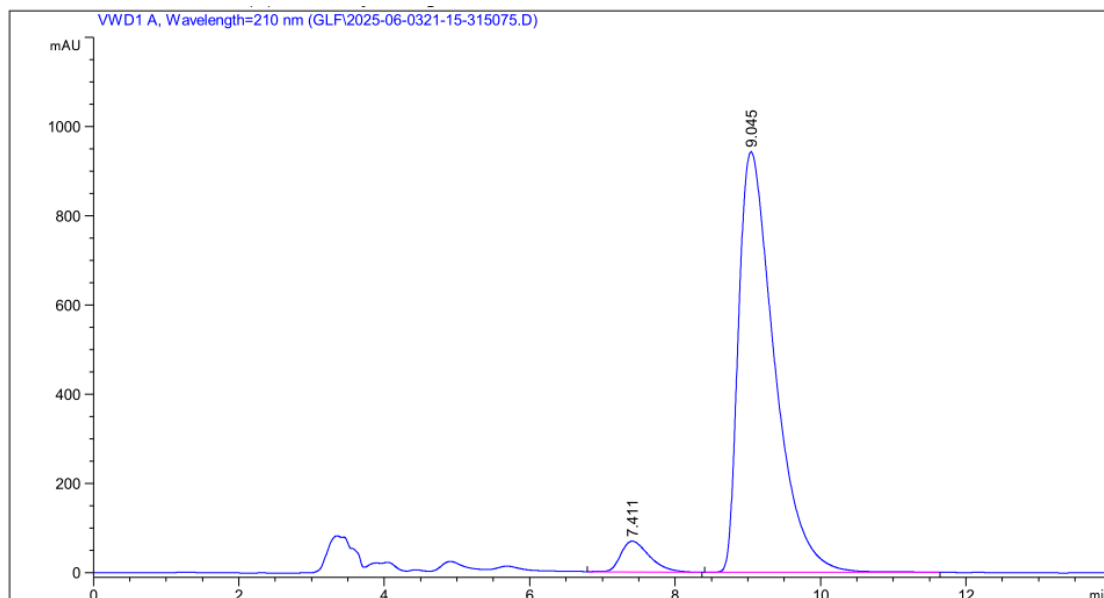

| Peak # | RetTime [min] | Type | Width [min] | Area [mAU*s] | Height [mAU] | Area %  |
|--------|---------------|------|-------------|--------------|--------------|---------|
| 1      | 7.411         | BB   | 0.4232      | 1879.21191   | 68.90212     | 5.5174  |
| 2      | 9.045         | BV R | 0.5225      | 3.21803e4    | 942.08911    | 94.4826 |

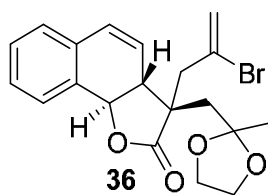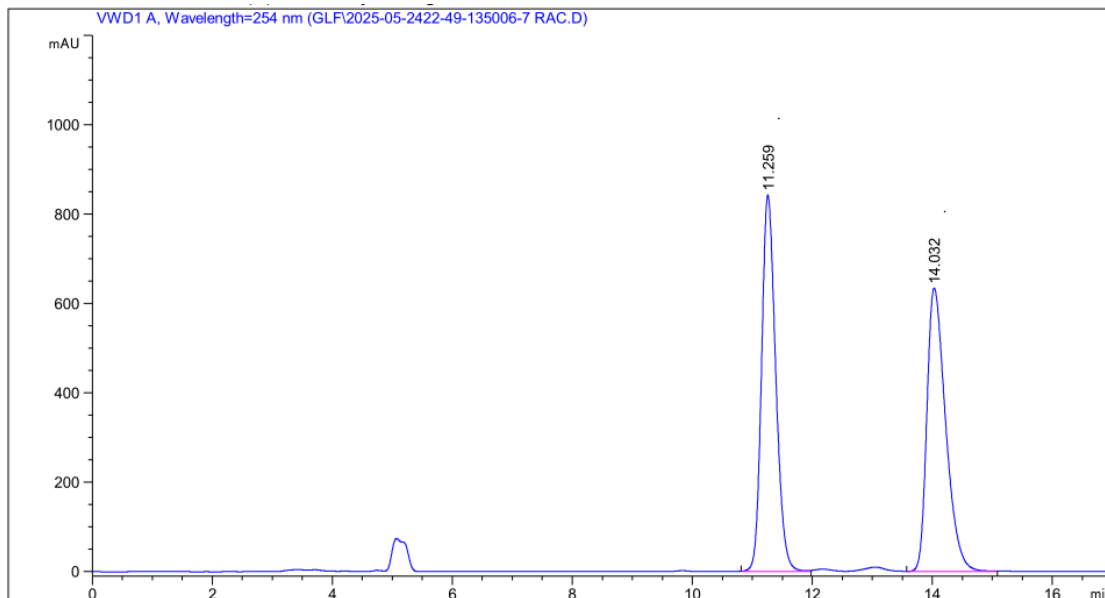

| Peak # | RetTime [min] | Type | Width [min] | Area [mAU*s] | Height [mAU] | Area %  |
|--------|---------------|------|-------------|--------------|--------------|---------|
| 1      | 11.259        | FM   | 0.2739      | 1.38461e4    | 842.59430    | 50.0651 |
| 2      | 14.032        | MF   | 0.3626      | 1.38101e4    | 634.85333    | 49.9349 |

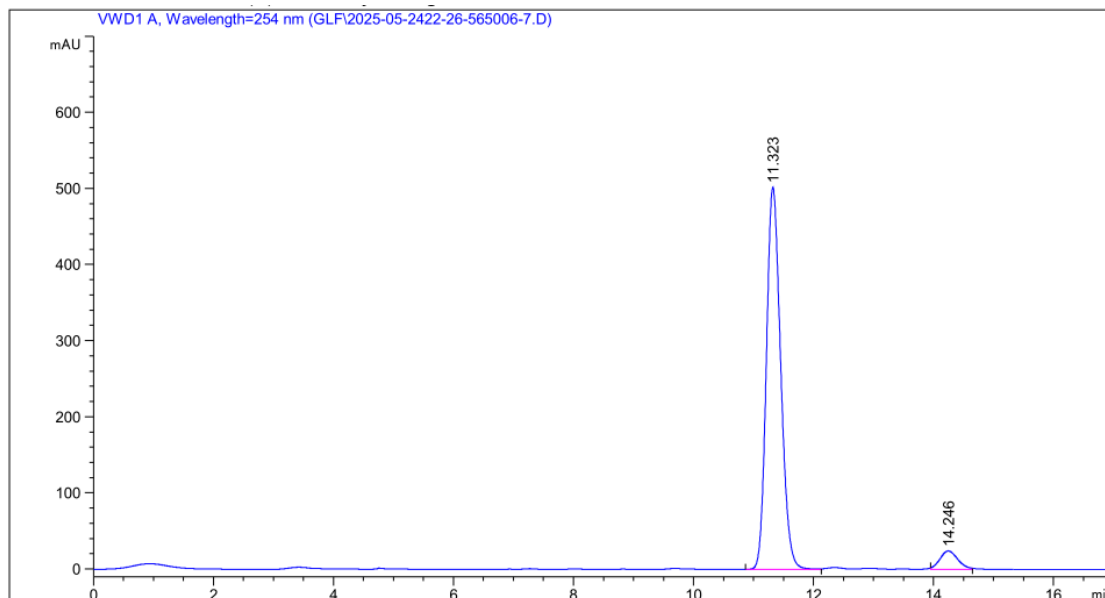

| Peak # | RetTime [min] | Type | Width [min] | Area [mAU*s] | Height [mAU] | Area %  |
|--------|---------------|------|-------------|--------------|--------------|---------|
| 1      | 11.323        | MF   | 0.2753      | 8292.87793   | 501.99460    | 94.3416 |
| 2      | 14.246        | MF   | 0.3436      | 497.38974    | 24.12485     | 5.6584  |

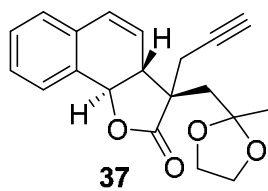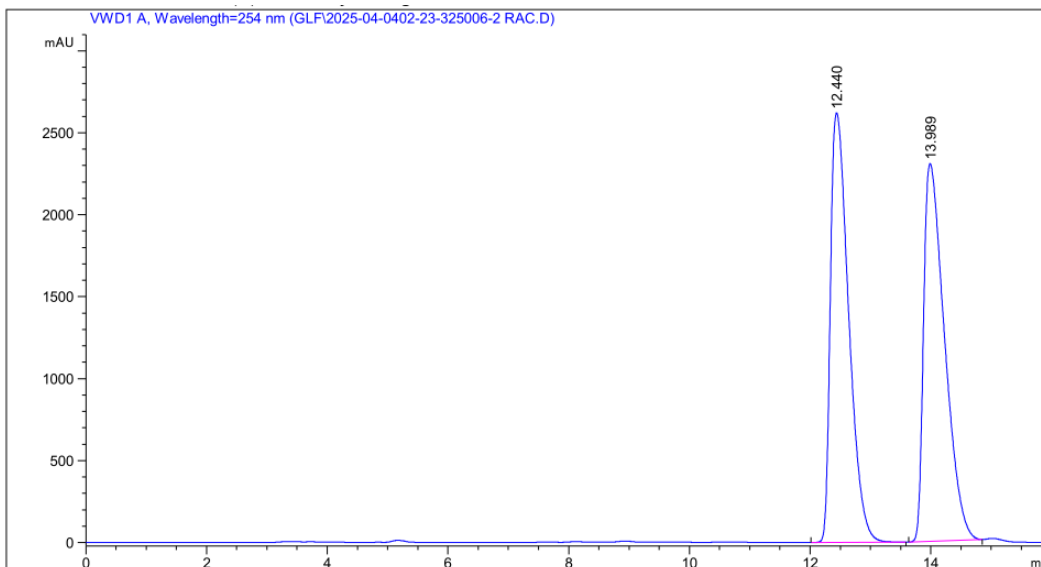

| Peak # | RetTime [min] | Type | Width [min] | Area [mAU*s] | Height [mAU] | Area %  |
|--------|---------------|------|-------------|--------------|--------------|---------|
| 1      | 12.440        | BB   | 0.3219      | 5.50124e4    | 2620.56445   | 49.7799 |
| 2      | 13.989        | BB   | 0.3639      | 5.54990e4    | 2305.37158   | 50.2201 |

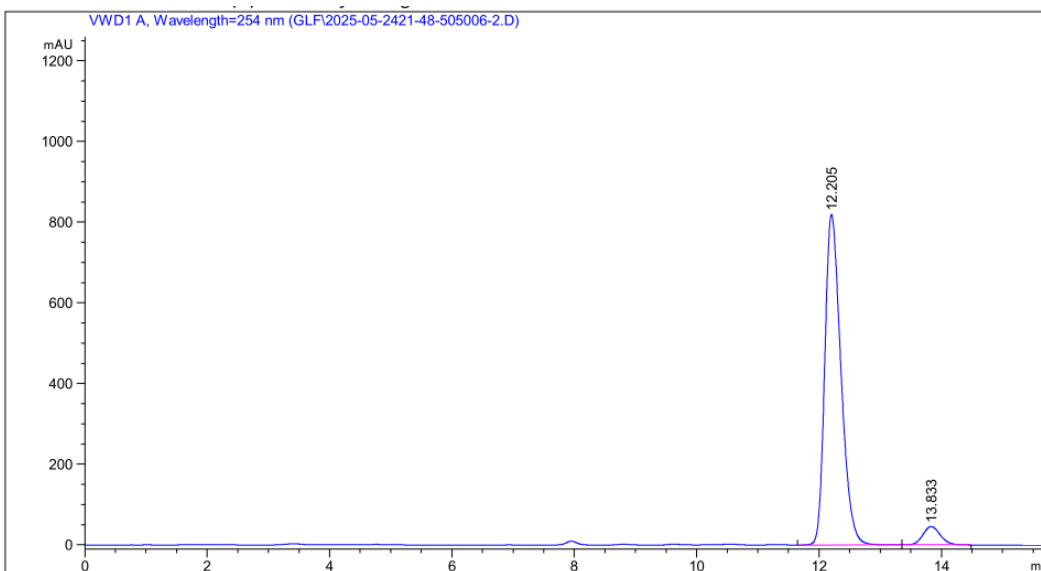

| Peak # | RetTime [min] | Type | Width [min] | Area [mAU*s] | Height [mAU] | Area %  |
|--------|---------------|------|-------------|--------------|--------------|---------|
| 1      | 12.205        | BB   | 0.2816      | 1.50059e4    | 819.75598    | 94.3417 |
| 2      | 13.833        | BB   | 0.3077      | 900.00122    | 45.51839     | 5.6583  |

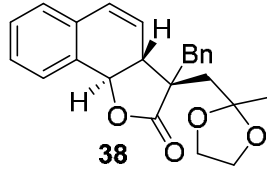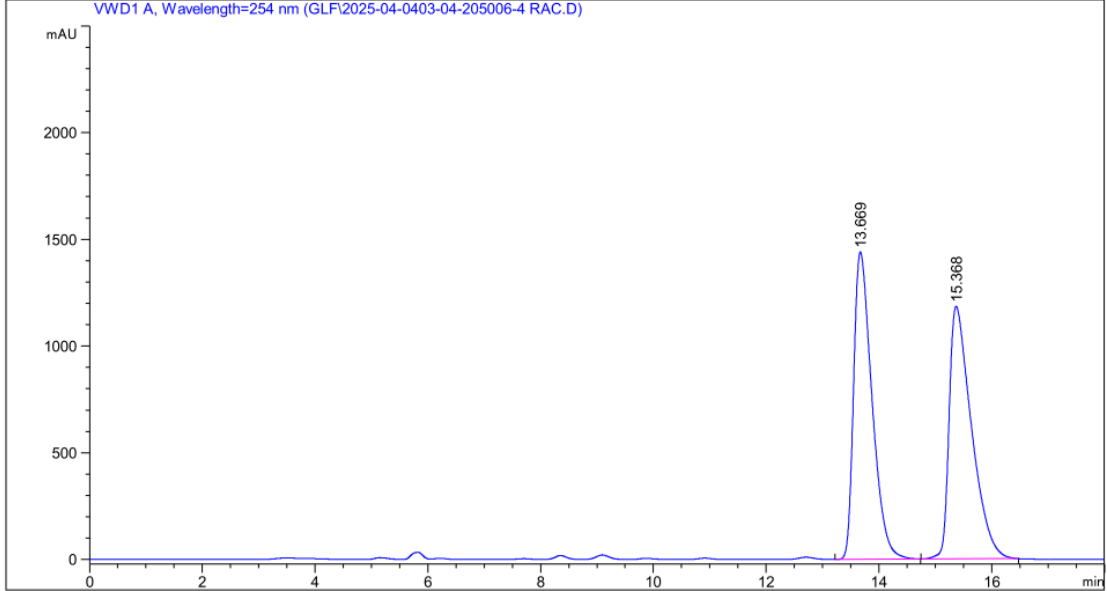

| Peak # | RetTime [min] | Type | Width [min] | Area [mAU*s] | Height [mAU] | Area %  |
|--------|---------------|------|-------------|--------------|--------------|---------|
| 1      | 13.669        | BB   | 0.3432      | 3.24857e4    | 1440.04614   | 49.9344 |
| 2      | 15.368        | BBA  | 0.4081      | 3.25711e4    | 1183.53186   | 50.0656 |

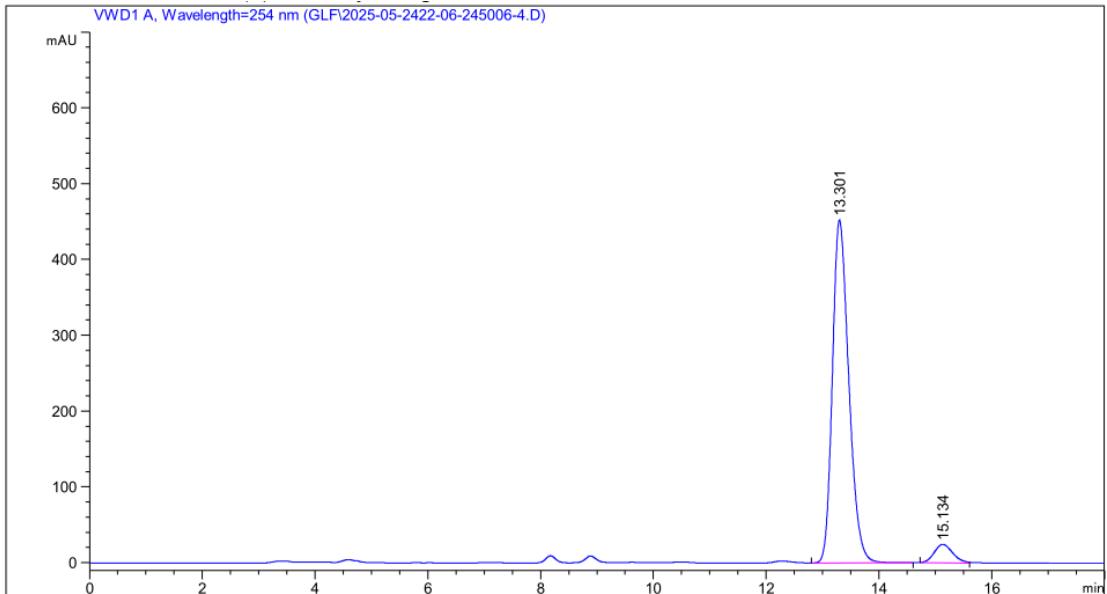

| Peak # | RetTime [min] | Type | Width [min] | Area [mAU*s] | Height [mAU] | Area %  |
|--------|---------------|------|-------------|--------------|--------------|---------|
| 1      | 13.301        | VB   | 0.3120      | 9148.14746   | 452.32254    | 94.2586 |
| 2      | 15.134        | FM   | 0.3801      | 557.21991    | 24.43425     | 5.7414  |

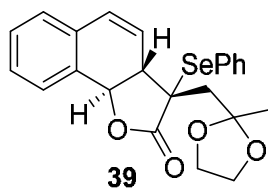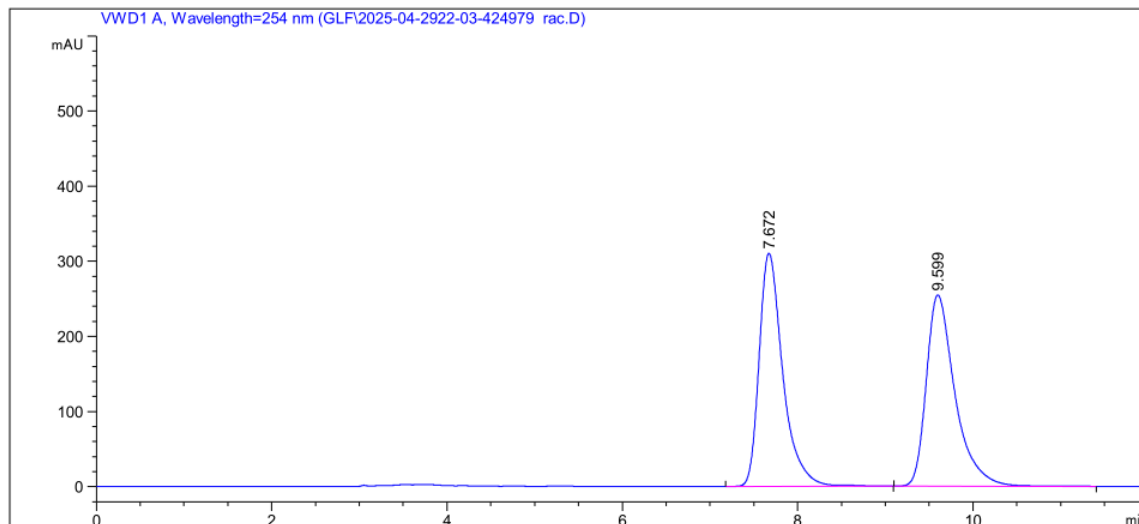

| Peak # | RetTime [min] | Type | Width [min] | Area [mAU*s] | Height [mAU] | Area %  |
|--------|---------------|------|-------------|--------------|--------------|---------|
| 1      | 7.672         | BV R | 0.2850      | 5823.56396   | 310.17255    | 50.1421 |
| 2      | 9.599         | BB   | 0.3423      | 5790.55029   | 254.61105    | 49.8579 |

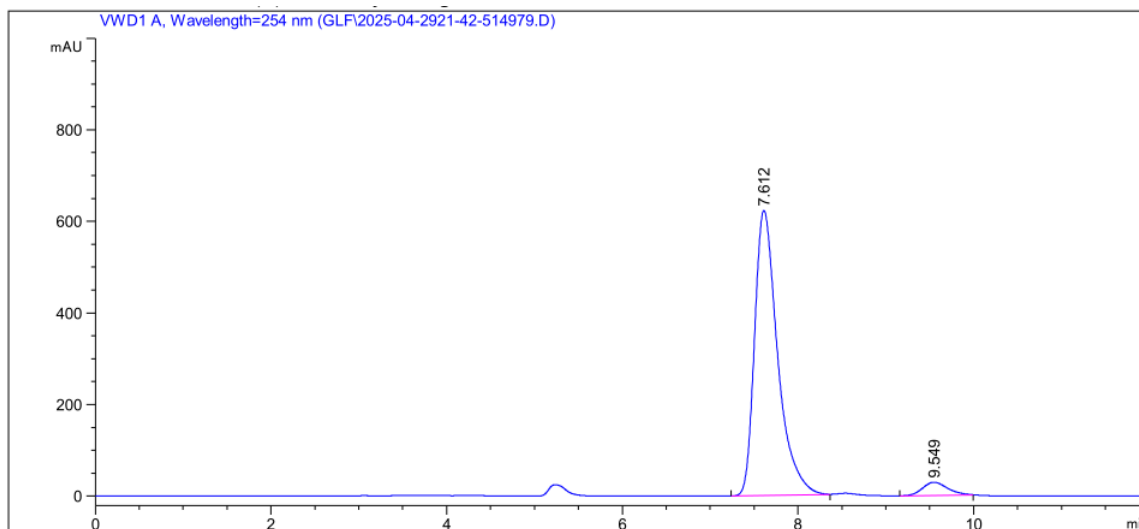

| Peak # | RetTime [min] | Type | Width [min] | Area [mAU*s] | Height [mAU] | Area %  |
|--------|---------------|------|-------------|--------------|--------------|---------|
| 1      | 7.612         | BB   | 0.2764      | 1.13279e4    | 622.18732    | 95.2438 |
| 2      | 9.549         | BBA  | 0.3051      | 565.68060    | 28.56109     | 4.7562  |
